# Supplementary material for: Brønsted acid-mediated selective α-alkenylation of 3,4-dihydro-2H-pyrans
Source: Royal Society of Chemistry journal article supplement (doi:10.1039/d4qo00541d), 2024-01-01
Supplement: d4qo00541d1.pdf [file d4qo00541d1.pdf]

## Supporting Information

### **Brønsted Acid-Mediated Selective $\alpha$ -Alkenylation of 3,4-Dihydro-2*H*-pyrans**

Nan Chen<sup>a</sup>, Chaokun Li<sup>a</sup>, Shangteng Liao<sup>b</sup>, Jinglong Chen<sup>\*b</sup>, Xingxing Ma<sup>a</sup> and  
Qiuling Song<sup>\*a, c, d</sup>

<sup>a</sup> Key Laboratory of Molecule Synthesis and Function Discovery, Fujian Province University, College of Chemistry at Fuzhou University, Fuzhou, Fujian, 350108, China

<sup>b</sup> College of Materials Science and Engineering, Fuzhou University, Fuzhou, Fujian Province, 350108, China

<sup>c</sup> State Key Laboratory of Organometallic Chemistry, Shanghai Institute of Organic Chemistry, Chinese Academy of Sciences, Shanghai 200032, China

<sup>d</sup> School of Chemistry and Chemical Engineering, Henan Normal University, Xinxiang, Henan, 453007, China

\*Corresponding author. E-mail: [qsong@fzu.edu.cn](mailto:qsong@fzu.edu.cn); [jchen@fzu.edu.cn](mailto:jchen@fzu.edu.cn)

## Table of Contents

|                                                                                                  |            |
|--------------------------------------------------------------------------------------------------|------------|
| <b>1. General methods .....</b>                                                                  | <b>3</b>   |
| <b>2. Optimization of Experimental Conditions .....</b>                                          | <b>4</b>   |
| <b>3. General procedures for the preparation of the starting materials.....</b>                  | <b>5</b>   |
| 3.1 General procedure A for preparation of potassium alkenyltrifluoroborates ...                 | 5          |
| 3.2 General procedure B for preparation of 2-substituted 3,4-dihydro-2 <i>H</i> -pyrans<br>..... | 5          |
| 3.3 General procedure C for preparation of 2-substituted 3,4-dihydro-2 <i>H</i> -pyrans<br>..... | 6          |
| 3.4 General procedure D for preparation of 2-substituted 3,4-dihydro-2 <i>H</i> -pyrans<br>..... | 6          |
| <b>4. General procedure for the preparation of the products.....</b>                             | <b>7</b>   |
| 4.1 General procedure E for $\alpha$ -alkenylation of vinyl ethers .....                         | 7          |
| 4.2 General procedure F for alkenylation-Ferrier process of glycals .....                        | 7          |
| <b>5. Characterization of the starting materials .....</b>                                       | <b>8</b>   |
| <b>6. Characterization of Products.....</b>                                                      | <b>22</b>  |
| <b>7. Scale-up reactions and synthetic applications.....</b>                                     | <b>47</b>  |
| 7.1 12 mmol scale reactions .....                                                                | 47         |
| 7.2 Synthetic applications.....                                                                  | 47         |
| <b>8. Control experiments. ....</b>                                                              | <b>51</b>  |
| <b>9. General methods for determination of the d.r. ratios and configurations.....</b>           | <b>52</b>  |
| <b>10. NMR Spectroscopic Data.....</b>                                                           | <b>59</b>  |
| <b>11. Supplementary References .....</b>                                                        | <b>137</b> |

## 1. General methods

All experiments were conducted with a Schlenk tube under an argon atmosphere. Flash column chromatography was performed over silica gel (200-300 mesh). Analytical thin-layer chromatography (TLC) was carried out on Merck 60 F254 pre-coated silica gel plate (0.2 mm thickness). Visualization was accomplished by UV light (254 nm), phosphomolybdic acid or  $\text{KMnO}_4$  staining solutions followed by heating, also by Gas Chromatograph-Mass spectrometer analysis (GC-MS). Unless otherwise noted, materials obtained from commercial suppliers were used without further purification.  $^1\text{H}$  NMR,  $^{13}\text{C}$  NMR and  $^{19}\text{F}$  NMR spectrum were recorded at ambient temperature using Bruker Ascend<sup>TM</sup> 400 (400 MHz) spectrometer, Bruker AVANCE III 500M spectrometers or JNM-ECZ500R/S1 (500 MHz) spectrometer.  $^1\text{H}$  NMR chemical shifts (in ppm) were referenced to  $\text{CDCl}_3$  ( $\delta = 7.26$  ppm), Acetone- $d_6$  ( $\delta = 2.05$  ppm) and DMSO- $d_6$  ( $\delta = 2.50$  ppm) as internal standards.  $^{13}\text{C}$  NMR spectrum were obtained by using the same NMR spectrometers and were calibrated with  $\text{CDCl}_3$  ( $\delta = 77.0$  ppm). The following abbreviations are used: s = singlet, d = doublet, t = triplet, q = quartet, dd, = double doublet, dt = double triplet, td = triple doublet, m = multiplet. HRMS data were obtained on Thermo Scientific Orbitrap Elite Mass Spectrometer with an ESI source (Ion Trap) or Agilent 7820A GC-MS with EI mode.

## 2. Optimization of Experimental Conditions

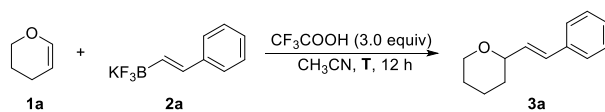

**Table S1**<sup>[a]</sup>

| Entry | T /°C | Yield of <b>3a</b> (%) <sup>b</sup> |
|-------|-------|-------------------------------------|
| 1     | -30   | 46                                  |
| 2     | -10   | 50                                  |
| 3     | RT    | 64(63 °)                            |
| 4     | 40    | 50                                  |
| 5     | 60    | 60                                  |
| 6     | 80    | 61                                  |
| 7     | 120   | 32                                  |

<sup>[a]</sup> Reaction conditions: **1a** (0.2 mmol, 1.0 equiv), **2a** (0.5 mmol, 2.5 equiv), CF<sub>3</sub>COOH (0.6 mmol, 3.0 equiv),

CH<sub>3</sub>CN (2.0 mL). <sup>[b]</sup> Determined by GC analysis by using dodecane as the internal standard. <sup>[c]</sup> Isolated yield.

**Table S2**<sup>[a]</sup>

| Entry | Additive (1 equiv)      | Yield of <b>3a</b> (%) <sup>b</sup> |
|-------|-------------------------|-------------------------------------|
| 1     | Zn(OTf) <sub>2</sub>    | 53                                  |
| 2     | ZnI <sub>2</sub>        | 56                                  |
| 3     | FeCl <sub>2</sub>       | 73                                  |
| 4     | Fe(OAc) <sub>2</sub>    | 54                                  |
| 5     | Fe(OTf) <sub>2</sub>    | 63                                  |
| 6     | NaOTf                   | 55                                  |
| 7     | Bromoferrocene          | 63                                  |
| 8     | Ferrocene               | 58                                  |
| 9     | CuI                     | 52                                  |
| 10    | Ni(dppf)Cl <sub>2</sub> | 50                                  |

<sup>[a]</sup> Reaction conditions: **1a** (0.2 mmol, 1.0 equiv), **2a** (0.5 mmol, 2.5 equiv), CF<sub>3</sub>COOH (0.6 mmol, 3.0 equiv),

CH<sub>3</sub>CN (2.0 mL). **additive (1.0 equiv)** <sup>[b]</sup> Determined by GC analysis by using dodecane as the internal standard.

**Table S3**<sup>[a]</sup>

| Entry | FeCl <sub>2</sub> (X equiv) | Yield of <b>4a</b> (%) <sup>b</sup> |
|-------|-----------------------------|-------------------------------------|
| 1     | 0.1                         | 60                                  |
| 2     | 0.2                         | 76                                  |
| 3     | 0.5                         | 75                                  |
| 4     | 1.5                         | 73                                  |
| 5     | 2.0                         | 66                                  |

<sup>[a]</sup> Reaction conditions: **1a** (0.2 mmol, 1.0 equiv), **2a** (0.5 mmol, 2.5 equiv), CF<sub>3</sub>COOH (0.6 mmol, 3.0 equiv),

CH<sub>3</sub>CN (2.0 mL). **FeCl<sub>2</sub> (X equiv)** <sup>[b]</sup> Determined by GC analysis by using dodecane as the internal standard; <sup>[c]</sup>

Isolated yield.



### 3. General procedures for the preparation of the starting materials

#### 3.1 General procedure A for preparation of potassium alkenyltrifluoroborates (2a-2t)<sup>1,2</sup>

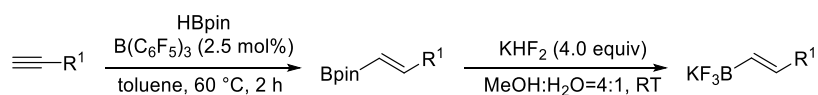

To a 50 mL Schlenk flask equipped with a magnetic stirring bar, B(C<sub>6</sub>F<sub>5</sub>)<sub>3</sub> (2.5 mol%) was added and the flask was evacuated and refilled with argon (three times). The alkyne compound (1.0 equiv) was dissolved in toluene and added into the flask. The reaction mixture was stirred and heated at 60 °C for 2 h. After cooling to room temperature, the reaction mixture was evaporated to dryness in vacuo. Then the crude product and MeOH was added to a 100 mL Erlenmeyer flask equipped with a magnetic stirring bar. An aqueous solution of potassium hydrogen fluoride (KHF<sub>2</sub>, 4 M in H<sub>2</sub>O, 4.0 equiv) was slowly added to the flask. Upon completion of the addition, the flask was stirred overnight. The resulting mixture was transferred to a 250 mL round-bottom flask, and the mixture was diluted with toluene for azeotropic removal water. The biphasic mixture was concentrated under reduced pressure using rotary evaporation (20 mbar/40–50 °C). Subsequently, toluene/MeOH mixture (v/v = 10: 1) were added to the resulting residue and concentrated under reduced pressure. This process was repeated four times. The resulting residue was dissolved in acetone and filtered to remove insoluble salts. The combined filtrate was diluted with toluene and concentrated under reduced pressure. This cycle was repeated two times. The flask was dried overnight under high vacuum on a Schlenk line to give the desired potassium trifluoroborates as white solid.

#### 3.2 General procedure B for preparation of 2-substituted 3,4-dihydro-2H-pyrans (4c-l)<sup>3</sup>

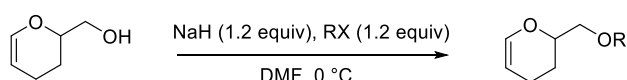

To a 100 mL Schlenk flask equipped with a magnetic stirring bar and evacuated and refilled with argon (three times), 2-hydroxymethyl-3,4-dihydro-2H-pyran in DMF was

added and cooled to 0 °C. Then NaH (1.2 equiv) was slowly added. The mixture was stirred for 20 min and halide compound (1.2 equiv) was then added dropwise. After the starting material was completely consumed (detected by TLC), the reaction mixture was diluted with ethyl acetate, washed with saturated aqueous NH<sub>4</sub>Cl (2 times), brine (2 times), dried over Na<sub>2</sub>SO<sub>4</sub> and evaporated under reduced pressure. The crude reaction was purified by column chromatography to afford corresponding product.

### 3.3 General procedure C for preparation of 2-substituted 3,4-dihydro-2*H*-pyrans (4a-b, 4q)<sup>4</sup>

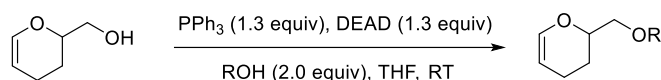

To a 100 mL Schlenk flask equipped with a magnetic stirring bar, 2-hydroxymethyl-3,4-dihydro-2*H*-pyran and PPh<sub>3</sub> (1.3 equiv) were added and the flask was evacuated and refilled with argon (three times). Dry THF (20 mL) and phenol compound (2.0 equiv) was added at room temperature. Then, diethyl azodicarboxylate (1.3 equiv) was added dropwise. After stirring for 4 h, the reaction mixture was diluted with ethyl acetate, washed with saturated aqueous NH<sub>4</sub>Cl (2 times), brine (2 times), dried over Na<sub>2</sub>SO<sub>4</sub> and evaporated under reduced pressure. The crude reaction was purified by column chromatography to afford corresponding product.

### 3.4 General procedure D for preparation of 2-substituted 3,4-dihydro-2*H*-pyrans (4m-o, 4r-s)<sup>5</sup>

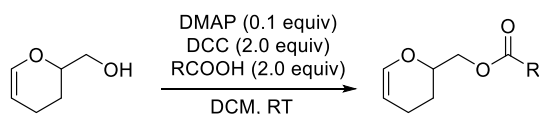

To a 25 mL round-bottom flask, 2-hydroxymethyl-3,4-dihydro-2*H*-pyran, carboxylic acid (2.0 equiv), DMAP (0.1 equiv), DCM and dicyclohexylcarbodiimide (2.0 equiv) were successively added. The mixture was stirred at room temperature overnight and diluted with ethyl acetate, washed with saturated aqueous NH<sub>4</sub>Cl (2 times), brine (2 times), dried over Na<sub>2</sub>SO<sub>4</sub> and evaporated under reduced pressure. The crude reaction was purified by column chromatography to afford corresponding product.



## 5. Characterization of the starting materials

### Potassium (E)-trifluoro(styryl)borate (2a)

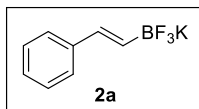

Following the **procedure A** on 10 mmol scale, white solid, yield: 77% (1.52 g).

Spectroscopic data are in agreement with those previously reported<sup>6</sup>.

<sup>1</sup>H NMR (500 MHz, DMSO-*d*<sub>6</sub>) δ 7.36 – 7.29 (m, 2H), 7.25 (m, 2H), 7.11 (m, 1H), 6.48 (d, *J* = 18.2 Hz, 1H), 6.19 (dq, *J* = 18.2, 3.6 Hz, 1H).

### Potassium (E)-trifluoro(4-methylstyryl)borate (2b)

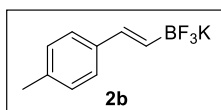

Following the **procedure A** on 5 mmol scale, white solid, yield: 66% (0.74 g).

Spectroscopic data are in agreement with those previously reported<sup>6</sup>.

<sup>1</sup>H NMR (500 MHz, DMSO-*d*<sub>6</sub>) δ 7.19 (d, *J* = 8.2 Hz, 2H), 7.05 (d, *J* = 7.9 Hz, 2H), 6.42 (d, *J* = 18.2 Hz, 1H), 6.10 (dq, *J* = 18.2, 3.6 Hz, 1H), 2.25 (s, 3H).

### Potassium (E)-(4-(tert-butyl)styryl)trifluoroborate (2c)

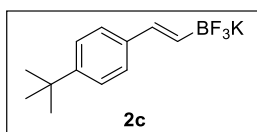

Following the **procedure A** on 5 mmol scale, white solid, yield: 78% (1.04 g).

Spectroscopic data are in agreement with those previously reported<sup>7</sup>.

<sup>1</sup>H NMR (500 MHz, DMSO-*d*<sub>6</sub>) δ 7.30 – 7.15 (m, 4H), 6.43 (d, *J* = 18.2 Hz, 1H), 6.11 (dd, *J* = 18.2, 3.6 Hz, 1H), 1.26 (s, 9H).

**Potassium (E)-trifluoro(4-methoxystyryl)borate (2d)**

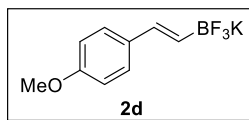

Following the **procedure A** on 5 mmol scale, white solid, yield: 67% (0.81 g). Spectroscopic data are in agreement with those previously reported<sup>8</sup>.

<sup>1</sup>H NMR (500 MHz, DMSO-*d*<sub>6</sub>) δ 7.30 – 7.17 (m, 2H), 6.90 – 6.76 (m, 2H), 6.38 (d, J = 18.1 Hz, 1H), 6.05 – 5.92 (m, 1H), 3.72 (s, 3H).

**Potassium (E)-2-([1,1'-biphenyl]-4-yl)vinyltrifluoroborate (2e)**

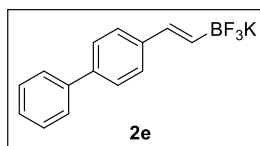

Following the **procedure A** on 5 mmol scale, white solid, yield: 53% (0.76 g). Spectroscopic data are in agreement with those previously reported<sup>11</sup>.

<sup>1</sup>H NMR (500 MHz, DMSO-*d*<sub>6</sub>) δ 7.67 – 7.62 (m, 2H), 7.56 (d, J = 8.2 Hz, 2H), 7.48 – 7.38 (m, 4H), 7.32 (m, 1H), 6.51 (d, J = 18.2 Hz, 1H), 6.25 (m, 1H).

**Potassium (E)-trifluoro(4-(trifluoromethoxy)styryl)borate (2f)**

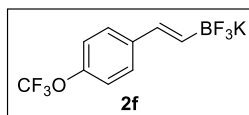

Following the **procedure A** on 5 mmol scale, white solid, yield: 53% (0.76 g). Spectroscopic data are in agreement with those previously reported<sup>12</sup>.

<sup>1</sup>H NMR (500 MHz, DMSO-*d*<sub>6</sub>) δ 7.56 – 7.37 (m, 2H), 7.22 (d, J = 8.2 Hz, 2H), 6.49 (d, J = 18.4 Hz, 1H), 6.22 (m, 1H).

**Potassium (E)-trifluoro(4-fluorostyryl)borate (2g)**

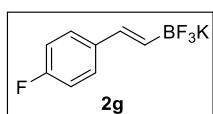

Following the **procedure A** on 5 mmol scale, white solid, yield: 71% (0.81 g).

Spectroscopic data are in agreement with those previously reported<sup>6</sup>.

<sup>1</sup>H NMR (500 MHz, DMSO-*d*<sub>6</sub>) δ 7.51 – 7.21 (m, 2H), 7.14 – 6.95 (m, 2H), 6.43 (d, J = 18.2 Hz, 1H), 6.10 (m, 1H).

**Potassium (E)-(4-chlorostyryl)trifluoroborate (2h)**

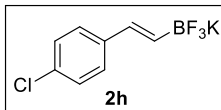

Following the **procedure A** on 5 mmol scale, white solid, yield: 68% (0.83 g).

Spectroscopic data are in agreement with those previously reported<sup>6</sup>.

<sup>1</sup>H NMR (500 MHz, DMSO-*d*<sub>6</sub>) δ 7.44 – 6.84 (m, 4H), 6.44 (d, J = 18.3 Hz, 1H), 6.32 – 6.06 (m, 1H).

**Potassium (E)-(4-bromostyryl)trifluoroborate (2i)**

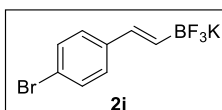

Following the **procedure A** on 5 mmol scale, white solid, yield: 69% (1.00 g).

Spectroscopic data are in agreement with those previously reported<sup>8</sup>.

<sup>1</sup>H NMR (500 MHz, DMSO-*d*<sub>6</sub>) δ 7.51 – 7.35 (m, 2H), 7.30 – 7.21 (m, 2H), 6.42 (d, J = 18.2 Hz, 1H), 6.36 – 6.11 (m, 1H).

**Potassium (E)-trifluoro(3-methoxystyryl)borate (2j)**

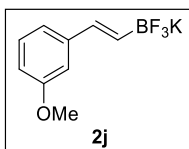

Following the **procedure A** on 5 mmol scale, white solid, yield: 78% (0.94 g).

Spectroscopic data are in agreement with those previously reported<sup>9</sup>.

<sup>1</sup>H NMR (500 MHz, DMSO-*d*<sub>6</sub>) δ 7.15 (t, J = 7.8 Hz, 1H), 6.93 – 6.80 (m, 2H), 6.68 (dd, J = 8.3, 2.5 Hz, 1H), 6.42 (d, J = 18.2 Hz, 1H), 6.25 – 6.04 (m, 1H), 3.73 (s, 3H).

### Potassium (E)-trifluoro(2-methoxystyryl)borate (2k)

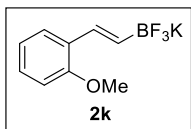

Following the **procedure A** on 5 mmol scale, white solid, yield: 46% (0.55 g).

Spectroscopic data are in agreement with those previously reported<sup>10</sup>.

<sup>1</sup>H NMR (500 MHz, DMSO-*d*<sub>6</sub>) δ 7.39 (dd, *J* = 7.5, 1.7 Hz, 1H), 7.09 (m, 1H), 6.92 – 6.74 (m, 3H), 6.06 (dd, *J* = 18.4, 3.5 Hz, 1H), 3.75 (s, 3H).

### Potassium (E)-trifluoro(2-(naphthalen-1-yl)vinyl)borate (2l)

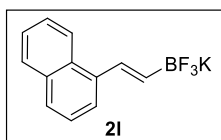

Following the **procedure A** on 5 mmol scale, white solid, yield: 65% (0.85 g).

Spectroscopic data are in agreement with those previously reported<sup>9</sup>.

<sup>1</sup>H NMR (500 MHz, DMSO-*d*<sub>6</sub>) δ 8.15 (d, *J* = 8.1 Hz, 1H), 7.87 (dd, *J* = 7.7, 1.8 Hz, 1H), 7.72 (d, *J* = 8.1 Hz, 1H), 7.56 (d, *J* = 7.1 Hz, 1H), 7.53 – 7.41 (m, 3H), 7.24 (d, *J* = 17.9 Hz, 1H), 6.41 – 6.05 (m, 1H).

### Potassium (E)-trifluoro(2-(thiophen-2-yl)vinyl)borate (2m)

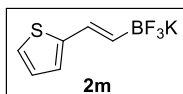

Following the **procedure A** on 5 mmol scale, white solid, yield: 85% (0.92 g).

Spectroscopic data are in agreement with those previously reported<sup>6</sup>.

<sup>1</sup>H NMR (500 MHz, DMSO-*d*<sub>6</sub>) δ 7.18 (d, *J* = 5.1 Hz, 1H), 6.91 (dd, *J* = 5.1, 3.4 Hz, 1H), 6.80 (d, *J* = 3.5 Hz, 1H), 6.56 (d, *J* = 17.9 Hz, 1H), 5.89 (m, 1H).

### Potassium (E)-trifluoro(2-(thiophen-3-yl)vinyl)borate (2n)

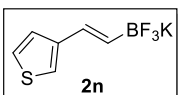

Following the **procedure A** on 5 mmol scale, white solid, yield: 70% (0.76 g). Spectroscopic data are in agreement with those previously reported<sup>8</sup>.

**<sup>1</sup>H NMR (500 MHz, DMSO-*d*<sub>6</sub>)** δ 7.37 (dd, *J* = 5.2, 2.8 Hz, 1H), 7.20 (dd, *J* = 5.1, 0.9 Hz, 1H), 7.12 (d, *J* = 2.6 Hz, 1H), 6.46 (d, *J* = 18.2 Hz, 1H), 5.96 (dq, *J* = 18.2, 3.6 Hz, 1H).

#### Potassium (E)-(2-cyclopropylvinyl)trifluoroborate (2o)

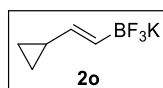

Following the **procedure A** on 5 mmol scale, white solid, yield: 51% (0.44 g). Spectroscopic data are in agreement with those previously reported<sup>6</sup>.

**<sup>1</sup>H NMR (500 MHz, DMSO-*d*<sub>6</sub>)** δ 5.35 – 5.15 (m, 1H), 4.98 (dd, *J* = 17.5, 8.3 Hz, 1H), 1.39 – 1.08 (m, 1H), 0.57 – 0.42 (m, 2H), 0.22 – 0.08 (m, 2H).

#### Potassium (E)-dec-1-en-1-yltrifluoroborate (2p)

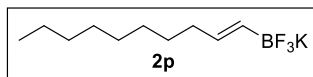

Following the **procedure A** on 5 mmol scale, white solid, yield: 60% (0.74 g). Spectroscopic data are in agreement with those previously reported<sup>14</sup>.

**<sup>1</sup>H NMR (500 MHz, DMSO-*d*<sub>6</sub>)** δ 5.45 (dt, *J* = 17.6, 6.3 Hz, 1H), 5.33 – 5.15 (m, 1H), 1.86 (q, *J* = 6.6 Hz, 2H), 1.47 – 1.10 (m, 13H), 0.85 (t, *J* = 6.8 Hz, 3H).

#### Potassium (E)-(6-chlorohex-1-en-1-yl)trifluoroborate (2q)

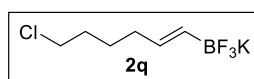

Following the **procedure A** on 5 mmol scale, white solid, yield: 58% (0.65 g). Spectroscopic data are in agreement with those previously reported<sup>14</sup>.

**<sup>1</sup>H NMR (500 MHz, DMSO-*d*<sub>6</sub>)** δ 5.46 (m, 1H), 5.33 – 5.13 (m, 1H), 3.61 (t, *J* = 6.7 Hz, 2H), 1.90 (q, *J* = 7.0 Hz, 2H), 1.68 (m, 2H), 1.48 – 1.07 (m, 2H).



### Potassium trifluoro(4-methoxyphenyl)borate (2r)

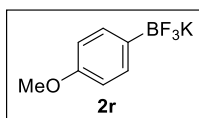

Following the **procedure A** on 5 mmol scale, white solid, yield: 80% (0.86 g). Spectroscopic data are in agreement with those previously reported<sup>13</sup>.

<sup>1</sup>H NMR (500 MHz, Acetone-*d*<sub>6</sub>) δ 7.38 (d, *J* = 8.2 Hz, 1H), 6.67 (d, *J* = 8.3 Hz, 1H), 3.70 (s, 2H).

### Potassium (E)-trifluoro(hex-1-en-1-yl)borate (2s)

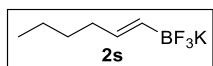

Following the **procedure A** on 5 mmol scale, white solid, yield: 30% (0.29 g). Spectroscopic data are in agreement with those previously reported<sup>8</sup>.

<sup>1</sup>H NMR (500 MHz, DMSO-*d*<sub>6</sub>) δ 5.56 – 5.36 (m, 1H), 5.25 – 5.14 (m, 1H), 2.01 – 1.78 (m, 2H), 1.30 – 1.21 (m, 4H), 0.93 – 0.78 (m, 3H).

### Potassium (E)-trifluoro(pent-1-en-1-yl)borate (2t)

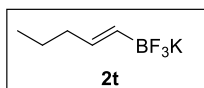

Following the **procedure A** on 5 mmol scale, white solid, yield: 41% (0.36 g). Spectroscopic data are in agreement with those previously reported<sup>13</sup>.

<sup>1</sup>H NMR (500 MHz, DMSO-*d*<sub>6</sub>) δ 5.51 – 5.41 (m, 1H), 5.20 (m, 1H), 1.92 – 1.76 (m, 2H), 1.28 (m, 2H), 0.84 (t, *J* = 7.4 Hz, 3H).

### 4-((3,4-dihydro-2H-pyran-2-yl)methoxy)benzonitrile (4a)

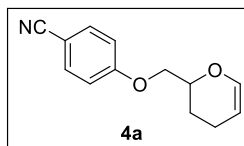

Following the **procedure C** on 5 mmol scale, white solid (m. p. = 70-72 °C), yield: 92% (0.99 g), *R*<sub>f</sub> = 0.5 (silica gel, PE: EtOAc = 20:1, v/v), column chromatography (silica

gel, PE: EtOAc = 80:1, v/v).

**<sup>1</sup>H NMR (500 MHz, CDCl<sub>3</sub>)** δ 7.55 – 7.48 (m, 2H), 6.96 – 6.88 (m, 2H), 6.34 (dt, J = 6.2, 2.0 Hz, 1H), 4.69 (m, 1H), 4.16 (m, 1H), 4.11 – 3.97 (m, 2H), 2.17 – 2.05 (m, 1H), 2.02 – 1.86 (m, 2H), 1.75 (m, 1H).

**<sup>13</sup>C NMR (126 MHz, CDCl<sub>3</sub>)** δ 161.92 (s), 143.21 (s), 133.92 (s), 119.08 (s), 115.25 (s), 104.19 (s), 100.72 (s), 72.78 (s), 70.31 (s), 24.27 (s), 19.07 (s).

**HRMS (EI):** [M] Calcd. for C<sub>13</sub>H<sub>13</sub>NO<sub>2</sub> 215.0946; Found 215.0939.

### 2-((4-ethylphenoxy)methyl)-3,4-dihydro-2H-pyran (4b)

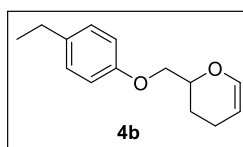

Following the **procedure C** on 5 mmol scale, colorless oil liquid, yield: 95% (1.04 g), R<sub>f</sub> = 0.6 (silica gel, PE: EtOAc = 20:1, v/v), column chromatography (silica gel, PE: EtOAc = 80:1, v/v).

**<sup>1</sup>H NMR (500 MHz, CDCl<sub>3</sub>)** δ 7.23 – 7.16 (m, 2H), 6.98 – 6.91 (m, 2H), 6.51 (dt, J = 6.0, 1.8 Hz, 1H), 4.80 (m, 1H), 4.26 (m, 1H), 4.22 – 3.96 (m, 2H), 2.67 (q, J = 7.6 Hz, 2H), 2.26 – 2.15 (m, 1H), 2.14 – 2.00 (m, 2H), 1.86 (m, 1H), 1.30 (td, J = 7.6, 1.4 Hz, 3H).

**<sup>13</sup>C NMR (126 MHz, CDCl<sub>3</sub>)** δ 156.66 (s), 143.32 (s), 136.44 (s), 128.48 (s), 114.31 (s), 100.33 (s), 73.05 (s), 69.98 (s), 27.78 (s), 24.38 (s), 19.03 (s), 15.66 (s).

**HRMS (EI):** [M] Calcd. for C<sub>14</sub>H<sub>18</sub>O<sub>2</sub> 218.1307; Found 218.1299.

### 2-((benzyloxy)methyl)-3,4-dihydro-2H-pyran (4c)

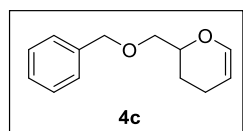

Following the **procedure B** on 5 mmol scale, colorless oil liquid, yield: 85% (0.87 g). Spectroscopic data are in agreement with those previously reported<sup>3</sup>.

**<sup>1</sup>H NMR (500 MHz, CDCl<sub>3</sub>)** δ 7.37 (m, 4H), 7.30 (m, 1H), 6.42 (d, J = 6.2 Hz, 1H),

4.73 – 4.67 (m, 1H), 4.66 – 4.51 (m, 2H), 4.04 (m, 1H), 3.69 – 3.46 (m, 2H), 2.11 (m, 1H), 2.03 – 1.94 (m, 1H), 1.86 (m, 1H), 1.71 (m, 1H).

#### 2-(methoxymethyl)-3,4-dihydro-2H-pyran (4d)

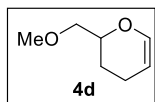

Following the **procedure B** on 5 mmol scale, colorless oil liquid, yield: 80% (0.51 g). Spectroscopic data are in agreement with those previously reported<sup>3</sup>.

<sup>1</sup>H NMR (500 MHz, CDCl<sub>3</sub>) δ 6.34 (dt, J = 6.2, 1.9 Hz, 1H), 4.63 (m, 1H), 3.94 (m, 1H), 3.52 – 3.39 (m, 2H), 3.36 (s, 3H), 2.06 (m, 1H), 1.97 – 1.88 (m, 1H), 1.81 – 1.74 (m, 1H), 1.63 (m, 1H).

#### 2-(((4-methylbenzyl)oxy)methyl)-3,4-dihydro-2H-pyran (4e)

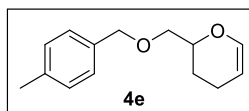

Following the **procedure B** on 5 mmol scale, colorless oil liquid, yield: 57% (0.62 g), R<sub>f</sub> = 0.6 (silica gel, PE: EtOAc = 20:1, v/v), column chromatography (silica gel, PE: EtOAc = 80:1, v/v).

<sup>1</sup>H NMR (500 MHz, CDCl<sub>3</sub>) δ 7.27 – 7.22 (m, 2H), 7.16 (d, J = 7.8 Hz, 2H), 6.40 (dt, J = 6.3, 1.9 Hz, 1H), 4.68 (m, 1H), 4.61 – 4.49 (m, 2H), 4.02 (m, 1H), 3.63 – 3.45 (m, 2H), 2.35 (s, 3H), 2.09 (m, 1H), 1.96 (m, 1H), 1.88 – 1.80 (m, 1H), 1.74 – 1.63 (m, 1H).

<sup>13</sup>C NMR (126 MHz, CDCl<sub>3</sub>) δ 143.53 (s), 137.24 (s), 134.98 (s), 128.98 (s), 127.78 (s), 100.36 (s), 74.00 (s), 73.19 (s), 72.17 (s), 24.51 (s), 21.07 (s), 19.28 (s).

HRMS (EI): [M] Calcd. for C<sub>14</sub>H<sub>18</sub>O<sub>2</sub> 218.1307; Found 218.1305.

#### 2-(((1,1'-biphenyl)-4-ylmethoxy)methyl)-3,4-dihydro-2H-pyran (4f)

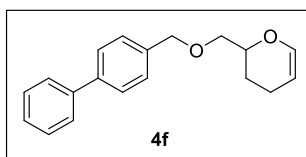

Following the **procedure B** on 5 mmol scale, colorless oil liquid, yield: 48% (0.68 g),  $R_f = 0.5$  (silica gel, PE: EtOAc = 20:1, v/v), column chromatography (silica gel, PE: EtOAc = 80:1, v/v).

$^1\text{H NMR}$  (500 MHz,  $\text{CDCl}_3$ )  $\delta$  7.67 – 7.55 (m, 4H), 7.52 – 7.43 (m, 4H), 7.40 – 7.32 (m, 1H), 6.45 (dt,  $J = 6.3, 2.0$  Hz, 1H), 4.72 (m, 1H), 4.70 – 4.62 (m, 2H), 4.08 (m, 1H), 3.69 – 3.55 (m, 2H), 2.19 – 2.07 (m, 1H), 2.01 (m, 1H), 1.93 – 1.85 (m, 1H), 1.74 (m, 1H).

$^{13}\text{C NMR}$  (126 MHz,  $\text{CDCl}_3$ )  $\delta$  143.54 (s), 140.82 (s), 140.54 (s), 137.11 (s), 128.69 (s), 128.13 (s), 127.20 (s), 127.09 (s), 127.01 (s), 100.43 (s), 74.02 (s), 73.07 (s), 72.46 (s), 24.52 (s), 19.31 (s).

**HRMS (EI):** [M] Calcd. for  $\text{C}_{19}\text{H}_{20}\text{O}_2$  280.1463; Found 280.1470.

#### 2-(((2-methylbenzyl)oxy)methyl)-3,4-dihydro-2H-pyran (4g)

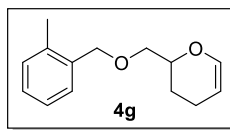

Following the **procedure B** on 5 mmol scale, colorless oil liquid, yield: 72% (0.78 g),  $R_f = 0.6$  (silica gel, PE: EtOAc = 20:1, v/v), column chromatography (silica gel, PE: EtOAc = 80:1, v/v).

$^1\text{H NMR}$  (500 MHz,  $\text{CDCl}_3$ )  $\delta$  7.34 (dd,  $J = 7.6, 1.8$  Hz, 1H), 7.24 – 7.15 (m, 3H), 6.41 (dt,  $J = 6.2, 2.0$  Hz, 1H), 4.70 (m, 1H), 4.65 – 4.55 (m, 2H), 4.04 (m, 1H), 3.65 – 3.50 (m, 2H), 2.36 (s, 3H), 2.16 – 2.06 (m, 1H), 2.04 – 1.94 (m, 1H), 1.91 – 1.81 (m, 1H), 1.71 (m, 1H).

$^{13}\text{C NMR}$  (126 MHz,  $\text{CDCl}_3$ )  $\delta$  143.56 (s), 136.77 (s), 135.91 (s), 130.20 (s), 128.64 (s), 127.81 (s), 125.67 (s), 100.42 (s), 74.00 (s), 72.48 (s), 71.85 (s), 24.58 (s), 19.31 (s), 18.77 (s).

**HRMS (EI):** [M] Calcd. for  $\text{C}_{14}\text{H}_{18}\text{O}_2$  218.1307; Found 218.1314.

### 2-(((3-methylbenzyl)oxy)methyl)-3,4-dihydro-2H-pyran (**4h**)

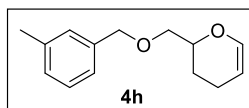

Following the **procedure B** on 5 mmol scale, colorless oil liquid, yield: 76% (0.83 g),  $R_f = 0.6$  (silica gel, PE: EtOAc = 20:1, v/v), column chromatography (silica gel, PE: EtOAc = 80:1, v/v).

$^1\text{H NMR}$  (500 MHz,  $\text{CDCl}_3$ )  $\delta$  7.25 (t,  $J = 7.5$  Hz, 1H), 7.21 – 7.15 (m, 2H), 7.12 (d,  $J = 7.6$  Hz, 1H), 6.42 (dt,  $J = 6.3, 1.9$  Hz, 1H), 4.70 (m, 1H), 4.63 – 4.52 (m, 2H), 4.05 (m, 1H), 3.67 – 3.42 (m, 2H), 2.37 (s, 3H), 2.17 – 2.05 (m, 1H), 2.04 – 1.94 (m, 1H), 1.91 – 1.83 (m, 1H), 1.77 – 1.65 (m, 1H).

$^{13}\text{C NMR}$  (126 MHz,  $\text{CDCl}_3$ )  $\delta$  143.52 (s), 137.95 (s), 137.92 (s), 128.43 (s), 128.31 (s), 128.20 (s), 124.75 (s), 100.37 (s), 73.99 (s), 73.39 (s), 72.39 (s), 24.51 (s), 21.30 (s), 19.28 (s).

**HRMS (EI):** [M] Calcd. for  $\text{C}_{14}\text{H}_{18}\text{O}_2$  218.1307; Found 218.1312.

### 2-(((3,5-dimethylbenzyl)oxy)methyl)-3,4-dihydro-2H-pyran (**4i**)

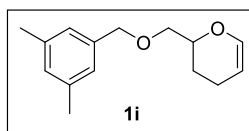

Following the **procedure B** on 5 mmol scale, colorless oil liquid, yield: 66% (0.77 g),  $R_f = 0.6$  (silica gel, PE: EtOAc = 20:1, v/v), column chromatography (silica gel, PE: EtOAc = 80:1, v/v).

$^1\text{H NMR}$  (500 MHz,  $\text{CDCl}_3$ )  $\delta$  7.00 (d,  $J = 1.7$  Hz, 2H), 6.96 (d,  $J = 1.9$  Hz, 1H), 6.44 (dt,  $J = 6.2, 2.0$  Hz, 1H), 4.72 (m, 1H), 4.60 – 4.50 (m, 2H), 4.06 (m, 1H), 3.68 – 3.51 (m, 2H), 2.35 (s, 6H), 2.13 (m, 1H), 2.03 – 1.95 (m, 1H), 1.93 – 1.85 (m, 1H), 1.72 (m, 1H).

$^{13}\text{C NMR}$  (126 MHz,  $\text{CDCl}_3$ )  $\delta$  143.49 (s), 137.83 (s), 137.74 (s), 129.14 (s), 125.50 (s), 100.29 (s), 73.94 (s), 73.39 (s), 72.35 (s), 24.48 (s), 21.12 (s), 19.23 (s).

**HRMS (EI):** [M] Calcd. for  $\text{C}_{15}\text{H}_{20}\text{O}_2$  232.1463; Found 232.1470.

**tert-butyl((3,4-dihydro-2H-pyran-2-yl)methoxy)diphenylsilane (4j)**

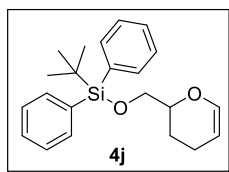

Following the **procedure B** on 5 mmol scale, colorless oil liquid, yield: 70% (1.23 g).

Spectroscopic data are in agreement with those previously reported<sup>15</sup>.

<sup>1</sup>H NMR (500 MHz, CDCl<sub>3</sub>) δ 7.78 (m, 4H), 7.52 – 7.40 (m, 6H), 6.44 (td, *J* = 5.4, 2.9 Hz, 1H). 4.75 – 4.70 (m, 1H), 4.02 (m, 1H), 3.93 – 3.85 (m, 1H), 3.78 (m, 1H), 2.14 (m, 1H), 2.08 – 1.97 (m, 2H), 1.80 (m, 1H), 1.19 – 1.11 (m, 9H).

**(3,4-dihydro-2H-pyran-2-yl)methyl acetate (4k)**

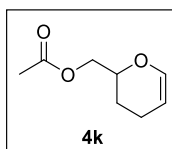

Following the **procedure B** on 5 mmol scale, colorless oil liquid, yield: 85% (0.66 g).

Spectroscopic data are in agreement with those previously reported<sup>3</sup>.

<sup>1</sup>H NMR (500 MHz, CDCl<sub>3</sub>) δ 6.38 (dd, *J* = 6.1, 2.1 Hz, 1H), 4.74 – 4.69 (m, 1H), 4.23 – 4.11 (m, 2H), 4.04 (m, 1H), 2.10 (s, 3H), 2.05 – 1.94 (m, 1H), 1.89 – 1.80 (m, 1H), 1.69 (m, 2H).

**(3,4-dihydro-2H-pyran-2-yl)methyl pivalate (4l)**

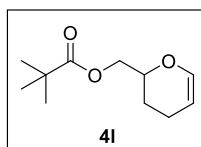

Following the **procedure B** on 5 mmol scale, colorless oil liquid, yield: 86% (0.85 g).

Spectroscopic data are in agreement with those previously reported<sup>3</sup>.

<sup>1</sup>H NMR (500 MHz, CDCl<sub>3</sub>) δ 6.34 (d, *J* = 6.0 Hz, 1H), 4.70 – 4.64 (m, 1H), 4.14 (d, *J* = 5.0 Hz, 2H), 4.00 (m, 1H), 2.14 – 2.03 (m, 1H), 2.01 – 1.94 (m, 1H), 1.83 (m, 1H), 1.71 – 1.60 (m, 1H), 1.20 (s, 9H).

**(3,4-dihydro-2H-pyran-2-yl)methyl 3-(furan-2-yl)propanoate (4m)**

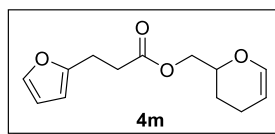

Following the **procedure D** on 5 mmol scale, colorless oil liquid, yield: 86% (1.02 g),  $R_f = 0.5$  (silica gel, PE: EtOAc = 10:1, v/v), column chromatography (silica gel, PE: EtOAc = 50:1, v/v).

**$^1\text{H}$  NMR (500 MHz,  $\text{CDCl}_3$ )**  $\delta$  7.25 (d,  $J = 1.9$  Hz, 1H), 6.33 (dt,  $J = 6.2, 2.0$  Hz, 1H), 6.22 (dd,  $J = 3.2, 1.9$  Hz, 1H), 5.98 (dd,  $J = 3.1, 1.1$  Hz, 1H), 4.66 (m, 1H), 4.21 – 4.10 (m, 2H), 3.98 (m, 1H), 2.94 (dd,  $J = 8.1, 7.1$  Hz, 2H), 2.67 (dd,  $J = 8.3, 6.9$  Hz, 2H), 2.11 – 2.01 (m, 1H), 1.95 (m, 1H), 1.78 (m, 1H), 1.62 (m, 1H).

**$^{13}\text{C}$  NMR (126 MHz,  $\text{CDCl}_3$ )**  $\delta$  172.31 (s), 153.91 (s), 143.20 (s), 141.13 (s), 110.08 (s), 105.24 (s), 100.46 (s), 72.55 (s), 66.17 (s), 32.44 (s), 24.05 (s), 23.31 (s), 19.04 (s).

**HRMS (EI):** [M] Calcd. for  $\text{C}_{13}\text{H}_{16}\text{O}_4$  236.1049; Found 236.1046.

**(3,4-dihydro-2H-pyran-2-yl)methyl 6-bromo-2-naphthoate (4n)**

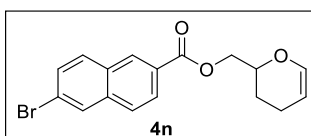

Following the **procedure D** on 5 mmol scale, colorless oil liquid, yield: 93% (1.61 g),  $R_f = 0.5$  (silica gel, PE: EtOAc = 10:1, v/v), column chromatography (silica gel, PE: EtOAc = 50:1, v/v).

**$^1\text{H}$  NMR (500 MHz,  $\text{CDCl}_3$ )**  $\delta$  8.50 (d,  $J = 1.6$  Hz, 1H), 8.04 (dd,  $J = 8.6, 1.7$  Hz, 1H), 7.93 (d,  $J = 2.0$  Hz, 1H), 7.69 (dd,  $J = 16.3, 8.7$  Hz, 2H), 7.52 (dd,  $J = 8.7, 1.9$  Hz, 1H), 6.42 (dt,  $J = 6.3, 1.9$  Hz, 1H), 4.75 – 4.69 (m, 1H), 4.51 – 4.41 (m, 2H), 4.20 (m, 1H), 2.14 (m, 1H), 2.06 – 1.98 (m, 1H), 1.94 (m, 1H), 1.79 (m, 1H).

**$^{13}\text{C}$  NMR (126 MHz,  $\text{CDCl}_3$ )**  $\delta$  166.13 (s), 143.31 (s), 136.32 (s), 130.93 (s), 130.76 (s), 130.73 (s), 130.04 (s), 129.79 (s), 127.52 (s), 127.12 (s), 126.32 (s), 122.58 (s), 100.51 (s), 72.69 (s), 66.79 (s), 24.27 (s), 19.13 (s).

**HRMS (EI):** [M] Calcd. for  $\text{C}_{17}\text{H}_{15}\text{BrO}_3$  346.0205; Found 346.0205.

**(3,4-dihydro-2H-pyran-2-yl)methyl cyclobutanecarboxylate (4o)**

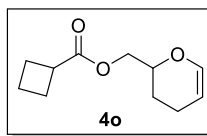

Following the **procedure D** on 5 mmol scale, colorless oil liquid, yield: 75% (0.74 g),  $R_f = 0.5$  (silica gel, PE: EtOAc = 10:1, v/v), column chromatography (silica gel, PE: EtOAc = 50:1, v/v).

$^1\text{H NMR}$  (500 MHz,  $\text{CDCl}_3$ )  $\delta$  6.34 (dt,  $J = 6.0, 1.9$  Hz, 1H), 4.68 (m, 1H), 4.21 – 4.10 (m, 2H), 4.05 – 3.97 (m, 1H), 3.17 (m, 1H), 2.33 – 2.23 (m, 2H), 2.23 – 2.14 (m, 2H), 2.13 – 2.04 (m, 1H), 2.01 – 1.78 (m, 4H), 1.71 – 1.60 (m, 1H).

$^{13}\text{C NMR}$  (126 MHz,  $\text{CDCl}_3$ )  $\delta$  175.30 (s), 143.27 (s), 100.39 (s), 72.71 (s), 65.90 (s), 37.88 (s), 25.19 (s), 25.18 (s), 24.14 (s), 19.08 (s), 18.33 (s).

**HRMS (EI):** [M] Calcd. for  $\text{C}_{11}\text{H}_{16}\text{O}_3$  196.1099; Found 196.1095.

**(8R,9S,13S,14S)-3-((3,4-dihydro-2H-pyran-2-yl)methoxy)-13-methyl-6,7,8,9,11,12,13,14,15,16-decahydro-17H-cyclopenta[a]phenanthren-17-one (4q)**

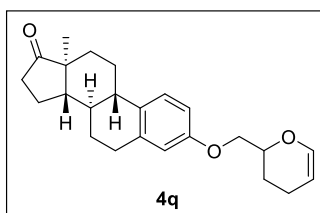

Following the **procedure C** on 5 mmol scale, white solid (m. p. = 104-106 °C), yield: 74% (1.35 g),  $R_f = 0.6$  (silica gel, PE: EtOAc = 5:1, v/v), column chromatography (silica gel, PE: EtOAc = 20:1, v/v).

$^1\text{H NMR}$  (500 MHz,  $\text{CDCl}_3$ )  $\delta$  7.55 – 7.48 (m, 2H), 6.96 – 6.88 (m, 2H), 6.34 (dt,  $J = 6.2, 2.0$  Hz, 1H), 4.69 (m, 1H), 4.16 (m, 1H), 4.11 – 3.98 (m, 2H), 2.10 (m, 1H), 2.03 – 1.87 (m, 2H), 1.75 (m, 1H).

$^{13}\text{C NMR}$  (126 MHz,  $\text{CDCl}_3$ )  $\delta$  220.14 (s), 156.37 (s), 143.12 (s), 137.30 (s), 131.92 (s), 125.92 (s), 114.27 (s), 111.77 (s), 100.17 (s), 72.83 (s), 69.65 (s), 49.95 (s), 47.52 (s), 43.53 (s), 37.94 (s), 35.43 (s), 31.21 (s), 29.25 (s), 26.15 (s), 25.54 (s), 24.18 (s), 21.19



(s), 18.86 (s), 13.45 (s).

**HRMS (EI):** [M] Calcd. for C<sub>24</sub>H<sub>30</sub>O<sub>3</sub> 366.2195; Found 366.2186.

**(3,4-dihydro-2H-pyran-2-yl)methyl 2-(4-isobutylphenyl)propanoate (4r)**

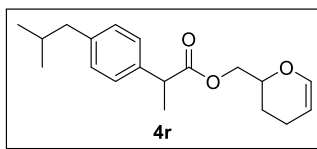

Following the **procedure D** on 5 mmol scale, colorless oil liquid, yield: 62% (0.94 g), Spectroscopic data are in agreement with those previously reported<sup>16</sup>.

**<sup>1</sup>H NMR (500 MHz, CDCl<sub>3</sub>)** δ 7.24 – 7.19 (m, 2H), 7.16 – 7.06 (m, 2H), 6.36 – 6.30 (m, 1H), 4.67 (m, 1H), 4.23 – 4.11 (m, 2H), 3.98 (m, 1H), 3.76 (m, 1H), 2.44 (d, J = 7.2 Hz, 2H), 2.03 (m, 1H), 1.94 (m, 1H), 1.84 (dt, J = 13.5, 6.8 Hz, 1H), 1.78 – 1.68 (m, 1H), 1.58 (m, 1H), 1.51 (d, J = 7.2 Hz, 3H), 0.89 (d, J = 6.6 Hz, 6H).

**(3,4-dihydro-2H-pyran-2-yl)methyl 2-(11-oxo-6,11-dihydrodibenzo[b,e]oxepin-3-yl)acetate (4s)**

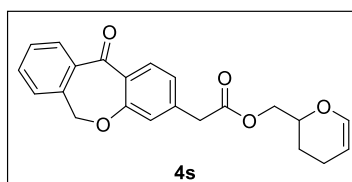

Following the **procedure D** on 5 mmol scale, colorless oil liquid, yield: 93% (1.61 g), R<sub>f</sub> = 0.5 (silica gel, PE: EtOAc = 10:1, v/v), column chromatography (silica gel, PE: EtOAc = 50:1, v/v).

**<sup>1</sup>H NMR (400 MHz, CDCl<sub>3</sub>)** δ 8.11 (s, 1H), 7.87 (d, J = 7.7 Hz, 1H), 7.59 – 7.31 (m, 4H), 7.01 (d, J = 8.4 Hz, 1H), 6.36 (d, J = 6.2 Hz, 1H), 5.16 (s, 2H), 4.70 (m, 1H), 4.21 (m, 2H), 4.10 – 3.96 (m, 1H), 3.69 (s, 2H), 2.16 – 1.89 (m, 2H), 1.81 (m, 1H), 1.72 – 1.57 (m, 1H).

**<sup>13</sup>C NMR (101 MHz, CDCl<sub>3</sub>)** δ 190.68 (s), 171.24 (s), 160.38 (s), 143.19 (s), 140.34 (s), 136.27 (s), 135.45 (s), 132.66 (s), 132.40 (s), 129.36 (s), 129.15 (s), 127.71 (s), 127.54 (s), 125.03 (s), 120.95 (s), 100.47 (s), 73.50 (s), 72.49 (s), 66.53 (s), 39.88 (s), 24.07 (s),

19.04 (s).

**HRMS (ESI):**  $[M+H]^+$  Calcd. for  $C_{22}H_{21}O_5^+$  365.1384; Found 365.1385.

## 6. Characterization of Products

### (E)-2-styryltetrahydro-2H-pyran (**3a**)

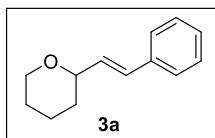

Following the **procedure E** on 0.2 mmol scale, colorless oil liquid, yield: 85% (32.0 mg). Spectroscopic data are in agreement with those previously reported<sup>17</sup>.

**<sup>1</sup>H NMR (500 MHz, CDCl<sub>3</sub>)**  $\delta$  7.42 – 7.36 (m, 2H), 7.31 (t,  $J = 7.6$  Hz, 2H), 7.23 (m, 1H), 6.60 (d,  $J = 16.0$  Hz, 1H), 6.23 (dd,  $J = 16.0, 5.8$  Hz, 1H), 4.12 – 4.05 (m, 1H), 3.98 (m, 1H), 3.56 (td,  $J = 11.5, 2.3$  Hz, 1H), 1.90 (m, 1H), 1.78 – 1.71 (m, 1H), 1.68 – 1.46 (m, 4H).

**<sup>13</sup>C NMR (126 MHz, CDCl<sub>3</sub>)**  $\delta$  136.95 (s), 130.77 (s), 129.67 (s), 128.41 (s), 127.37 (s), 126.35 (s), 77.97 (s), 68.36 (s), 32.17 (s), 25.80 (s), 23.37 (s).

### (E)-2-(4-methylstyryl)tetrahydro-2H-pyran (**3b**)

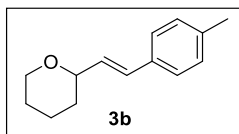

Following the **procedure E** on 0.2 mmol scale, colorless oil liquid, yield: 87% (35.2 mg),  $R_f = 0.6$  (silica gel, PE: EtOAc = 10:1, v/v), column chromatography (silica gel, PE: EtOAc = 80:1, v/v).

**<sup>1</sup>H NMR (500 MHz, CDCl<sub>3</sub>)**  $\delta$  7.30 (d,  $J = 7.7$  Hz, 2H), 7.12 (d,  $J = 7.7$  Hz, 2H), 6.58 (d,  $J = 16.0$  Hz, 1H), 6.19 (dd,  $J = 16.0, 5.7$  Hz, 1H), 4.12 – 4.06 (m, 1H), 4.01 – 3.94 (m, 1H), 3.56 (t,  $J = 11.4$  Hz, 1H), 2.34 (s, 3H), 1.90 (d,  $J = 10.0$  Hz, 1H), 1.75 (d,  $J =$

12.6 Hz, 1H), 1.69 – 1.46 (m, 4H).

<sup>13</sup>C NMR (126 MHz, CDCl<sub>3</sub>) δ 137.07 (s), 134.11 (s), 129.67 (s), 129.61 (s), 129.08 (s), 126.22 (s), 78.03 (s), 68.29 (s), 32.15 (s), 25.78 (s), 23.34 (s), 21.07 (s).

HRMS (EI): [M] Calcd. for C<sub>14</sub>H<sub>18</sub>O 202.1358; Found 202.1351.

**(E)-2-(4-(tert-butyl)styryl)tetrahydro-2H-pyran (3c)**

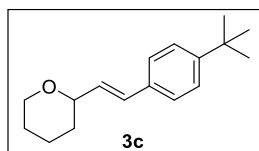

Following the **procedure E** on 0.2 mmol scale, colorless oil liquid, yield: 86% (42.0 mg), R<sub>f</sub> = 0.6 (silica gel, PE: EtOAc = 10:1, v/v), column chromatography (silica gel, PE: EtOAc = 80:1, v/v).

<sup>1</sup>H NMR (500 MHz, CDCl<sub>3</sub>) δ 7.35 (s, 4H), 6.59 (dd, J = 16.0, 1.1 Hz, 1H), 6.20 (dd, J = 16.0, 5.8 Hz, 1H), 4.13 – 4.06 (m, 1H), 4.02 – 3.96 (m, 1H), 3.56 (td, J = 11.5, 2.2 Hz, 1H), 1.91 (m, 1H), 1.78 – 1.72 (m, 1H), 1.72 – 1.44 (m, 4H), 1.34 (s, 9H).

<sup>13</sup>C NMR (126 MHz, CDCl<sub>3</sub>) δ 150.36 (s), 134.16 (s), 130.02 (s), 129.39 (s), 126.04 (s), 125.32 (s), 78.06 (s), 68.32 (s), 34.45 (s), 32.24 (s), 31.22 (s), 25.80 (s), 23.37 (s).

HRMS (EI): [M] Calcd. for C<sub>17</sub>H<sub>24</sub>O 244.1827; Found 244.1823.

**(E)-2-(4-methoxystyryl)tetrahydro-2H-pyran (3d)**

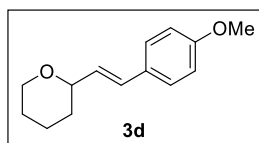

Following the **procedure E** on 0.2 mmol scale, colorless oil liquid, yield: 71% (31.0 mg). Spectroscopic data are in agreement with those previously reported<sup>17</sup>.

<sup>1</sup>H NMR (500 MHz, CDCl<sub>3</sub>) δ 7.34 – 7.28 (m, 2H), 6.87 – 6.80 (m, 2H), 6.53 (d, J = 15.9 Hz, 1H), 6.08 (dd, J = 16.0, 6.0 Hz, 1H), 4.09 – 4.03 (m, 1H), 3.98 – 3.90 (m, 1H), 3.80 (s, 3H), 3.54 (td, J = 11.5, 2.4 Hz, 1H), 1.89 (m, 1H), 1.73 (m, 1H), 1.67 – 1.45 (m, 4H).

<sup>13</sup>C NMR (126 MHz, CDCl<sub>3</sub>) δ 159.05 (s), 129.72 (s), 129.37 (s), 128.61 (s), 127.54 (s),

113.85 (s), 78.21 (s), 68.39 (s), 55.22 (s), 32.26 (s), 25.84 (s), 23.41 (s).

**(E)-2-(2-([1,1'-biphenyl]-4-yl)vinyl)tetrahydro-2H-pyran (3e)**

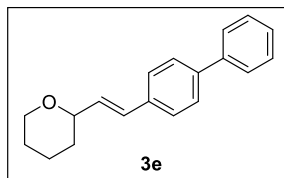

Following the **procedure E** on 0.2 mmol scale, white solid (m. p. = 71 - 72 °C), yield: 53% (28.0 mg),  $R_f = 0.5$  (silica gel, PE: EtOAc = 10:1, v/v), column chromatography (silica gel, PE: EtOAc = 80:1, v/v).

$^1\text{H NMR}$  (500 MHz,  $\text{CDCl}_3$ )  $\delta$  7.59 (m, 4H), 7.46 (m, 4H), 7.39 – 7.32 (m, 1H), 6.66 (d,  $J = 16.0$  Hz, 1H), 6.29 (dd,  $J = 16.0, 5.8$  Hz, 1H), 4.11 (m, 1H), 4.05 – 3.98 (m, 1H), 3.58 (td,  $J = 11.6, 2.4$  Hz, 1H), 1.92 (m, 1H), 1.82 – 1.75 (m, 1H), 1.73 – 1.44 (m, 4H).

$^{13}\text{C NMR}$  (126 MHz,  $\text{CDCl}_3$ )  $\delta$  140.66 (s), 140.09 (s), 136.02 (s), 130.90 (s), 129.18 (s), 128.69 (s), 127.17 (s), 127.12 (s), 126.84 (s), 126.78 (s), 77.98 (s), 68.38 (s), 32.20 (s), 25.81 (s), 23.38 (s).

**HRMS (EI):** [M] Calcd. for  $\text{C}_{19}\text{H}_{20}\text{O}$  264.1514; Found 264.1506.

**(E)-2-(4-(trifluoromethoxy)styryl)tetrahydro-2H-pyran (3f)**

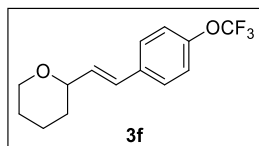

Following the **procedure E** on 0.2 mmol scale, colorless oil liquid, yield: 91% (49.5 mg),  $R_f = 0.6$  (silica gel, PE: EtOAc = 10:1, v/v), column chromatography (silica gel, PE: EtOAc = 80:1, v/v).

$^1\text{H NMR}$  (500 MHz,  $\text{CDCl}_3$ )  $\delta$  7.41 – 7.35 (m, 2H), 7.14 (d,  $J = 8.2$  Hz, 2H), 6.60 – 6.54 (m, 1H), 6.19 (dd,  $J = 16.0, 5.6$  Hz, 1H), 4.10 – 4.04 (m, 1H), 3.97 (m, 1H), 3.54 (td,  $J = 11.5, 2.3$  Hz, 1H), 1.89 (m, 1H), 1.77 – 1.70 (m, 1H), 1.66 – 1.41 (m, 4H).

$^{13}\text{C NMR}$  (126 MHz,  $\text{CDCl}_3$ )  $\delta$  148.36 (s), 135.80 (s), 131.90 (s), 128.09 (s), 127.56 (s), 120.96 (s), 77.73 (s), 68.42 (s), 32.16 (s), 25.79 (s), 23.37 (s).

$^{19}\text{F}$  NMR (471 MHz,  $\text{CDCl}_3$ )  $\delta$  -57.79 (s).

HRMS (EI): [M] Calcd. for  $\text{C}_{14}\text{H}_{15}\text{F}_3\text{O}_2$  272.1024; Found 272.1017.

**(E)-2-(4-fluorostyryl)tetrahydro-2H-pyran (3g)**

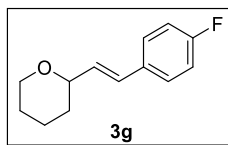

Following the **procedure E** on 0.2 mmol scale, colorless oil liquid, yield: 96% (39.6 mg). Spectroscopic data are in agreement with those previously reported<sup>19</sup>.

$^1\text{H}$  NMR (500 MHz,  $\text{CDCl}_3$ )  $\delta$  7.33 (m, 2H), 7.01 – 6.94 (m, 2H), 6.55 (d,  $J$  = 16.0 Hz, 1H), 6.12 (dd,  $J$  = 16.0, 5.8 Hz, 1H), 4.09 – 4.03 (m, 1H), 3.99 – 3.91 (m, 1H), 3.53 (td,  $J$  = 11.5, 2.3 Hz, 1H), 1.88 (m, 1H), 1.72 (dt,  $J$  = 12.7, 2.3 Hz, 1H), 1.67 – 1.43 (m, 4H).

$^{13}\text{C}$  NMR (126 MHz,  $\text{CDCl}_3$ )  $\delta$  163.13 (s), 161.17 (s), 133.09 (d,  $J$  = 3.3 Hz), 130.50 (s), 128.51 (s), 127.81 (d,  $J$  = 7.7 Hz), 115.29 (d,  $J$  = 21.6 Hz), 77.84 (s), 68.36 (s), 32.14 (s), 25.77 (s), 23.34 (s).

$^{19}\text{F}$  NMR (471 MHz,  $\text{CDCl}_3$ )  $\delta$  -114.68 (s).

**(E)-2-(4-chlorostyryl)tetrahydro-2H-pyran (3h)**

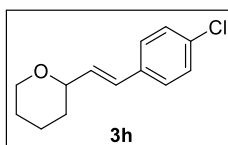

Following the **procedure E** on 0.2 mmol scale, white solid, yield: 81% (36.1 mg). Spectroscopic data are in agreement with those previously reported<sup>17</sup>.

$^1\text{H}$  NMR (500 MHz,  $\text{CDCl}_3$ )  $\delta$  7.32 – 7.21 (m, 4H), 6.56 – 6.49 (m, 1H), 6.17 (dd,  $J$  = 16.0, 5.7 Hz, 1H), 4.08 – 4.02 (m, 1H), 3.94 (m, 1H), 3.52 (td,  $J$  = 11.5, 2.3 Hz, 1H), 1.87 (m, 1H), 1.71 (m, 1H), 1.68 – 1.37 (m, 4H).

$^{13}\text{C}$  NMR (126 MHz,  $\text{CDCl}_3$ )  $\delta$  135.46 (s), 132.92 (s), 131.43 (s), 128.56 (s), 128.35 (s), 127.53 (s), 77.72 (s), 68.37 (s), 32.09 (s), 25.76 (s), 23.33 (s).

**(E)-2-(4-bromostyryl)tetrahydro-2H-pyran (3i)**

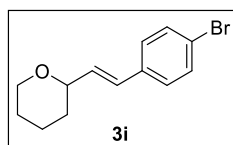

Following the **procedure E** on 0.2 mmol scale, white solid, yield: 67% (35.8 mg). Spectroscopic data are in agreement with those previously reported<sup>20</sup>.

**<sup>1</sup>H NMR (500 MHz, CDCl<sub>3</sub>)** δ 7.41 (m, 2H), 7.26 – 7.20 (m, 2H), 6.55 – 6.48 (m, 1H), 6.19 (dd, *J* = 16.0, 5.7 Hz, 1H), 4.09 – 4.03 (m, 1H), 3.95 (m, 1H), 3.53 (td, *J* = 11.5, 2.2 Hz, 1H), 1.89 (dt, *J* = 9.7, 2.6 Hz, 1H), 1.72 (dt, *J* = 13.0, 2.3 Hz, 1H), 1.68 – 1.36 (m, 4H).

**<sup>13</sup>C NMR (126 MHz, CDCl<sub>3</sub>)** δ 135.91 (s), 131.57 (s), 131.51 (s), 128.39 (s), 127.87 (s), 121.07 (s), 77.71 (s), 68.37 (s), 32.07 (s), 25.76 (s), 23.34 (s).

**(E)-2-(3-methoxystyryl)tetrahydro-2H-pyran (3j)**

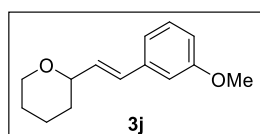

Following the **procedure E** on 0.2 mmol scale, colorless oil liquid, yield: 82% (35.8 mg). Spectroscopic data are in agreement with those previously reported<sup>20</sup>.

**<sup>1</sup>H NMR (500 MHz, CDCl<sub>3</sub>)** δ 7.22 (t, *J* = 7.9 Hz, 1H), 6.98 (d, *J* = 7.7 Hz, 1H), 6.95 – 6.91 (m, 1H), 6.78 (dd, *J* = 8.0, 2.2 Hz, 1H), 6.60 – 6.53 (m, 1H), 6.22 (dd, *J* = 16.0, 5.7 Hz, 1H), 4.07 (m, 1H), 4.01 – 3.94 (m, 1H), 3.80 (s, 3H), 3.54 (td, *J* = 11.5, 2.4 Hz, 1H), 1.89 (m, 1H), 1.80 – 1.71 (m, 1H), 1.70 – 1.42 (m, 4H).

**<sup>13</sup>C NMR (126 MHz, CDCl<sub>3</sub>)** δ 159.63 (s), 138.39 (s), 131.07 (s), 129.48 (s), 129.34 (s), 119.01 (s), 113.09 (s), 111.45 (s), 77.83 (s), 68.31 (s), 55.04 (s), 32.12 (s), 25.76 (s), 23.33 (s).

**(E)-2-(2-methoxystyryl)tetrahydro-2H-pyran (3k)**

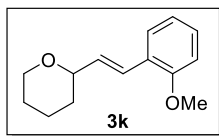

Following the **procedure E** on 0.2 mmol scale, colorless oil liquid, yield: 51% (22.2 mg),  $R_f = 0.45$  (silica gel, PE: EtOAc = 10:1, v/v), column chromatography (silica gel, PE: EtOAc = 80:1, v/v).

**$^1\text{H}$  NMR (500 MHz,  $\text{CDCl}_3$ )**  $\delta$  7.44 (dd,  $J = 7.6, 1.6$  Hz, 1H), 7.24 – 7.17 (m, 1H), 6.94 – 6.88 (m, 2H), 6.85 (d,  $J = 8.5$  Hz, 1H), 6.23 (dd,  $J = 16.2, 6.1$  Hz, 1H), 4.07 (m, 1H), 4.02 – 3.94 (m, 1H), 3.83 (s, 3H), 3.54 (td,  $J = 11.5, 2.3$  Hz, 1H), 1.89 (m, 1H), 1.79 – 1.72 (m, 1H), 1.70 – 1.43 (m, 4H).

**$^{13}\text{C}$  NMR (126 MHz,  $\text{CDCl}_3$ )**  $\delta$  156.72 (s), 131.41 (s), 128.44 (s), 126.79 (s), 125.93 (s), 124.80 (s), 120.52 (s), 110.71 (s), 78.58 (s), 68.35 (s), 55.35 (s), 32.22 (s), 25.85 (s), 23.42 (s).

**HRMS (EI):** [M] Calcd. for  $\text{C}_{14}\text{H}_{18}\text{O}_2$  218.1307; Found 218.1301.

**(E)-2-(2-(naphthalen-1-yl)vinyl)tetrahydro-2H-pyran (3l)**

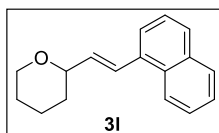

Following the **procedure E** on 0.2 mmol scale, colorless oil liquid, yield: 79% (37.6 mg),  $R_f = 0.5$  (silica gel, PE: EtOAc = 10:1, v/v), column chromatography (silica gel, PE: EtOAc = 80:1, v/v).

**$^1\text{H}$  NMR (500 MHz,  $\text{CDCl}_3$ )**  $\delta$  8.19 (d,  $J = 8.1$  Hz, 1H), 7.91 – 7.83 (m, 1H), 7.79 (d,  $J = 8.1$  Hz, 1H), 7.64 (d,  $J = 7.0$  Hz, 1H), 7.57 – 7.46 (m, 3H), 7.39 (d,  $J = 15.7$  Hz, 1H), 6.29 (dd,  $J = 15.7, 5.7$  Hz, 1H), 4.19 – 4.07 (m, 2H), 3.62 (td,  $J = 11.6, 2.3$  Hz, 1H), 1.99 – 1.89 (m, 1H), 1.88 – 1.78 (m, 1H), 1.74 – 1.54 (m, 4H).

**$^{13}\text{C}$  NMR (126 MHz,  $\text{CDCl}_3$ )**  $\delta$  134.77 (s), 134.05 (s), 133.50 (s), 131.15 (s), 128.37 (s), 127.70 (s), 126.84 (s), 125.80 (s), 125.60 (s), 125.53 (s), 123.88 (s), 123.72 (s), 78.12 (s), 68.37 (s), 32.27 (s), 25.81 (s), 23.38 (s).

**HRMS (EI):** [M] Calcd. for C<sub>17</sub>H<sub>18</sub>O 238.1358; Found 238.1356.

**(E)-2-(2-(thiophen-2-yl)vinyl)tetrahydro-2H-pyran (3m)**

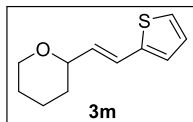

Following the **procedure E** on 0.2 mmol scale, colorless oil liquid, yield: 83% (32.2 mg), R<sub>f</sub> = 0.6 (silica gel, PE: EtOAc = 10:1, v/v), column chromatography (silica gel, PE: EtOAc = 80:1, v/v).

**<sup>1</sup>H NMR (500 MHz, CDCl<sub>3</sub>)** δ 7.16 – 7.10 (m, 1H), 6.94 (m, 2H), 6.71 (d, J = 15.7 Hz, 1H), 6.05 (dd, J = 15.8, 5.7 Hz, 1H), 4.06 (m, 1H), 3.93 (m, 1H), 3.52 (td, J = 11.4, 2.3 Hz, 1H), 1.88 (m, 1H), 1.82 – 1.69 (m, 1H), 1.68 – 1.39 (m, 4H).

**<sup>13</sup>C NMR (126 MHz, CDCl<sub>3</sub>)** δ 142.19 (s), 130.39 (s), 127.22 (s), 125.57 (s), 124.00 (s), 122.92 (s), 77.56 (s), 68.36 (s), 32.09 (s), 25.80 (s), 23.35 (s).

**HRMS (EI):** [M] Calcd. for C<sub>11</sub>H<sub>14</sub>OS 194.0765; Found 194.0763.

**(E)-2-(2-(thiophen-3-yl)vinyl)tetrahydro-2H-pyran (3n)**

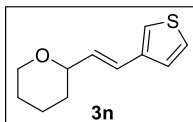

Following the **procedure E** on 0.2 mmol scale, colorless oil liquid, yield: 88% (34.2 mg), R<sub>f</sub> = 0.6 (silica gel, PE: EtOAc = 10:1, v/v), column chromatography (silica gel, PE: EtOAc = 80:1, v/v).

**<sup>1</sup>H NMR (500 MHz, CDCl<sub>3</sub>)** δ 7.24 (dd, J = 5.1, 2.9 Hz, 1H), 7.20 (dd, J = 5.1, 1.1 Hz, 1H), 7.13 (m, 1H), 6.59 (d, J = 16.0 Hz, 1H), 6.07 (dd, J = 16.0, 5.9 Hz, 1H), 4.06 (m, 1H), 3.93 (m, 1H), 3.53 (td, J = 11.5, 2.4 Hz, 1H), 1.88 (m, 1H), 1.76 – 1.61 (m, 1H), 1.66 – 1.40 (m, 4H).

**<sup>13</sup>C NMR (126 MHz, CDCl<sub>3</sub>)** δ 139.57 (s), 130.65 (s), 125.82 (s), 124.94 (s), 123.96 (s), 121.94 (s), 77.84 (s), 68.33 (s), 32.14 (s), 25.80 (s), 23.35 (s).

**HRMS (EI):** [M] Calcd. for C<sub>11</sub>H<sub>14</sub>OS 194.0765; Found 194.0758.



**(E)-2-(2-cyclopropylvinyl)tetrahydro-2H-pyran (3o)**

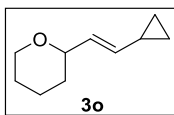

Following the **procedure E** on 0.2 mmol scale, colorless oil liquid, yield: 44% (17.3 mg),  $R_f = 0.7$  (silica gel, PE: EtOAc = 10:1, v/v), column chromatography (silica gel, PE: EtOAc = 80:1, v/v).

**$^1\text{H}$  NMR (500 MHz,  $\text{CDCl}_3$ )**  $\delta$  5.54 (dd,  $J = 15.4, 6.3$  Hz, 1H), 5.24 – 5.15 (m, 1H), 4.02 – 3.95 (m, 1H), 3.75 – 3.68 (m, 1H), 3.46 (td,  $J = 11.5, 2.2$  Hz, 1H), 1.83 (m, 1H), 1.67 – 1.55 (m, 2H), 1.54 – 1.44 (m, 2H), 1.42 – 1.32 (m, 2H), 0.74 – 0.63 (m, 2H), 0.36 (m, 2H).

**$^{13}\text{C}$  NMR (126 MHz,  $\text{CDCl}_3$ )**  $\delta$  135.51 (s), 128.80 (s), 78.08 (s), 68.32 (s), 32.19 (s), 25.84 (s), 23.42 (s), 13.47 (s), 6.65 (s).

**HRMS (EI):** [M] Calcd. for  $\text{C}_{10}\text{H}_{16}\text{O}$  152.1201; Found 152.1192.

**(E)-2-(dec-1-en-1-yl)tetrahydro-2H-pyran (3p)**

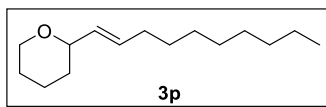

Following the **procedure E** on 0.2 mmol scale, colorless oil liquid, yield: 36% (16.2 mg),  $R_f = 0.7$  (silica gel, PE: EtOAc = 10:1, v/v), column chromatography (silica gel, PE: EtOAc = 80:1, v/v).

**$^1\text{H}$  NMR (500 MHz,  $\text{CDCl}_3$ )**  $\delta$  5.66 (m, 1H), 5.45 (m, 1H), 3.99 (m, 1H), 3.76 – 3.69 (m, 1H), 3.46 (td,  $J = 11.6, 2.3$  Hz, 1H), 2.05 – 1.94 (m, 2H), 1.86 – 1.79 (m, 1H), 1.64 – 1.44 (m, 4H), 1.43 – 1.31 (m, 3H), 1.26 (m, 10H), 0.87 (t,  $J = 7.0$  Hz, 3H).

**$^{13}\text{C}$  NMR (126 MHz,  $\text{CDCl}_3$ )**  $\delta$  131.96 (s), 131.10 (s), 78.28 (s), 68.30 (s), 32.31 (s), 32.18 (s), 31.85 (s), 29.42 (s), 29.23 (s), 29.18 (s), 29.08 (s), 25.85 (s), 23.40 (s), 22.63 (s), 14.06 (s).

**HRMS (EI):** [M] Calcd. for  $\text{C}_{15}\text{H}_{28}\text{O}$  224.2140; Found 224.2150.

### (E)-2-(6-chlorohex-1-en-1-yl)tetrahydro-2H-pyran (3q)

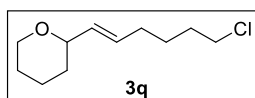

Following the **procedure E** on 0.2 mmol scale, colorless oil liquid, yield: 39% (15.8 mg),  $R_f = 0.7$  (silica gel, PE: EtOAc = 10:1, v/v), column chromatography (silica gel, PE: EtOAc = 80:1, v/v).

$^1\text{H NMR}$  (500 MHz,  $\text{CDCl}_3$ )  $\delta$  5.64 (m, 1H), 5.48 (m, 1H), 3.99 (m, 1H), 3.77 – 3.70 (m, 1H), 3.52 (t,  $J = 6.7$  Hz, 2H), 3.46 (td,  $J = 11.6, 2.4$  Hz, 1H), 2.05 (q,  $J = 7.7$  Hz, 2H), 1.86 – 1.80 (m, 1H), 1.80 – 1.70 (m, 2H), 1.64 – 1.57 (m, 1H), 1.56 – 1.45 (m, 5H), 1.42 – 1.31 (m, 1H).

$^{13}\text{C NMR}$  (126 MHz,  $\text{CDCl}_3$ )  $\delta$  131.88 (s), 130.74 (s), 78.05 (s), 68.30 (s), 44.91 (s), 32.11 (s), 31.95 (s), 31.43 (s), 26.19 (s), 25.78 (s), 23.33 (s).

**HRMS (ESI):**  $[\text{M}+\text{H}]^+$  Calcd. for  $\text{C}_{11}\text{H}_{20}\text{ClO}^+$  203.1198; Found 203.1199.

### 2-(4-methoxyphenyl)tetrahydro-2H-pyran (3r)

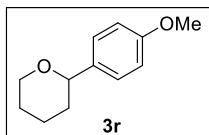

Following the **procedure E** on 0.2 mmol scale, colorless oil liquid, yield: 60% (23.0 mg). Spectroscopic data are in agreement with those previously reported<sup>21</sup>.

$^1\text{H NMR}$  (500 MHz,  $\text{CDCl}_3$ )  $\delta$  7.31 – 7.24 (m, 1H), 6.87 (d,  $J = 9.0$  Hz, 1H), 4.30 – 4.24 (m, 1H), 4.15 – 4.09 (m, 1H), 3.79 (s, 3H), 3.61 (td,  $J = 11.7, 2.5$  Hz, 1H), 1.94 (m, 1H), 1.85 – 1.67 (m, 1H), 1.70 – 1.52 (m, 4H).

$^{13}\text{C NMR}$  (126 MHz,  $\text{CDCl}_3$ )  $\delta$  158.80 (s), 135.57 (s), 127.13 (s), 113.62 (s), 79.77 (s), 69.04 (s), 55.25 (s), 33.83 (s), 25.88 (s), 24.01 (s).

### (E)-4-((6-styryltetrahydro-2H-pyran-2-yl)methoxy)benzonitrile (5a)

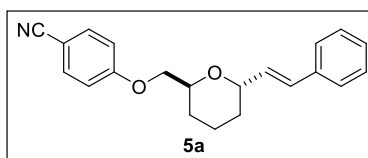

Following the **procedure E** on 0.2 mmol scale, colorless oil liquid, yield: 47% (30.0 mg),  $R_f = 0.6$  (silica gel, PE: EtOAc = 10:1, v/v), column chromatography (silica gel, PE: EtOAc = 80:1, v/v).

d.r. = 5.56:1

**$^1\text{H}$  NMR (500 MHz,  $\text{CDCl}_3$ )**  $\delta$  7.59 – 7.53 (m, 2H), 7.43 – 7.29 (m, 4H), 7.27 – 7.22 (m, 1H), 7.00 – 6.95 (m, 2H), 6.60 (dd,  $J = 16.3, 1.9$  Hz, 1H), 6.32 (dd,  $J = 16.3, 4.8$  Hz, 1H), 4.65 (m, 1H), 4.21 – 4.13 (m, 1H), 4.12 – 3.92 (m, 2H), 1.97 – 1.86 (m, 1H), 1.83 – 1.66 (m, 4H), 1.62 – 1.50 (m, 1H).

**$^{13}\text{C}$  NMR (126 MHz,  $\text{CDCl}_3$ )**  $\delta$  162.11 (s), 136.71 (s), 133.87 (s), 131.77 (s), 129.14 (s), 128.53 (s), 127.61 (s), 126.28 (s), 119.15 (s), 115.31 (s), 103.97 (s), 72.82 (s), 70.83 (s), 68.95 (s), 28.95 (s), 27.41 (s), 18.52 (s).

**HRMS (EI):** [M] Calcd. for  $\text{C}_{21}\text{H}_{21}\text{NO}_2$  319.1572.; Found 319.1572.

**(E)-2-((4-ethylphenoxy)methyl)-6-styryltetrahydro-2H-pyran (5b)**

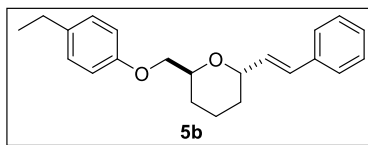

Following the **procedure E** on 0.2 mmol scale, colorless oil liquid, yield: 63% (30.0 mg),  $R_f = 0.6$  (silica gel, PE: EtOAc = 10:1, v/v), column chromatography (silica gel, PE: EtOAc = 80:1, v/v).

d.r. = 5.00:1

**$^1\text{H}$  NMR (500 MHz,  $\text{CDCl}_3$ )**  $\delta$  7.42 – 7.37 (m, 2H), 7.33 (m, 2H), 7.24 (m, 1H), 7.14 – 7.09 (m, 2H), 6.91 – 6.85 (m, 2H), 6.61 (dd,  $J = 16.3, 1.9$  Hz, 1H), 6.35 (dd,  $J = 16.2, 4.8$  Hz, 1H), 4.66 (m, 1H), 4.18 (m, 1H), 4.02 (m, 2H), 2.60 (q,  $J = 7.6$  Hz, 2H), 1.91 (m, 1H), 1.81 – 1.73 (m, 4H), 1.63 – 1.53 (m, 1H), 1.22 (t,  $J = 7.6$  Hz, 3H).

**$^{13}\text{C}$  NMR (126 MHz,  $\text{CDCl}_3$ )**  $\delta$  156.89 (s), 136.91 (s), 136.49 (s), 131.44 (s), 129.65 (s), 128.61 (s), 128.50 (s), 127.48 (s), 126.34 (s), 114.54 (s), 72.72 (s), 70.42 (s), 69.40 (s), 29.32 (s), 27.92 (s), 27.55 (s), 18.64 (s), 15.82 (s).

**HRMS (EI):** [M] Calcd. for  $\text{C}_{22}\text{H}_{26}\text{O}_2$  322.1933.; Found 322.1927.

**(E)-2-((benzyloxy)methyl)-6-styryltetrahydro-2H-pyran (5c)**

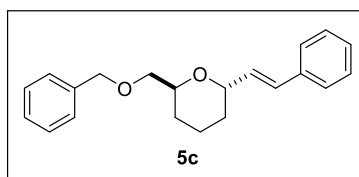

Following the **procedure E** on 0.2 mmol scale, colorless oil liquid, yield: 92% (56.7 mg),  $R_f = 0.6$  (silica gel, PE: EtOAc = 10:1, v/v), column chromatography (silica gel, PE: EtOAc = 80:1, v/v).

d.r. = 3.67:1

$^1\text{H NMR}$  (500 MHz,  $\text{CDCl}_3$ )  $\delta$  7.51 – 7.19 (m, 10H), 6.60 (dd,  $J = 16.2, 1.2$  Hz, 1H), 6.35 (dd,  $J = 16.3, 4.9$  Hz, 1H), 4.65 – 4.55 (m, 3H), 4.04 (m, 1H), 3.59 (dd,  $J = 10.0, 6.2$  Hz, 1H), 3.48 (dd,  $J = 10.0, 4.7$  Hz, 1H), 1.93 – 1.82 (m, 1H), 1.79 – 1.61 (m, 4H), 1.49 (m, 1H).

$^{13}\text{C NMR}$  (126 MHz,  $\text{CDCl}_3$ )  $\delta$  138.38 (s), 136.95 (s), 131.20 (s), 129.90 (s), 128.47 (s), 128.28 (s), 127.59 (s), 127.47 (s), 127.42 (s), 126.31 (s), 73.22 (s), 72.51 (s), 72.49 (s), 70.19 (s), 29.33 (s), 27.50 (s), 18.67 (s).

**HRMS (EI):** [M] Calcd. for  $\text{C}_{21}\text{H}_{24}\text{O}_2$  308.1776.; Found 308.1779.

**(E)-2-(methoxymethyl)-6-styryltetrahydro-2H-pyran (5d)**

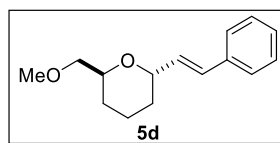

Following the **procedure E** on 0.2 mmol scale, colorless oil liquid, yield: 88% (40.8 mg),  $R_f = 0.6$  (silica gel, PE: EtOAc = 10:1, v/v), column chromatography (silica gel, PE: EtOAc = 80:1, v/v).

d.r. = 4.00:1

$^1\text{H NMR}$  (500 MHz,  $\text{CDCl}_3$ )  $\delta$  7.42 – 7.37 (m, 2H), 7.31 (m, 2H), 7.28 – 7.20 (m, 1H), 6.58 (dd,  $J = 16.2, 1.8$  Hz, 1H), 6.36 (dd,  $J = 16.3, 4.8$  Hz, 1H), 4.63 (m, 1H), 3.97 (m, 1H), 3.48 (m, 1H), 3.39 (s, 3H), 3.39 – 3.35 (m, 1H), 1.89 (m, 1H), 1.73 (m, 3H), 1.64 –

1.56 (m, 1H), 1.51 – 1.40 (m, 1H).

$^{13}\text{C}$  NMR (126 MHz,  $\text{CDCl}_3$ )  $\delta$  136.97 (s), 131.36 (s), 129.80 (s), 128.49 (s), 127.45 (s), 126.33 (s), 75.51 (s), 72.66 (s), 69.84 (s), 59.19 (s), 29.05 (s), 27.47 (s), 18.66 (s).

HRMS (EI): [M] Calcd. for  $\text{C}_{15}\text{H}_{20}\text{O}_2$  232.1463; Found 232.1462.

**(E)-2-(((4-methylbenzyl)oxy)methyl)-6-styryltetrahydro-2H-pyran (5e)**

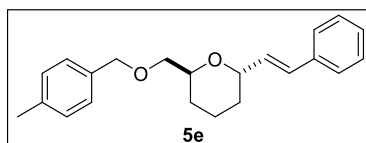

Following the **procedure E** on 0.2 mmol scale, colorless oil liquid, yield: 68% (43.9 mg),  $R_f$  = 0.6 (silica gel, PE: EtOAc = 10:1, v/v), column chromatography (silica gel, PE: EtOAc = 80:1, v/v).

d.r. = 4.81:1

$^1\text{H}$  NMR (500 MHz,  $\text{CDCl}_3$ )  $\delta$  7.45 – 7.37 (m, 2H), 7.32 (m, 2H), 7.27 – 7.21 (m, 3H), 7.16 (d,  $J$  = 7.7 Hz, 2H), 6.60 (dd,  $J$  = 16.3, 1.8 Hz, 1H), 6.35 (dd,  $J$  = 16.2, 4.9 Hz, 1H), 4.66 – 4.47 (m, 3H), 4.02 (m, 1H), 3.65 – 3.32 (m, 2H), 2.35 (s, 3H), 1.92 – 1.82 (m, 1H), 1.76 – 1.60 (m, 4H), 1.55 – 1.42 (m, 1H).

$^{13}\text{C}$  NMR (126 MHz,  $\text{CDCl}_3$ )  $\delta$  137.13 (s), 136.96 (s), 135.28 (s), 131.17 (s), 129.92 (s), 128.96 (s), 128.46 (s), 127.72 (s), 127.41 (s), 126.31 (s), 73.08 (s), 72.49 (s), 72.26 (s), 70.20 (s), 29.32 (s), 27.48 (s), 21.10 (s), 18.65 (s).

HRMS (ESI):  $[\text{M}+\text{H}]^+$  Calcd. for  $\text{C}_{22}\text{H}_{27}\text{O}_2^+$  323.2006.; Found 323.2008.

**(E)-2-(((1,1'-biphenyl)-4-ylmethoxy)methyl)-6-styryltetrahydro-2H-pyran (5f)**

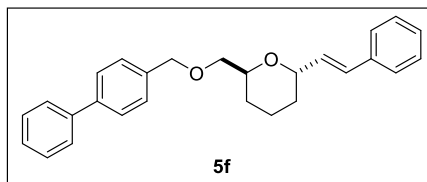

Following the **procedure E** on 0.2 mmol scale, colorless oil liquid, yield: 89% (68.4 mg),  $R_f$  = 0.5 (silica gel, PE: EtOAc = 10:1, v/v), column chromatography (silica gel, PE: EtOAc = 80:1, v/v).

d.r. = 5.07:1

**<sup>1</sup>H NMR (500 MHz, CDCl<sub>3</sub>)** δ 7.61 – 7.54 (m, 4H), 7.47 – 7.37 (m, 6H), 7.36 – 7.28 (m, 3H), 7.26 – 7.20 (m, 1H), 6.59 (dd, J = 16.2, 1.9 Hz, 1H), 6.35 (ddd, J = 16.3, 4.9, 1.4 Hz, 1H), 4.61 (m, 3H), 4.03 (m, 1H), 3.70 – 3.45 (m, 2H), 1.86 (m, 1H), 1.78 – 1.62 (m, 4H), 1.50 (m, 1H).

**<sup>13</sup>C NMR (126 MHz, CDCl<sub>3</sub>)** δ 140.92 (s), 140.47 (s), 137.47 (s), 136.99 (s), 131.27 (s), 129.93 (s), 128.73 (s), 128.52 (s), 128.10 (s), 127.47 (s), 127.22 (s), 127.10 (s), 127.07 (s), 126.35 (s), 73.00 (s), 72.59 (s), 70.26 (s), 29.35 (s), 27.55 (s), 18.70 (s).

**HRMS (EI):** [M] Calcd. for C<sub>27</sub>H<sub>28</sub>O<sub>2</sub> 384.2089.; Found 384.2090.

**(E)-2-(((2-methylbenzyl)oxy)methyl)-6-styryltetrahydro-2H-pyran (5g)**

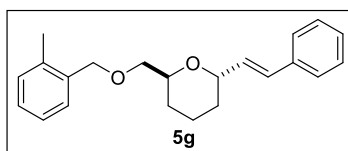

Following the **procedure E** on 0.2 mmol scale, colorless oil liquid, yield: 83% (52.5 mg), R<sub>f</sub> = 0.6 (silica gel, PE: EtOAc = 10:1, v/v), column chromatography (silica gel, PE: EtOAc = 80:1, v/v).

d.r. = 3.36:1

**<sup>1</sup>H NMR (500 MHz, CDCl<sub>3</sub>)** δ 7.40 (d, J = 7.6 Hz, 2H), 7.33 (q, J = 7.9, 7.4 Hz, 3H), 7.27 – 7.14 (m, 4H), 6.60 (d, J = 16.2 Hz, 1H), 6.34 (dd, J = 16.3, 4.9 Hz, 1H), 4.59 (m, 3H), 4.04 (m, 1H), 3.56 (m, 2H), 2.35 (s, 3H), 1.92 – 1.83 (m, 1H), 1.78 – 1.62 (m, 4H), 1.50 (m, 1H).

**<sup>13</sup>C NMR (101 MHz, CDCl<sub>3</sub>)** δ 136.97 (s), 136.65 (s), 136.20 (s), 131.20 (s), 130.13 (s), 129.91 (s), 128.51 (s), 128.48 (s), 127.67 (s), 127.43 (s), 126.31 (s), 125.64 (s), 72.57 (s), 72.51 (s), 71.70 (s), 70.22 (s), 29.39 (s), 27.54 (s), 18.81 (s), 18.69 (s).

**HRMS (ESI):** [M+H]<sup>+</sup> Calcd. for C<sub>22</sub>H<sub>27</sub>O<sub>2</sub><sup>+</sup> 323.2006.; Found 323.2012.

**(E)-2-(((3-methylbenzyl)oxy)methyl)-6-styryltetrahydro-2H-pyran (5h)**

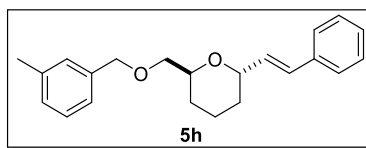

Following the **procedure E** on 0.2 mmol scale, colorless oil liquid, yield: 78% (50.3 mg),  $R_f = 0.6$  (silica gel, PE: EtOAc = 10:1, v/v), column chromatography (silica gel, PE: EtOAc = 80:1, v/v).

d.r. = 3.93:1

$^1\text{H NMR}$  (500 MHz,  $\text{CDCl}_3$ )  $\delta$  7.44 – 7.38 (m, 2H), 7.36 – 7.29 (m, 2H), 7.27 – 7.22 (m, 2H), 7.21 – 7.14 (m, 2H), 7.11 (d,  $J = 7.5$  Hz, 1H), 6.61 (dd,  $J = 16.3, 1.8$  Hz, 1H), 6.36 (dd,  $J = 16.3, 4.9$  Hz, 1H), 4.63 – 4.52 (m, 3H), 4.05 (m, 1H), 3.63 – 3.45 (m, 2H), 2.36 (s, 3H), 1.88 (m, 1H), 1.80 – 1.61 (m, 4H), 1.55 – 1.43 (m, 1H).

$^{13}\text{C NMR}$  (126 MHz,  $\text{CDCl}_3$ )  $\delta$  138.25 (s), 137.87 (s), 136.94 (s), 131.16 (s), 129.89 (s), 128.45 (s), 128.34 (s), 128.20 (s), 128.16 (s), 127.39 (s), 126.29 (s), 124.67 (s), 73.25 (s), 72.46 (s), 72.43 (s), 70.18 (s), 29.32 (s), 27.47 (s), 21.32 (s), 18.64 (s).

**HRMS (ESI):**  $[\text{M}+\text{H}]^+$  Calcd. for  $\text{C}_{22}\text{H}_{27}\text{O}_2^+$  323.2006.; Found 323.2009.

**(E)-2-(((3,5-dimethylbenzyl)oxy)methyl)-6-styryltetrahydro-2H-pyran (5i)**

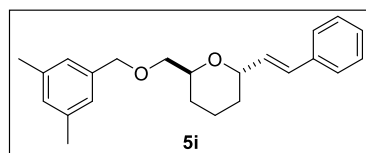

Following the **procedure E** on 0.2 mmol scale, colorless oil liquid, yield: 86% (57.9 mg),  $R_f = 0.6$  (silica gel, PE: EtOAc = 10:1, v/v), column chromatography (silica gel, PE: EtOAc = 80:1, v/v).

d.r. = 3.44:1

$^1\text{H NMR}$  (500 MHz,  $\text{CDCl}_3$ )  $\delta$  7.43 – 7.38 (m, 2H), 7.36 – 7.29 (m, 2H), 7.27 – 7.20 (m, 1H), 6.98 (m, 2H), 6.93 (s, 1H), 6.61 (dd,  $J = 16.2, 1.8$  Hz, 1H), 6.35 (dd,  $J = 16.3, 4.9$  Hz, 1H), 4.64 – 4.42 (m, 3H), 4.08 – 4.00 (m, 1H), 3.66 – 3.34 (m, 2H), 2.32 (s, 6H), 1.93 – 1.83 (m, 1H), 1.78 – 1.61 (m, 4H), 1.53 – 1.43 (m, 1H).

$^{13}\text{C NMR}$  (126 MHz,  $\text{CDCl}_3$ )  $\delta$  138.21 (s), 137.79 (s), 136.97 (s), 131.17 (s), 129.94 (s),

129.11 (s), 128.46 (s), 127.40 (s), 126.31 (s), 125.48 (s), 73.32 (s), 72.47 (s), 72.45 (s), 70.22 (s), 29.37 (s), 27.51 (s), 21.21 (s), 18.66 (s).

**HRMS (EI):** [M] Calcd. for C<sub>23</sub>H<sub>28</sub>O<sub>2</sub> 336.2089.; Found 336.2094.

**(E)-tert-butyl-diphenyl((6-styryltetrahydro-2H-pyran-2-yl)methoxy)silane (5j)**

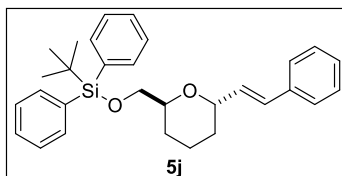

Following the **procedure E** on 0.2 mmol scale, colorless oil liquid, yield: 57% (52.1 mg), R<sub>f</sub> = 0.6 (silica gel, PE: EtOAc = 10:1, v/v), column chromatography (silica gel, PE: EtOAc = 80:1, v/v).

d.r. = 11.11:1

**<sup>1</sup>H NMR (400 MHz, CDCl<sub>3</sub>)** δ 7.81 (m, 4H), 7.54 – 7.44 (m, 8H), 7.41 (m, 2H), 7.36 – 7.30 (m, 1H), 6.70 (dd, J = 16.2, 1.8 Hz, 1H), 6.38 (dd, J = 16.2, 4.8 Hz, 1H), 4.61 (m, 1H), 4.09 – 4.00 (m, 1H), 3.92 (m, 1H), 3.77 (m, 1H), 1.91 (m, 1H), 1.86 – 1.71 (m, 4H), 1.56 (m, 1H), 1.20 (s, 9H).

**<sup>13</sup>C NMR (126 MHz, CDCl<sub>3</sub>)** δ 136.99 (s), 135.56 (s), 133.65 (s), 133.57 (s), 130.95 (s), 130.14 (s), 129.52 (s), 128.42 (s), 127.56 (s), 127.33 (s), 126.26 (s), 72.24 (s), 71.75 (s), 66.08 (s), 29.72 (s), 27.25 (s), 26.83 (s), 19.20 (s), 18.62 (s).

**HRMS (EI):** [M] Calcd. for C<sub>30</sub>H<sub>36</sub>O<sub>2</sub>Si 456.2485.; Found 456.2488.

**(E)-(6-styryltetrahydro-2H-pyran-2-yl)methyl acetate (5k)**

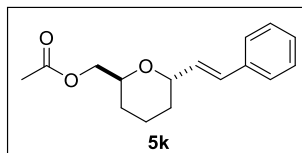

Following the **procedure E** on 0.2 mmol scale, colorless oil liquid, yield: 41% (21.3 mg), R<sub>f</sub> = 0.6 (silica gel, PE: EtOAc = 10:1, v/v), column chromatography (silica gel, PE: EtOAc = 80:1, v/v).

d.r.= 4.60:1



**<sup>1</sup>H NMR (500 MHz, CDCl<sub>3</sub>)** δ 7.42 – 7.37 (m, 2H), 7.32 (m, 2H), 7.25 – 7.22 (m, 1H), 6.59 (dd, J = 16.2, 1.8 Hz, 1H), 6.30 (dd, J = 16.2, 4.9 Hz, 1H), 4.61 (m, 1H), 4.24 – 4.06 (m, 2H), 4.02 (m, 1H), 2.11 (s, 3H), 1.93 – 1.82 (m, 1H), 1.80 – 1.68 (m, 3H), 1.68 – 1.59 (m, 1H), 1.50 – 1.39 (m, 1H).

**<sup>13</sup>C NMR (126 MHz, CDCl<sub>3</sub>)** δ 171.13 (s), 136.85 (s), 130.37 (s), 130.12 (s), 128.43 (s), 127.47 (s), 126.44 (s), 78.24 (s), 75.42 (s), 67.40 (s), 31.51 (s), 27.34 (s), 23.01 (s), 20.97 (s).

**HRMS (EI):** [M] Calcd. for C<sub>16</sub>H<sub>20</sub>O<sub>3</sub> 260.1412; Found 264.1410.

**(E)-(6-styryltetrahydro-2H-pyran-2-yl)methyl pivalate (5I)**

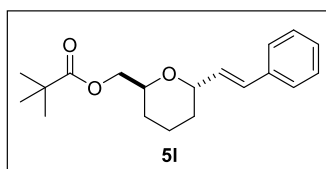

Following the **procedure E** on 0.2 mmol scale, colorless oil liquid, yield: 53% (32.0 mg), R<sub>f</sub> = 0.6 (silica gel, PE: EtOAc = 10:1, v/v), column chromatography (silica gel, PE: EtOAc = 80:1, v/v).

d.r. = 5.21:1

**<sup>1</sup>H NMR (500 MHz, CDCl<sub>3</sub>)** δ 7.41 – 7.36 (m, 2H), 7.32 (dd, J = 8.5, 6.9 Hz, 2H), 7.28 – 7.20 (m, 1H), 6.60 (dd, J = 16.2, 1.9 Hz, 1H), 6.26 (dd, J = 16.2, 4.7 Hz, 1H), 4.59 (m, 1H), 4.27 – 4.19 (m, 1H), 4.09 – 3.99 (m, 2H), 1.90 – 1.81 (m, 1H), 1.78 – 1.68 (m, 3H), 1.71 – 1.62 (m, 1H), 1.43 (m, 1H), 1.23 (s, 9H).

**<sup>13</sup>C NMR (126 MHz, CDCl<sub>3</sub>)** δ 178.37 (s), 136.88 (s), 131.37 (s), 129.68 (s), 128.52 (s), 127.50 (s), 126.26 (s), 72.17 (s), 69.09 (s), 65.83 (s), 38.76 (s), 29.33 (s), 27.18 (s), 27.10 (s), 18.62 (s).

**HRMS (EI):** [M] Calcd. for C<sub>19</sub>H<sub>26</sub>O<sub>3</sub> 302.1882; Found 302.1887.

**(E)-(6-styryltetrahydro-2H-pyran-2-yl)methyl 3-(furan-2-yl)propanoate (5m)**

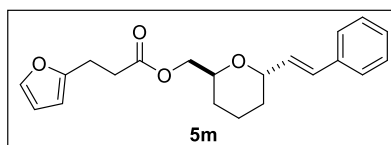

Following the **procedure E** on 0.2 mmol scale, colorless oil liquid, yield: 78% (53.0 mg),  $R_f = 0.6$  (silica gel, PE: EtOAc = 10:1, v/v), column chromatography (silica gel, PE: EtOAc = 80:1, v/v).

d.r. = 7.14:1

$^1\text{H NMR}$  (500 MHz,  $\text{CDCl}_3$ )  $\delta$  7.41 – 7.37 (m, 2H), 7.31 (m, 2H), 7.27 (d,  $J = 1.9$  Hz, 1H), 7.26 – 7.19 (m, 1H), 6.58 (dd,  $J = 16.3, 1.8$  Hz, 1H), 6.28 (dd,  $J = 16.3, 4.9$  Hz, 1H), 6.24 (m, 1H), 6.01 (d,  $J = 3.1$  Hz, 1H), 4.59 (m, 1H), 4.29 – 4.06 (m, 2H), 4.01 (m, 1H), 2.98 (t,  $J = 7.6$  Hz, 2H), 2.71 (m, 2H), 1.86 (m, 1H), 1.77 – 1.66 (m, 3H), 1.66 – 1.56 (m, 1H), 1.43 (m, 1H).

$^{13}\text{C NMR}$  (126 MHz,  $\text{CDCl}_3$ )  $\delta$  172.45 (s), 154.05 (s), 141.15 (s), 136.82 (s), 131.53 (s), 129.47 (s), 128.53 (s), 127.56 (s), 126.32 (s), 110.13 (s), 105.26 (s), 72.42 (s), 69.02 (s), 66.25 (s), 32.57 (s), 29.18 (s), 27.03 (s), 23.40 (s), 18.56 (s).

**HRMS (EI):**  $[M]$  Calcd. for  $\text{C}_{21}\text{H}_{24}\text{O}_4$  340.1675.; Found 340.1680.

**(E)-(6-styryltetrahydro-2H-pyran-2-yl)methyl 6-bromo-2-naphthoate (5n)**

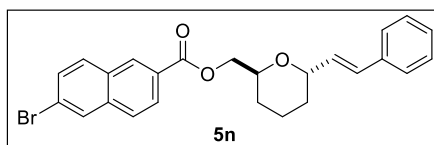

Following the **procedure E** on 0.2 mmol scale, colorless oil liquid, yield: 64% (57.6 mg),  $R_f = 0.5$  (silica gel, PE: EtOAc = 10:1, v/v), column chromatography (silica gel, PE: EtOAc = 80:1, v/v).

d.r. > 20:1

$^1\text{H NMR}$  (500 MHz,  $\text{CDCl}_3$ )  $\delta$  8.60 (s, 1H), 8.11 (dd,  $J = 8.6, 1.7$  Hz, 1H), 8.04 (d,  $J = 1.9$  Hz, 1H), 7.79 (dd,  $J = 8.7, 5.2$  Hz, 2H), 7.60 (dd,  $J = 8.7, 2.0$  Hz, 1H), 7.34 (m, 2H), 7.29 – 7.17 (m, 3H), 6.62 (dd,  $J = 16.3, 1.9$  Hz, 1H), 6.30 (dd,  $J = 16.2, 4.7$  Hz, 1H), 4.69 – 4.65 (m, 1H), 4.50 (dd,  $J = 11.5, 7.1$  Hz, 1H), 4.38 (dd,  $J = 11.4, 4.1$  Hz, 1H), 4.22 (m,

1H), 1.95 – 1.88 (m, 1H), 1.76 (m, 4H), 1.56 (m, 1H).

<sup>13</sup>C NMR (126 MHz, CDCl<sub>3</sub>) δ 166.29 (s), 136.80 (s), 136.42 (s), 131.63 (s), 131.00 (s), 130.86 (s), 130.12 (s), 129.89 (s), 129.47 (s), 128.53 (s), 127.83 (s), 127.20 (s), 126.46 (s), 126.30 (s), 122.60 (s), 72.44 (s), 69.14 (s), 66.95 (s), 29.30 (s), 27.29 (s), 18.71 (s).

HRMS (ESI): [M+H]<sup>+</sup> Calcd. for C<sub>25</sub>H<sub>24</sub>BrO<sub>3</sub><sup>+</sup> 451.0904.; Found 451.0909.

### (E)-(6-styryltetrahydro-2H-pyran-2-yl)methyl cyclobutanecarboxylate (5o)

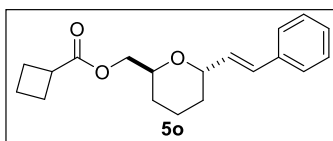

Following the **procedure E** on 0.2 mmol scale, colorless oil liquid, yield: 59% (35.4 mg), R<sub>f</sub> = 0.6 (silica gel, PE: EtOAc = 10:1, v/v), column chromatography (silica gel, PE: EtOAc = 80:1, v/v).

d.r. > 20:1

<sup>1</sup>H NMR (500 MHz, CDCl<sub>3</sub>) δ 7.40 – 7.35 (m, 2H), 7.34 – 7.27 (m, 2H), 7.26 – 7.19 (m, 1H), 6.57 (dd, J = 16.2, 1.8 Hz, 1H), 6.26 (dd, J = 16.2, 4.8 Hz, 1H), 4.58 (m, 1H), 4.24 – 4.04 (m, 2H), 4.01 (m, 1H), 3.19 (m, 1H), 2.36 – 2.15 (m, 4H), 2.04 – 1.80 (m, 3H), 1.77 – 1.66 (m, 3H), 1.66 – 1.60 (m, 1H), 1.47 – 1.36 (m, 1H).

<sup>13</sup>C NMR (126 MHz, CDCl<sub>3</sub>) δ 175.51 (s), 136.90 (s), 131.50 (s), 129.61 (s), 128.55 (s), 127.55 (s), 126.32 (s), 72.37 (s), 69.16 (s), 65.92 (s), 38.03 (s), 29.28 (s), 27.09 (s), 25.31 (s), 25.27 (s), 18.64 (s), 18.41 (s).

HRMS (EI): [M] Calcd. for C<sub>19</sub>H<sub>24</sub>O<sub>3</sub> 300.1725.; Found 300.1722.

### (E)-6-styryltetrahydro-2H-pyran-2-carbaldehyde (5p)

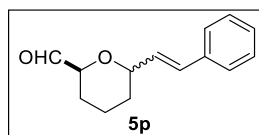

Following the **procedure E** on 0.2 mmol scale, colorless oil liquid, yield: 33% (14.3 mg), R<sub>f</sub> = 0.6 (silica gel, PE: EtOAc = 10:1, v/v), column chromatography (silica gel, PE: EtOAc = 80:1, v/v).

d.r. = 1.67:1

**<sup>1</sup>H NMR (400 MHz, CDCl<sub>3</sub>)** mixture: δ 7.26 (m, 5H), 6.62 (dd, J = 78.3, 15.9 Hz, 1H), 6.23 (ddd, J = 74.5, 15.8, 7.3 Hz, 1H), 5.57 (d, J = 21.1 Hz, 1H), 4.58 (m, 1H), 4.22 (m, 1H), 2.13 – 1.75 (m, 2H), 1.75 – 1.42 (m, 5H).

**<sup>13</sup>C NMR (101 MHz, CDCl<sub>3</sub>)** mixture: δ 136.46 (s), 134.10 (s), 131.30 (s), 129.38 (s), 128.59 (s), 128.49 (s), 127.91 (s), 127.69 (s), 126.57 (s), 126.53 (s), 123.40 (s), 102.98 (s), 102.53 (s), 80.29 (s), 79.82 (s), 78.53 (s), 76.28 (s), 30.93 (s), 30.32 (s), 28.44 (s), 25.03 (s), 15.81 (s), 15.74 (s).

**HRMS (ESI):** [M+H]<sup>+</sup> Calcd. for C<sub>14</sub>H<sub>17</sub>O<sub>2</sub><sup>+</sup> 217.1224; Found 217.1225.

**(8R,9S,13S,14S)-13-methyl-3-(((E)-styryl)tetrahydro-2H-pyran-2-yl)methoxy)-6,7,8,9,11,12,13,14,15,16-decahydro-17H-cyclopenta[a]phenanthren-17-one (5q)**

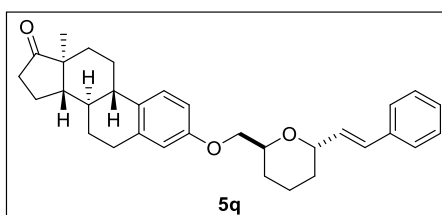

Following the **procedure E** on 0.2 mmol scale, white solid (m. p. = 148 - 150 °C), yield: 73% (68.7 mg), R<sub>f</sub> = 0.4 (silica gel, PE: EtOAc = 10:1, v/v), column chromatography (silica gel, PE: EtOAc = 80:1, v/v).

d.r. = 9.09:1

**<sup>1</sup>H NMR (500 MHz, CDCl<sub>3</sub>)** δ 7.40 – 7.35 (m, 2H), 7.34 – 7.28 (m, 2H), 7.27 – 7.21 (m, 1H), 7.18 (dd, J = 8.7, 1.0 Hz, 1H), 6.75 (dd, J = 8.6, 2.8 Hz, 1H), 6.68 (d, J = 2.7 Hz, 1H), 6.60 (dd, J = 16.3, 1.8 Hz, 1H), 6.33 (dd, J = 16.3, 4.8 Hz, 1H), 4.63 (d, J = 4.9 Hz, 1H), 4.16 (m, 1H), 4.06 (m, 1H), 3.94 (m, 1H), 2.95 – 2.83 (m, 2H), 2.49 (dd, J = 19.0, 8.6 Hz, 1H), 2.42 – 2.35 (m, 1H), 2.28 – 2.20 (m, 1H), 2.13 (m, 1H), 2.07 – 2.02 (m, 1H), 2.02 – 1.85 (m, 3H), 1.81 – 1.70 (m, 4H), 1.66 – 1.53 (m, 3H), 1.53 – 1.36 (m, 4H), 0.90 (s, 3H).

**<sup>13</sup>C NMR (126 MHz, CDCl<sub>3</sub>)** δ 220.95 (s), 156.84 (s), 137.62 (s), 136.88 (s), 132.10 (s), 131.41 (s), 129.63 (s), 128.47 (s), 127.47 (s), 126.31 (s), 126.21 (s), 114.71 (s), 112.25

(s), 72.70 (s), 70.23 (s), 69.40 (s), 50.33 (s), 47.94 (s), 43.91 (s), 38.28 (s), 35.80 (s), 31.51 (s), 29.56 (s), 29.32 (s), 27.49 (s), 26.48 (s), 25.83 (s), 21.51 (s), 18.60 (s), 13.79 (s).

**HRMS (ESI):**  $[M+H]^+$  Calcd. for  $C_{32}H_{39}O_3^+$  471.2894.; Found 471.2904.

**(E)-(6-styryltetrahydro-2H-pyran-2-yl)methyl 2-(4-isobutylphenyl)propanoate (5r)**

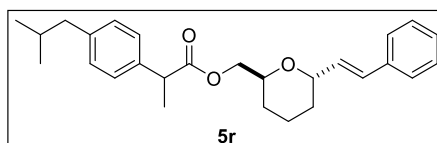

Following the **procedure E** on 0.2 mmol scale, colorless oil liquid, yield: 53% (43.1 mg),  $R_f = 0.6$  (silica gel, PE: EtOAc = 10:1, v/v), column chromatography (silica gel, PE: EtOAc = 80:1, v/v).

d.r. = 8.53:1

**$^1H$  NMR (500 MHz,  $CDCl_3$ )**  $\delta$  7.38 – 7.34 (m, 2H), 7.31 (m, 2H), 7.24 (m, 1H), 7.23 – 7.18 (m, 2H), 7.07 – 7.02 (m, 2H), 6.54 (ddd,  $J = 16.4, 12.4, 1.8$  Hz, 1H), 6.22 (ddd,  $J = 16.3, 4.9, 3.4$  Hz, 1H), 4.53 (m, 1H), 4.28 – 4.01 (m, 2H), 3.98 (m, 1H), 3.75 (q,  $J = 7.2$  Hz, 1H), 2.39 (dd,  $J = 7.2, 4.5$  Hz, 2H), 1.86 – 1.74 (m, 2H), 1.66 (m, 3H), 1.54 (m, 1H), 1.49 (d,  $J = 7.1$  Hz, 3H), 1.33 (m, 1H), 0.86 (dd,  $J = 6.6, 2.8$  Hz, 6H).

**$^{13}C$  NMR (126 MHz,  $CDCl_3$ )**  $\delta$  174.70 (s), 140.46 (s), 137.66 (s), 136.90 (s), 131.40 (s), 129.63 (s), 129.26 (s), 128.53 (s), 127.54 (s), 127.20 (s), 126.35 (s), 72.30 (s), 69.07 (s), 66.18 (s), 44.99 (s), 30.13 (s), 29.34 (s), 26.94 (s), 22.34 (s), 18.54 (s).

**HRMS (EI):**  $[M]$  Calcd. for  $C_{27}H_{34}O_3$  406.2508.; Found 406.2503.

**(E)-(6-styryltetrahydro-2H-pyran-2-yl)methyl 2-(11-oxo-6,11-dihydrodibenzo[b,e]oxepin-3-yl)acetate (5s)**

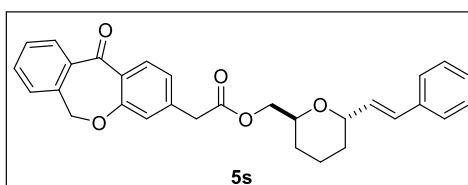

Following the **procedure E** on 0.2 mmol scale, colorless oil liquid, yield: 69% (64.7

mg),  $R_f = 0.4$  (silica gel, PE: EtOAc = 10:1, v/v), column chromatography (silica gel, PE: EtOAc = 80:1, v/v).

d.r. = 18.53:1

**$^1\text{H}$  NMR (400 MHz,  $\text{CDCl}_3$ )**  $\delta$  8.13 (d,  $J = 2.4$  Hz, 1H), 7.87 (dd,  $J = 7.7, 1.4$  Hz, 1H), 7.55 (m, 1H), 7.50 – 7.41 (m, 2H), 7.39 – 7.17 (m, 6H), 6.99 (d,  $J = 8.5$  Hz, 1H), 6.55 (dd,  $J = 16.2, 1.8$  Hz, 1H), 6.26 (dd,  $J = 16.2, 4.9$  Hz, 1H), 5.14 (s, 2H), 4.58 (m, 1H), 4.37 – 3.98 (m, 3H), 3.70 (s, 2H), 1.85 (m, 1H), 1.77 – 1.56 (m, 4H), 1.43 (m, 1H).

**$^{13}\text{C}$  NMR (101 MHz,  $\text{CDCl}_3$ )**  $\delta$  190.74 (s), 171.38 (s), 160.43 (s), 140.43 (s), 136.83 (s), 136.37 (s), 135.54 (s), 132.69 (s), 132.48 (s), 131.52 (s), 129.52 (s), 129.46 (s), 129.21 (s), 128.53 (s), 127.76 (s), 127.74 (s), 127.54 (s), 126.36 (s), 125.09 (s), 121.01 (s), 73.57 (s), 72.42 (s), 69.01 (s), 66.61 (s), 40.10 (s), 29.22 (s), 27.03 (s), 18.58 (s).

**HRMS (ESI):**  $[\text{M}+\text{H}]^+$  Calcd. for  $\text{C}_{30}\text{H}_{29}\text{O}_5^+$  469.2010.; Found 469.2010.

#### (E)-2-((benzyloxy)methyl)-6-(hex-1-en-1-yl)tetrahydro-2H-pyran (5t)

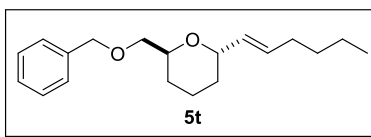

Following the **procedure E** on 0.2 mmol scale, colorless oil liquid, yield: 48% (27.6 mg),  $R_f = 0.6$  (silica gel, PE: EtOAc = 10:1, v/v), column chromatography (silica gel, PE: EtOAc = 80:1, v/v).

d.r. = 5.88:1

**$^1\text{H}$  NMR (500 MHz,  $\text{CDCl}_3$ )**  $\delta$  7.37 – 7.30 (m, 4H), 7.30 – 7.23 (m, 1H), 5.70 – 5.55 (m, 2H), 4.62 – 4.52 (m, 2H), 4.34 (q,  $J = 4.7$  Hz, 1H), 3.95 (m, 1H), 3.59 – 3.33 (m, 2H), 2.11 – 1.99 (m, 2H), 1.79 – 1.72 (m, 2H), 1.70 – 1.52 (m, 3H), 1.47 – 1.41 (m, 1H), 1.41 – 1.28 (m, 4H), 0.90 (t,  $J = 7.1$  Hz, 3H).

**$^{13}\text{C}$  NMR (126 MHz,  $\text{CDCl}_3$ )**  $\delta$  138.57 (s), 133.03 (s), 129.79 (s), 128.41 (s), 127.75 (s), 127.59 (s), 73.34 (s), 72.66 (s), 72.61 (s), 69.99 (s), 32.29 (s), 31.47 (s), 29.45 (s), 27.69 (s), 22.32 (s), 18.66 (s), 14.03 (s).

**HRMS (EI):**  $[\text{M}]$  Calcd. for  $\text{C}_{19}\text{H}_{28}\text{O}_2$  288.2089.; Found 288.2079.

**(E)-2-((benzyloxy)methyl)-6-(pent-1-en-1-yl)tetrahydro-2H-pyran (5u)**

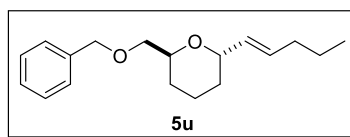

Following the **procedure E** on 0.2 mmol scale, colorless oil liquid, yield: 49% (26.9 mg),  $R_f = 0.6$  (silica gel, PE: EtOAc = 10:1, v/v), column chromatography (silica gel, PE: EtOAc = 80:1, v/v).

d.r. = 5.90:1

$^1\text{H NMR}$  (500 MHz,  $\text{CDCl}_3$ )  $\delta$  7.36 – 7.30 (m, 4H), 7.28 – 7.23 (m, 1H), 5.68 – 5.54 (m, 2H), 4.61 – 4.51 (m, 2H), 4.33 (q,  $J = 4.6, 4.2$  Hz, 1H), 3.94 (m, 1H), 3.59 – 3.33 (m, 2H), 2.02 (m, 2H), 1.79 – 1.70 (m, 2H), 1.69 – 1.52 (m, 3H), 1.46 – 1.35 (m, 3H), 0.89 (t,  $J = 7.3$  Hz, 3H).

$^{13}\text{C NMR}$  (126 MHz,  $\text{CDCl}_3$ )  $\delta$  138.49 (s), 132.70 (s), 129.94 (s), 128.33 (s), 127.67 (s), 127.51 (s), 73.26 (s), 72.57 (s), 72.54 (s), 69.91 (s), 34.61 (s), 29.37 (s), 27.62 (s), 22.36 (s), 18.58 (s), 13.71 (s).

**HRMS (EI):** [M] Calcd. for  $\text{C}_{18}\text{H}_{26}\text{O}_2$  274.1933.; Found 274.1933.

**(E)-2-styryltetrahydrofuran (5a')**

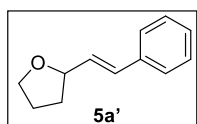

Following the **procedure E** on 0.2 mmol scale, colorless oil liquid, yield: 72% (25.1 mg),  $R_f = 0.6$  (silica gel, PE: EtOAc = 10:1, v/v), column chromatography (silica gel, PE: EtOAc = 80:1, v/v).

$^1\text{H NMR}$  (500 MHz,  $\text{CDCl}_3$ )  $\delta$  7.39 (m, 2H), 7.31 (m, 2H), 7.25 – 7.20 (m, 1H), 6.59 (d,  $J = 15.9$  Hz, 1H), 6.22 (dd,  $J = 15.8, 6.6$  Hz, 1H), 4.48 (q,  $J = 6.9$  Hz, 1H), 4.02 – 3.94 (m, 1H), 3.85 (m, 1H), 2.18 – 2.08 (m, 1H), 1.98 – 1.89 (m, 1H), 1.72 (m, 1H).

$^{13}\text{C NMR}$  (126 MHz,  $\text{CDCl}_3$ )  $\delta$  136.79 (s), 130.45 (s), 130.36 (s), 128.44 (s), 127.42 (s), 126.39 (s), 79.60 (s), 68.11 (s), 32.33 (s), 25.85 (s).

**HRMS (EI):** [M] Calcd. for C<sub>12</sub>H<sub>14</sub>O 174.1045.; Found 174.1038.

**tert-butyl (E)-2-styrylpyrrolidine-1-carboxylate (5b')**

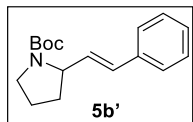

Following the **procedure E** on 0.2 mmol scale, colorless oil liquid, yield: 46% (25.2 mg), R<sub>f</sub> = 0.6 (silica gel, PE: EtOAc = 10:1, v/v), column chromatography (silica gel, PE: EtOAc = 80:1, v/v).

**<sup>1</sup>H NMR (400 MHz, CDCl<sub>3</sub>)** δ 7.47 – 7.16 (m, 5H), 6.43 (d, J = 15.6 Hz, 1H), 6.11 (d, J = 14.1 Hz, 1H), 4.48 (m, 1H), 3.85 – 3.10 (m, 2H), 2.11 (m, 1H), 2.01 – 1.73 (m, 3H), 1.45 (s, 9H).

**<sup>13</sup>C NMR (101 MHz, CDCl<sub>3</sub>)** δ 154.60 (s), 136.99 (s), 130.65 (s), 129.35 (s), 128.43 (s), 127.17 (s), 126.20 (s), 79.09 (s), 58.89 (s), 46.21 (s), 32.48 (s), 28.42 (s), 22.99 (s).

**HRMS (EI):** [M] Calcd. for C<sub>17</sub>H<sub>23</sub>NO<sub>2</sub> 273.1729.; Found 273.1736.

**tert-butyl (E)-2-styrylpiperidine-1-carboxylate (5c')**

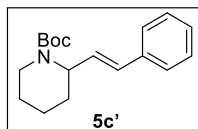

Following the **procedure E** on 0.2 mmol scale, colorless oil liquid, yield: 53% (30.5 mg), R<sub>f</sub> = 0.6 (silica gel, PE: EtOAc = 10:1, v/v), column chromatography (silica gel, PE: EtOAc = 80:1, v/v).

**<sup>1</sup>H NMR (500 MHz, CDCl<sub>3</sub>)** δ 7.40 – 7.28 (m, 4H), 7.23 (m, 1H), 6.39 (dd, J = 16.1, 1.7 Hz, 1H), 6.18 (dd, J = 16.2, 4.8 Hz, 1H), 4.96 (s, 1H), 4.00 (m, 1H), 2.91 (m, 1H), 1.87 – 1.71 (m, 2H), 1.62 (m, 4H), 1.48 (s, 9H).

**<sup>13</sup>C NMR (126 MHz, CDCl<sub>3</sub>)** δ 155.38 (s), 137.04 (s), 130.71 (s), 128.71 (s), 128.52 (s), 127.34 (s), 126.21 (s), 79.44 (s), 52.20 (s), 39.85 (s), 29.49 (s), 28.46 (s), 25.54 (s), 19.67 (s).

**HRMS (ESI):** [M+H]<sup>+</sup> Calcd. for C<sub>18</sub>H<sub>26</sub>NO<sub>2</sub><sup>+</sup> 288.1959.; Found 288.1954.



**(2S,3R,6S)-2-methyl-6-((E)-styryl)-3,6-dihydro-2H-pyran-3-yl acetate (5d')**

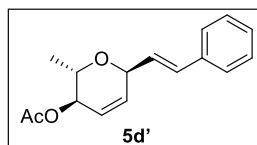

Following the **procedure F** on 0.2 mmol scale, colorless oil liquid, yield: 59% (30.5 mg),  $R_f = 0.5$  (silica gel, PE: EtOAc = 5:1, v/v), column chromatography (silica gel, PE: EtOAc = 20:1, v/v).

d.r. = 5.37:1

**$^1\text{H}$  NMR (400 MHz,  $\text{CDCl}_3$ )**  $\delta$  7.33 (d,  $J = 7.6$  Hz, 2H), 7.25 (t,  $J = 7.5$  Hz, 2H), 7.19 (m, 1H), 6.52 (d,  $J = 16.0$  Hz, 1H), 6.21 (m, 1H), 5.95 – 5.88 (m, 1H), 5.79 (m, 1H), 4.95 (dt,  $J = 6.8, 2.4$  Hz, 1H), 4.79 – 4.74 (m, 1H), 3.81 (t,  $J = 6.6$  Hz, 1H), 2.02 (s, 3H), 1.19 (dd,  $J = 6.4, 1.7$  Hz, 3H).

**$^{13}\text{C}$  NMR (101 MHz,  $\text{CDCl}_3$ )**  $\delta$  170.67 (s), 136.35 (s), 132.68 (s), 131.38 (s), 128.55 (s), 127.89 (s), 126.85 (s), 126.54 (s), 124.86 (s), 71.89 (s), 70.06 (s), 67.56 (s), 21.17 (s), 17.60 (s).

**HRMS (EI):** [M] Calcd. for  $\text{C}_{16}\text{H}_{18}\text{O}_3$  258.1256.; Found 258.1254.

**((2R,3S,6R)-3-acetoxy-6-((E)-styryl)-3,6-dihydro-2H-pyran-2-yl)methyl acetate (5e')**

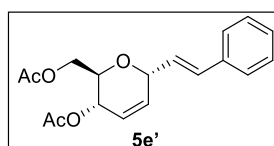

Following the **procedure F** on 0.2 mmol scale, colorless oil liquid, yield: 46% (29.1 mg),  $R_f = 0.5$  (silica gel, PE: EtOAc = 5:1, v/v), column chromatography (silica gel, PE: EtOAc = 20:1, v/v).

d.r. = 11.50:1

**$^1\text{H}$  NMR (500 MHz,  $\text{CDCl}_3$ )**  $\delta$  7.40 – 7.36 (m, 2H), 7.32 (m, 2H), 7.26 (m, 1H), 6.66 – 6.57 (m, 1H), 6.25 (dd,  $J = 16.1, 5.5$  Hz, 1H), 6.00 (m, 1H), 5.88 (m, 1H), 5.27 (m, 1H), 4.92 (m, 1H), 4.30 – 4.13 (m, 2H), 3.94 (m, 1H), 2.09 (s, 3H), 2.07 (s, 3H).

$^{13}\text{C}$  NMR (126 MHz,  $\text{CDCl}_3$ )  $\delta$  170.80 (s), 170.29 (s), 136.17 (s), 133.06 (s), 130.84 (s), 128.57 (s), 128.01 (s), 126.53 (s), 125.90 (s), 125.25 (s), 72.58 (s), 68.98 (s), 65.04 (s), 63.15 (s), 20.98 (s), 20.78 (s).

HRMS (ESI):  $[\text{M}+\text{H}]^+$  Calcd. for  $\text{C}_{18}\text{H}_{21}\text{O}_5^+$  317.1384.; Found 317.1390.

**(2R,3S,6R)-3-(benzyloxy)-2-((benzyloxy)methyl)-6-((E)-styryl)-3,6-dihydro-2H-pyran (5f')**

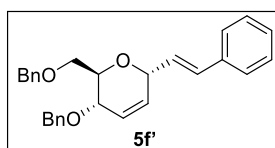

Following the **procedure F** on 0.2 mmol scale, colorless oil liquid, yield: 39% (32.2 mg),  $R_f = 0.5$  (silica gel, PE: EtOAc = 5:1, v/v), column chromatography (silica gel, PE: EtOAc = 20:1, v/v).

d.r. = 3.00:1

$^1\text{H}$  NMR (400 MHz,  $\text{CDCl}_3$ )  $\delta$  7.34 (m, 15H), 6.12 (d,  $J = 10.4$  Hz, 1H), 5.83 (dd,  $J = 10.2, 2.5$  Hz, 1H), 5.16 (d,  $J = 2.6$  Hz, 1H), 4.85 (d,  $J = 11.8$  Hz, 1H), 4.69 – 4.60 (m, 3H), 4.51 (m, 2H), 4.23 (d,  $J = 9.4$  Hz, 1H), 4.05 (m, 1H), 3.76 (dd,  $J = 10.7, 4.1$  Hz, 1H), 3.67 (dd,  $J = 10.7, 2.0$  Hz, 1H).

$^{13}\text{C}$  NMR (101 MHz,  $\text{CDCl}_3$ )  $\delta$  138.17 (s), 138.05 (s), 138.03 (s), 130.81 (s), 128.35 (s), 128.31 (s), 127.99 (s), 127.92 (s), 127.81 (s), 127.79 (s), 127.76 (s), 127.71 (s), 127.67 (s), 127.57 (s), 126.50 (s), 93.94 (s), 73.35 (s), 71.02 (s), 70.35 (s), 70.01 (s), 69.30 (s), 68.74 (s).

HRMS (EI):  $[\text{M}]$  Calcd. for  $\text{C}_{28}\text{H}_{28}\text{O}_3$  412.2038.; Found 412.2033.

## 7. Scale-up reactions and synthetic applications.

### 7.1 12 mmol scale reactions.

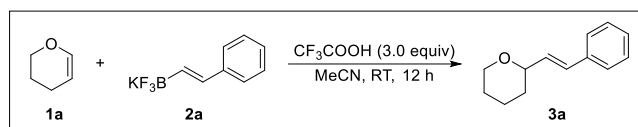

To a 500mL flame-dried Schlenk flask were added  $\text{FeCl}_2$  (20 mol%), **2a** (30 mmol, 2.5 equiv), and the flask was evacuated and refilled with argon (three times). Subsequently,  $\text{CH}_3\text{CN}$  (180 mL), **1a** (12 mmol, 1.0 equiv) and  $\text{CF}_3\text{COOH}$  (36 mmol, 3.0 equiv) were added and the reaction was stirred at room temperature for 12 h. The reaction mixture was diluted with ethyl acetate and the solution washed with saturated aqueous  $\text{NaHCO}_3$ , water and brine. The combined organic layers were dried over  $\text{Na}_2\text{SO}_4$  and concentrated under reduced pressure. The crude product was then purified by flash column chromatography to afford the final product **3a** (1.66 g, 74%) as colorless liquid.

### 7.2 Synthetic applications.

a.

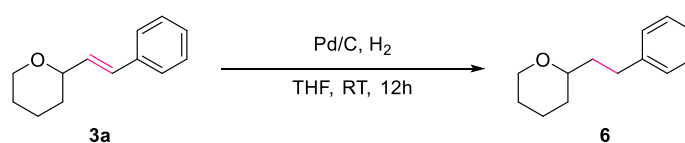

To the alkene **3a** (0.5 mmol, 1.0 equiv) in  $\text{THF}$  (5 mL), was added palladium on activated carbon (5 %, 0.1 equiv). The reaction solution was purged with hydrogen balloon for 15 minutes and then went overnight under hydrogen balloon. Then, the reaction was filtered over a short path of Celite, concentrated in vacuo, and the crude mixture was purified by flash column chromatography to afford the final product **6** (88.5 mg, 93%) as colorless liquid.

## 2-phenethyltetrahydro-2H-pyran (**6**)<sup>22</sup>

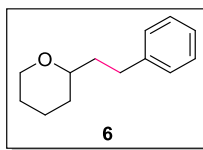

Spectroscopic data are in agreement with those previously reported<sup>23</sup>.

<sup>1</sup>H NMR (500 MHz, CDCl<sub>3</sub>) δ 7.32 – 7.17 (m, 5H), 4.03 (m, 1H), 3.44 (td, J = 11.7, 2.4 Hz, 1H), 3.26 (m, 1H), 2.74 (m, 2H), 1.92 – 1.79 (m, 2H), 1.70 (m, 1H), 1.64 – 1.42 (m, 4H), 1.32 (m, 1H).

<sup>13</sup>C NMR (126 MHz, CDCl<sub>3</sub>) δ 142.36 (s), 128.42 (s), 128.22 (s), 125.59 (s), 76.83 (s), 68.39 (s), 38.26 (s), 31.89 (s), 31.72 (s), 26.14 (s), 23.46 (s).

b.

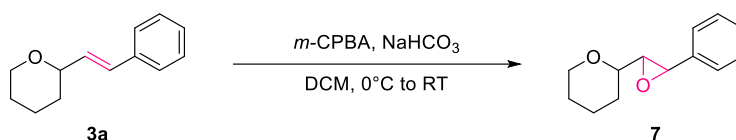

To a 100 mL dried Schlenk flask was added **3a** (0.5 mmol, 1.0 equiv), NaHCO<sub>3</sub> (0.65 mmol, 1.3 equiv) and DCM (2 mL) under argon atmosphere. Then *m*-CPBA (73%, 1.2 equiv) dissolved in DCM (2 mL) was added dropwise at 0 °C. The reaction was stirred for 1 h and then allowed to warm to room temperature. After completion of the reaction (TLC monitoring), the reaction mixture is quenched with aqueous Na<sub>2</sub>S<sub>2</sub>O<sub>4</sub>, and the aqueous phase is extracted with DCM. The combined organic layers are washed successively with a saturated solution of NaHCO<sub>3</sub> and brine and dried over Na<sub>2</sub>SO<sub>4</sub>. The filtrate was concentrated under reduced pressure and the crude mixture was purified by flash column chromatography to afford the final product **7** (87.8 mg, 86%, 1.5 :1) as colorless liquid.

## 2-(3-phenyloxiran-2-yl)tetrahydro-2H-pyran (**7**)<sup>24</sup>

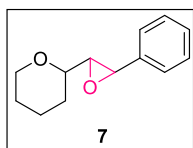

<sup>1</sup>H NMR (400 MHz, CDCl<sub>3</sub>) major isomer: δ 7.40 – 7.28 (m, 5H), 4.05 (m, 1H), 3.92

(d,  $J = 2.0$  Hz, 1H), 3.49 (m, 2H), 3.04 (dd,  $J = 4.2, 2.1$  Hz, 1H), 1.94 (m, 1H), 1.84 – 1.74 (m, 1H), 1.66 – 1.43 (m, 4H).

$^{13}\text{C}$  NMR (101 MHz,  $\text{CDCl}_3$ ) major isomer:  $\delta$  137.23 (s), 128.37 (s), 128.08 (s), 125.70 (s), 76.23 (s), 68.45 (s), 64.07 (s), 56.02 (s), 28.34 (s), 25.87 (s), 22.85 (s).

HRMS (EI): [M] Calcd. for  $\text{C}_{13}\text{H}_{16}\text{O}_2$  204.1150; Found 204.1142.

c.

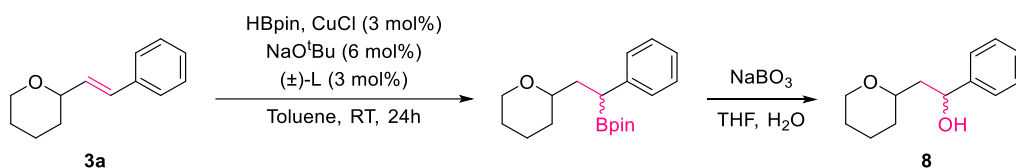

A mixture of CuCl (3 mol%), NaO<sup>t</sup>Bu (6 mol%), and DTBM-segphos (3 mol%) in anhydrous toluene (0.2 mL) was stirred for 10 min in a Schlenk tube under an atmosphere of argon. Pinacolborane (0.6 mmol, 1.2 equiv) was added to the reaction mixture and stirred for 10 min at room temperature. **3a** (0.5 mmol, 1.0 equiv) was dissolved in toluene (0.3 mL) and added. The reaction was monitored by TLC and was filtered through a pad of Celite and concentrated, and it was diluted with THF (1 mL) and water (1.0 mL) and then followed by addition of NaBO<sub>3</sub> (1.0 mmol, 2.0 equiv) and the mixture was allowed to stir for 3h at room temperature. The product was purified by chromatography on silica gel to afford the final product **8** (87.8 mg, 75%, 1 :1) as colorless liquid.

**1-phenyl-2-(tetrahydro-2H-pyran-2-yl)ethan-1-ol (8)**<sup>25,22</sup>

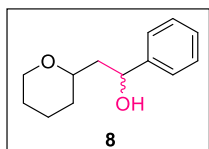

$^1\text{H}$  NMR (400 MHz,  $\text{CDCl}_3$ ) mixture:  $\delta$  7.33 (m, 8H), 7.23 (m, 2H), 4.97 (m, 1H), 4.91 (dd,  $J = 9.9, 3.0$  Hz, 1H), 4.32 (s, 1H), 4.00 (dt,  $J = 11.4, 7.1$  Hz, 2H), 3.79 (d,  $J = 4.8$  Hz, 1H), 3.60 (t,  $J = 10.6$  Hz, 1H), 3.43 (m, 3H), 1.96 – 1.76 (m, 5H), 1.62 – 1.35 (m, 11H).

$^{13}\text{C}$  NMR (101 MHz,  $\text{CDCl}_3$ ) mixture:  $\delta$  144.83 (s), 144.47 (s), 128.14 (s), 128.11 (s), 127.05 (s), 126.80 (s), 125.60 (s), 125.42 (s), 78.84 (s), 75.24 (s), 74.27 (s), 71.08 (s), 68.28 (s), 68.25 (s), 45.57 (s), 44.29 (s), 32.08 (s), 31.47 (s), 25.74 (s), 25.63 (s), 23.15 (s), 23.02 (s).

HRMS (ESI):  $[\text{M}+\text{H}]^+$  Calcd. for  $\text{C}_{13}\text{H}_{19}\text{O}_2^+$  207.1380; Found 207.1380.

d.

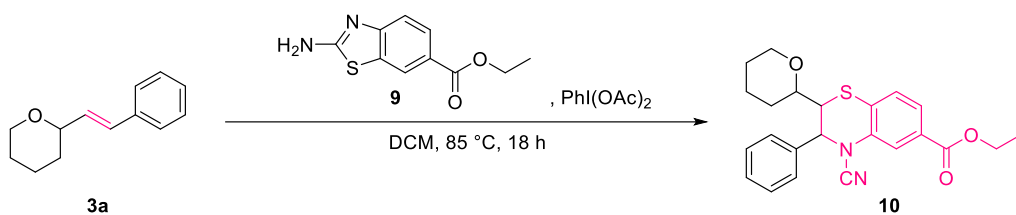

A 10 mL pressure-resistant tube equipped with a magnetic stir bar was charged with the  $\text{PhI}(\text{OAc})_2$  (0.2 mmol, 2.0 equiv), 2-benzoaminothiazole **9** (0.1 mmol, 1.0 equiv), then the tube was evacuated and backfilled with argon for three times. Under argon atmosphere, DCM (1 mL) and **3a** (0.3 mmol, 3.0 equiv) were added to the system. The mixture was stirred at 85 °C for 18 hours. After completion of the reaction (monitored by TLC), then cooled to room temperature. Solvent and volatile reagents were removed by rotary evaporation and the residue was purified by flash column chromatography on silica gel to give the final product **10** (28.1 mg, 69%) as colorless liquid.

**ethyl 4-cyano-3-phenyl-2-(tetrahydro-2H-pyran-2-yl)-3,4-dihydro-2H-benzo[b][1,4]thiazine-6-carboxylate (10)**<sup>26</sup>

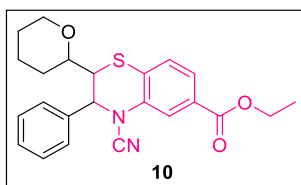

$^1\text{H}$  NMR (400 MHz,  $\text{CDCl}_3$ )  $\delta$  7.88 (d,  $J$  = 8.7 Hz, 1H), 7.81 (s, 1H), 7.50 (d,  $J$  = 8.6 Hz, 1H), 7.32 (m, 3H), 7.17 (m, 2H), 5.81 (d,  $J$  = 3.0 Hz, 1H), 4.35 (q,  $J$  = 7.2 Hz, 2H), 4.15 – 4.08 (m, 1H), 3.47 (td,  $J$  = 11.5, 3.0 Hz, 1H), 3.23 (t,  $J$  = 10.3 Hz, 1H), 3.07 (dd,  $J$  = 9.8, 2.9 Hz, 1H), 2.22 (d,  $J$  = 13.0 Hz, 1H), 1.88 (d,  $J$  = 13.1 Hz, 1H), 1.56 (m, 2H),

1.38 (m, 4H), 1.24 (m, 1H).

$^{13}\text{C}$  NMR (101 MHz,  $\text{CDCl}_3$ )  $\delta$  165.21 (s), 138.40 (s), 136.88 (s), 130.02 (s), 128.67 (s), 128.26 (s), 127.80 (s), 125.79 (s), 125.65 (s), 117.99 (s), 116.51 (s), 112.04 (s), 76.31 (s), 68.98 (s), 61.09 (s), 59.31 (s), 48.77 (s), 29.83 (s), 25.65 (s), 23.10 (s), 14.25 (s).

HRMS (EI): [M] Calcd. for  $\text{C}_{23}\text{H}_{24}\text{N}_2\text{O}_3\text{S}$  408.1508; Found 408.1511.

## 8. Control experiments.

A.

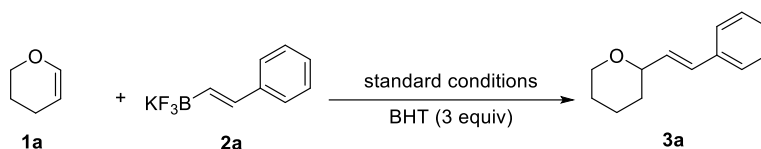

To a flame-dried Schlenk tube were added  $\text{FeCl}_2$  (20 mol%), **2a** (0.5 mmol, 2.5 equiv) and additional BHT (0.6 mmol, 3.0 equiv), and the tube was evacuated and refilled with argon (three times). Subsequently,  $\text{CH}_3\text{CN}$  (3 mL), **1a** (0.2 mmol, 1.0 equiv) and  $\text{CF}_3\text{COOH}$  (0.6 mmol, 3.0 equiv) were added and the reaction was stirred at room temperature for 12 h. **3a** yield 73% determined by GC analysis by using dodecane as the internal standard.

B.

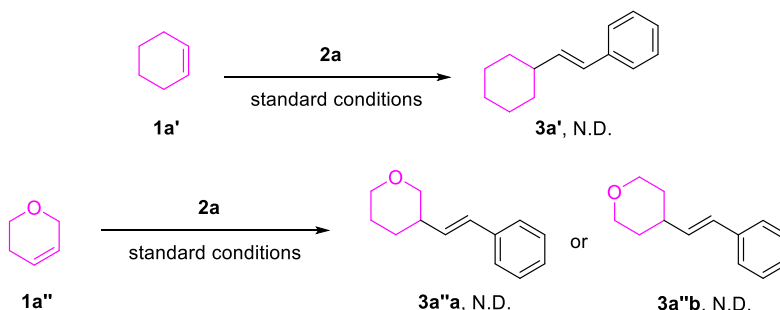

To a flame-dried Schlenk tube were added  $\text{FeCl}_2$  (20 mol%), **2a** (0.5 mmol, 2.5 equiv) and the tube was evacuated and refilled with argon (three times). Subsequently,  $\text{CH}_3\text{CN}$  (3 mL), **1a'** or **1a''** (0.2 mmol, 1.0 equiv) and  $\text{CF}_3\text{COOH}$  (0.6 mmol, 3.0 equiv) were

added and the reaction was stirred at room temperature for 12 h. None of the corresponding product was detected by GC.

## 9. General methods for determination of the d.r. ratios and configurations

Taking **5d** as an illustration, we showed the determination details of the d.r. ratios and configurations by means of  $^1\text{H}$  NMR and  $^1\text{H}$   $^1\text{H}$  NOESY NMR. Upon completion, the reaction was filtered over a short path of celite and then concentrated in vacuo to obtain the  $^1\text{H}$  NMR spectrum of the crude product (Figure S1). Then, it was further purified by column chromatography to afford the pure product **5d** and *sub-5d*, and the NMR spectrum of them were obtained respectively (Figure S2-5). By comparing the  $^1\text{H}$  NMR spectrum of the crude product with compound **5d** and *sub-5d*, we could confirm the characteristic peak (for example, the hydrogen atom H1 of **5d** is around 4.69 ppm and 3.70 ppm of *sub-5d*). Based on the integration of the H1 signals of compounds **5d** and *sub-5d*, the d.r. ratio is about 4.00:1. As for the configurations, no obvious signals between H1 and H5 have been represented in  $^1\text{H}$   $^1\text{H}$  NOESY NMR of **5d**, but *sub-5d* does, so H1 and H5 of **5d** were on the different sides of the six-membered ring. In the same way, the d.r. ratios and configurations of other **5a-u** compounds were also determined.



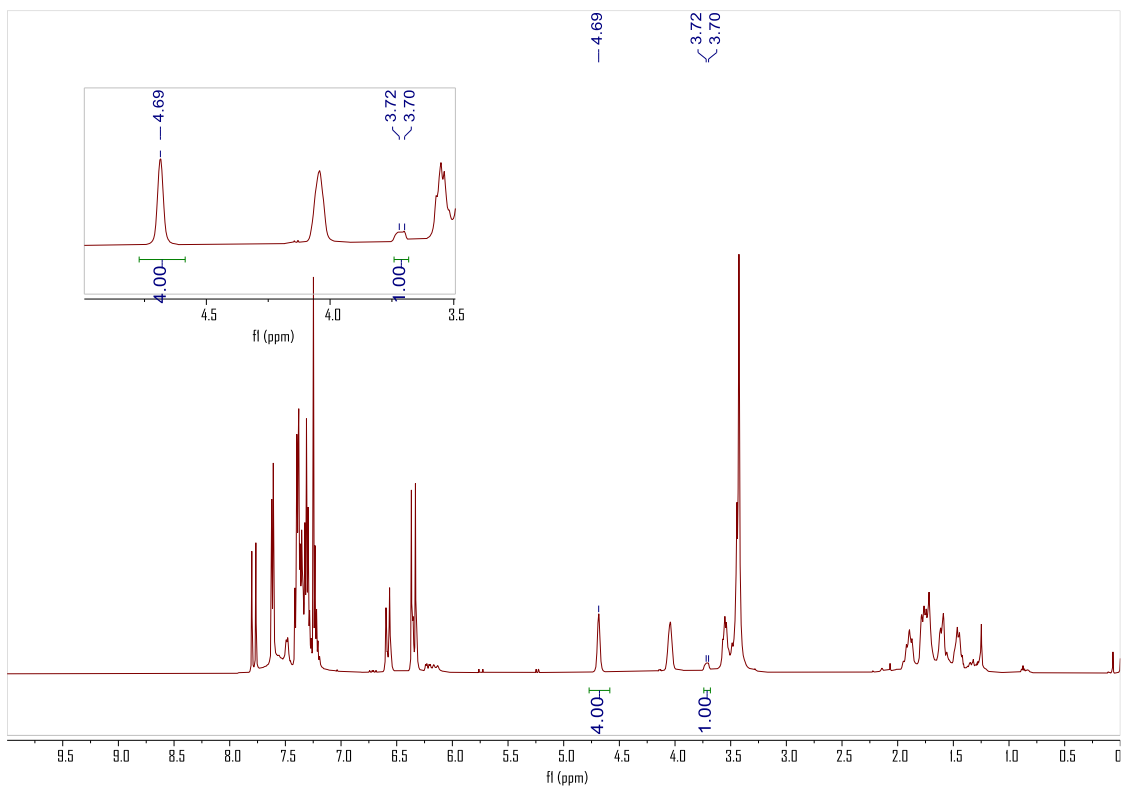

**Figure S1:**  $^1\text{H}$  NMR spectrum of the crude product

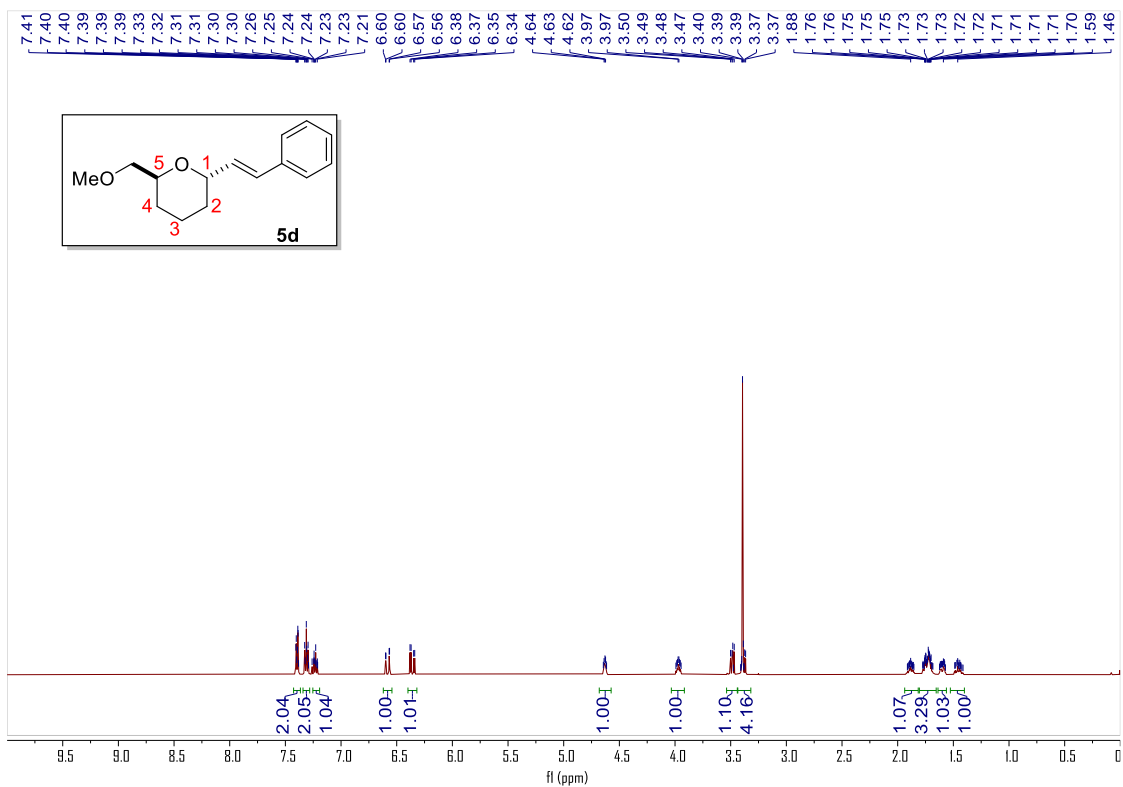

**Figure S2:**  $^1\text{H}$  NMR spectrum of **5d**

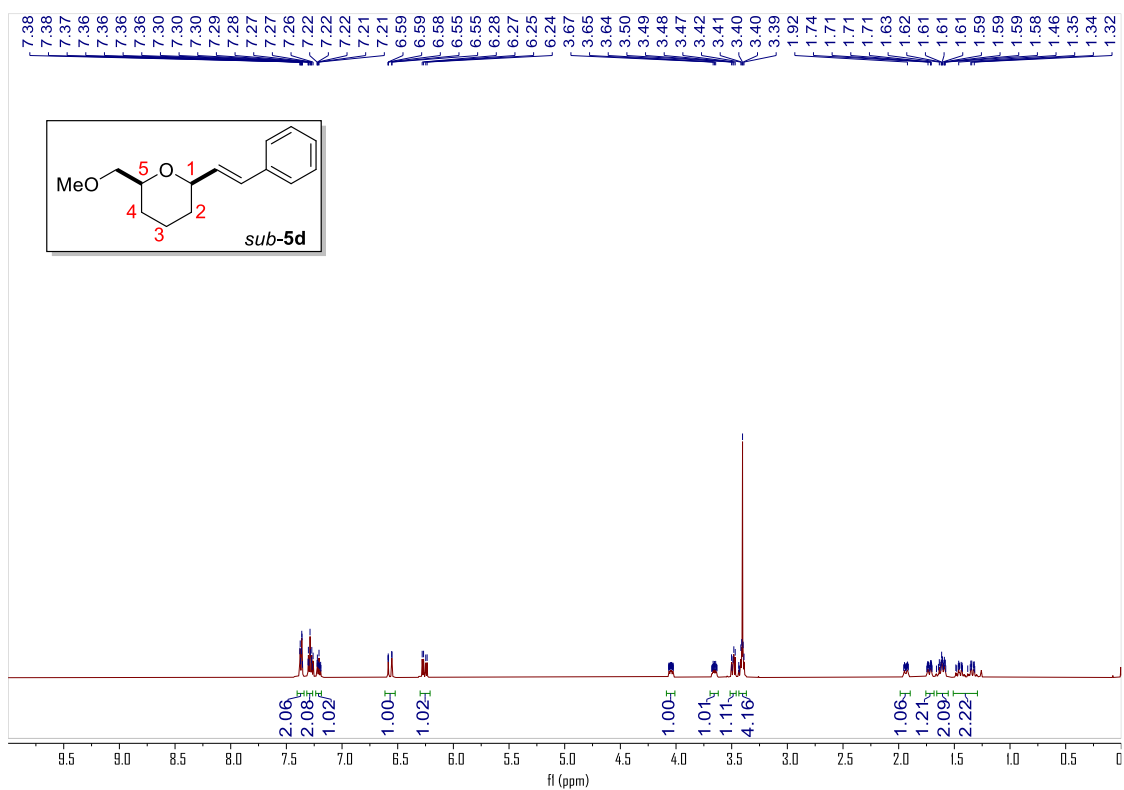

Figure S3:  $^1\text{H}$  NMR spectrum of *sub-5d*

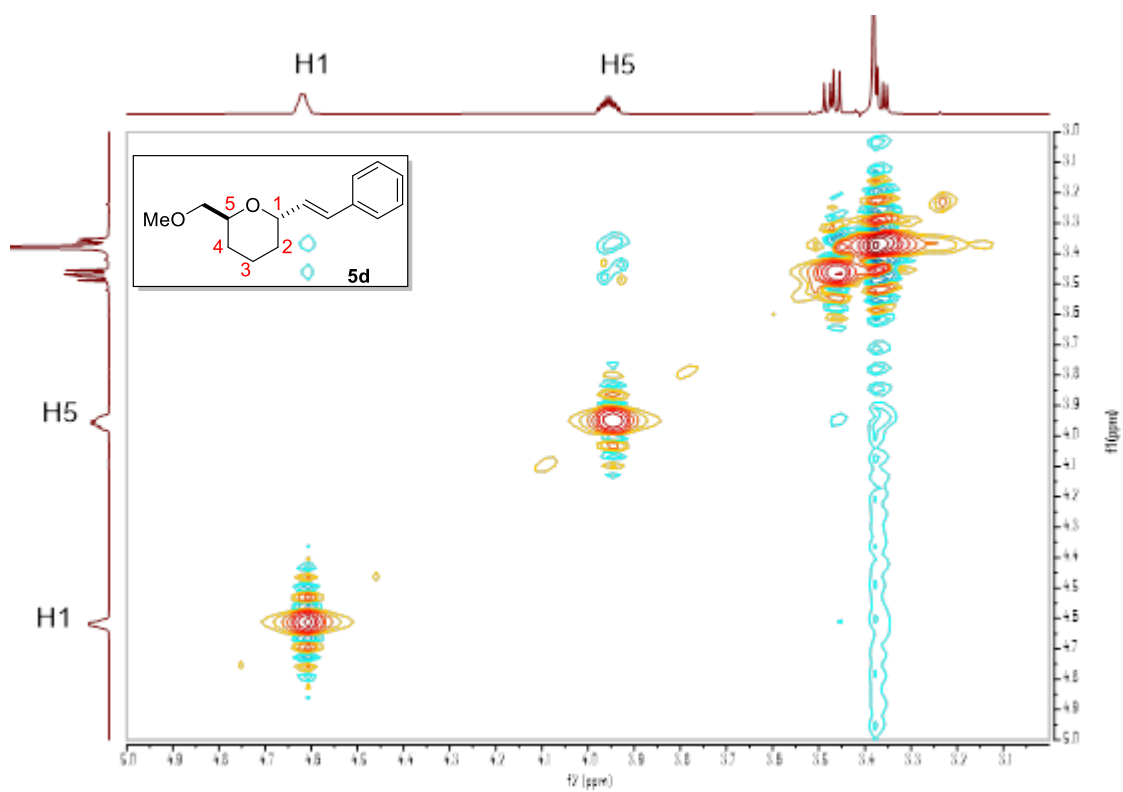

Figure S4:  $^1\text{H}$   $^1\text{H}$  NOESY NMR spectrum of *5d*

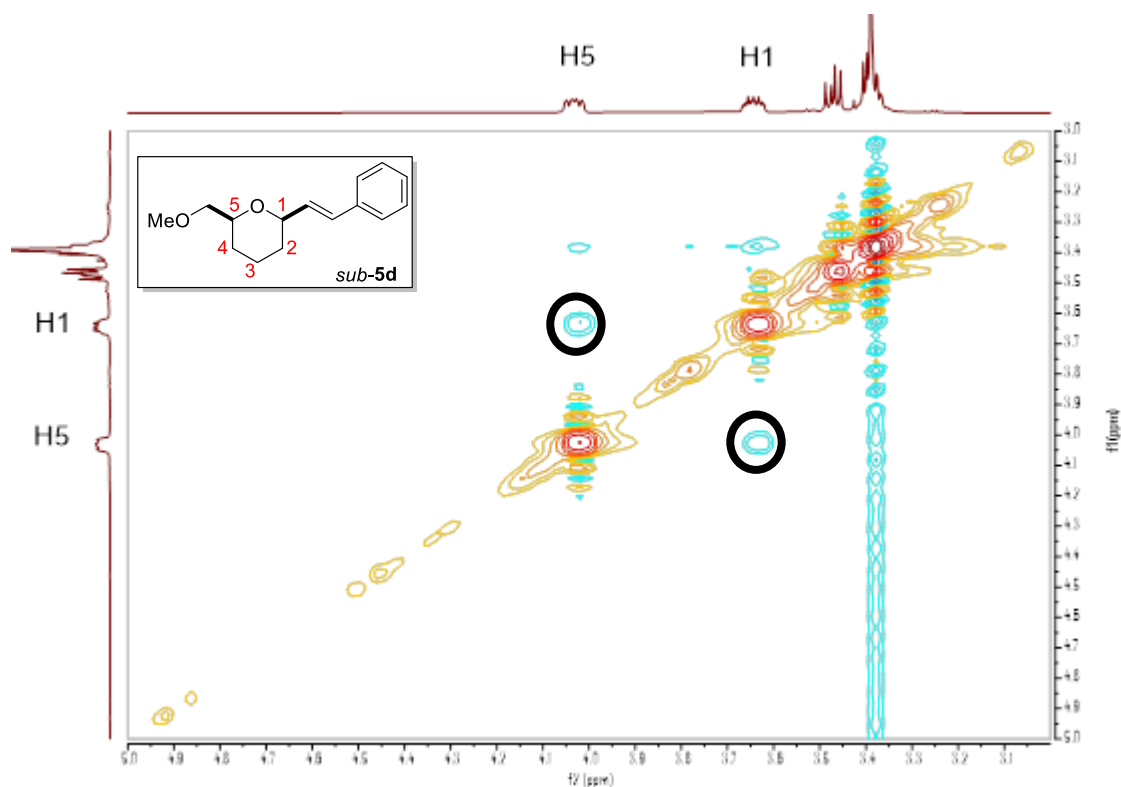

**Figure S5:** <sup>1</sup>H <sup>1</sup>H NOESY NMR spectrum of *sub-5d*

Taking **5d'** as an illustration, we showed the determination details of the d.r. ratios and configurations by means of HPLC and <sup>1</sup>H <sup>1</sup>H COSY NMR. Upon completion, the reaction was concentrated in vacuo and purified by preparative TLC to give the crude product and then determined by HPLC (Figure S6). Then, it was further purified by column chromatography to afford the pure product **5d'** and *sub-5d'*, and the NMR spectrum and HPLC determination of them were obtained respectively (Figure S7-10). By comparing the peak time and the integration of the signals of compounds **5d'** and *sub-5d'*, the d.r. ratio is about 6.69:1. As for the configurations, no obvious signals between H1 and H5 have been represented in <sup>1</sup>H <sup>1</sup>H COSY NMR of **5d'**, but *sub-5d'* does, so H1 and H5 of **5d'** were on the different sides of the six-membered ring. In the same way, the d.r. ratios and configurations of **5e'**, **5f'** were also determined.

| SAMPLE INFORMATION |                          |                     |                      |
|--------------------|--------------------------|---------------------|----------------------|
| Sample Name:       | 1017MIX                  | Acquired By:        | System               |
| Sample Type:       | Unknown                  | Sample Set Name:    | 1                    |
| Vial:              | 1:B,1                    | Acq. Method Set:    | 100298               |
| Injection #:       | 1                        | Processing Method:  | 00                   |
| Injection Volume:  | 10.00 ul                 | Channel Name:       | 2998 Ch1 254nm@4.8nm |
| Run Time:          | 20.0 Minutes             | Proc. Chnl. Descr.: | 2998 Ch1 254nm@4.8nm |
| Date Acquired:     | 2/29/2024 5:59:54 AM CST |                     |                      |
| Date Processed:    | 2/29/2024 7:29:50 AM CST |                     |                      |

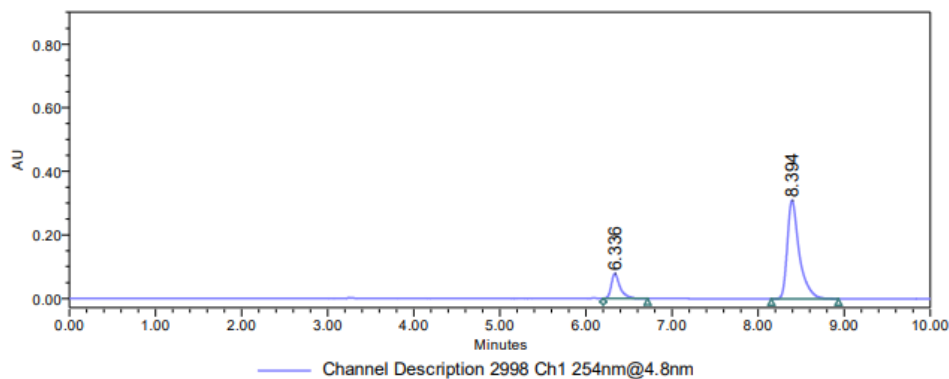

|   | Retention Time (min) | Int Type | Width (sec) | Area (μV*sec) | Height (μV) | % Area |
|---|----------------------|----------|-------------|---------------|-------------|--------|
| 1 | 6.34                 | VB       | 31.00       | 552802        | 78260       | 15.69  |
| 2 | 8.39                 | BB       | 46.90       | 2971441       | 309178      | 84.31  |

**Figure S6:** HPLC determination of the crude product

| SAMPLE INFORMATION |                          |                     |                      |
|--------------------|--------------------------|---------------------|----------------------|
| Sample Name:       | 1017-2                   | Acquired By:        | System               |
| Sample Type:       | Unknown                  | Sample Set Name:    | 1                    |
| Vial:              | 1:B,3                    | Acq. Method Set:    | 100298               |
| Injection #:       | 1                        | Processing Method:  | 00                   |
| Injection Volume:  | 10.00 ul                 | Channel Name:       | 2998 Ch1 254nm@4.8nm |
| Run Time:          | 20.0 Minutes             | Proc. Chnl. Descr.: | 2998 Ch1 254nm@4.8nm |
| Date Acquired:     | 2/29/2024 6:41:23 AM CST |                     |                      |
| Date Processed:    | 2/29/2024 7:32:53 AM CST |                     |                      |

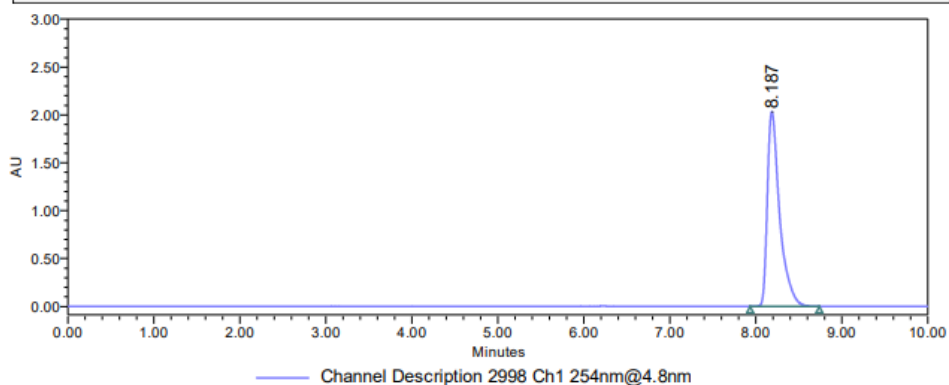

|   | Retention Time (min) | Int Type | Width (sec) | Area (μV*sec) | Height (μV) | % Area |
|---|----------------------|----------|-------------|---------------|-------------|--------|
| 1 | 8.19                 | bb       | 48.20       | 20187432      | 2032432     | 100.00 |

**Figure S7:** HPLC determination of 5d'

| SAMPLE INFORMATION |                          |                     |                      |
|--------------------|--------------------------|---------------------|----------------------|
| Sample Name:       | 1017-1                   | Acquired By:        | System               |
| Sample Type:       | Unknown                  | Sample Set Name:    | 1                    |
| Vial:              | 1:B,2                    | Acq. Method Set:    | 100298               |
| Injection #:       | 1                        | Processing Method:  | 00                   |
| Injection Volume:  | 10.00 ul                 | Channel Name:       | 2998 Ch1 254nm@4.8nm |
| Run Time:          | 20.0 Minutes             | Proc. Chnl. Descr.: | 2998 Ch1 254nm@4.8nm |
| Date Acquired:     | 2/29/2024 6:20:38 AM CST |                     |                      |
| Date Processed:    | 2/29/2024 7:31:19 AM CST |                     |                      |

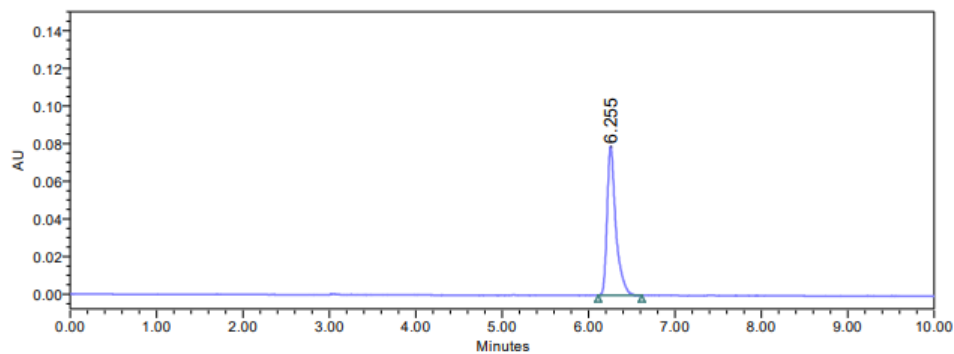

Channel Description 2998 Ch1 254nm@4.8nm

|   | Retention Time (min) | Int Type | Width (sec) | Area (μV*sec) | Height (μV) | % Area |
|---|----------------------|----------|-------------|---------------|-------------|--------|
| 1 | 6.26                 | BB       | 30.30       | 555952        | 79133       | 100.00 |

Figure S8: HPLC determination of *sub-5d'*

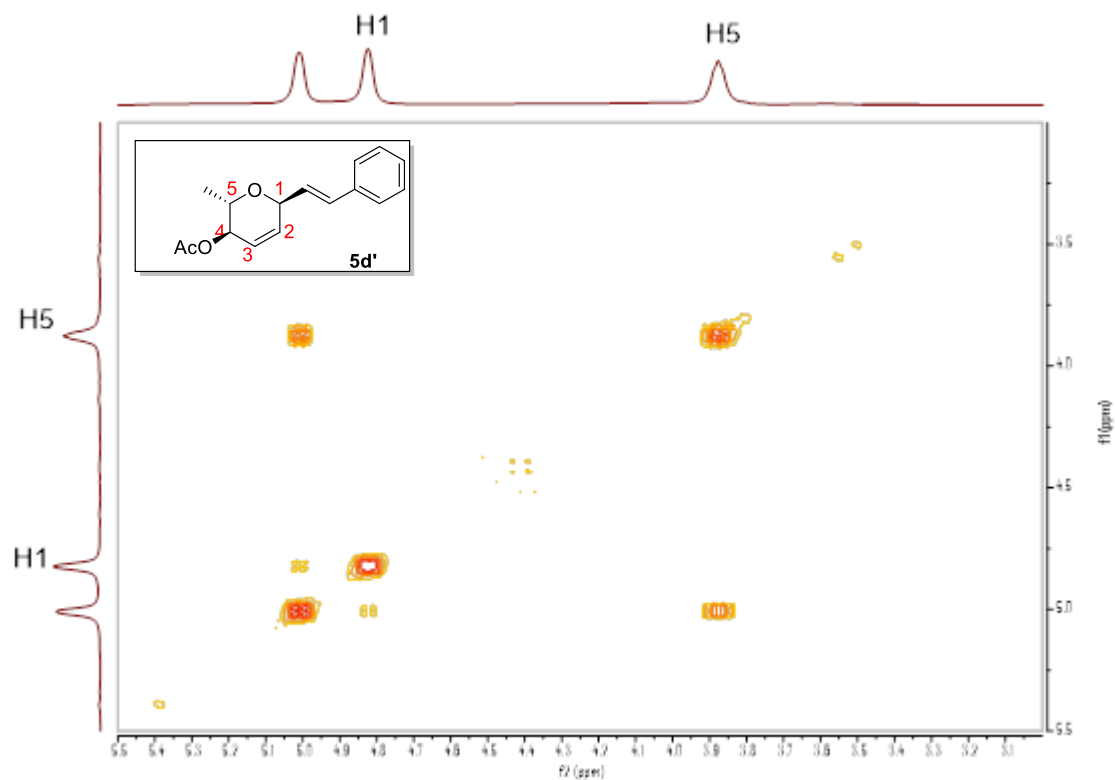

Figure S9:  $^1\text{H}$   $^1\text{H}$  COSY NMR spectrum of **5d'**

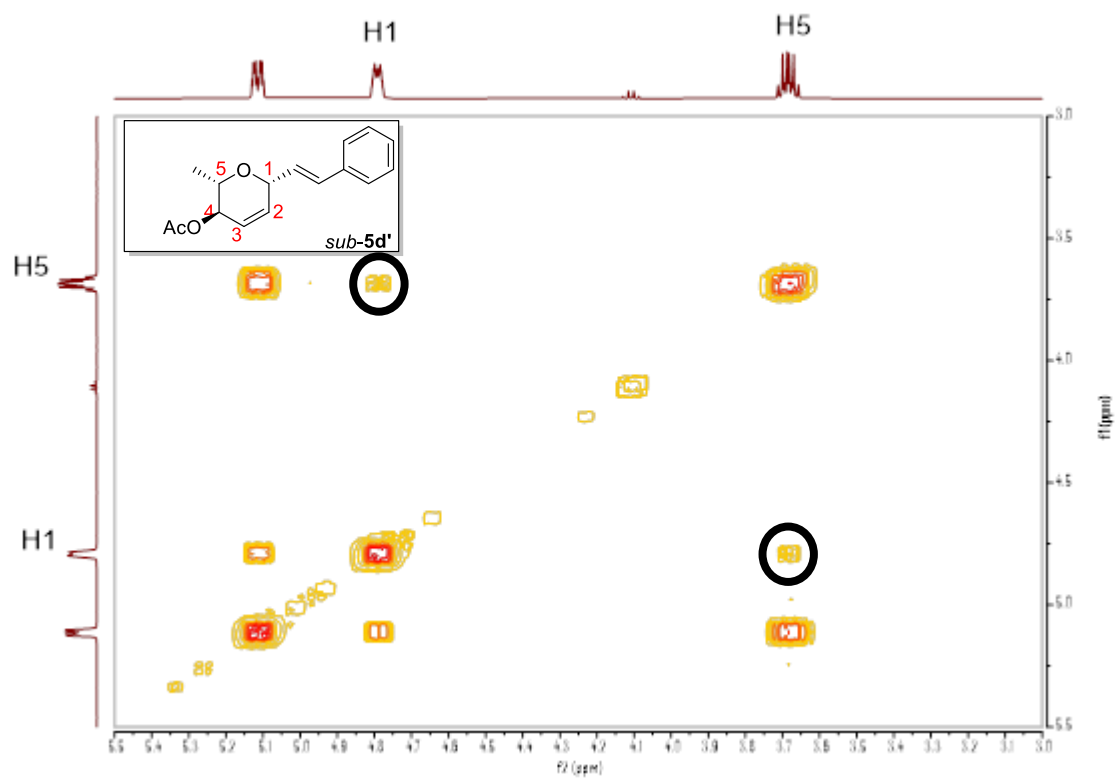

Figure S10:  $^1\text{H}$   $^1\text{H}$  COSY NMR spectrum of *sub-5d'*

## 10. NMR Spectroscopic Data

### Potassium (E)-trifluoro(styryl)borate (2a)

$^1\text{H}$  spectrum (500 MHz, DMSO- $d_6$ )

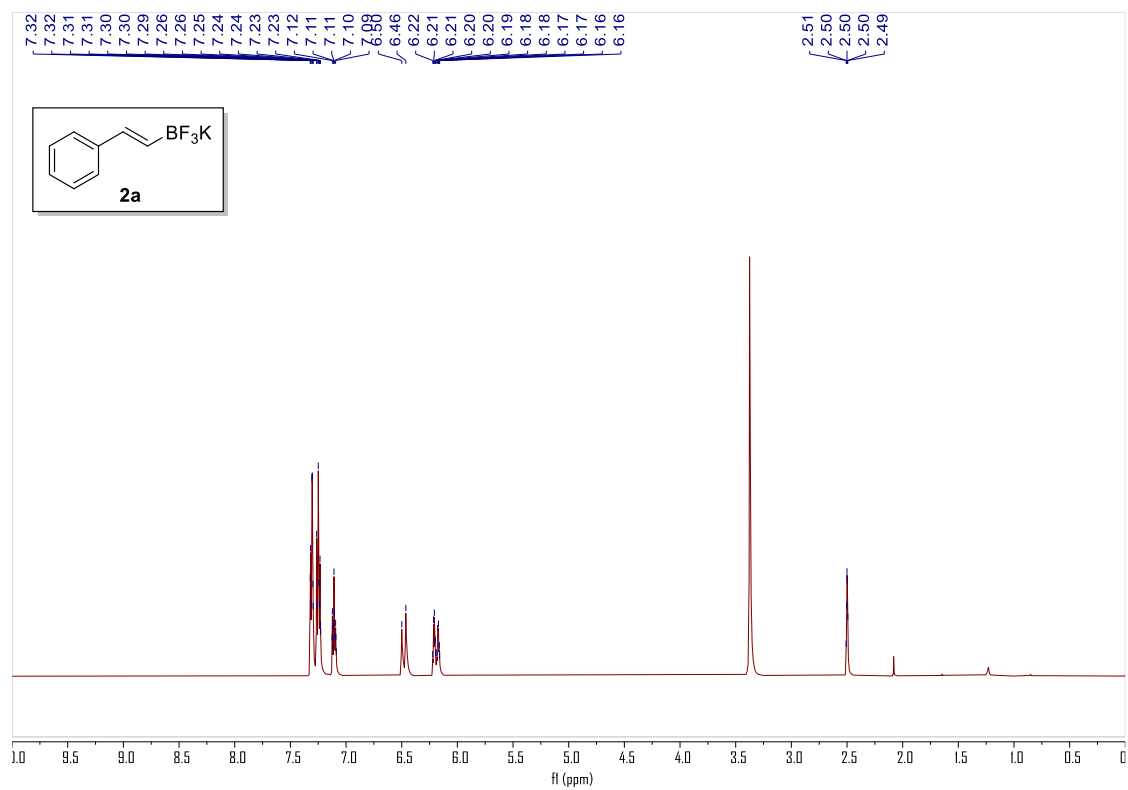

### Potassium (E)-trifluoro(4-methylstyryl)borate (2b)

<sup>1</sup>H spectrum (500 MHz, DMSO-d6)

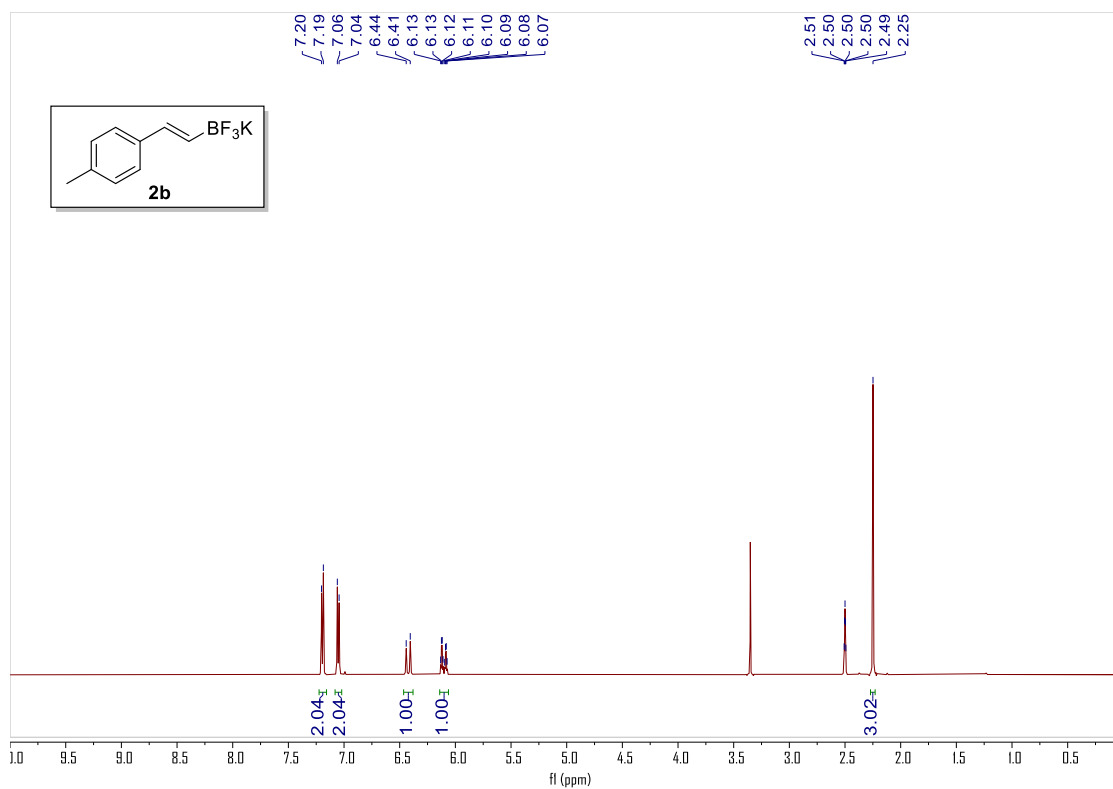

### Potassium (E)-(4-(tert-butyl)styryl)trifluoroborate (2c)

<sup>1</sup>H spectrum (500 MHz, DMSO-d6)

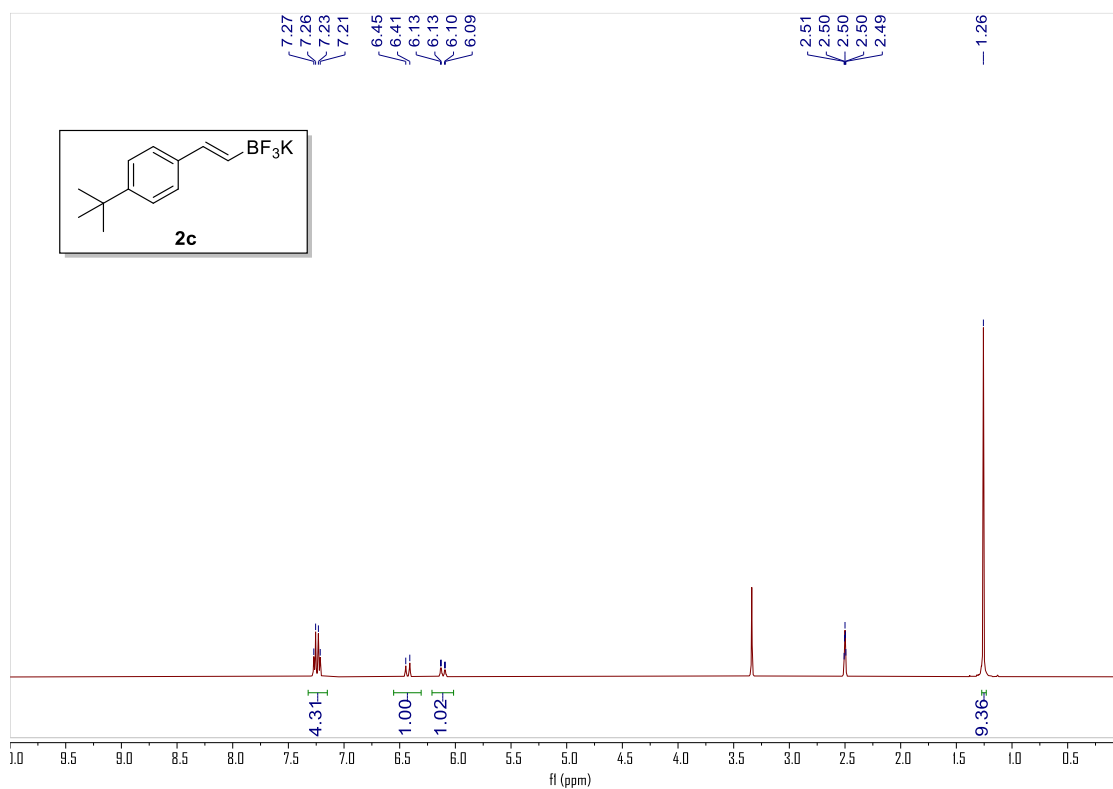



### Potassium (E)-trifluoro(4-methoxystyryl)borate (2d)

<sup>1</sup>H spectrum (500 MHz, DMSO-d<sub>6</sub>)

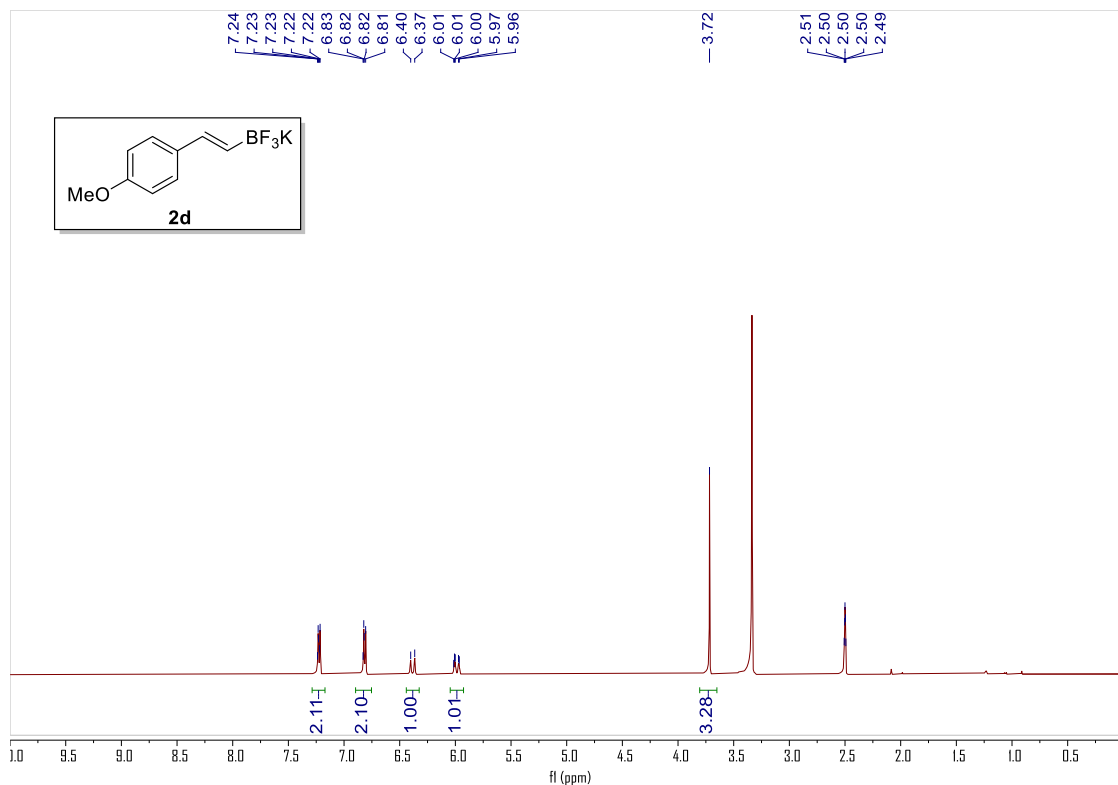

### Potassium (E)-(2-([1,1'-biphenyl]-4-yl)vinyl)trifluoroborate (2e)

<sup>1</sup>H spectrum (500 MHz, DMSO-d<sub>6</sub>)

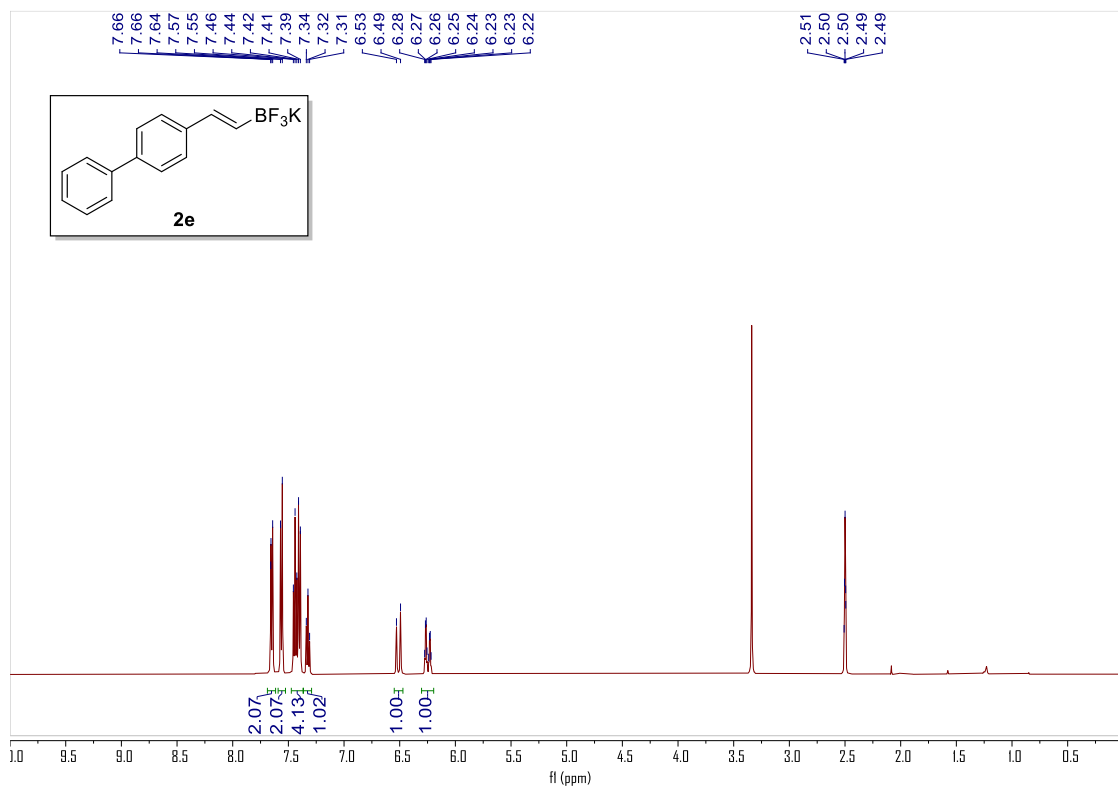

### Potassium (E)-trifluoro(4-(trifluoromethoxy)styryl)borate (2f)

<sup>1</sup>H spectrum (500 MHz, DMSO-d<sub>6</sub>)

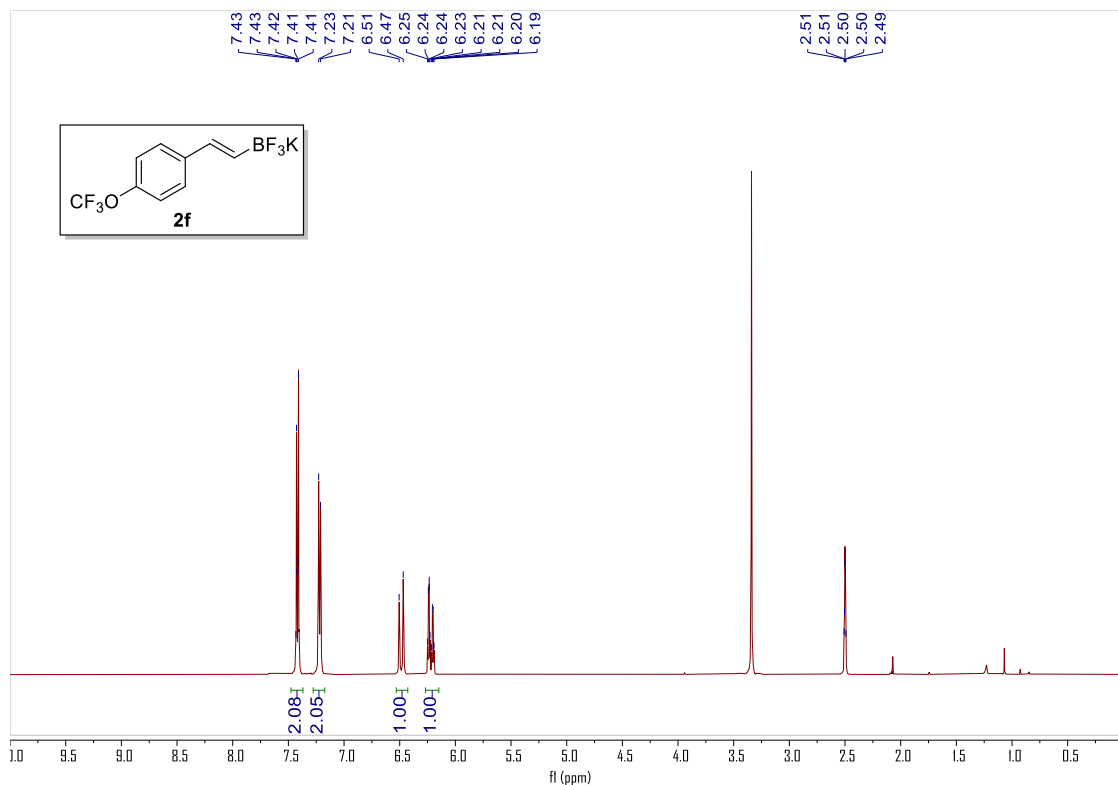

### Potassium (E)-trifluoro(4-fluorostyryl)borate (2g)

<sup>1</sup>H spectrum (500 MHz, DMSO-d<sub>6</sub>)

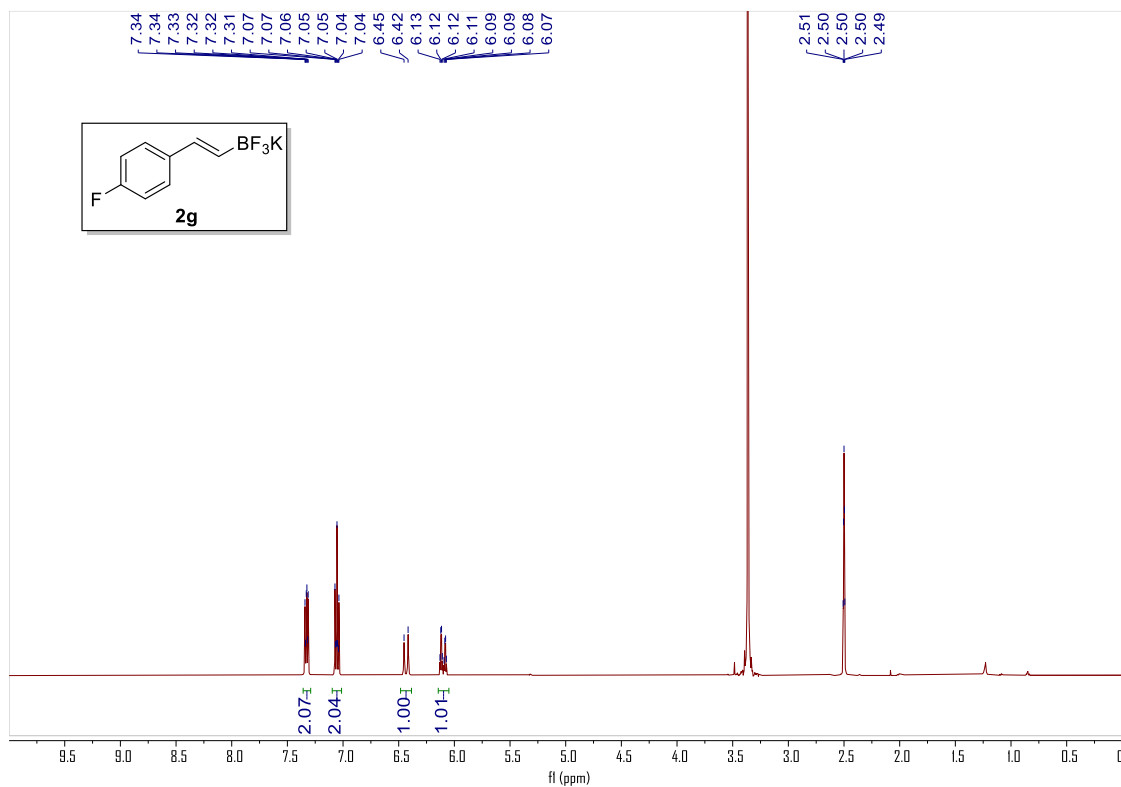

### Potassium (E)-(4-chlorostyryl)trifluoroborate (2h)

<sup>1</sup>H spectrum (500 MHz, DMSO-d6)

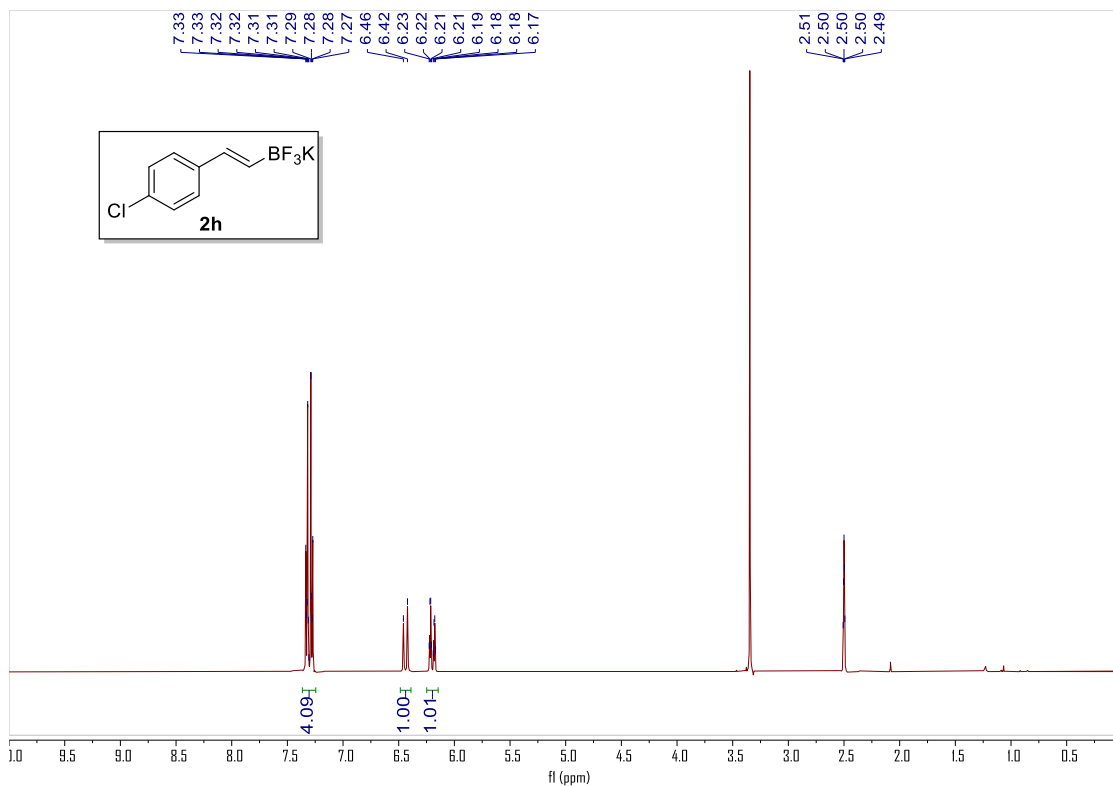

### Potassium (E)-(4-bromostyryl)trifluoroborate (2i)

<sup>1</sup>H spectrum (500 MHz, DMSO-d6)

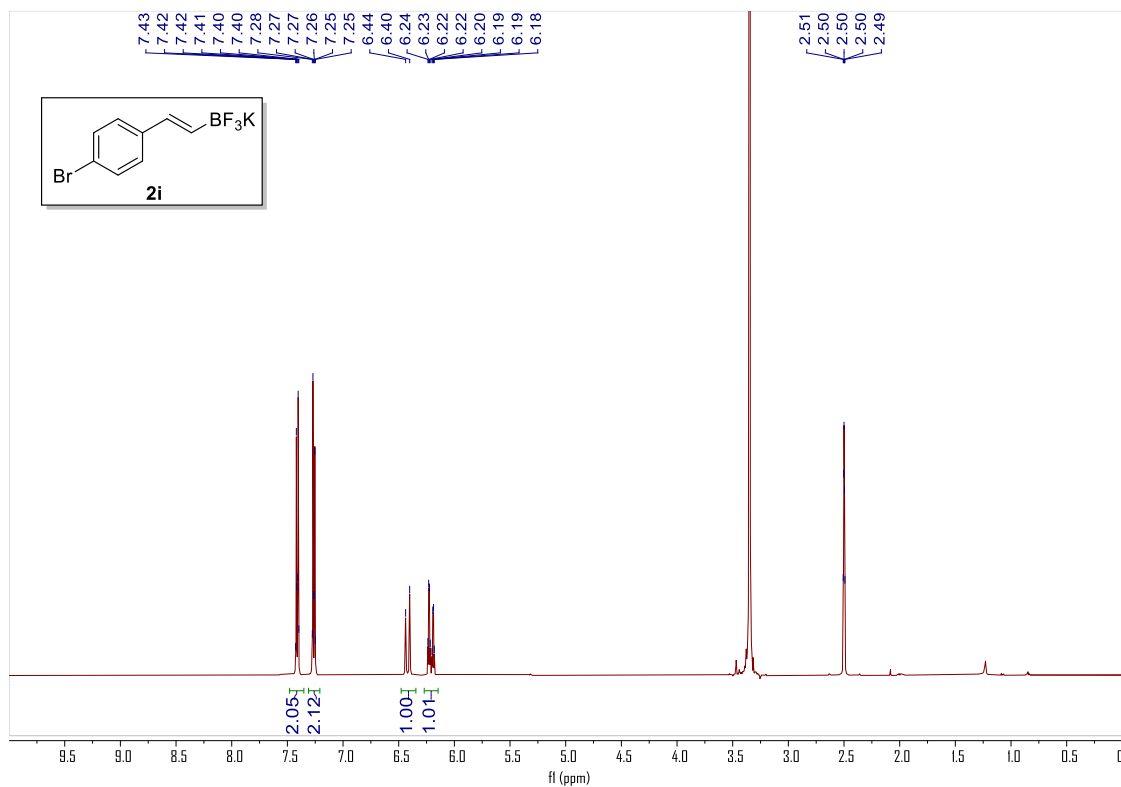

### Potassium (E)-trifluoro(3-methoxystyryl)borate (2j)

<sup>1</sup>H spectrum (500 MHz, DMSO-d<sub>6</sub>)

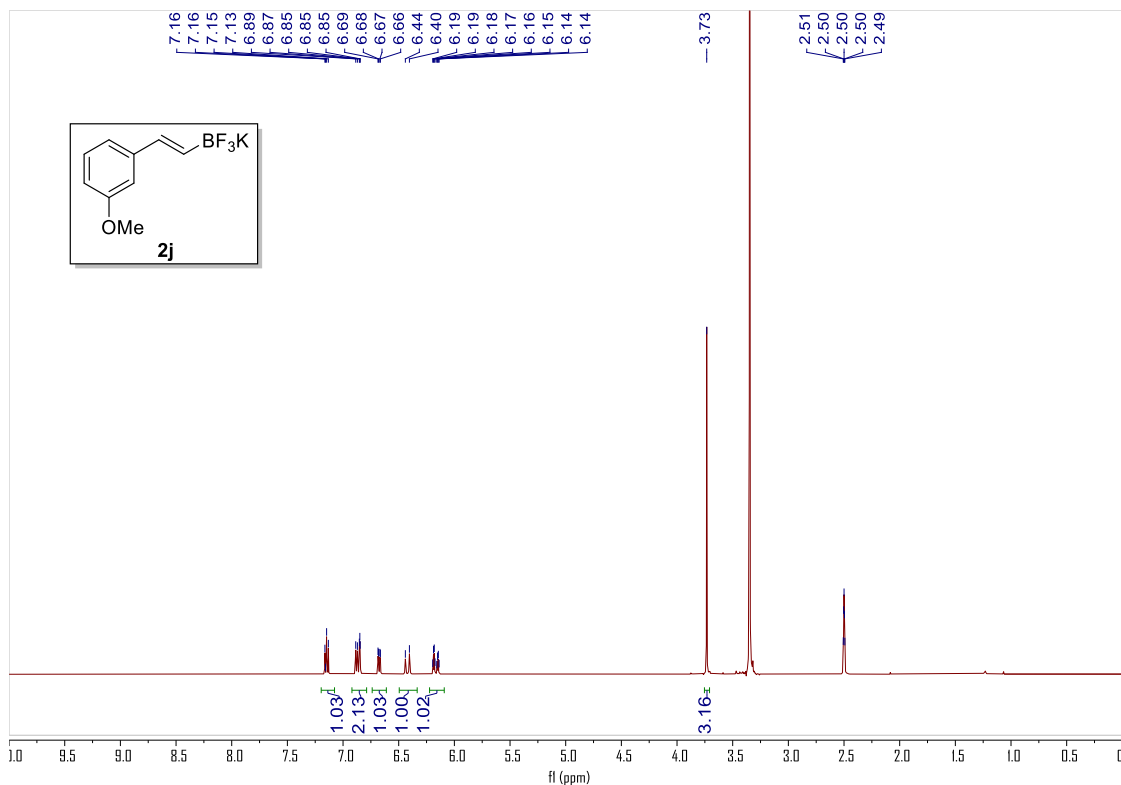

### Potassium (E)-trifluoro(2-methoxystyryl)borate (2k)

<sup>1</sup>H spectrum (500 MHz, DMSO-d<sub>6</sub>)

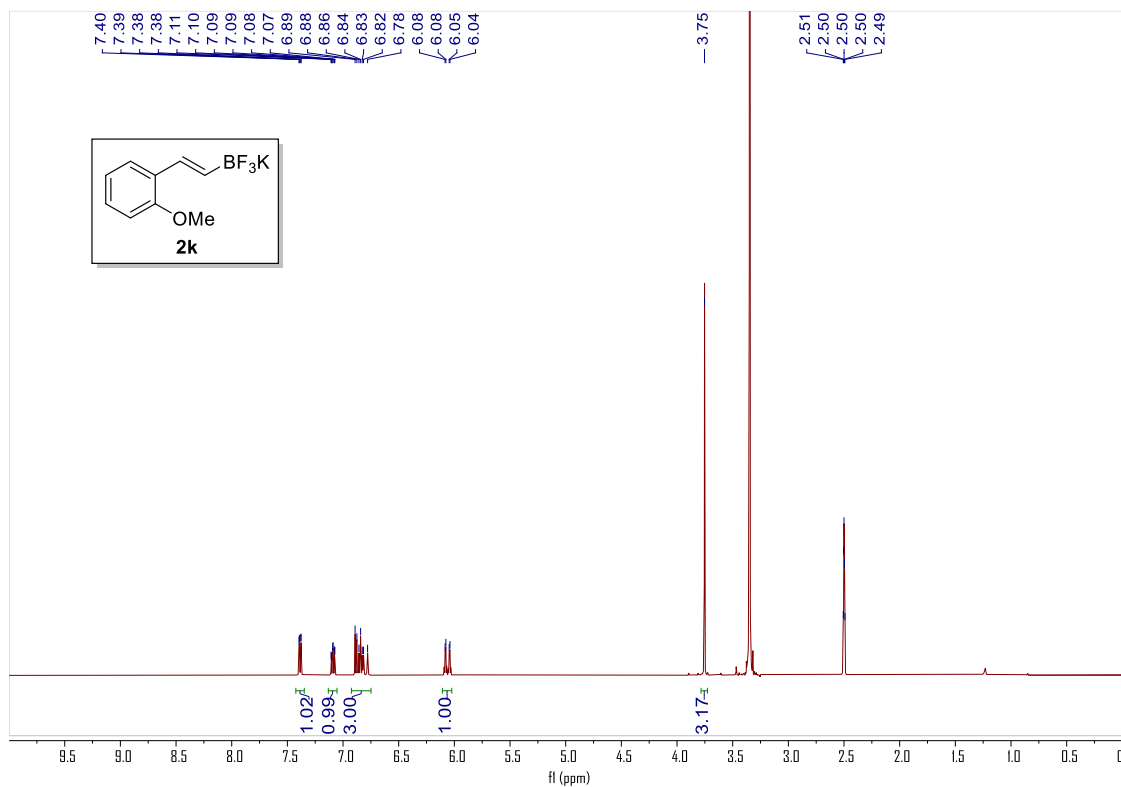

### Potassium (E)-trifluoro(2-(naphthalen-1-yl)vinyl)borate (2l)

<sup>1</sup>H spectrum (500 MHz, DMSO-d6)

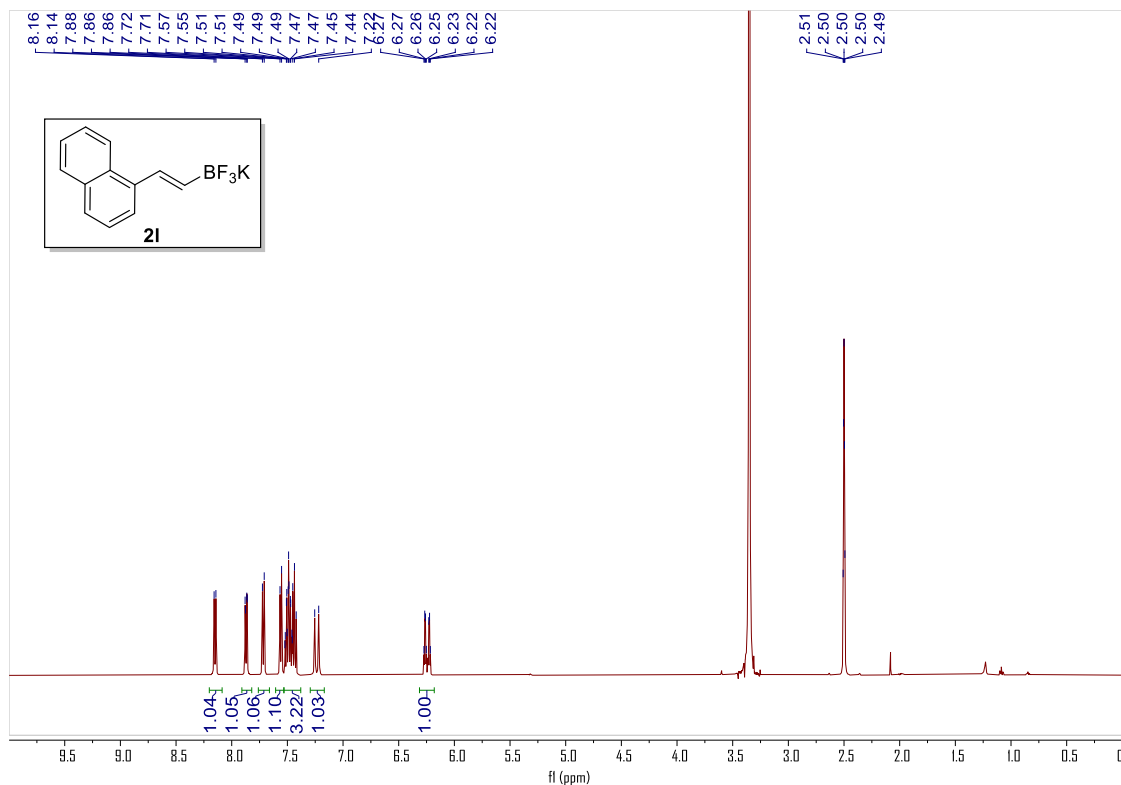

### Potassium (E)-trifluoro(2-(thiophen-2-yl)vinyl)borate (2m)

<sup>1</sup>H spectrum (500 MHz, DMSO-d6)

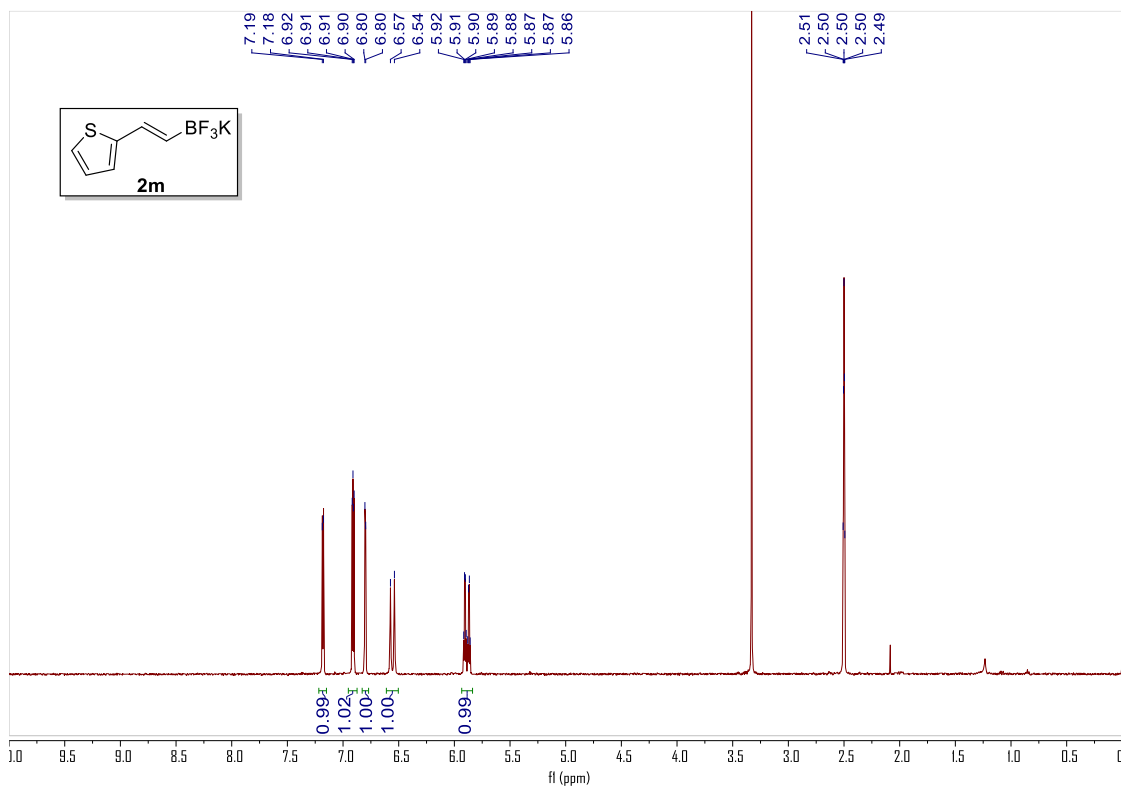

### Potassium (E)-trifluoro(2-(thiophen-3-yl)vinyl)borate (2n)

<sup>1</sup>H spectrum (500 MHz, DMSO-d<sub>6</sub>)

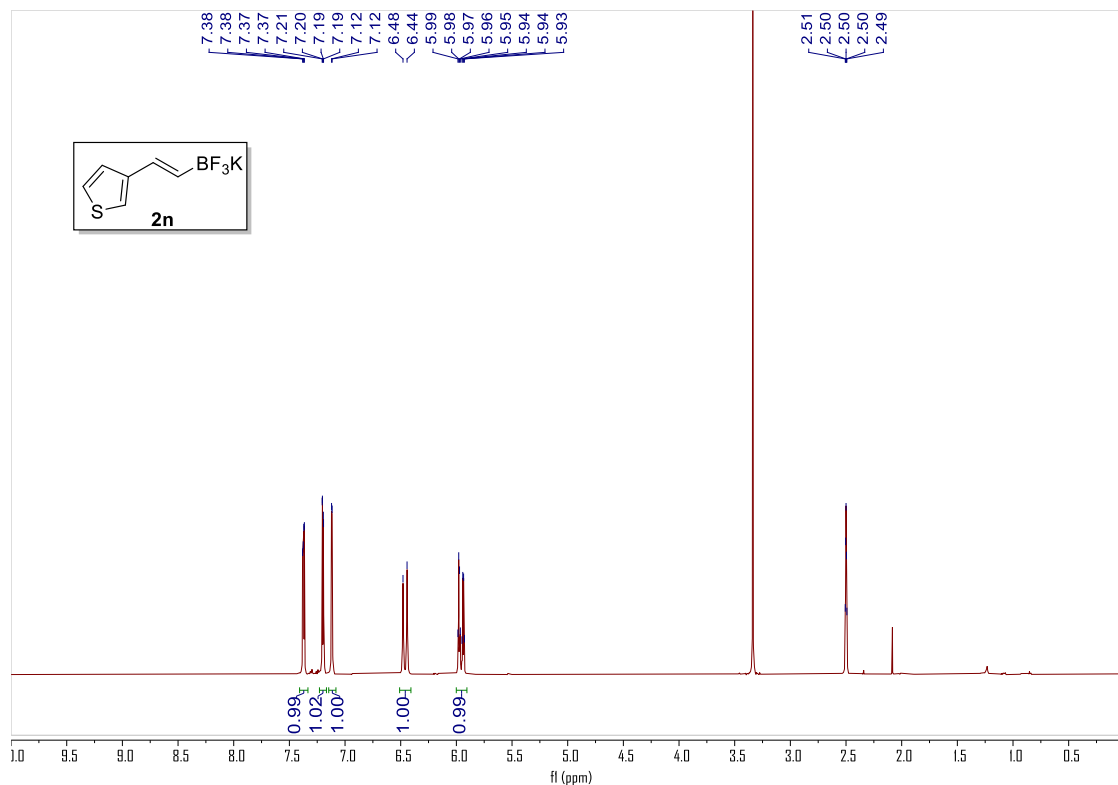

### Potassium (E)-(2-cyclopropylvinyl)trifluoroborate (2o)

<sup>1</sup>H spectrum (500 MHz, DMSO-d<sub>6</sub>)

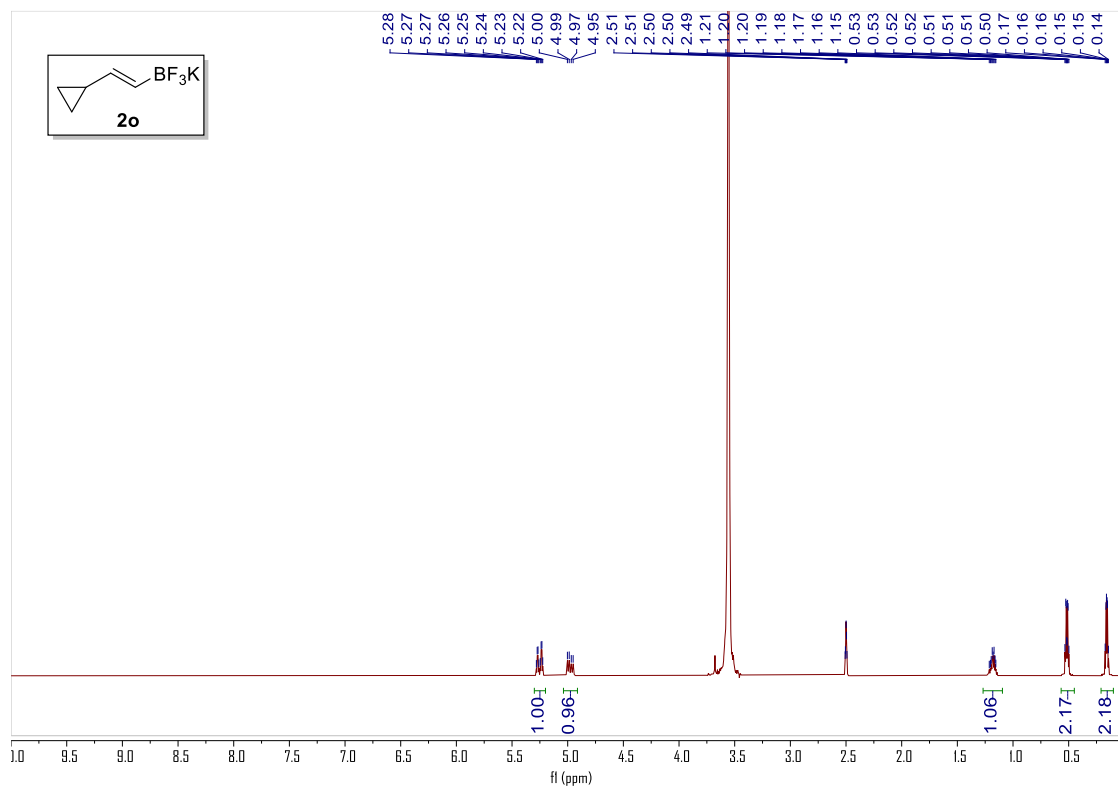



## Potassium trifluoro(4-methoxyphenyl)borate (2r)

$^1\text{H}$  spectrum (500 MHz, Acetone- $d_6$ )

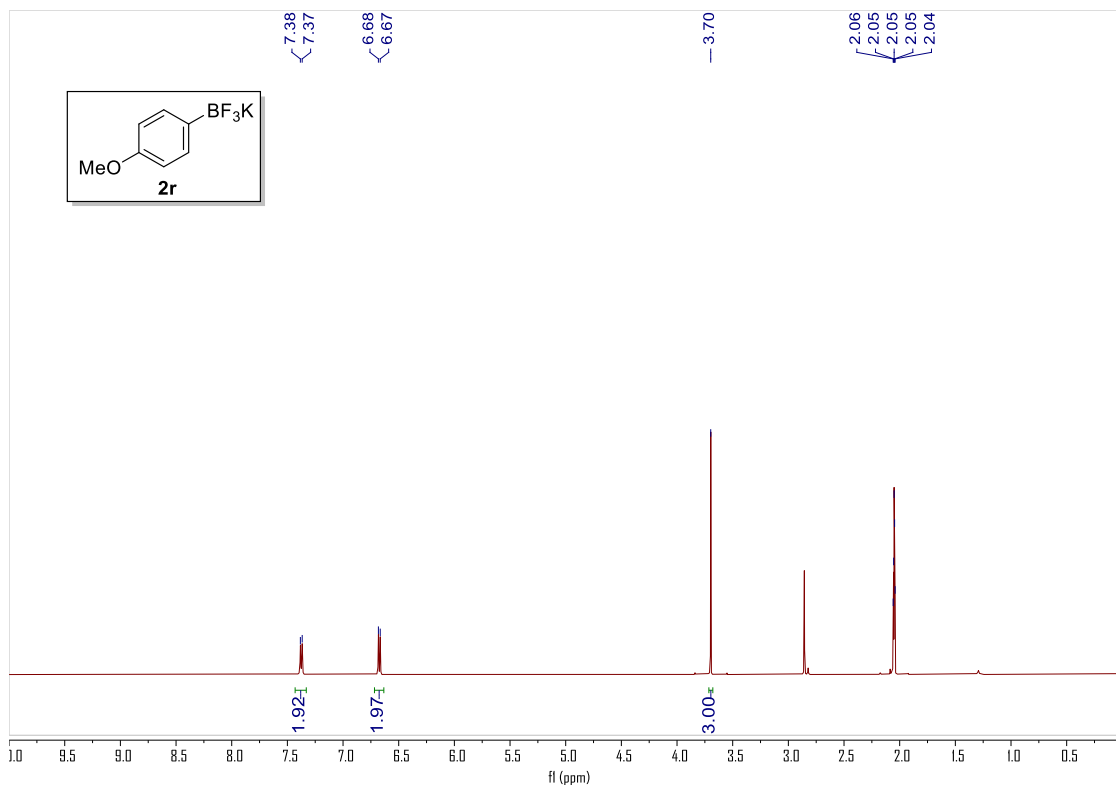

## Potassium (E)-trifluoro(hex-1-en-1-yl)borate (2s)

$^1\text{H}$  spectrum (500 MHz, DMSO- $d_6$ )

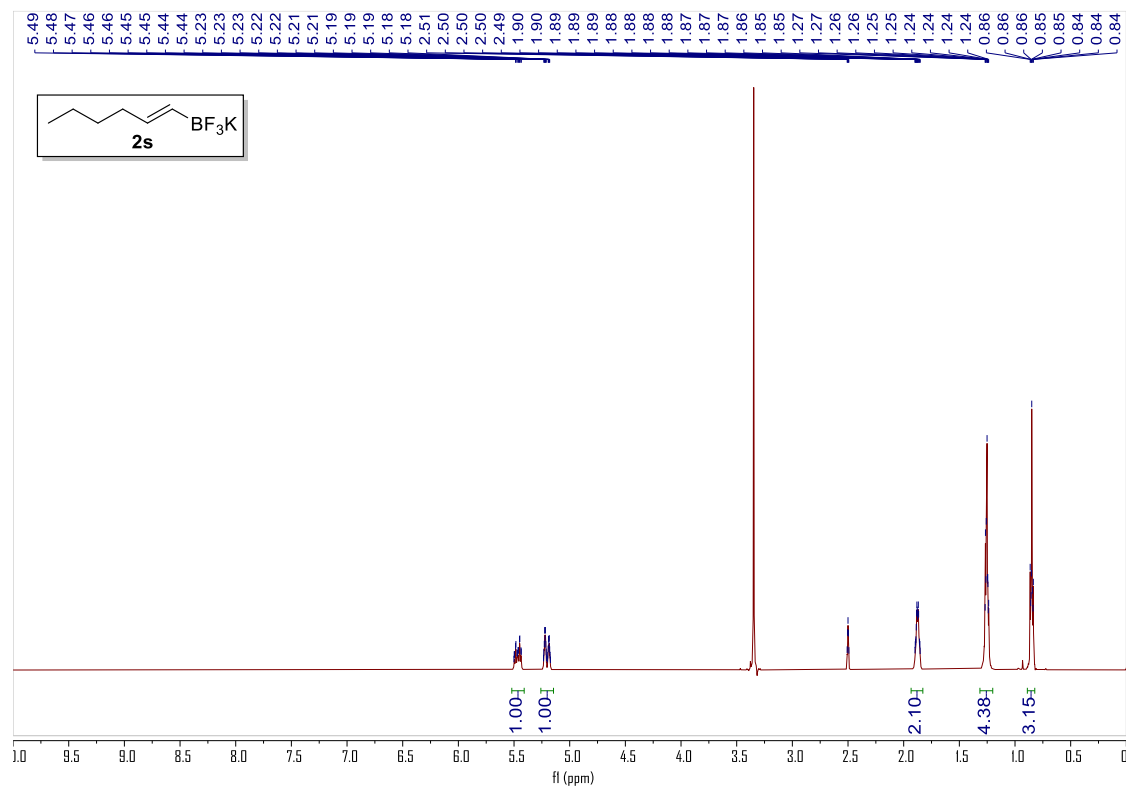





<sup>13</sup>C spectrum (126 MHz, CDCl<sub>3</sub>)

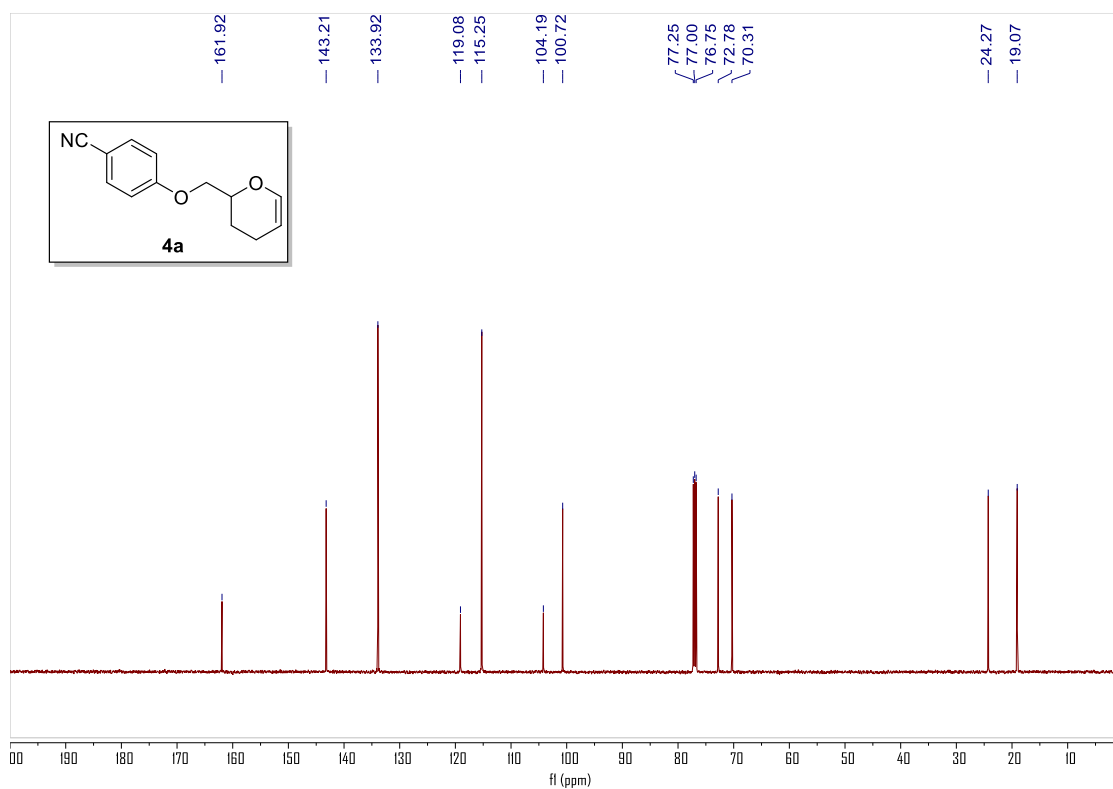

2-((4-ethylphenoxy)methyl)-3,4-dihydro-2H-pyran (**4b**)

<sup>1</sup>H spectrum (500 MHz, CDCl<sub>3</sub>)

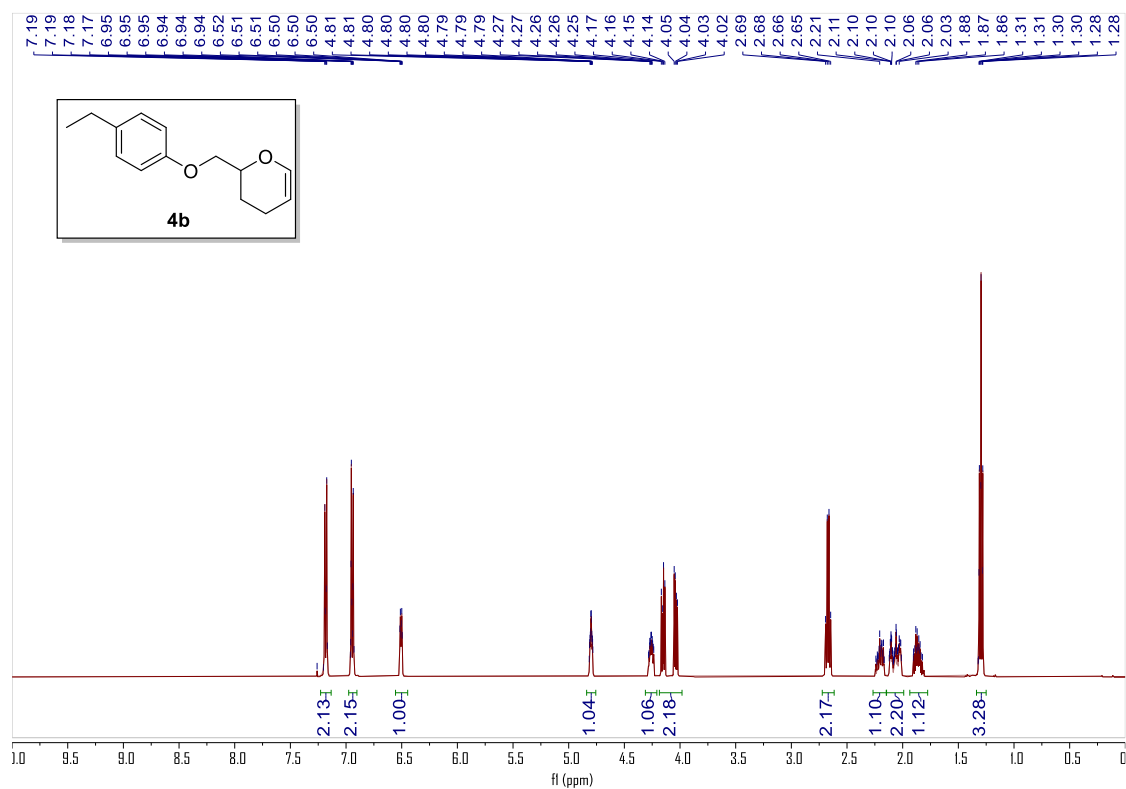

<sup>13</sup>C spectrum (126 MHz, CDCl<sub>3</sub>)

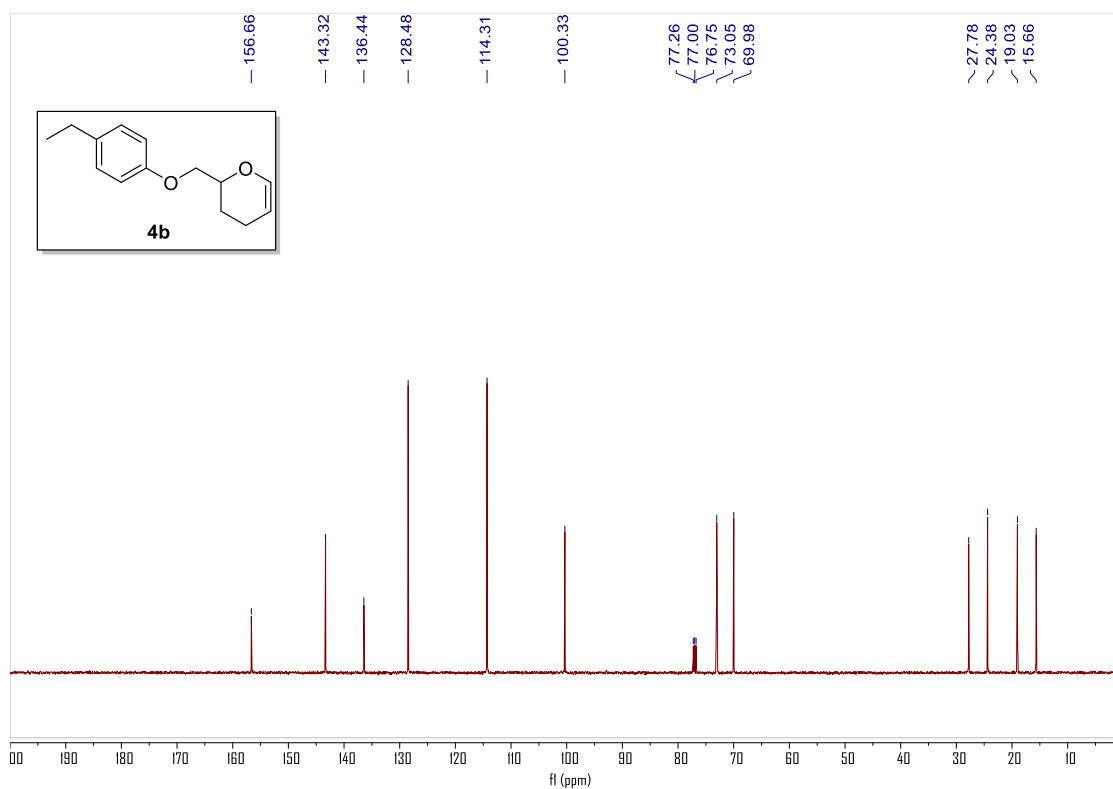

2-((benzyloxy)methyl)-3,4-dihydro-2H-pyran (**4c**)

<sup>1</sup>H spectrum (500 MHz, CDCl<sub>3</sub>)

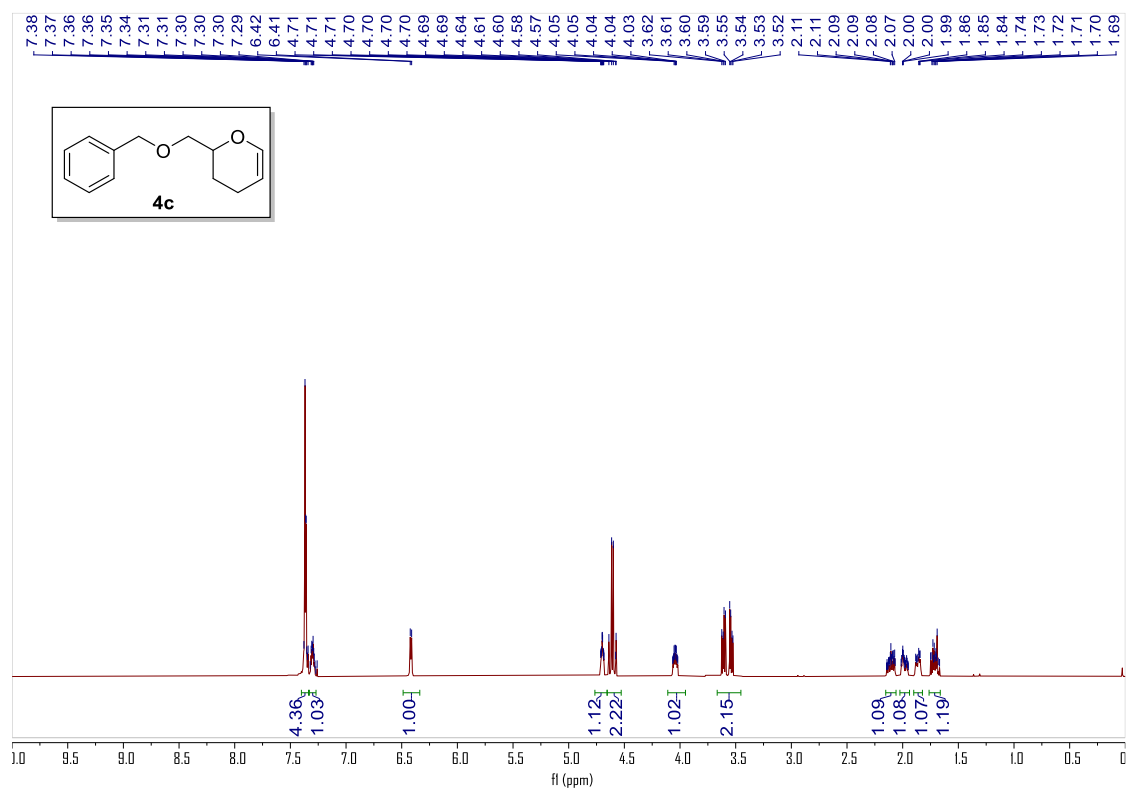

## 2-(methoxymethyl)-3,4-dihydro-2H-pyran (4d)

$^1\text{H}$  spectrum (500 MHz,  $\text{CDCl}_3$ )

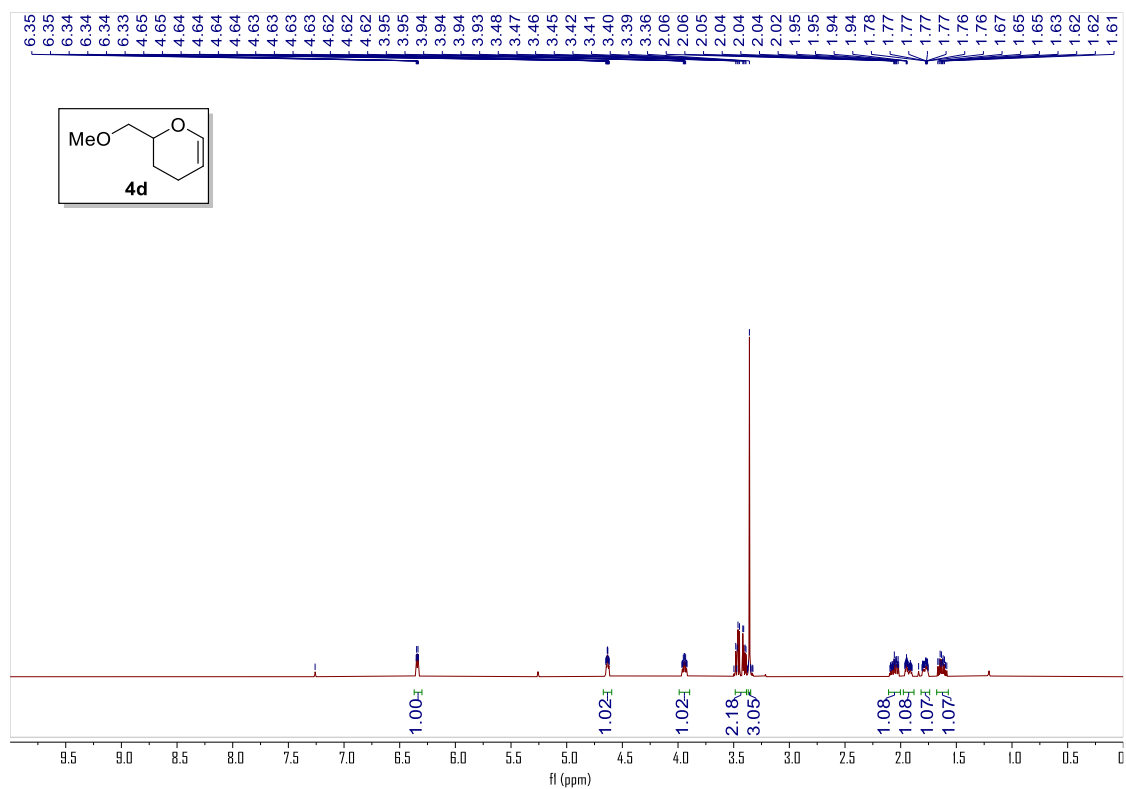

## 2-(((4-methylbenzyl)oxy)methyl)-3,4-dihydro-2H-pyran (4e)

$^1\text{H}$  spectrum (500 MHz,  $\text{CDCl}_3$ )

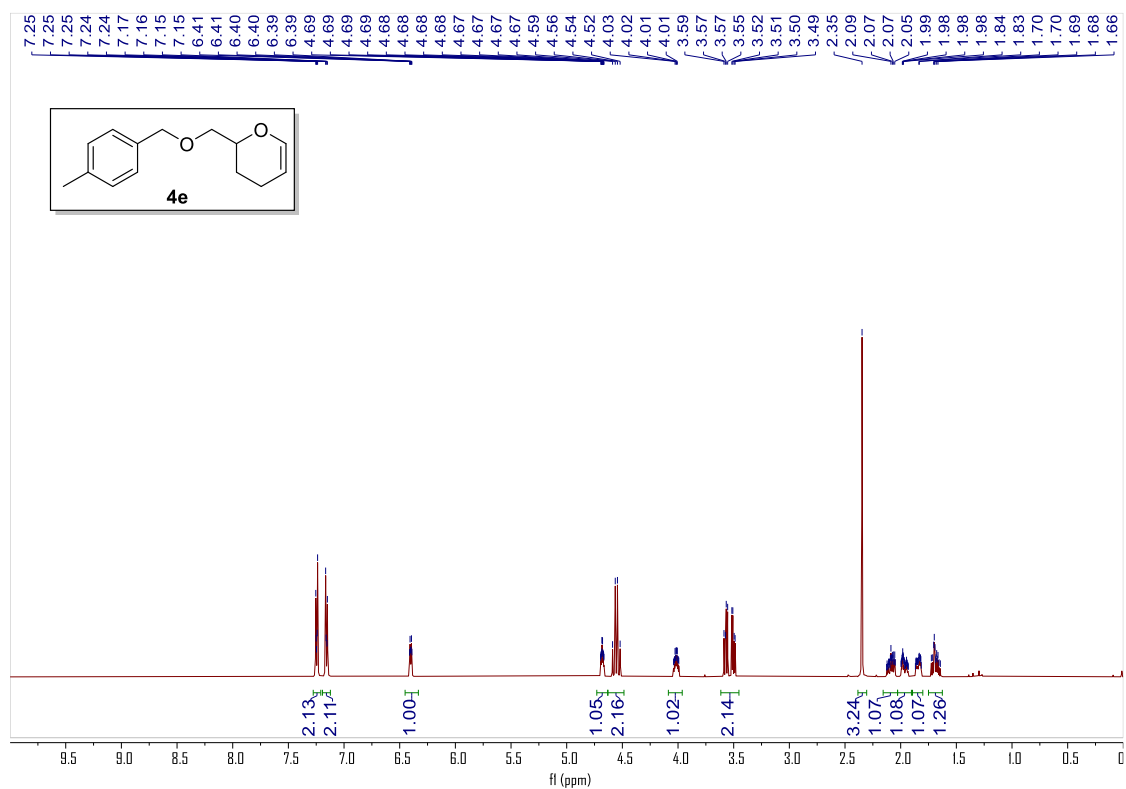

<sup>13</sup>C spectrum (126 MHz, CDCl<sub>3</sub>)

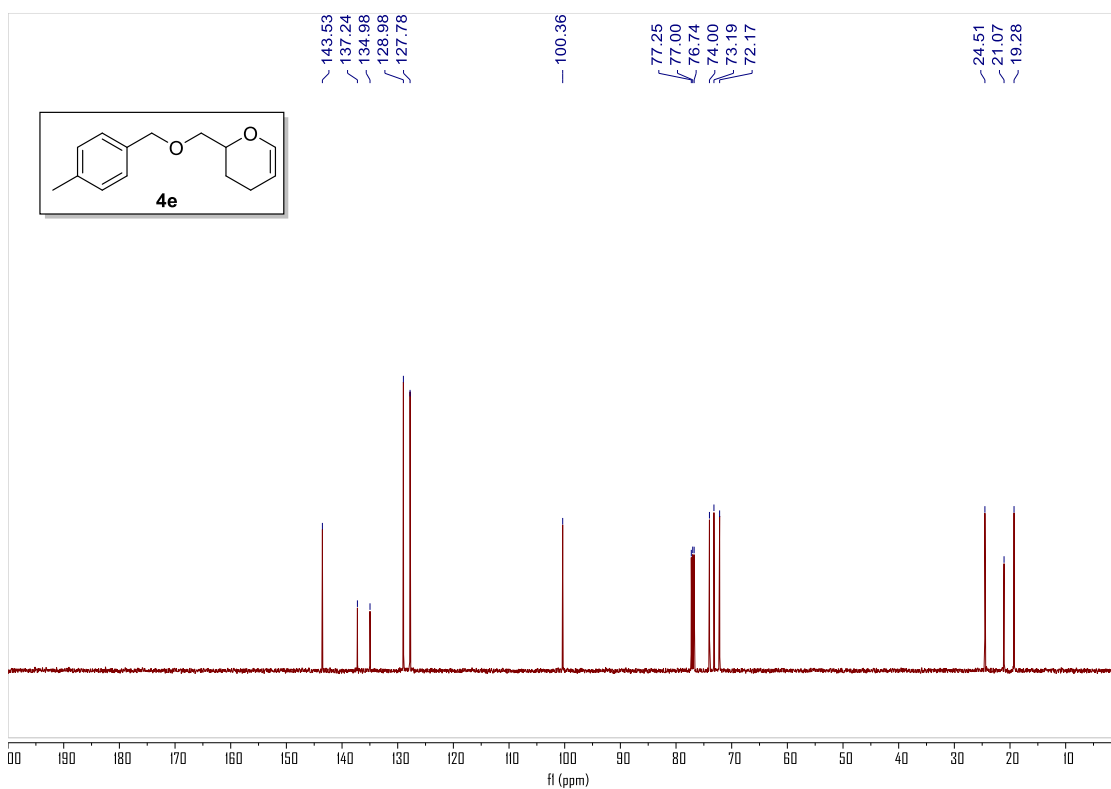

2-((([1,1'-biphenyl]-4-ylmethoxy)methyl)-3,4-dihydro-2H-pyran (**4f**)

<sup>1</sup>H spectrum (500 MHz, CDCl<sub>3</sub>)

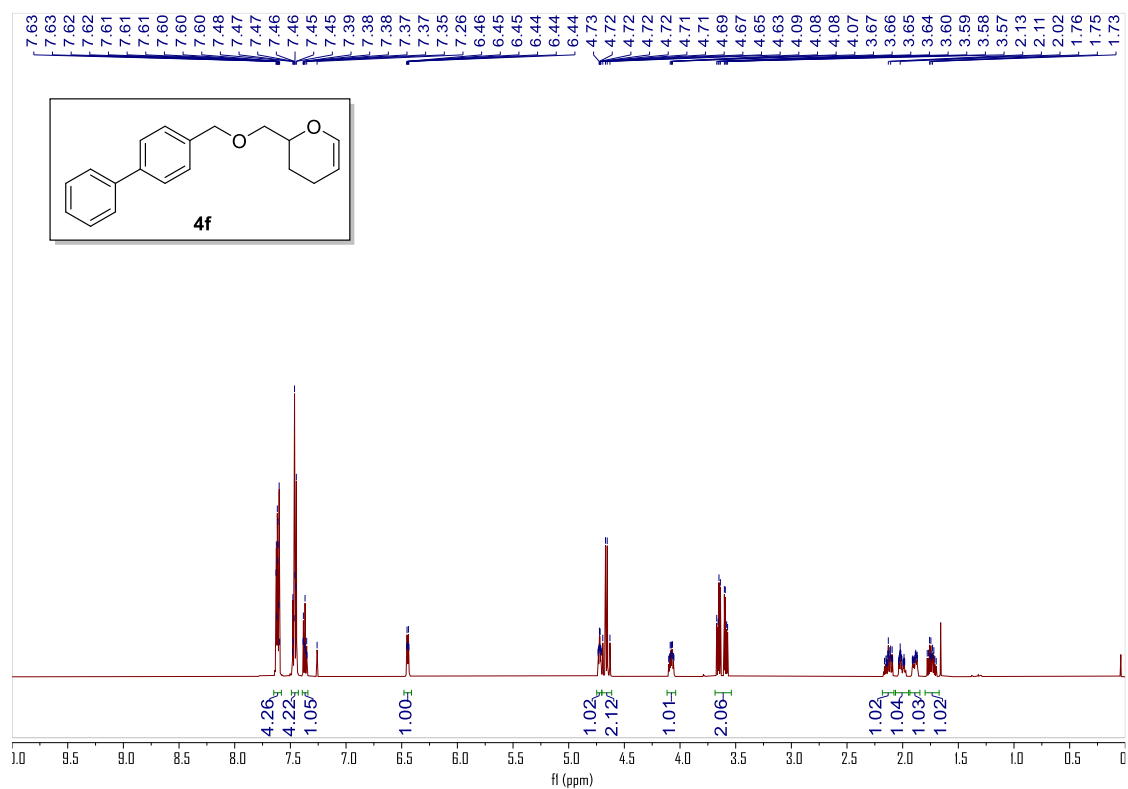

$^{13}\text{C}$  spectrum (126 MHz,  $\text{CDCl}_3$ )

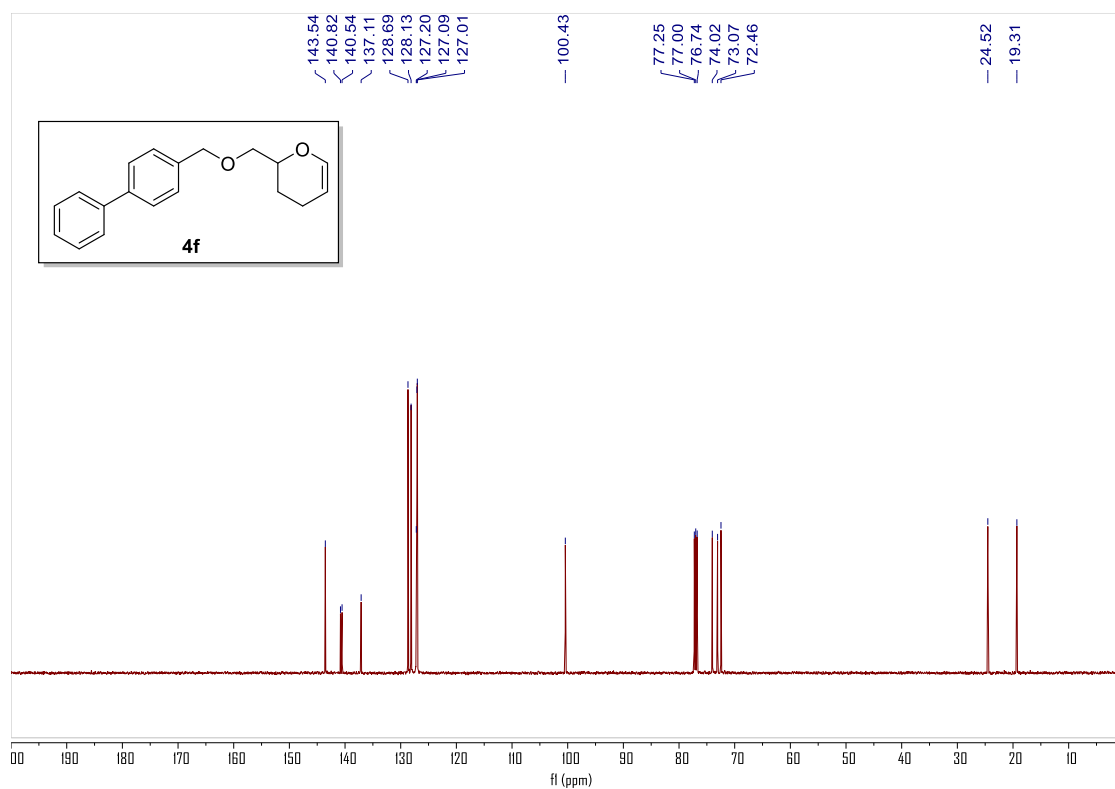

2-(((2-methylbenzyl)oxy)methyl)-3,4-dihydro-2H-pyran (**4g**)

$^1\text{H}$  spectrum (500 MHz,  $\text{CDCl}_3$ )

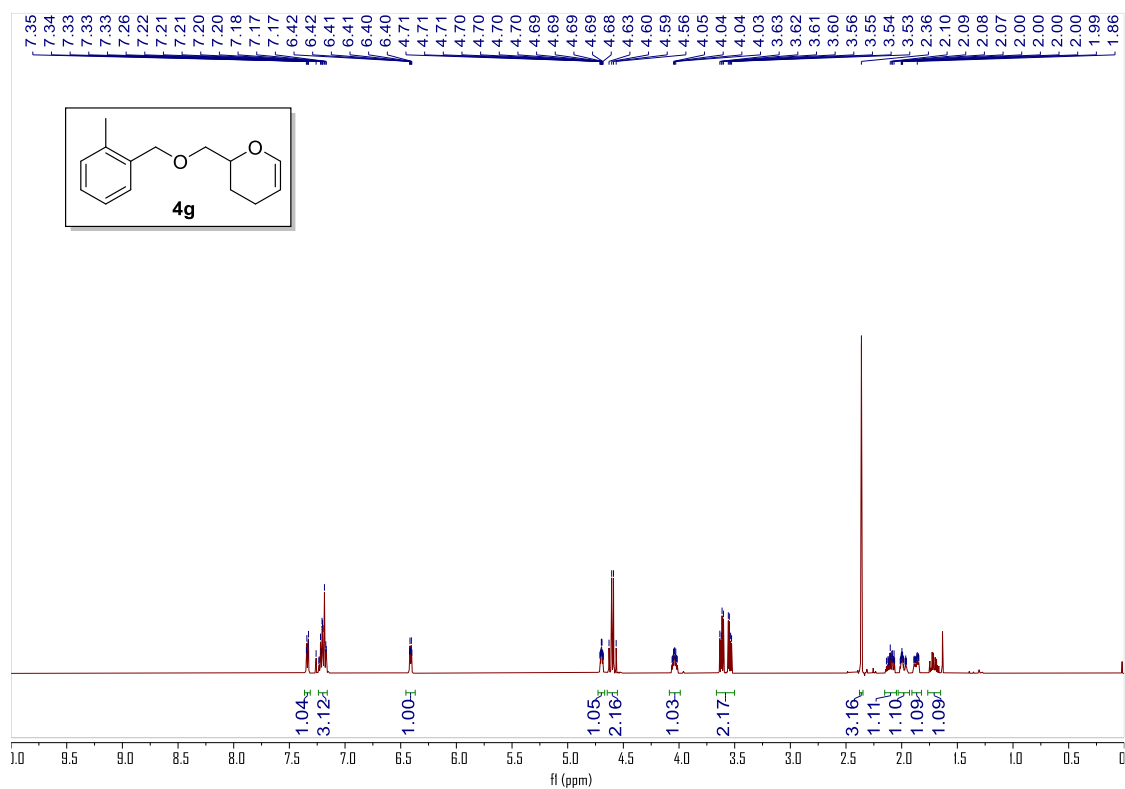

<sup>13</sup>C spectrum (126 MHz, CDCl<sub>3</sub>)

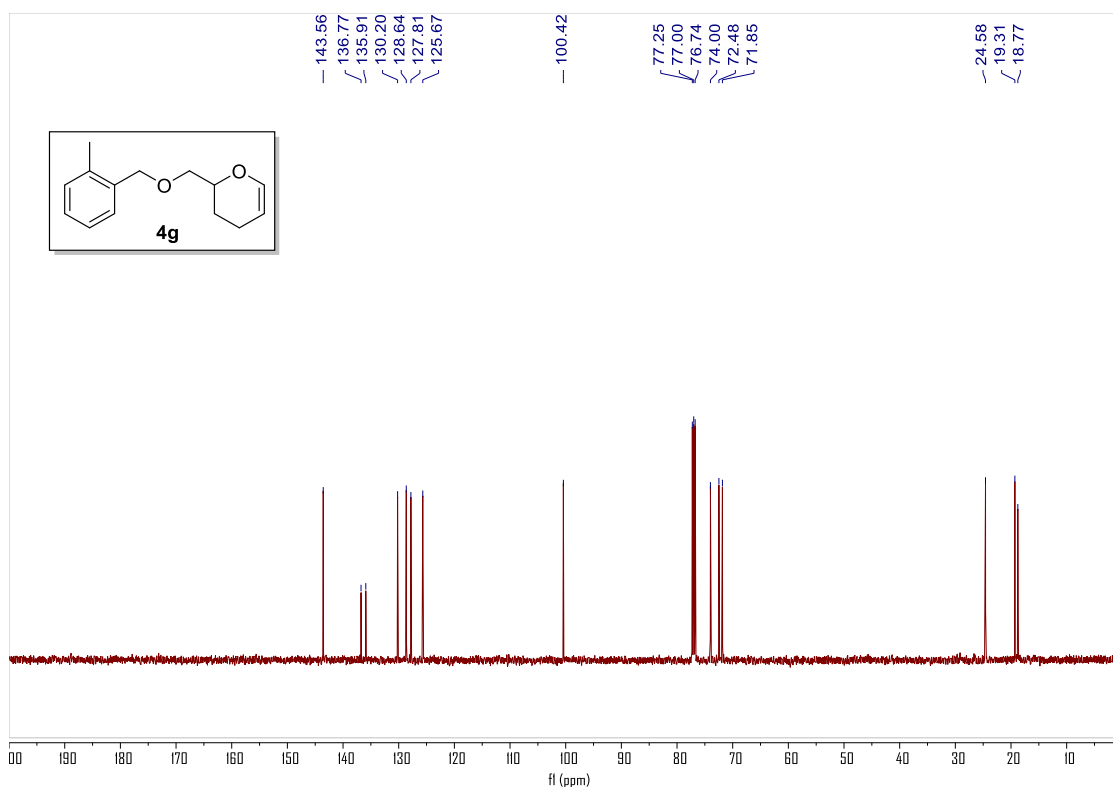

2-(((3-methylbenzyl)oxy)methyl)-3,4-dihydro-2H-pyran (**4h**)

<sup>1</sup>H spectrum (500 MHz, CDCl<sub>3</sub>)

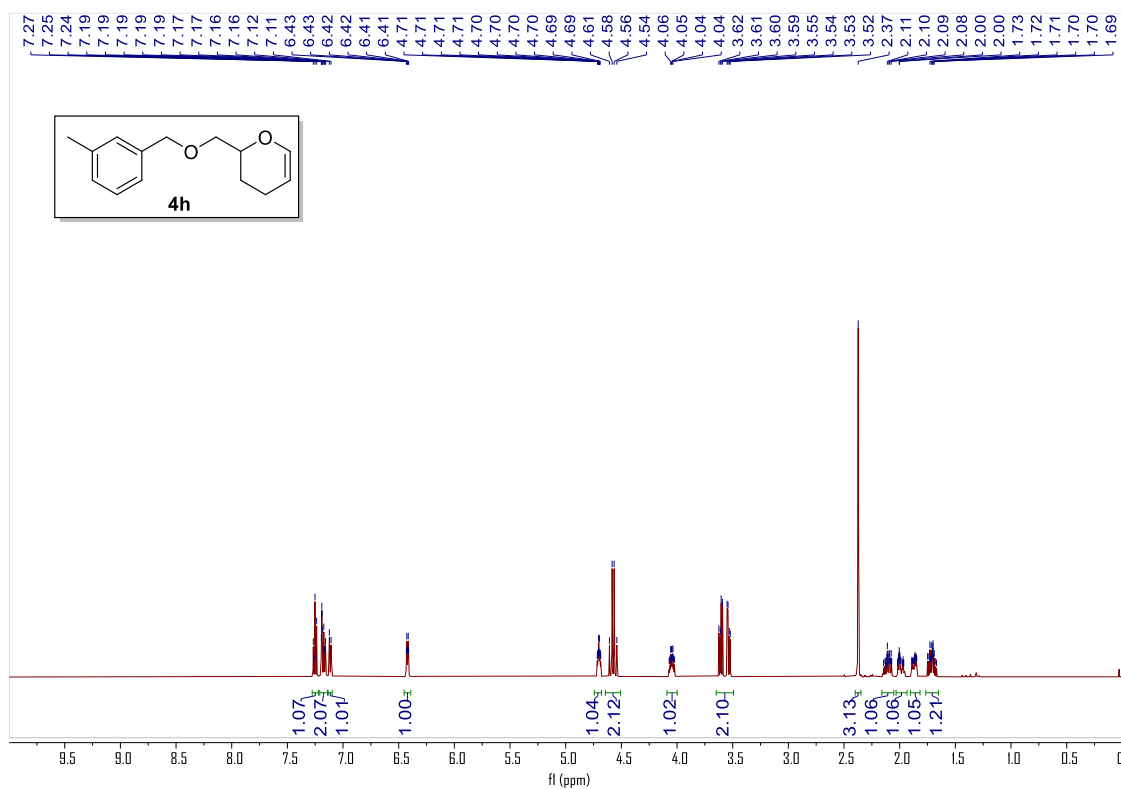

<sup>13</sup>C spectrum (126 MHz, CDCl<sub>3</sub>)

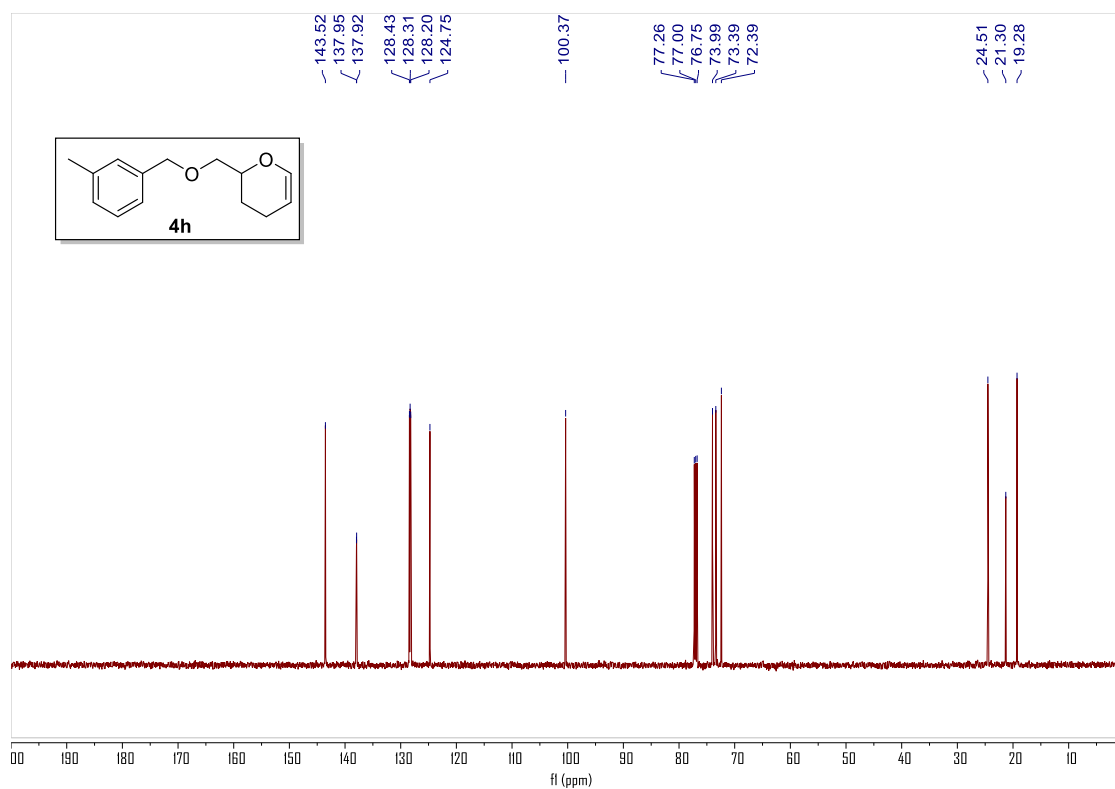

2-(((3,5-dimethylbenzyl)oxy)methyl)-3,4-dihydro-2H-pyran (**4i**)

<sup>1</sup>H spectrum (500 MHz, CDCl<sub>3</sub>)

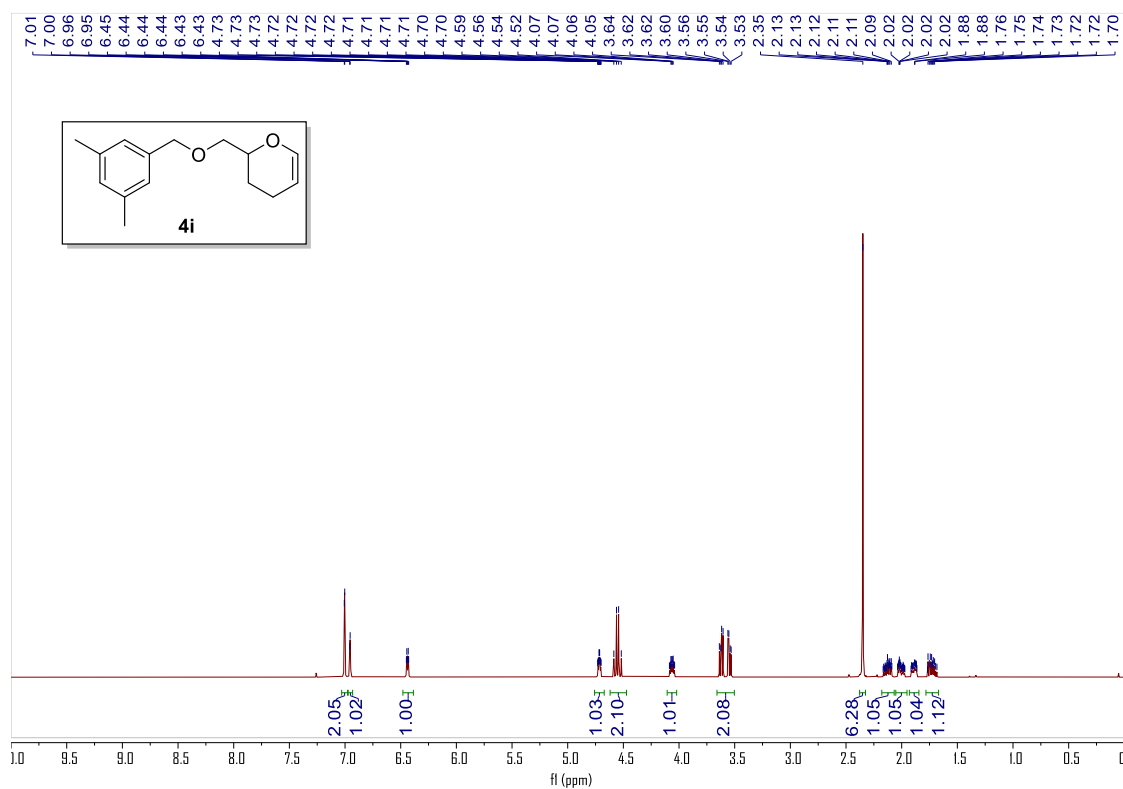



$^{13}\text{C}$  spectrum (126 MHz,  $\text{CDCl}_3$ )

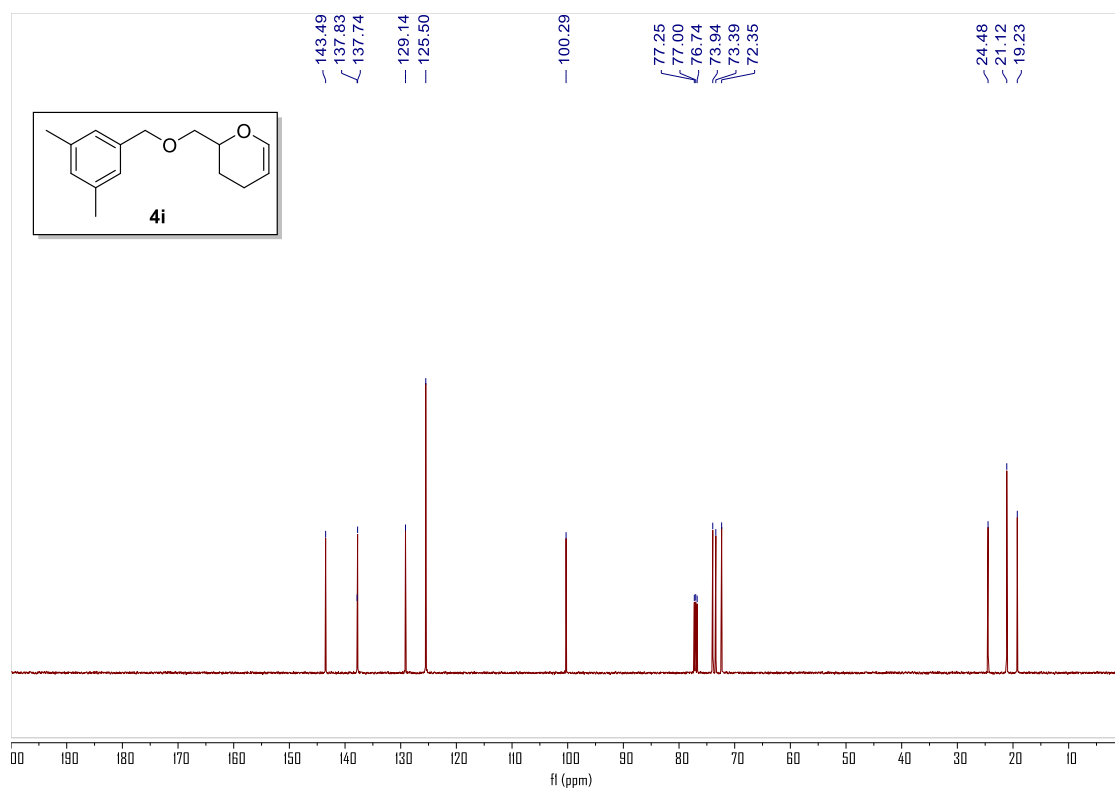

tert-butyl((3,4-dihydro-2H-pyran-2-yl)methoxy)diphenylsilane (**4j**)

$^1\text{H}$  spectrum (500 MHz,  $\text{CDCl}_3$ )

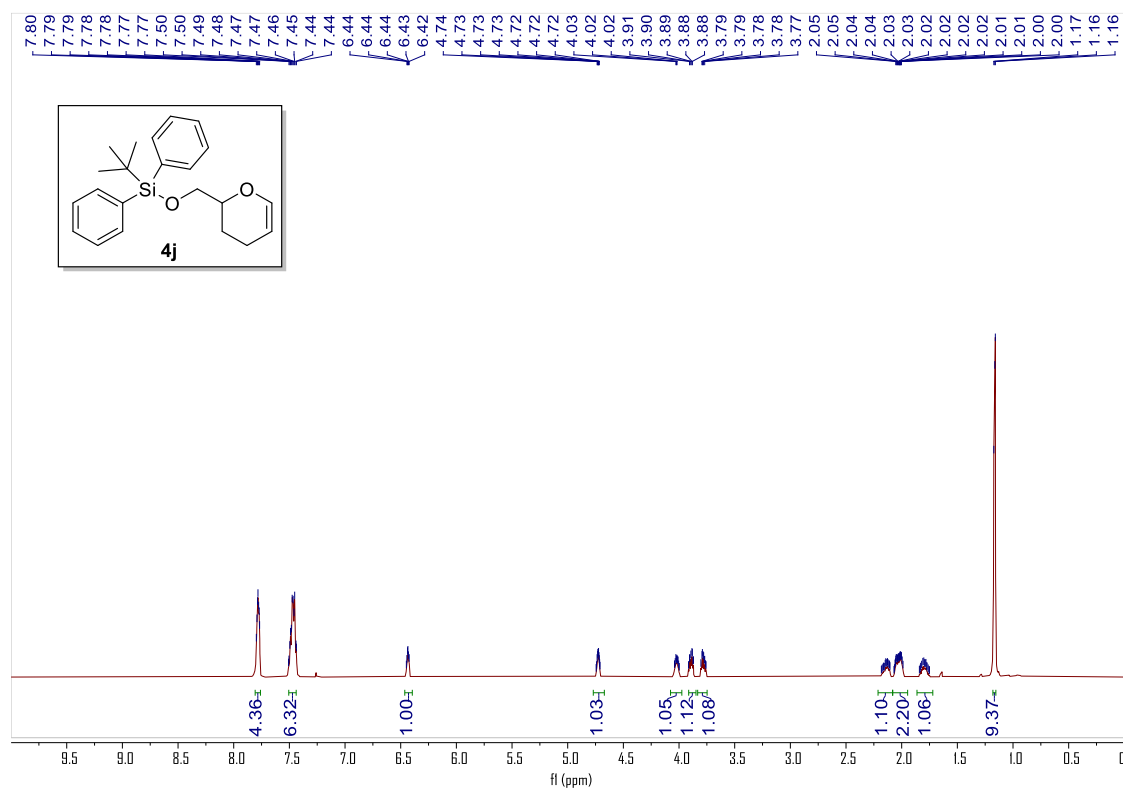



### (3,4-dihydro-2H-pyran-2-yl)methyl 3-(furan-2-yl)propanoate (4m)

$^1\text{H}$  spectrum (500 MHz,  $\text{CDCl}_3$ )

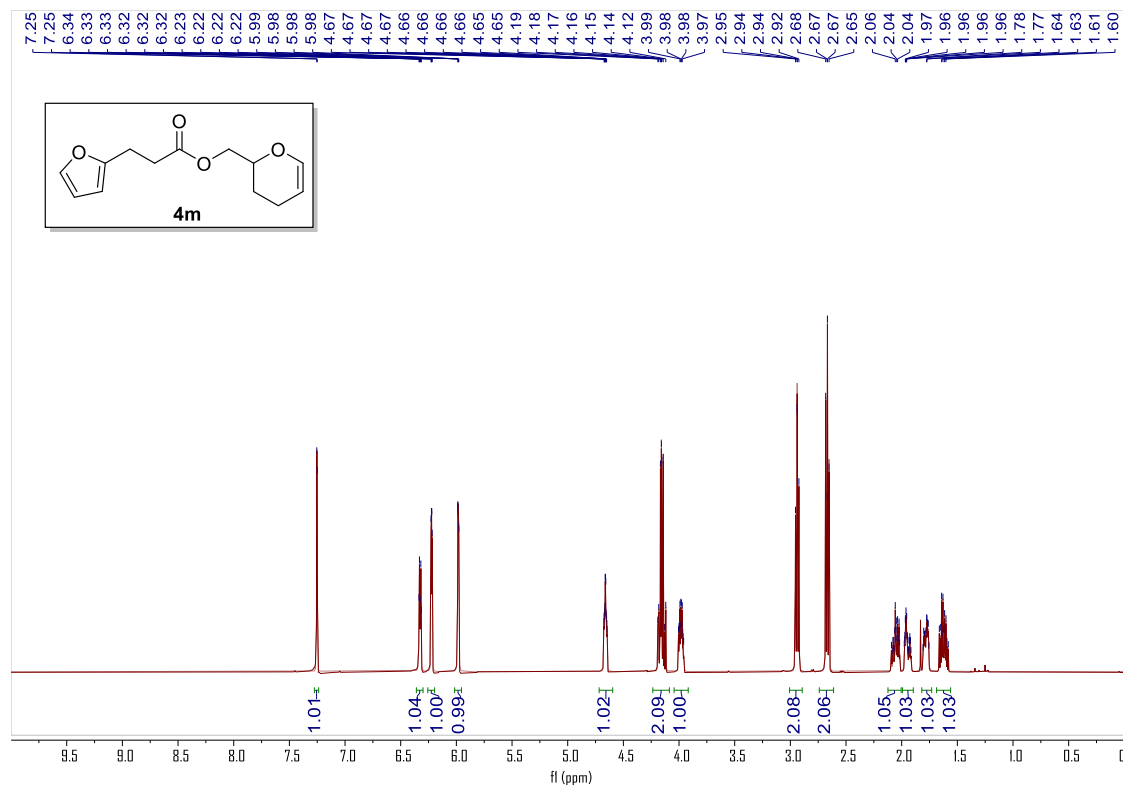

$^{13}\text{C}$  spectrum (126 MHz,  $\text{CDCl}_3$ )

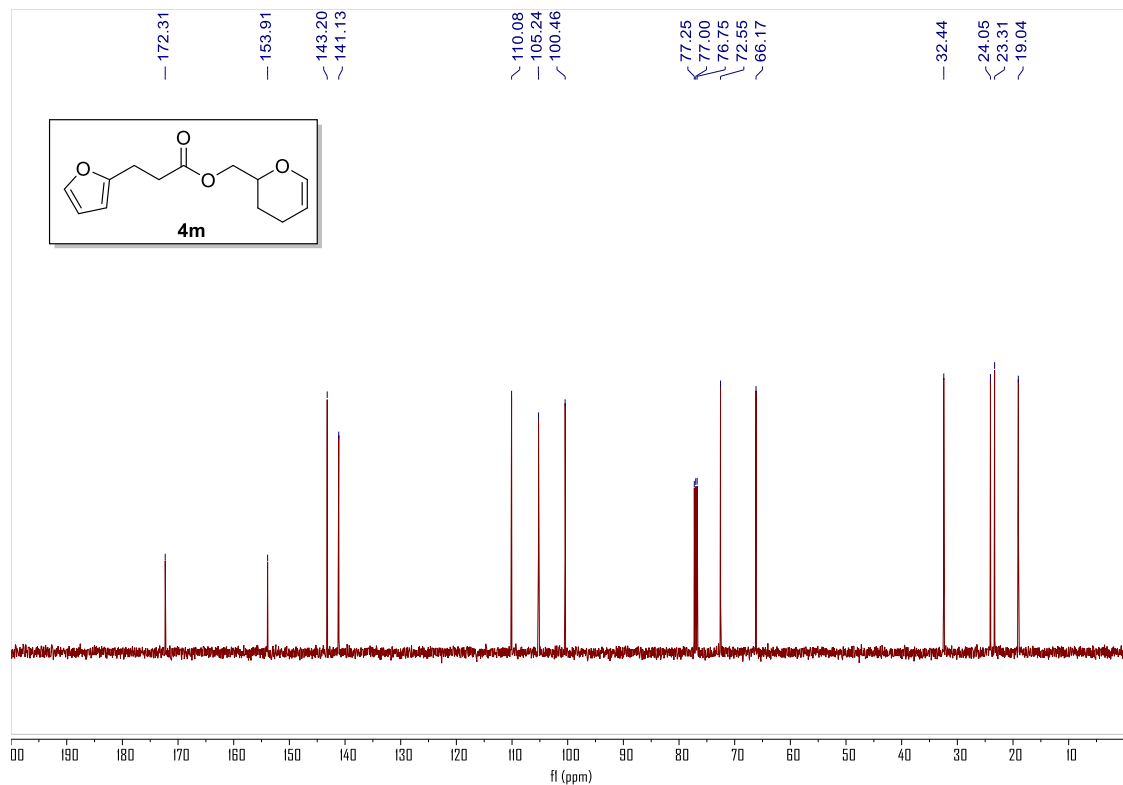

### (3,4-dihydro-2H-pyran-2-yl)methyl 6-bromo-2-naphthoate (4n)

$^1\text{H}$  spectrum (500 MHz,  $\text{CDCl}_3$ )

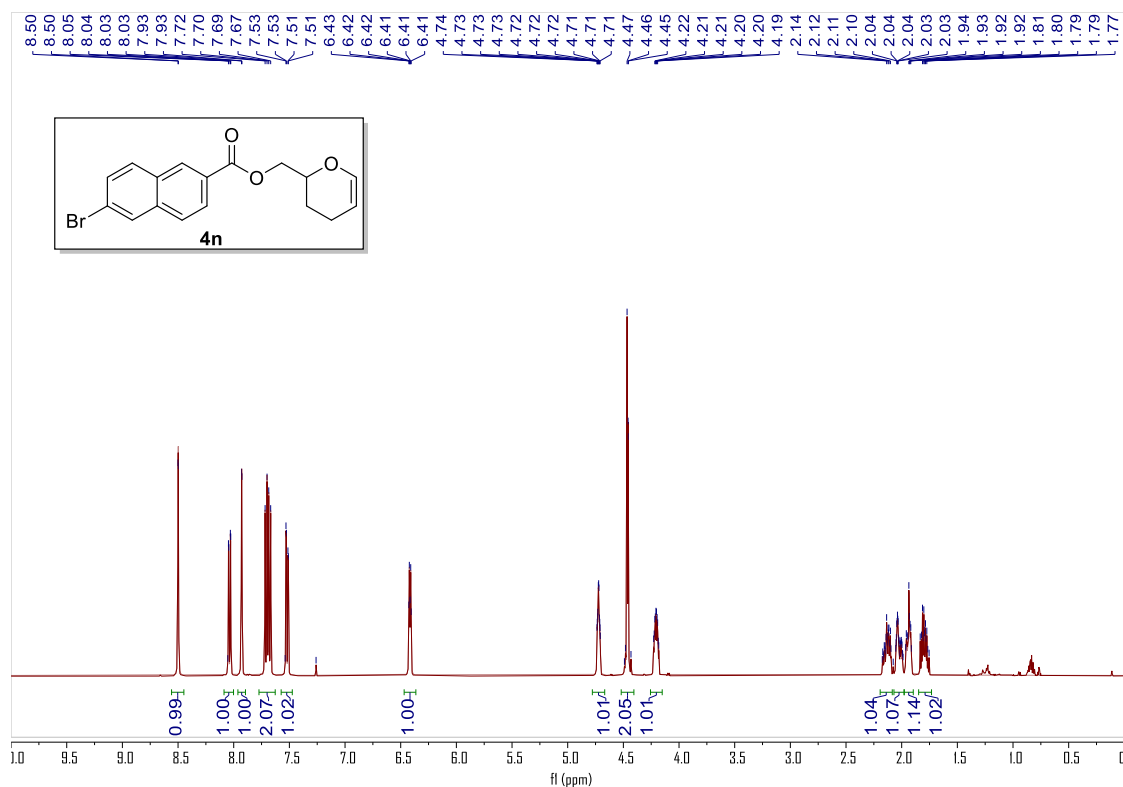

$^{13}\text{C}$  spectrum (126 MHz,  $\text{CDCl}_3$ )

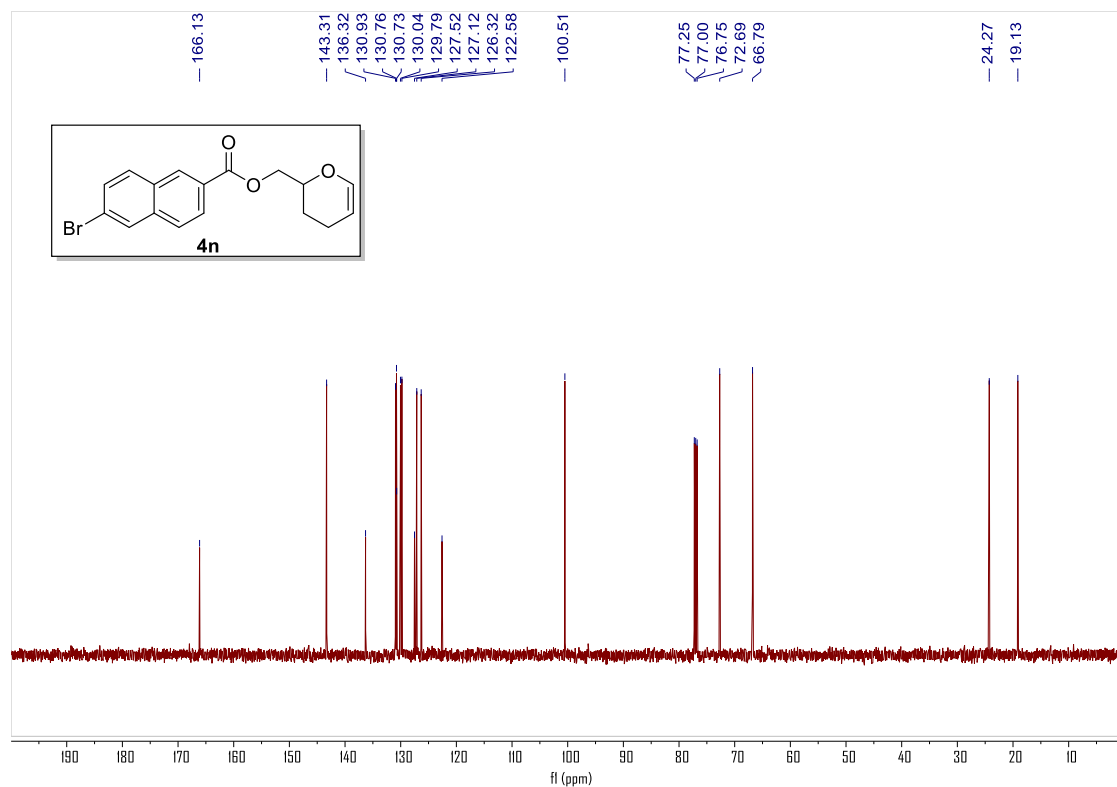

### (3,4-dihydro-2H-pyran-2-yl)methyl cyclobutanecarboxylate (4o)

<sup>1</sup>H spectrum (500 MHz, CDCl<sub>3</sub>)

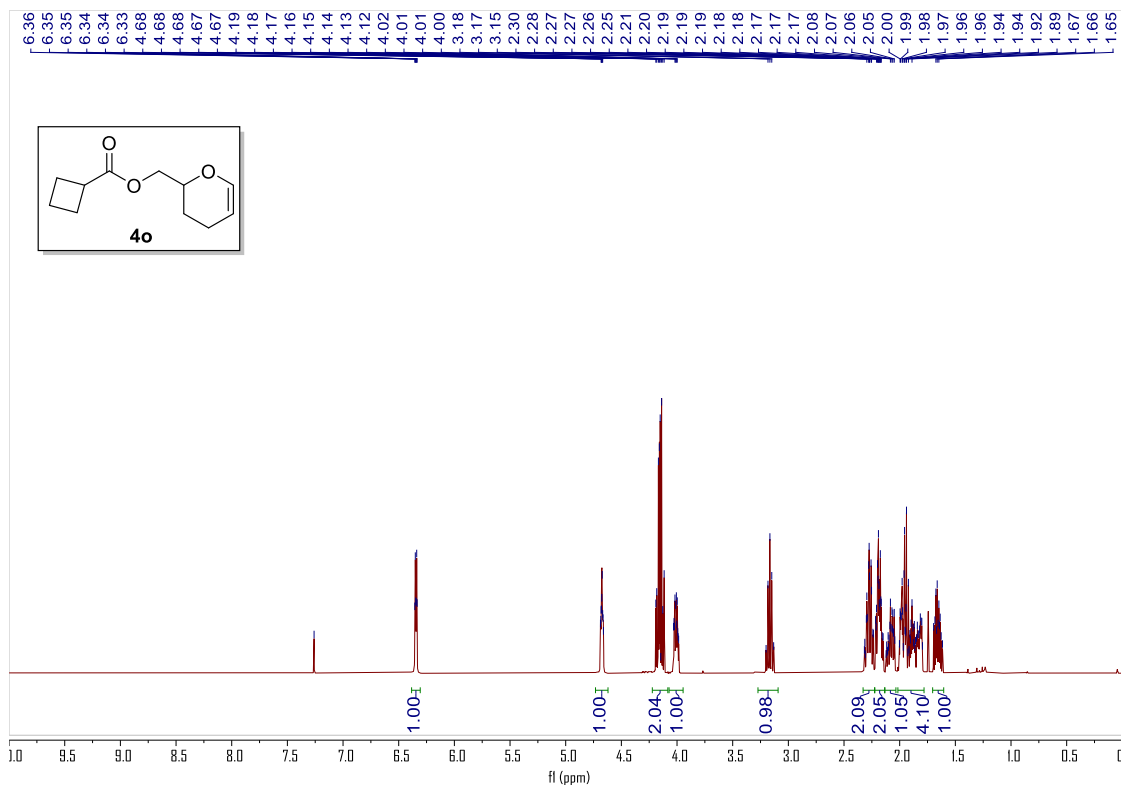

<sup>13</sup>C spectrum (126 MHz, CDCl<sub>3</sub>)

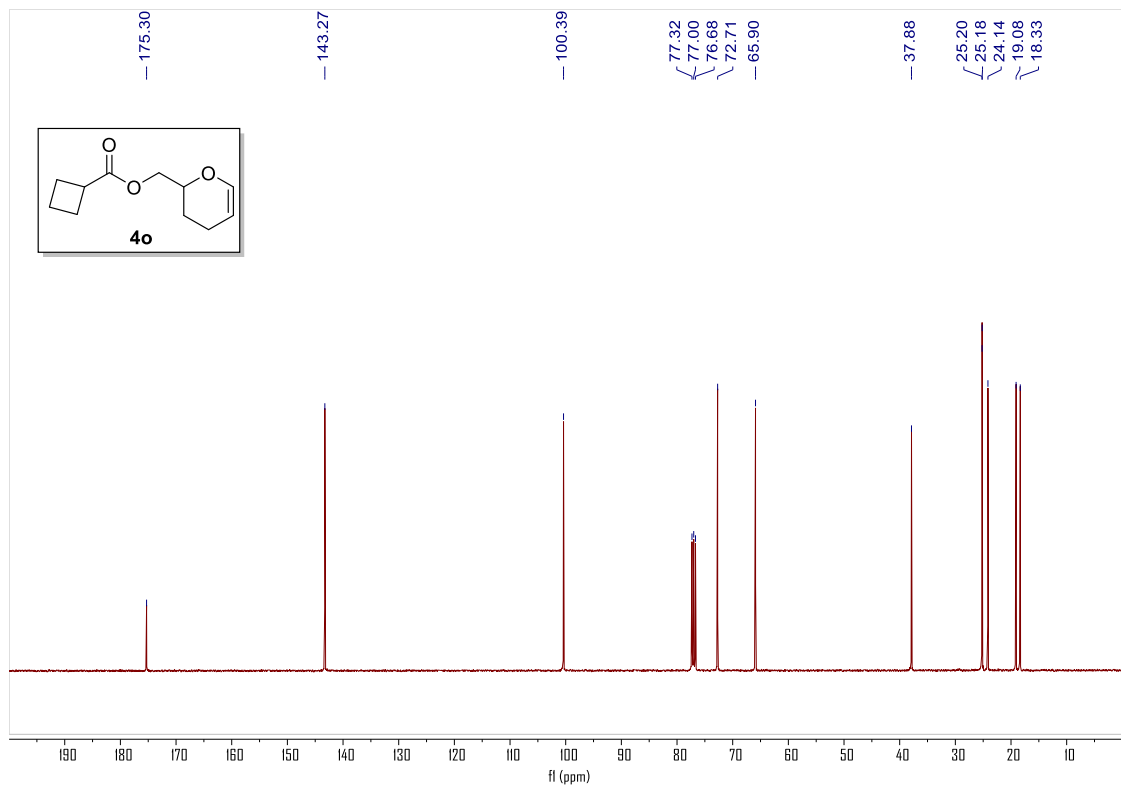

**(8R,9S,13S,14S)-3-((3,4-dihydro-2H-pyran-2-yl)methoxy)-13-methyl-6,7,8,9,11,12,13,14,15,16-decahydro-17H-cyclopenta[a]phenanthren-17-one (4q)**

$^1\text{H}$  spectrum (500 MHz,  $\text{CDCl}_3$ )

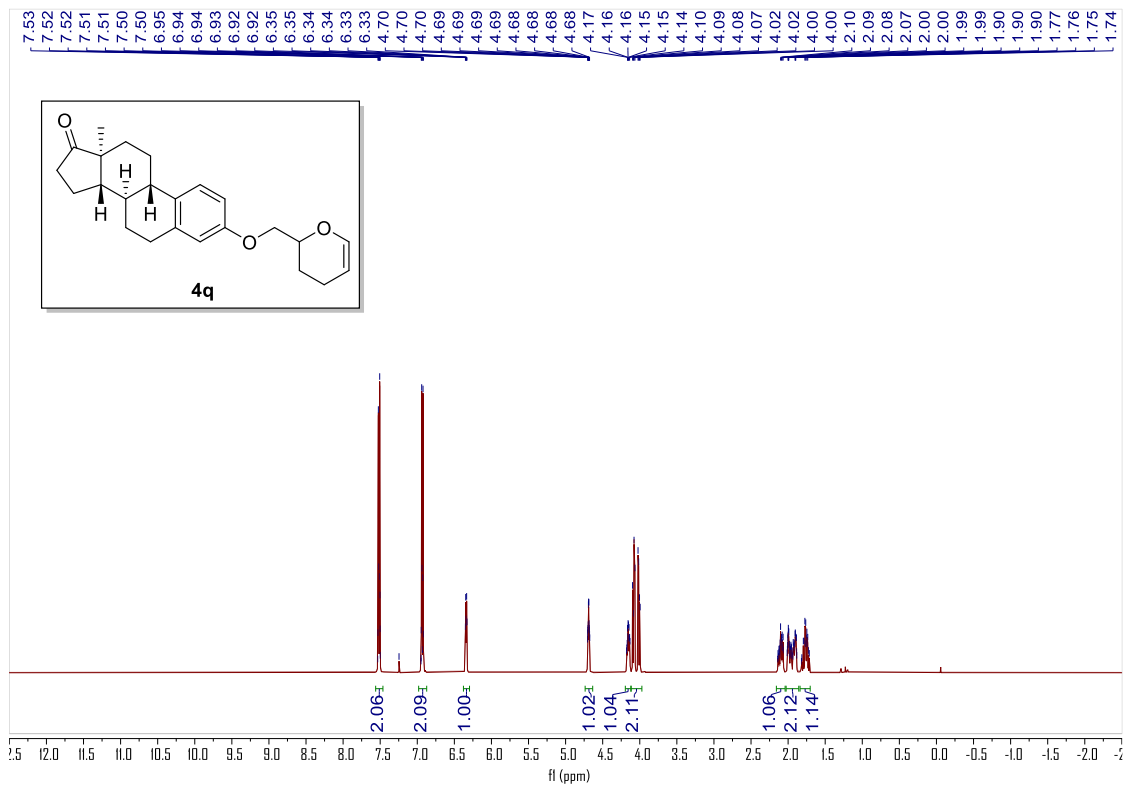

$^{13}\text{C}$  spectrum (126 MHz,  $\text{CDCl}_3$ )

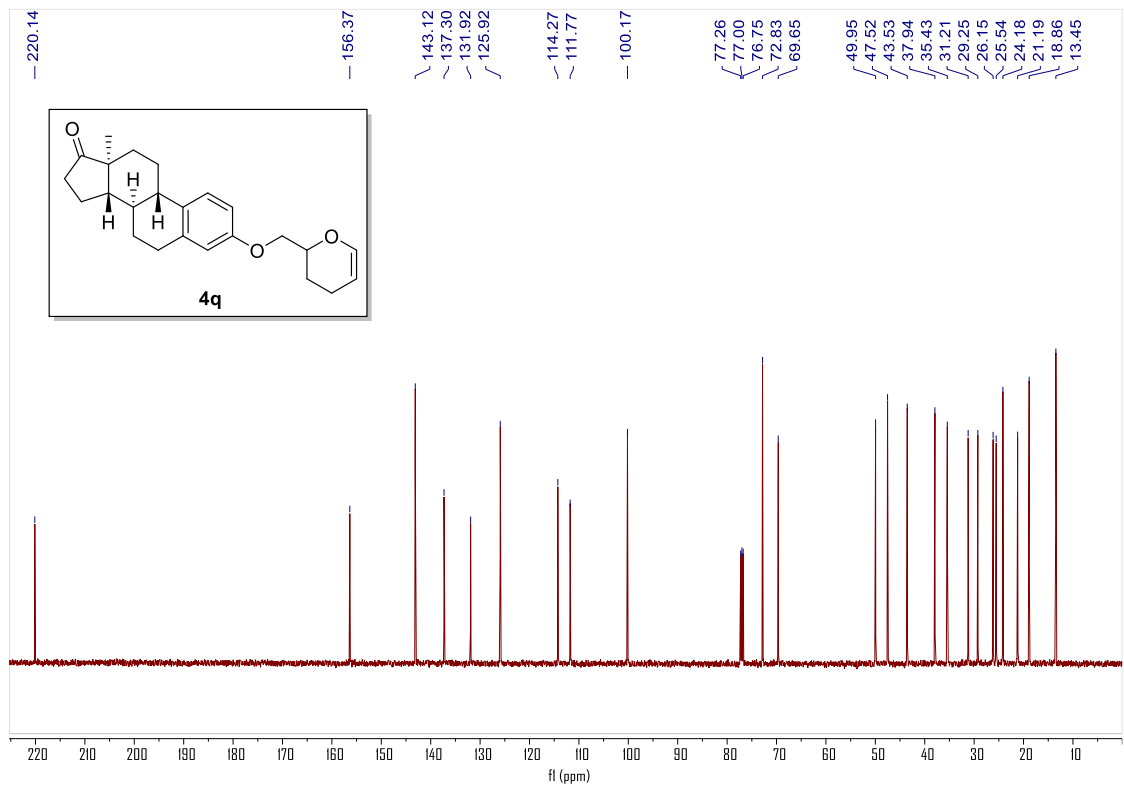

# (3,4-dihydro-2H-pyran-2-yl)methyl 2-(4-isobutylphenyl)propanoate (4r)

$^1\text{H}$  spectrum (500 MHz,  $\text{CDCl}_3$ )

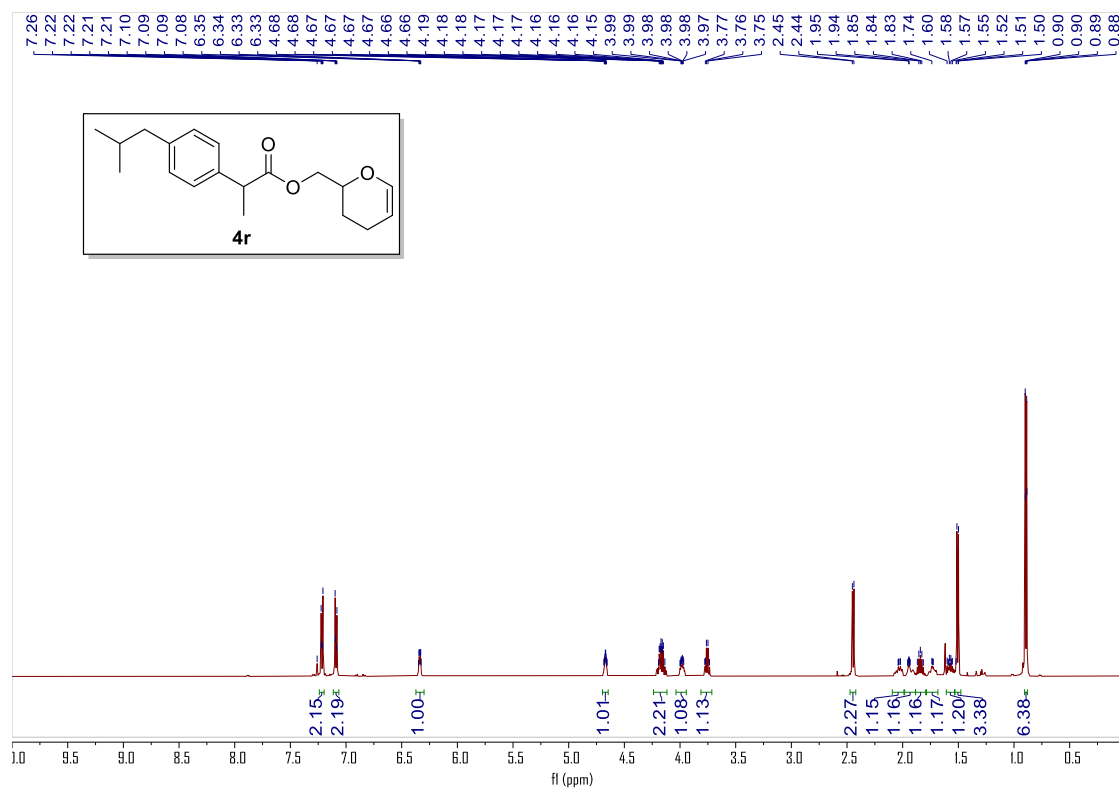

**(3,4-dihydro-2H-pyran-2-yl)methyl 2-(11-oxo-6,11-dihydrodibenzo[b,e]oxepin-3-yl)acetate (4s)**

<sup>1</sup>H spectrum (400 MHz, CDCl<sub>3</sub>)

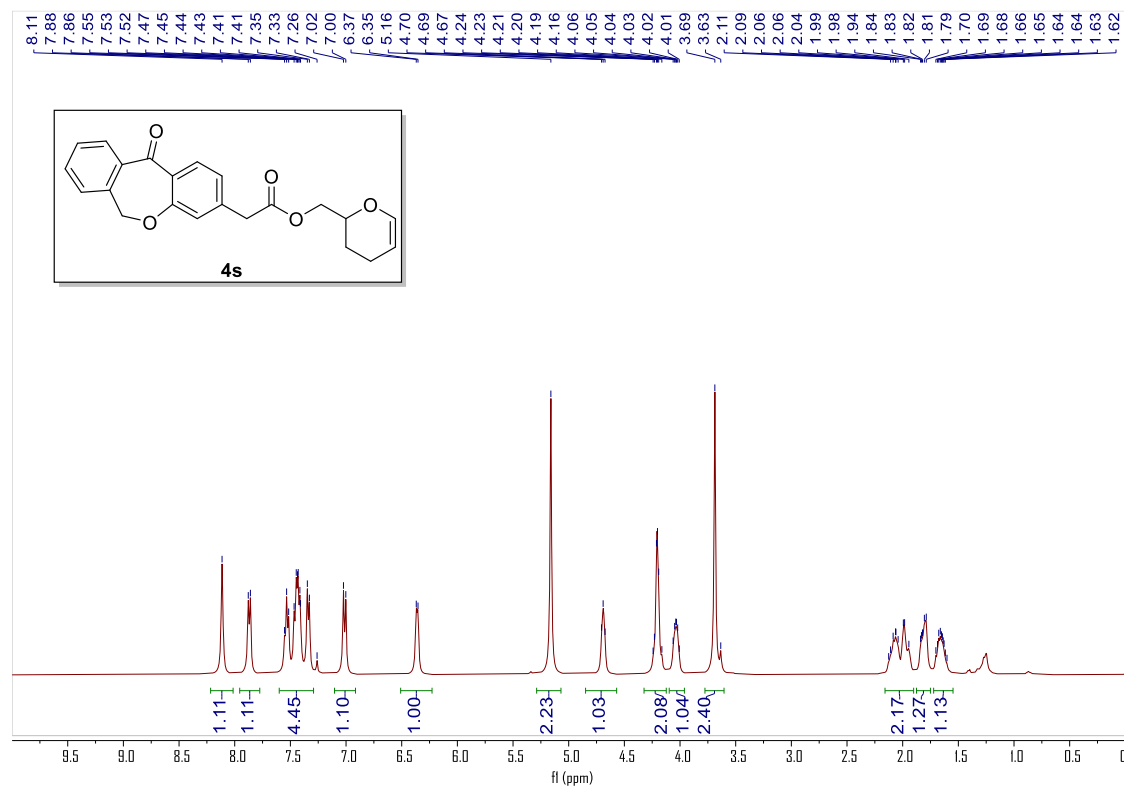

<sup>13</sup>C spectrum (101 MHz, CDCl<sub>3</sub>)

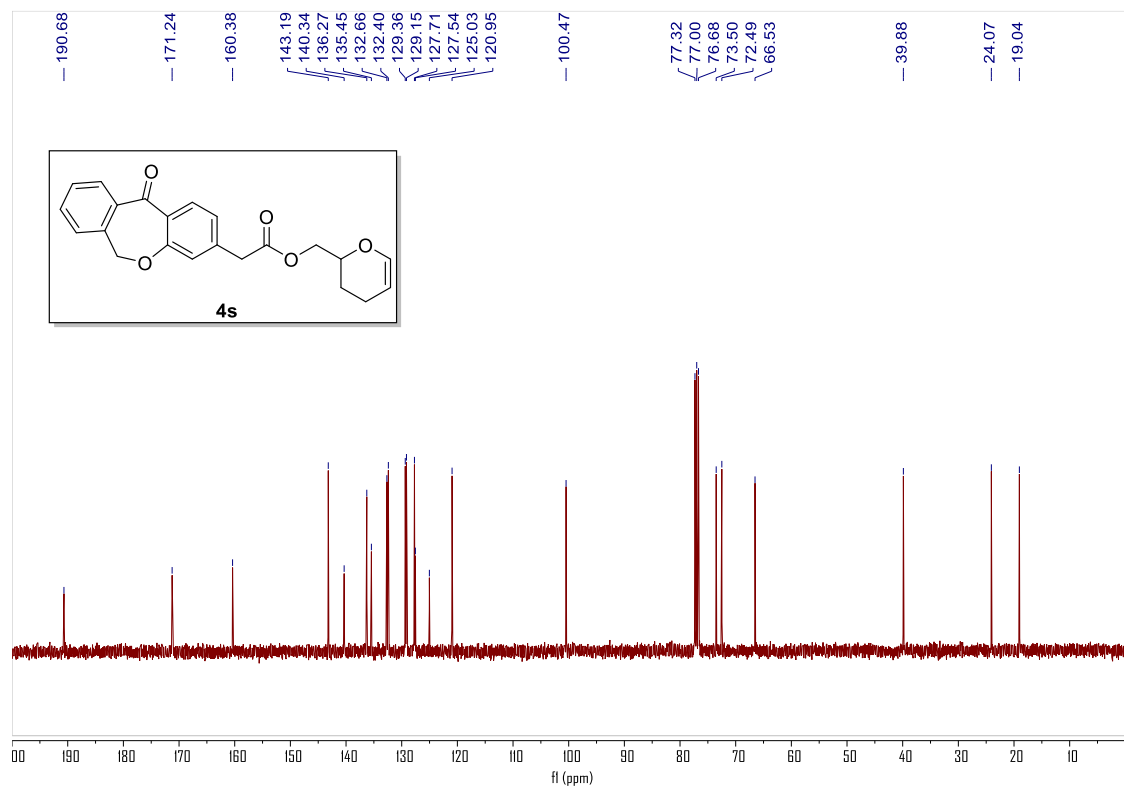



### (E)-2-styryltetrahydro-2H-pyran (3a)

$^1\text{H}$  spectrum (500 MHz,  $\text{CDCl}_3$ )

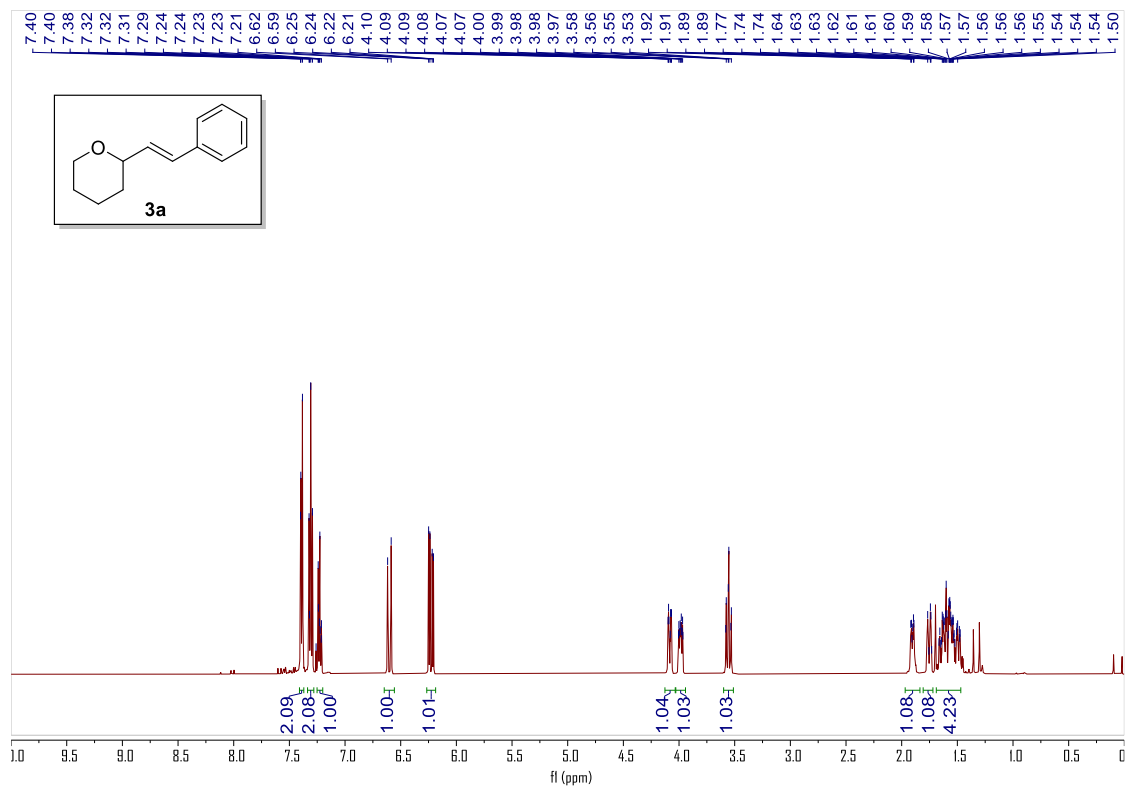

$^{13}\text{C}$  spectrum (126 MHz,  $\text{CDCl}_3$ )

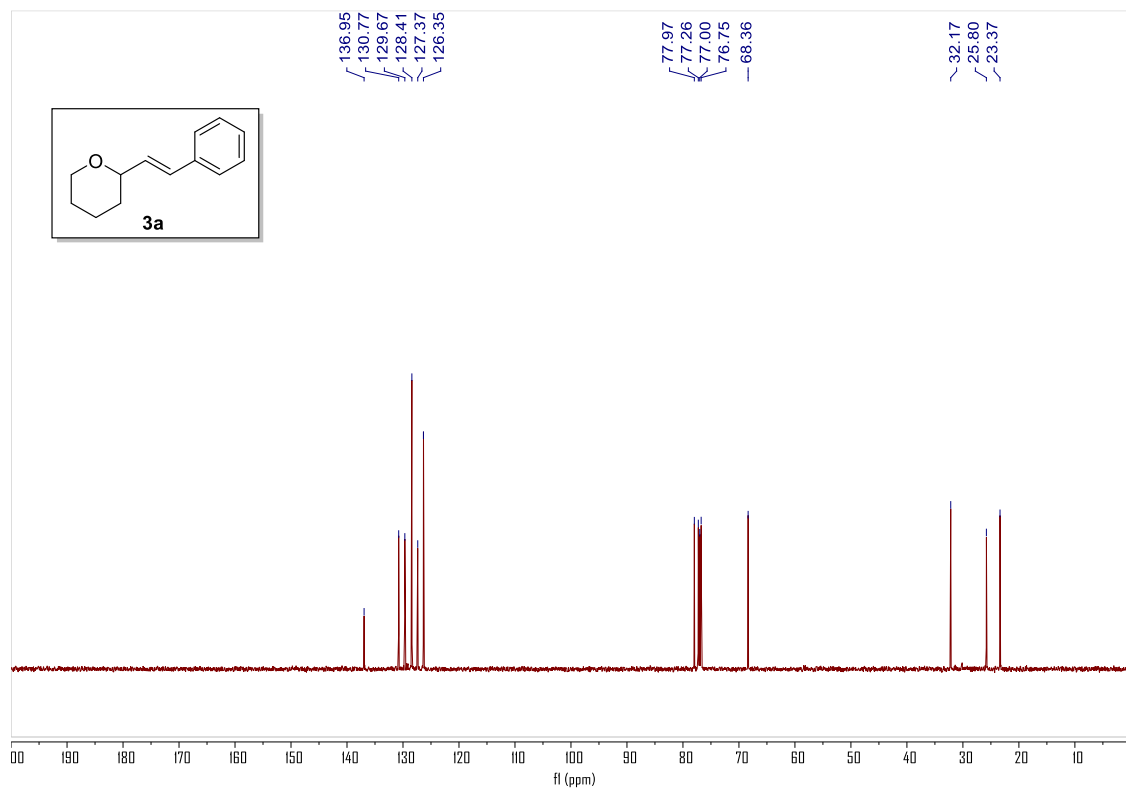

### (E)-2-(4-methylstyryl)tetrahydro-2H-pyran (**3b**)

$^1\text{H}$  spectrum (500MHz,  $\text{CDCl}_3$ )

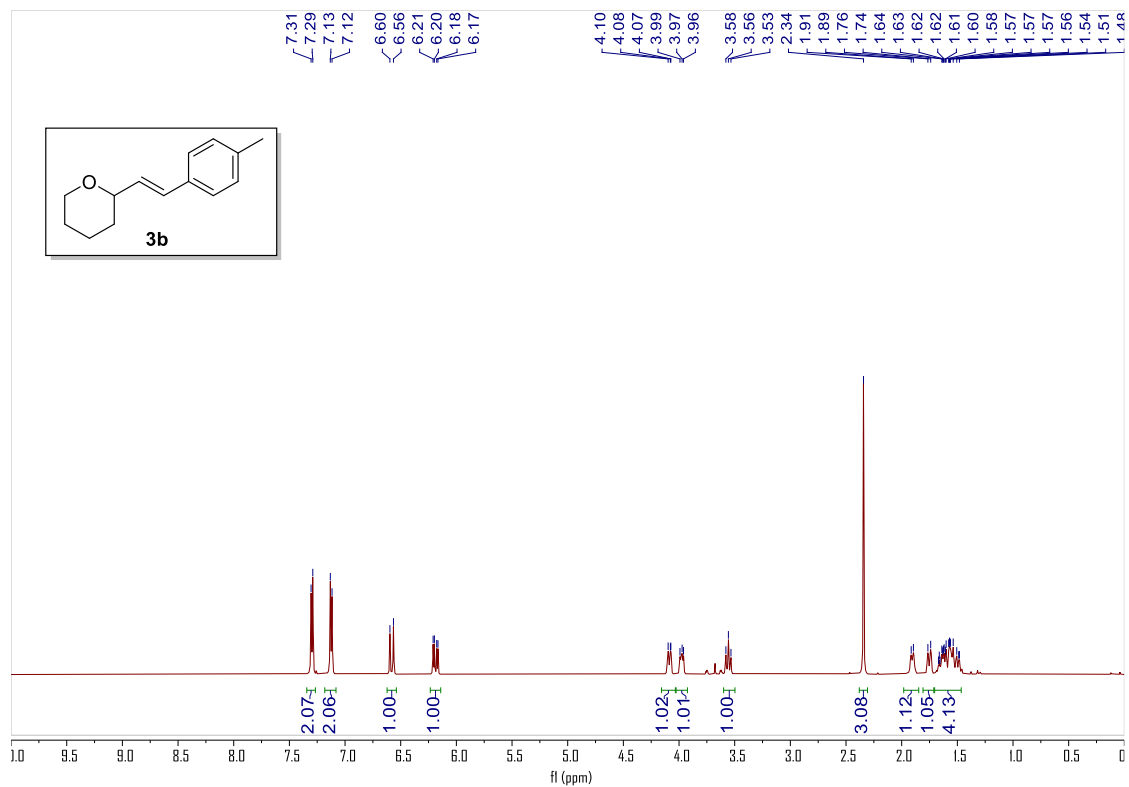

$^{13}\text{C}$  spectrum (126 MHz,  $\text{CDCl}_3$ )

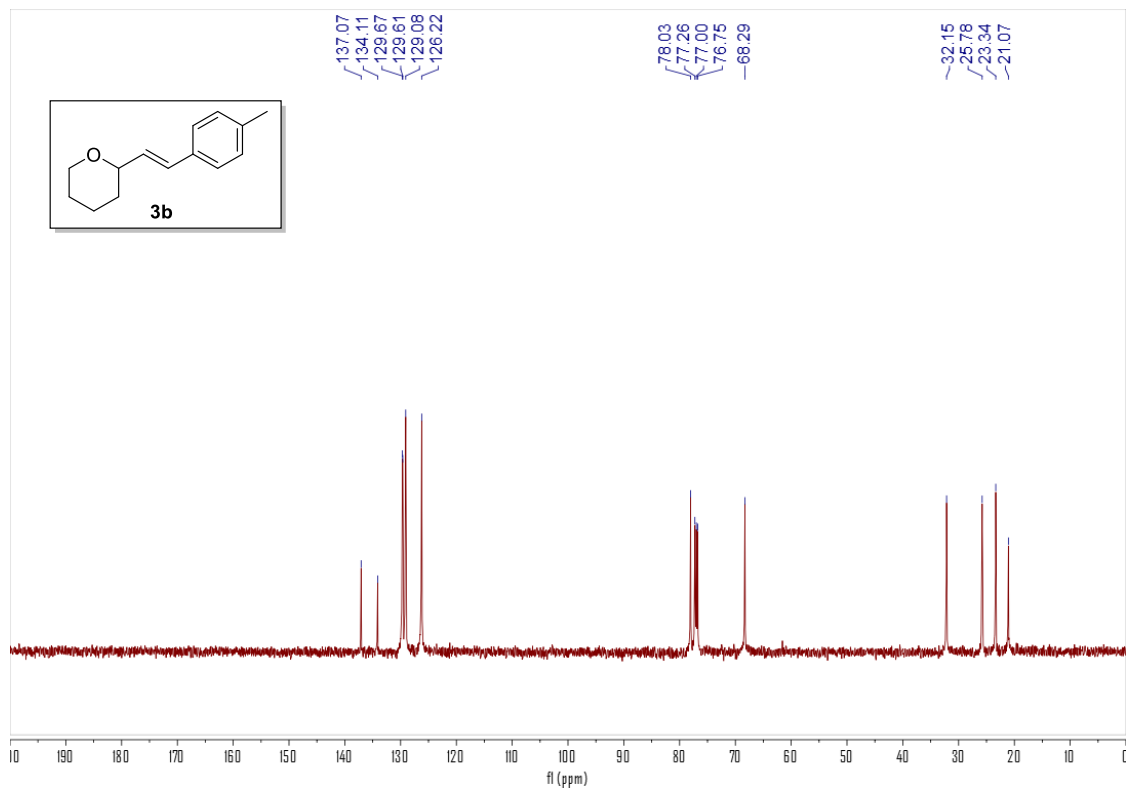

### (E)-2-(4-(tert-butyl)styryl)tetrahydro-2H-pyran (**3c**)

<sup>1</sup>H spectrum (500 MHz, CDCl<sub>3</sub>)

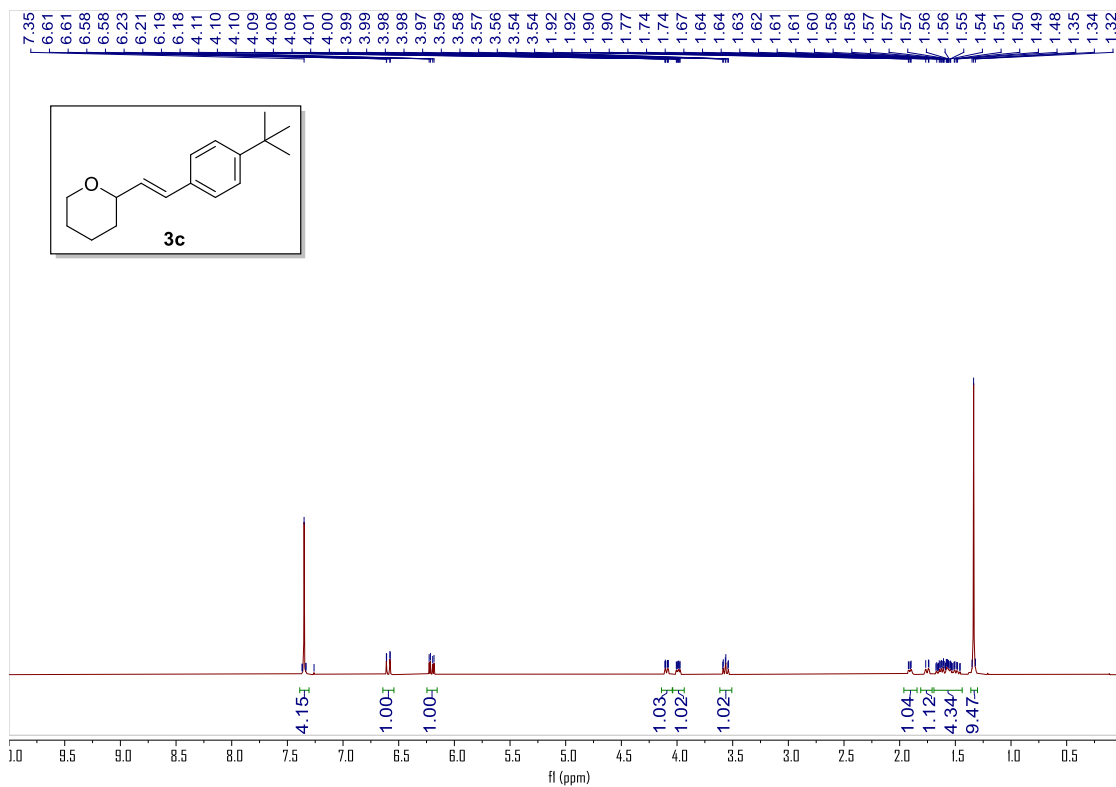

<sup>13</sup>C spectrum (126 MHz, CDCl<sub>3</sub>)

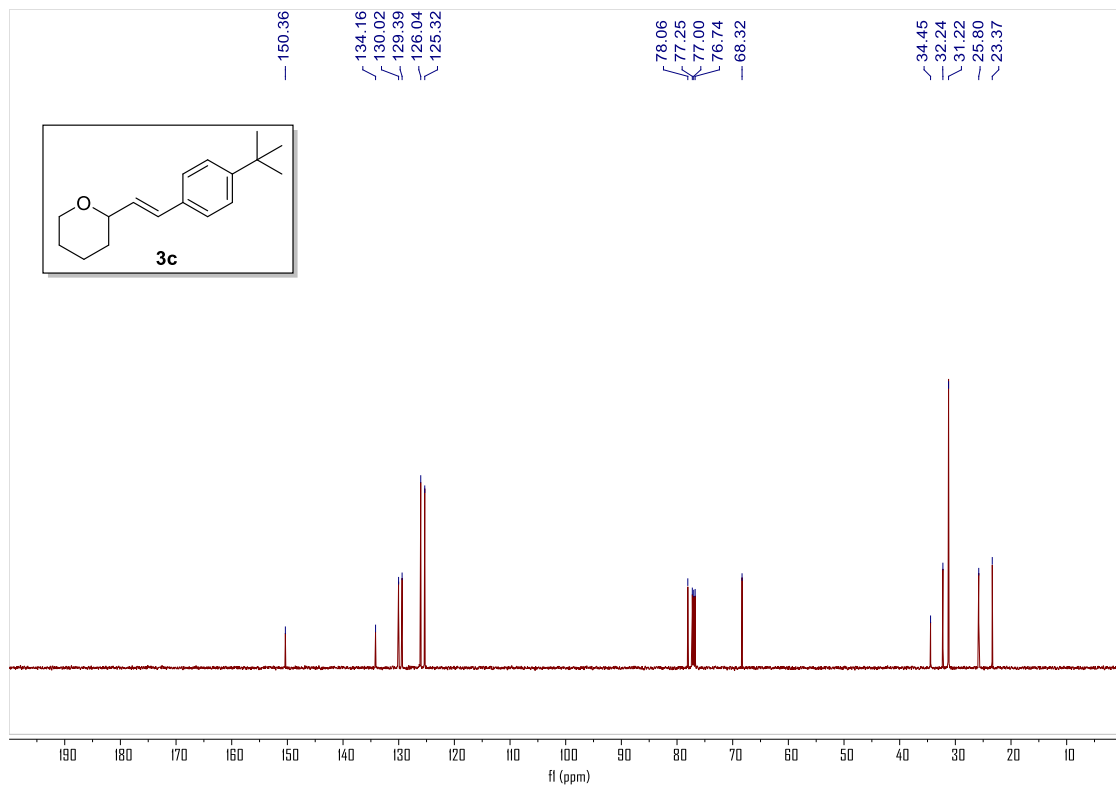

### (E)-2-(4-methoxystyryl)tetrahydro-2H-pyran (3d)

<sup>1</sup>H spectrum (500 MHz, CDCl<sub>3</sub>)

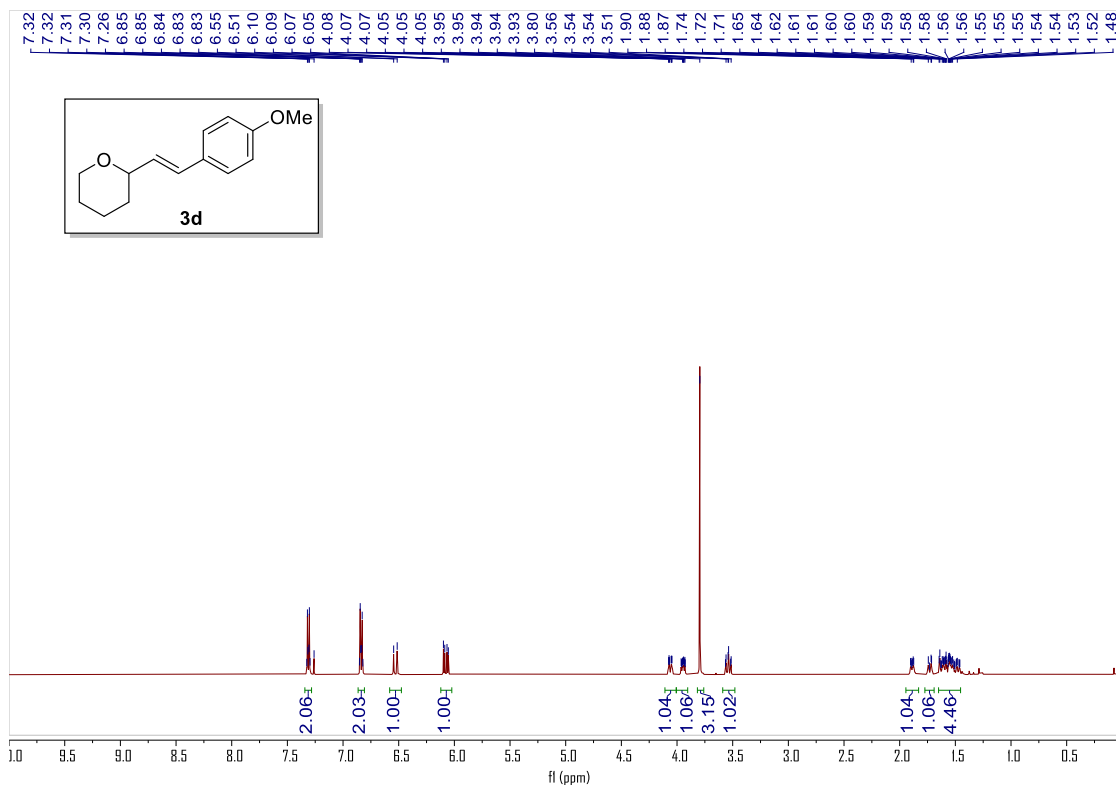

<sup>13</sup>C spectrum (126 MHz, CDCl<sub>3</sub>)

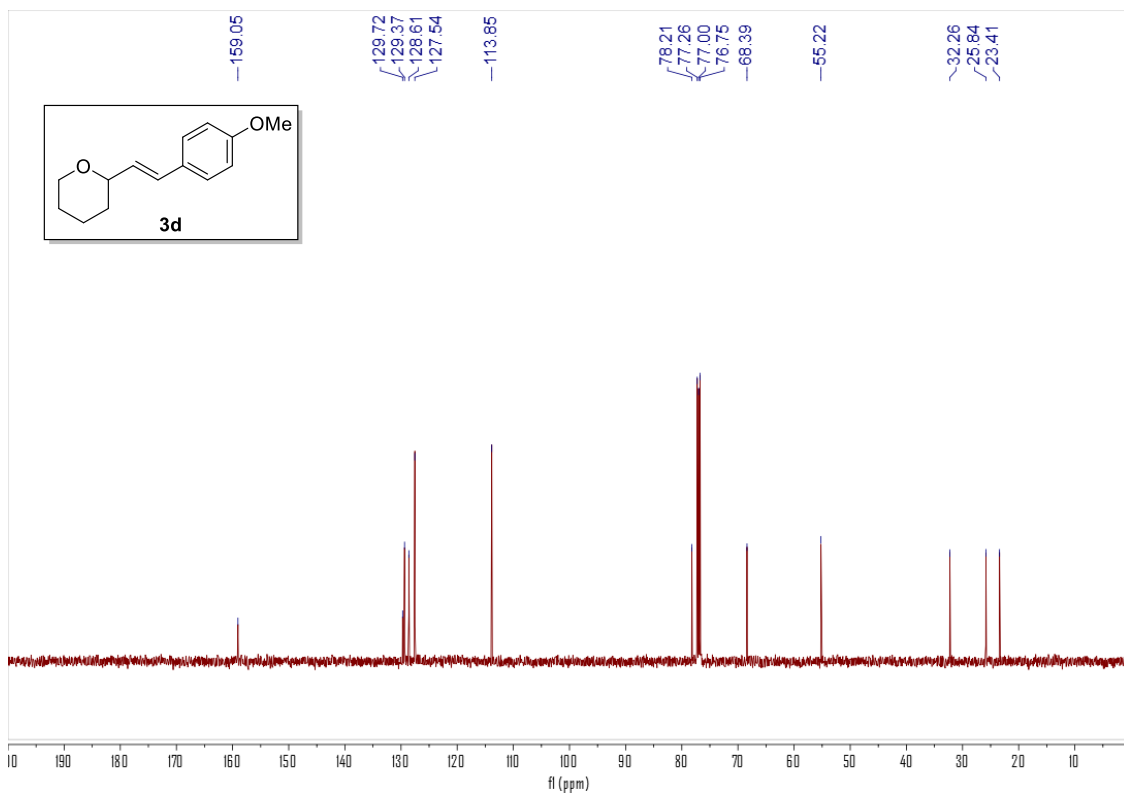

**(E)-2-(2-([1,1'-biphenyl]-4-yl)vinyl)tetrahydro-2H-pyran (3e)**

<sup>1</sup>H spectrum (500 MHz, CDCl<sub>3</sub>)

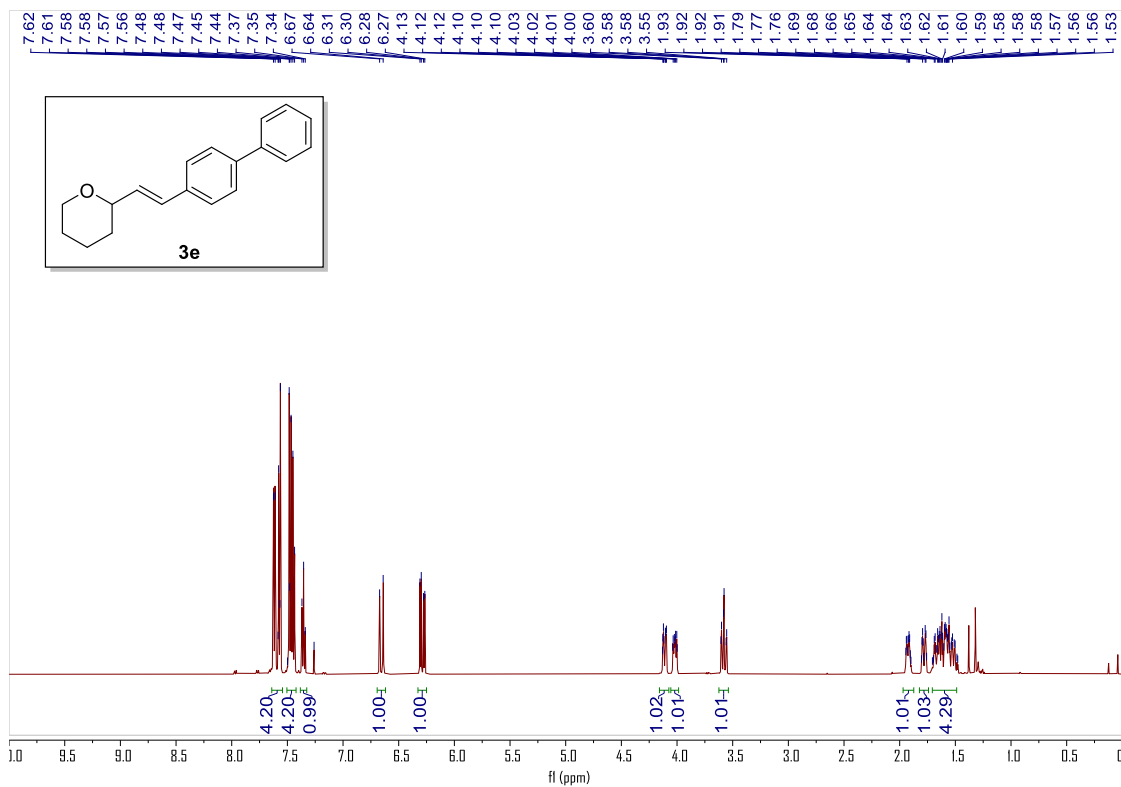

<sup>13</sup>C spectrum (126 MHz, CDCl<sub>3</sub>)

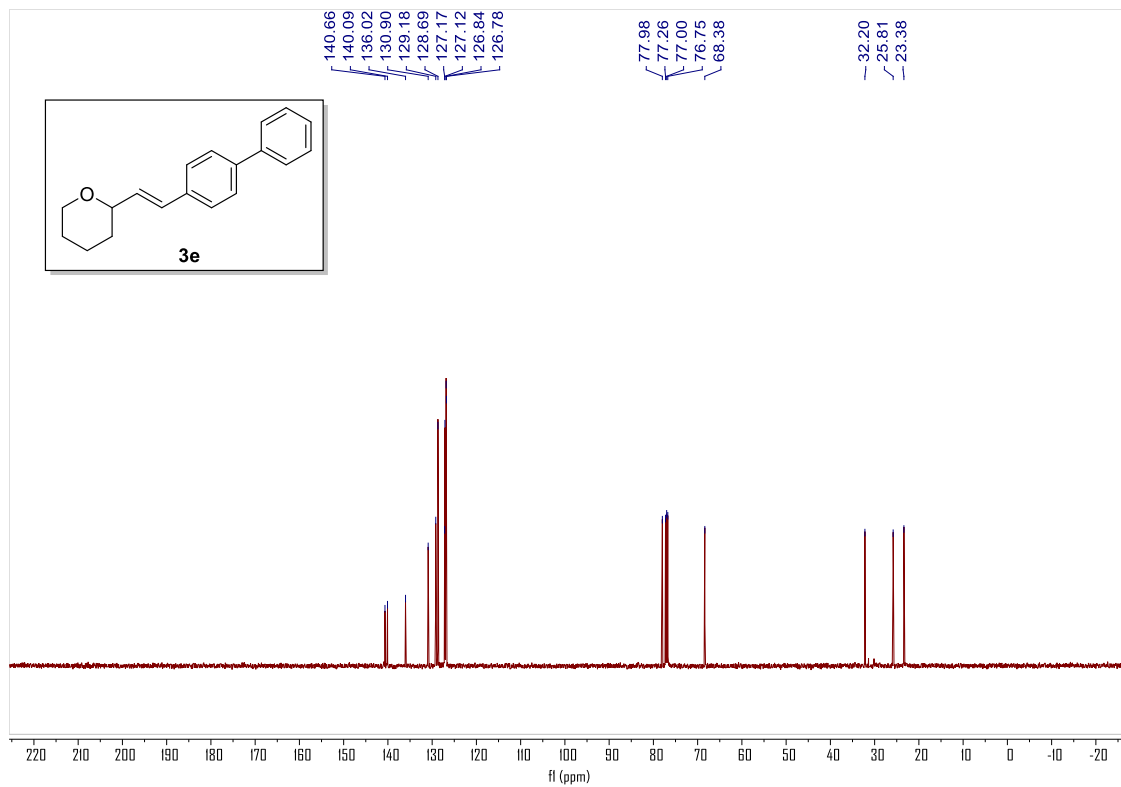

### (E)-2-(4-(trifluoromethoxy)styryl)tetrahydro-2H-pyran (3f)

<sup>1</sup>H spectrum (500 MHz, CDCl<sub>3</sub>)

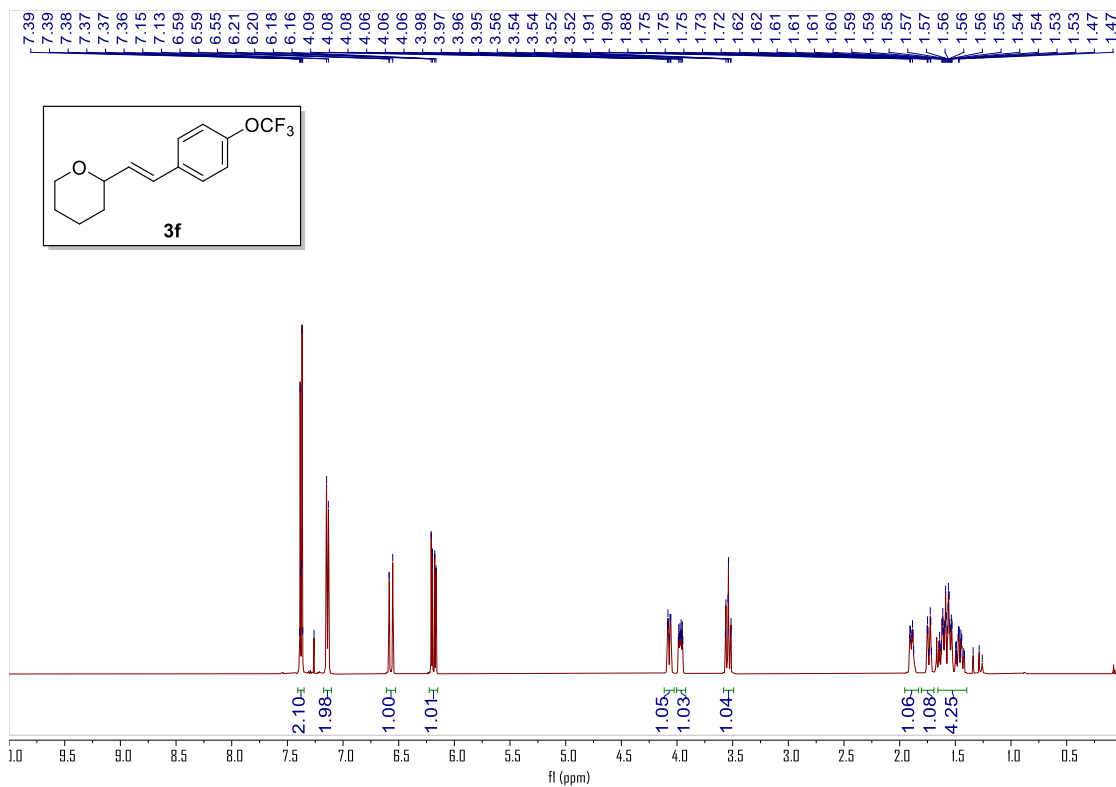

<sup>13</sup>C spectrum (126 MHz, CDCl<sub>3</sub>)

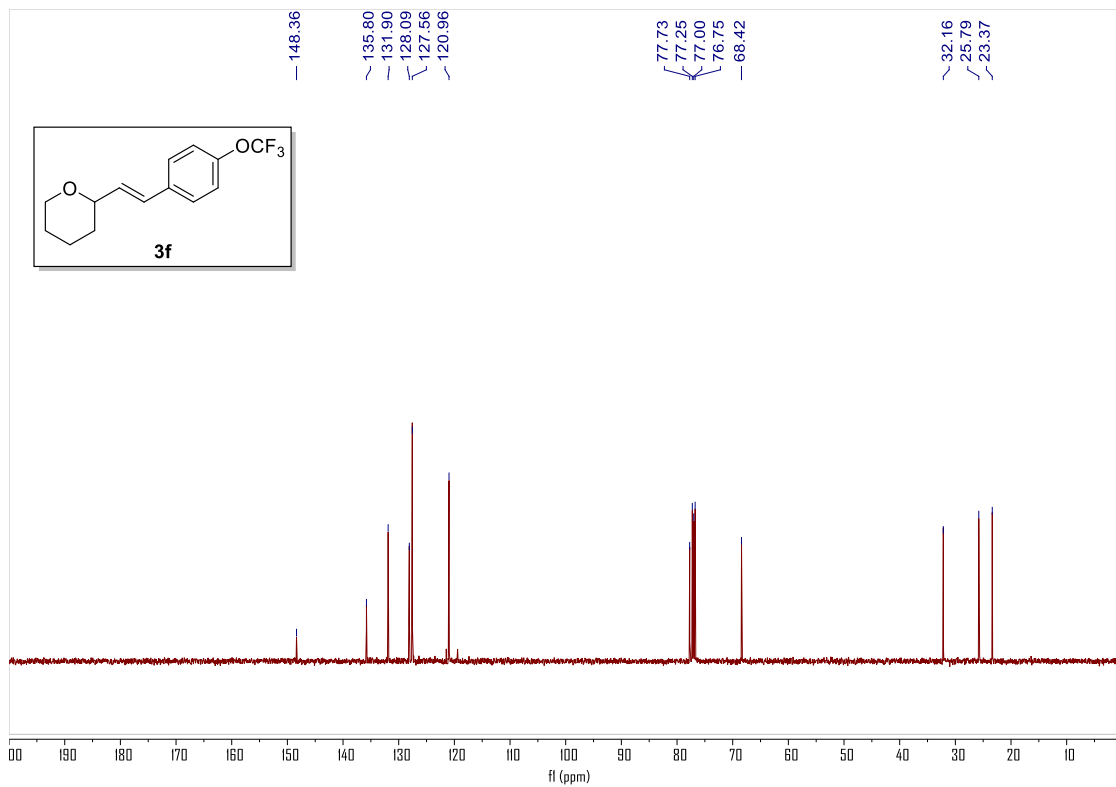

$^{19}\text{F}$  spectrum (471 MHz,  $\text{CDCl}_3$ )

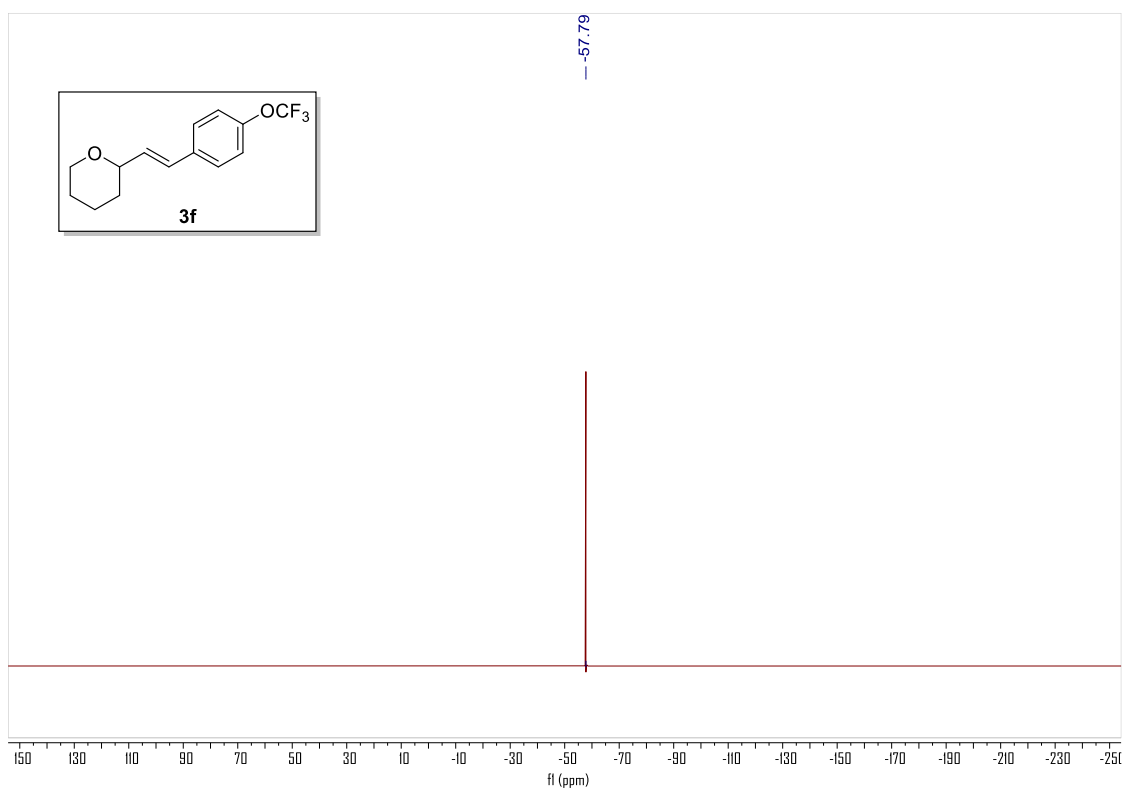

(E)-2-(4-fluorostyryl)tetrahydro-2H-pyran (**3g**)

$^1\text{H}$  spectrum (500 MHz,  $\text{CDCl}_3$ )

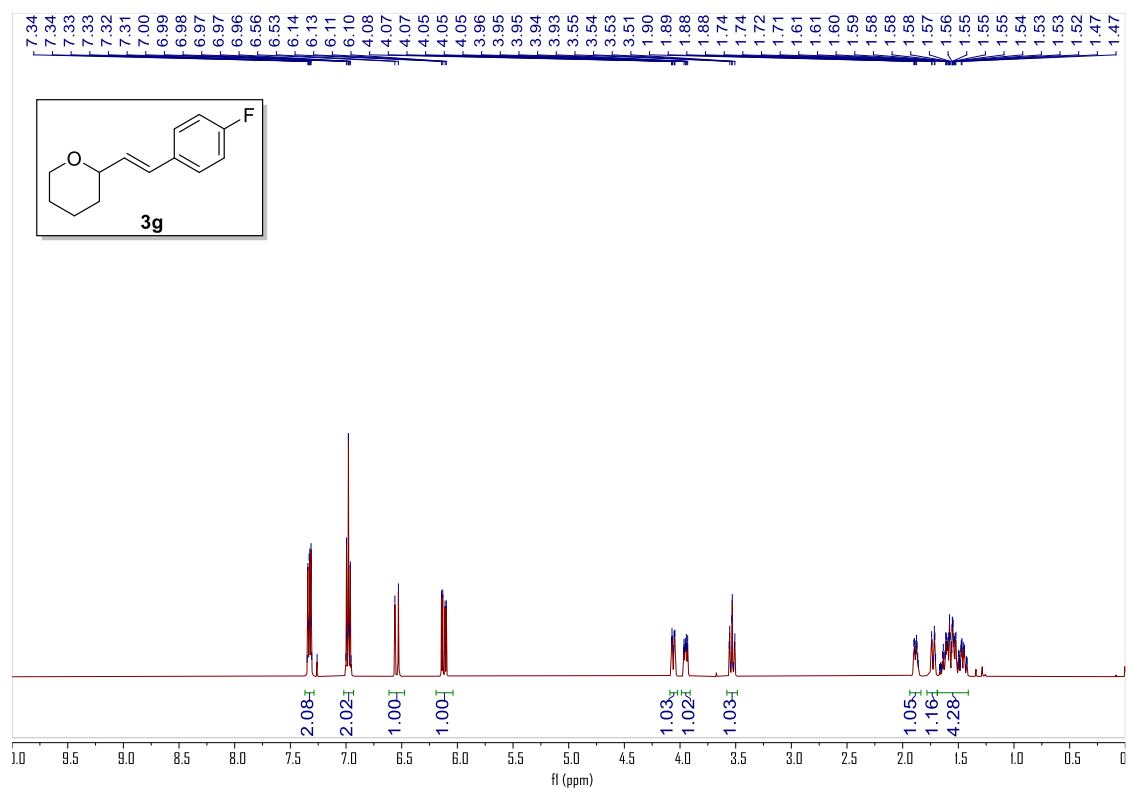

$^{13}\text{C}$  spectrum (126 MHz,  $\text{CDCl}_3$ )

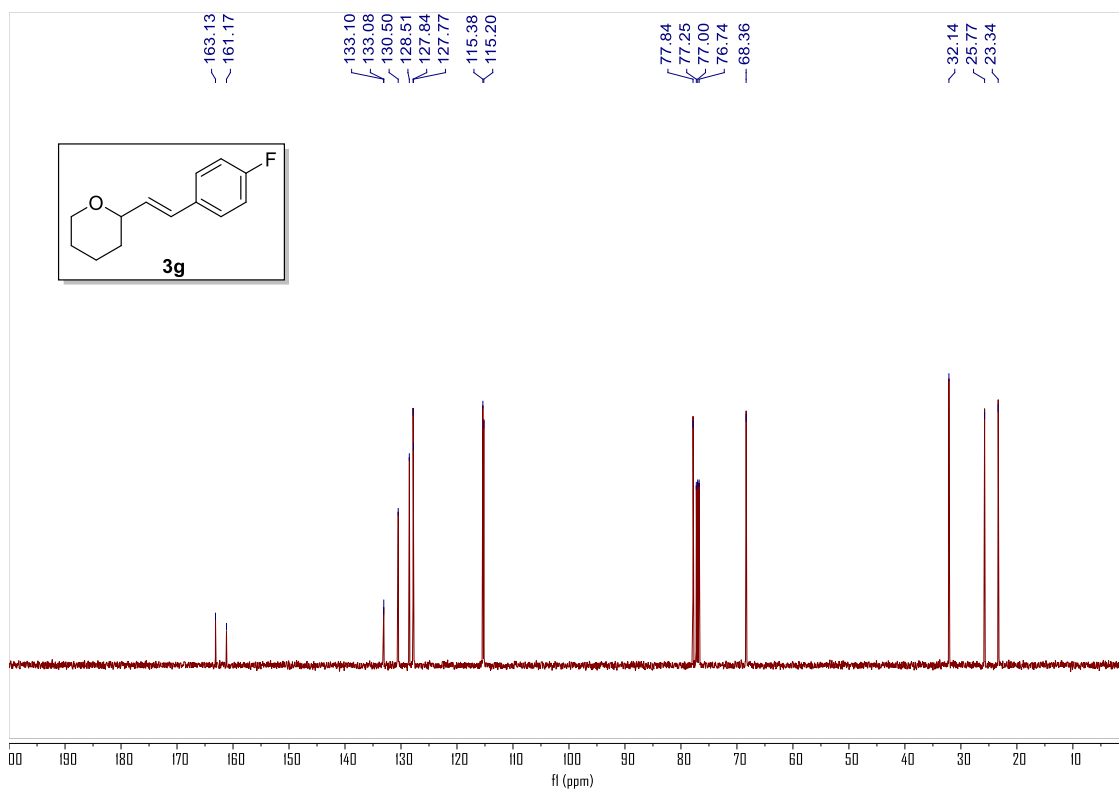

$^{19}\text{F}$  spectrum (471 MHz,  $\text{CDCl}_3$ )

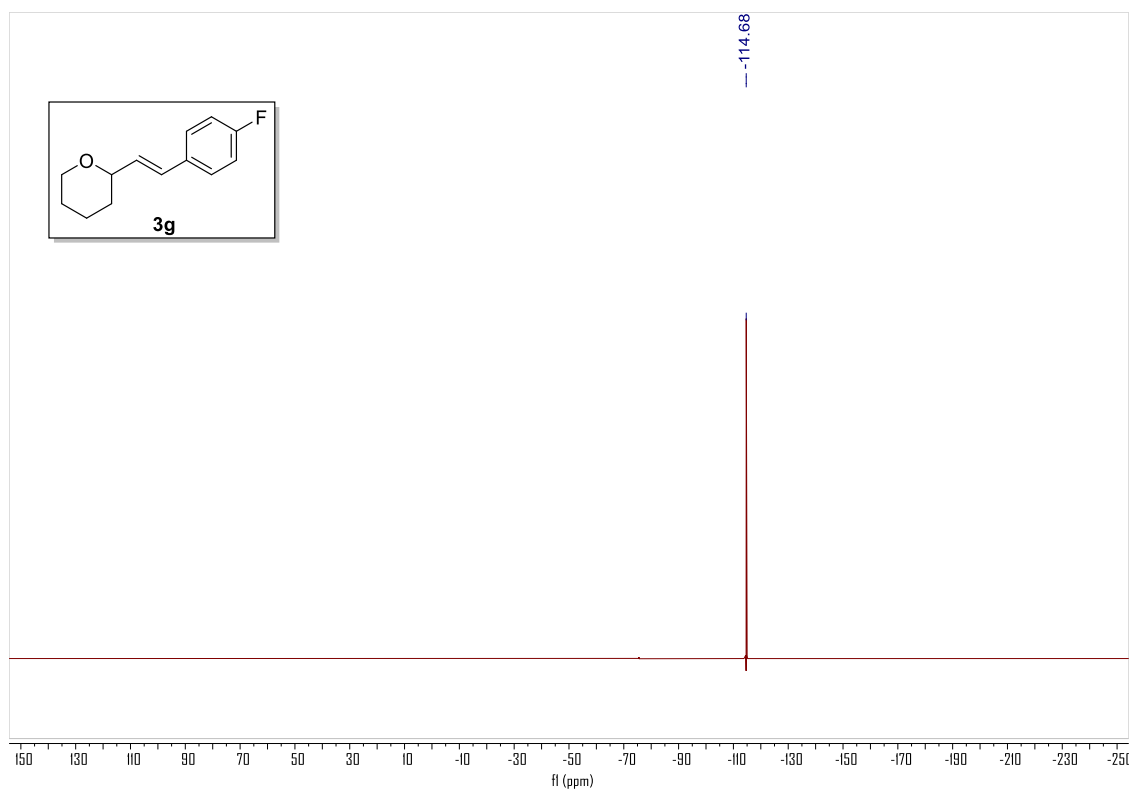



### (E)-2-(4-chlorostyryl)tetrahydro-2H-pyran (**3h**)

<sup>1</sup>H spectrum (500 MHz, CDCl<sub>3</sub>)

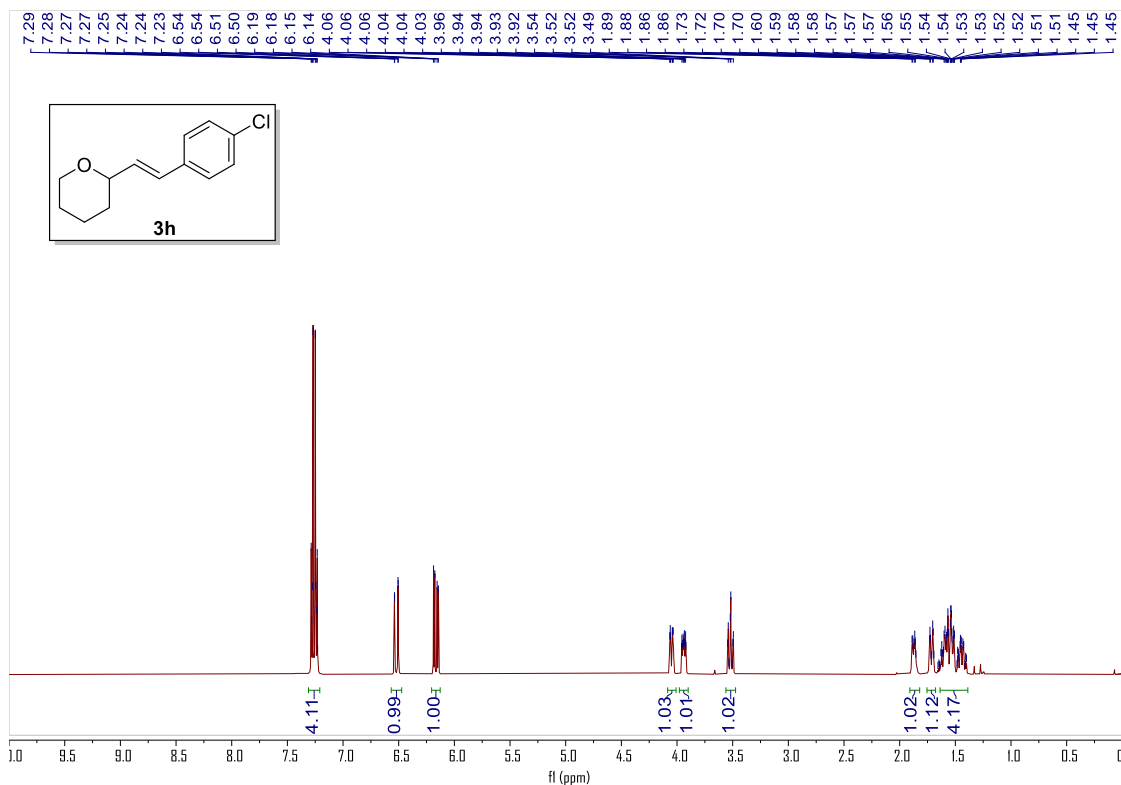

<sup>13</sup>C spectrum (126 MHz, CDCl<sub>3</sub>)

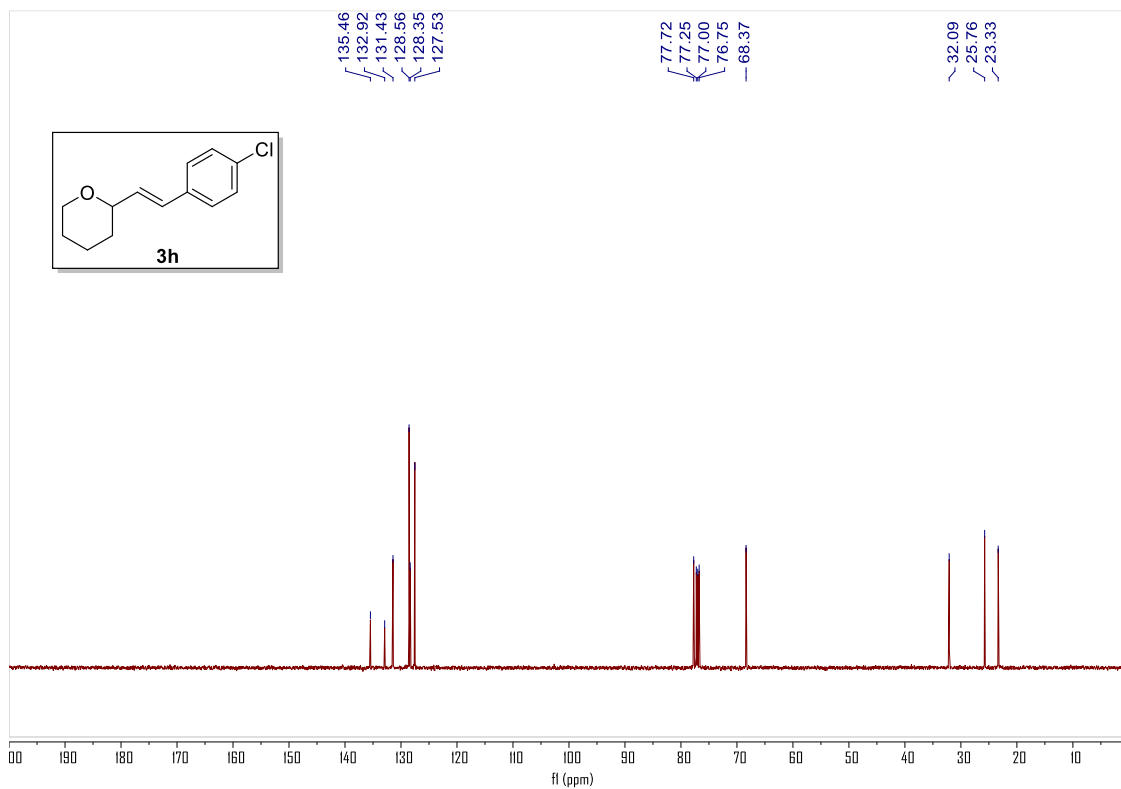

### (E)-2-(4-bromostyryl)tetrahydro-2H-pyran (**3i**)

<sup>1</sup>H spectrum (500 MHz, CDCl<sub>3</sub>)

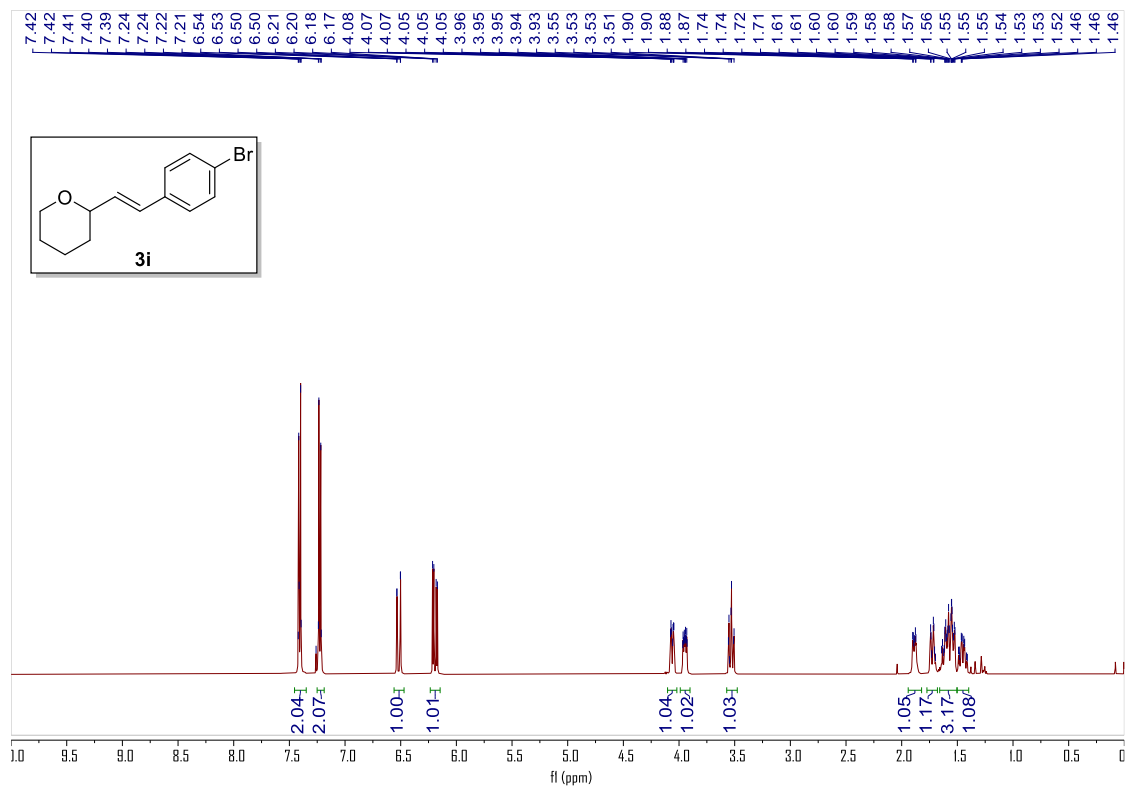

<sup>13</sup>C spectrum (126 MHz, CDCl<sub>3</sub>)

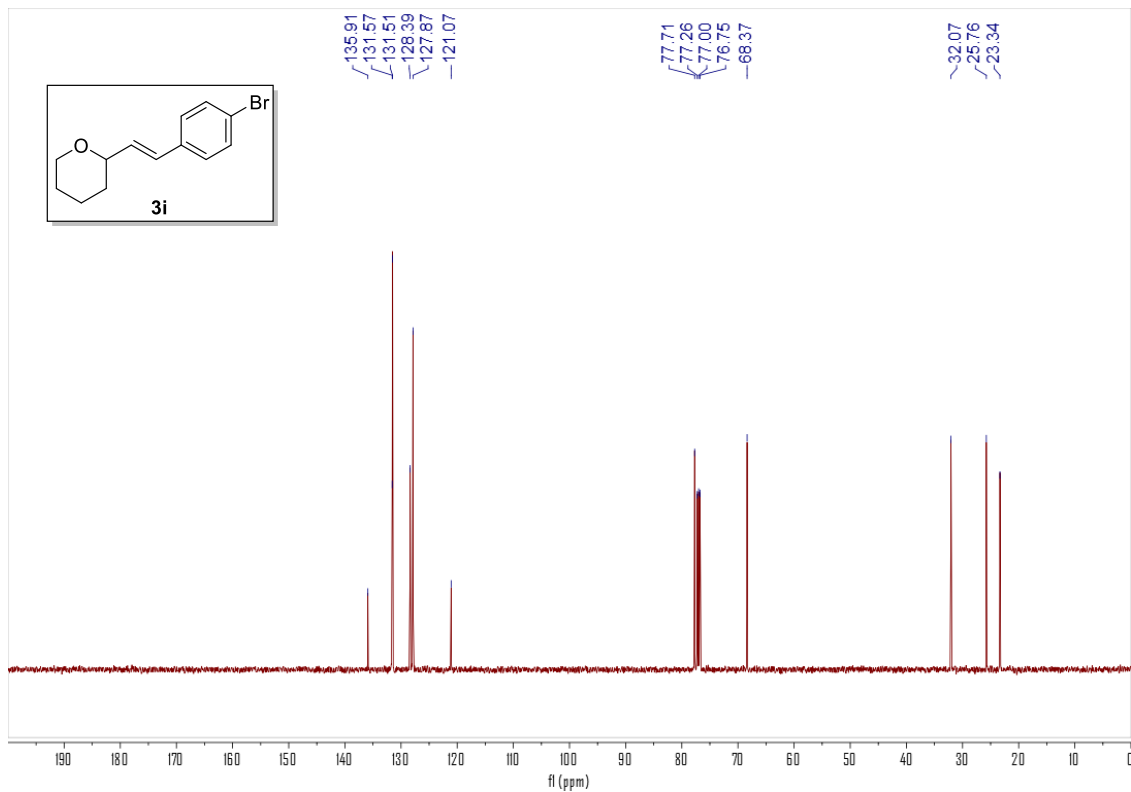

### (E)-2-(3-methoxystyryl)tetrahydro-2H-pyran (3j)

<sup>1</sup>H spectrum (400 MHz, CDCl<sub>3</sub>)

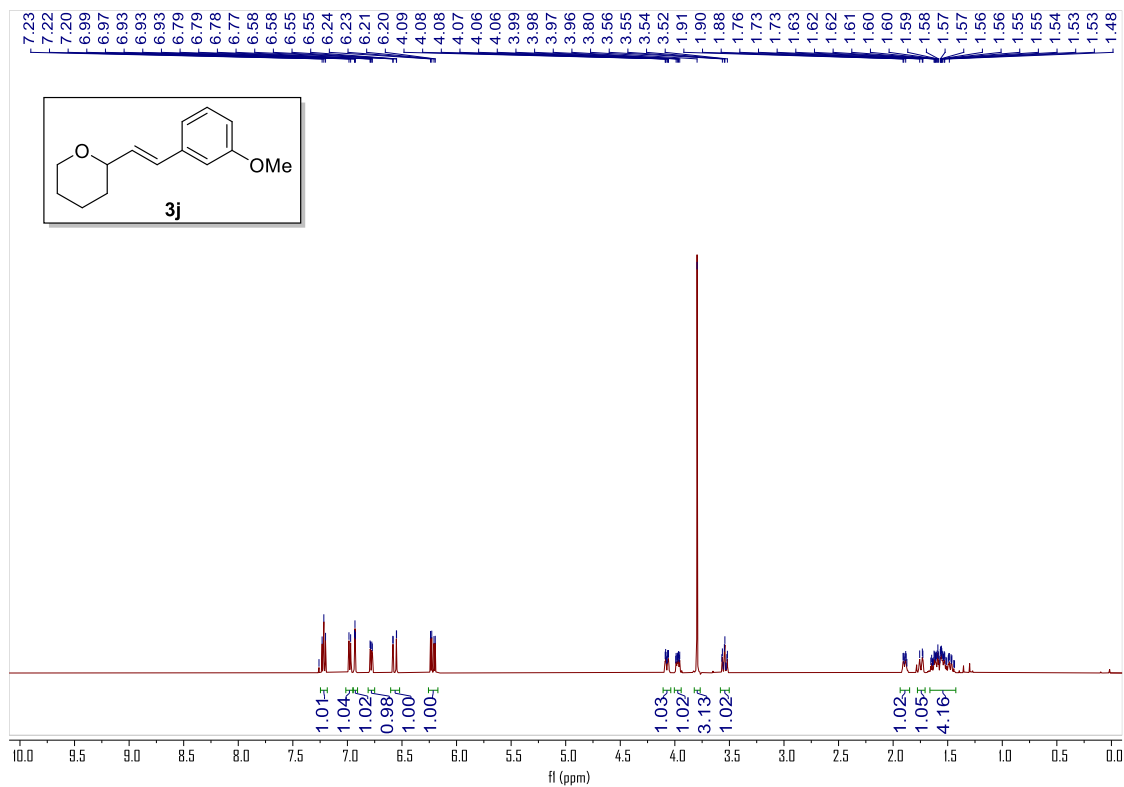

<sup>13</sup>C spectrum (126 MHz, CDCl<sub>3</sub>)

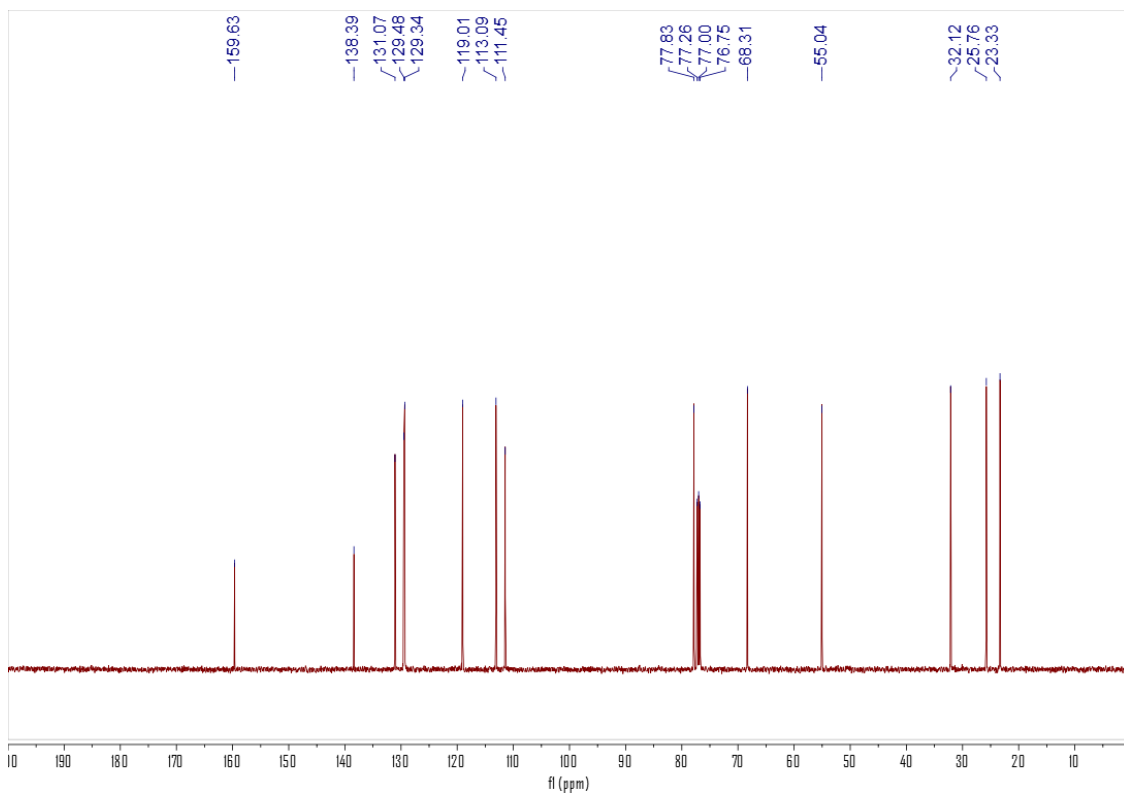

### (E)-2-(2-methoxystyryl)tetrahydro-2H-pyran (3k)

<sup>1</sup>H spectrum (500 MHz, CDCl<sub>3</sub>)

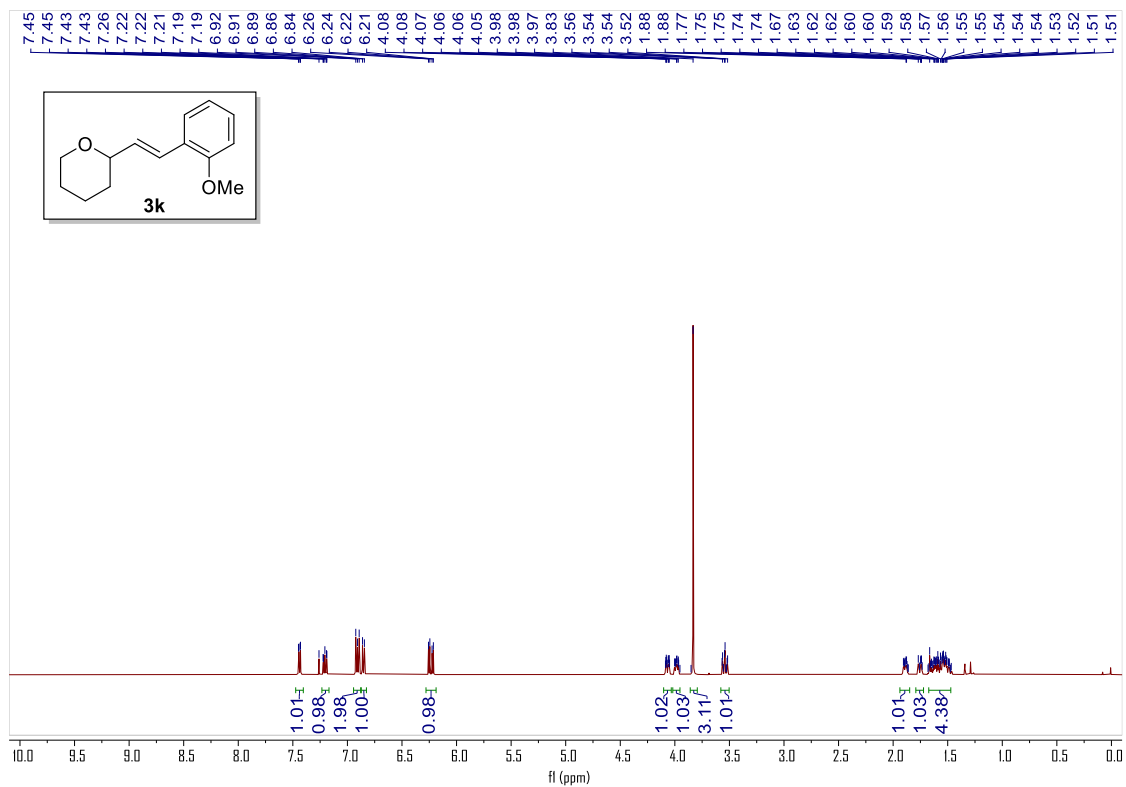

<sup>13</sup>C spectrum (126 MHz, CDCl<sub>3</sub>)

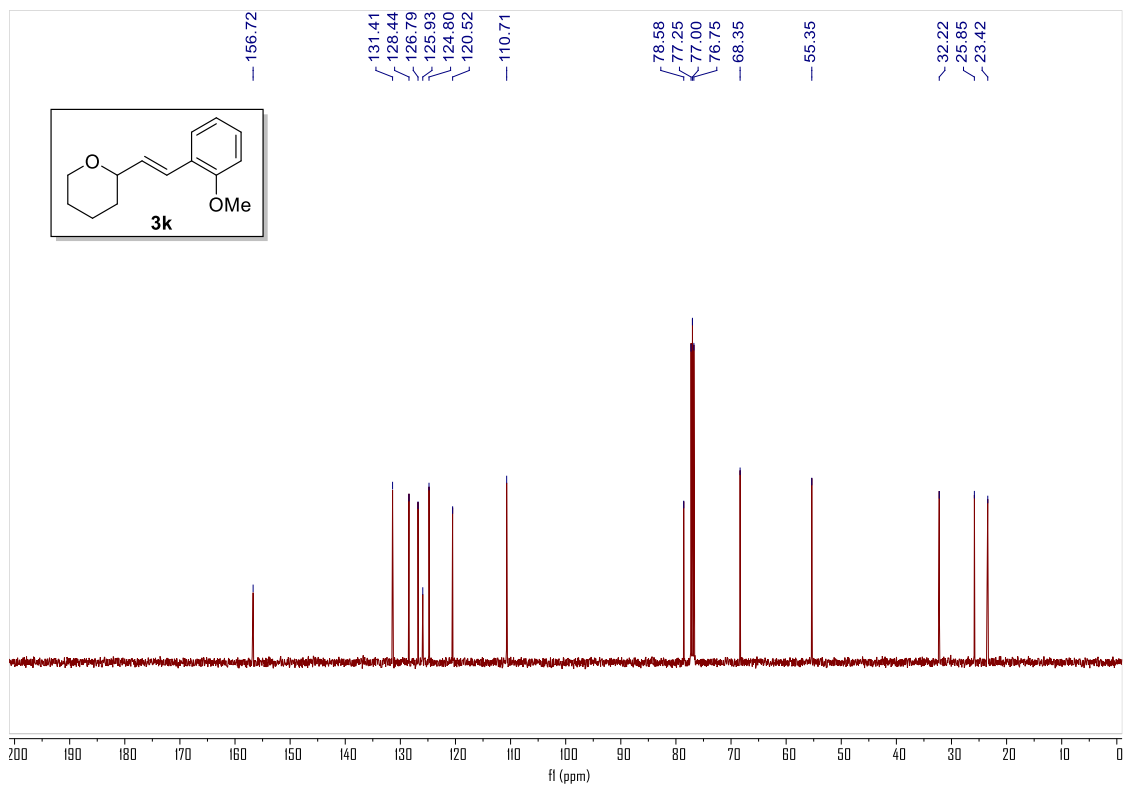

**(E)-2-(2-(naphthalen-1-yl)vinyl)tetrahydro-2H-pyran (3I)**

$^1\text{H}$  spectrum (500 MHz,  $\text{CDCl}_3$ )

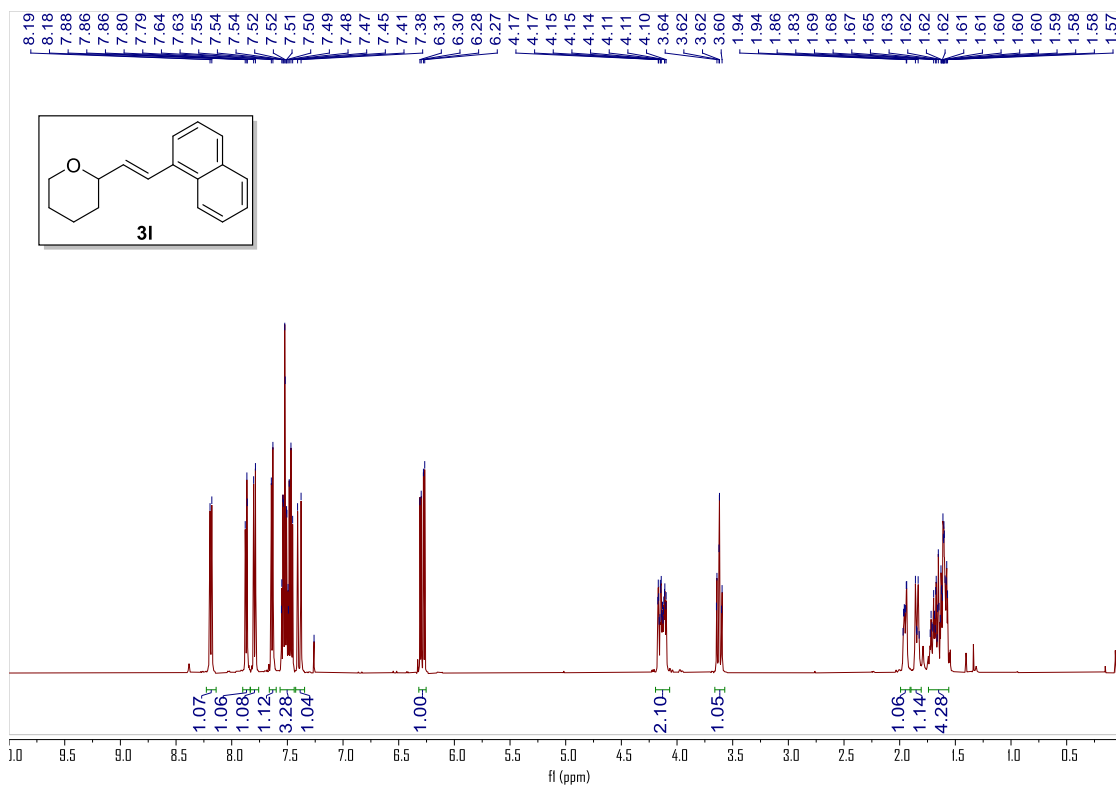

$^{13}\text{C}$  spectrum (126 MHz,  $\text{CDCl}_3$ )

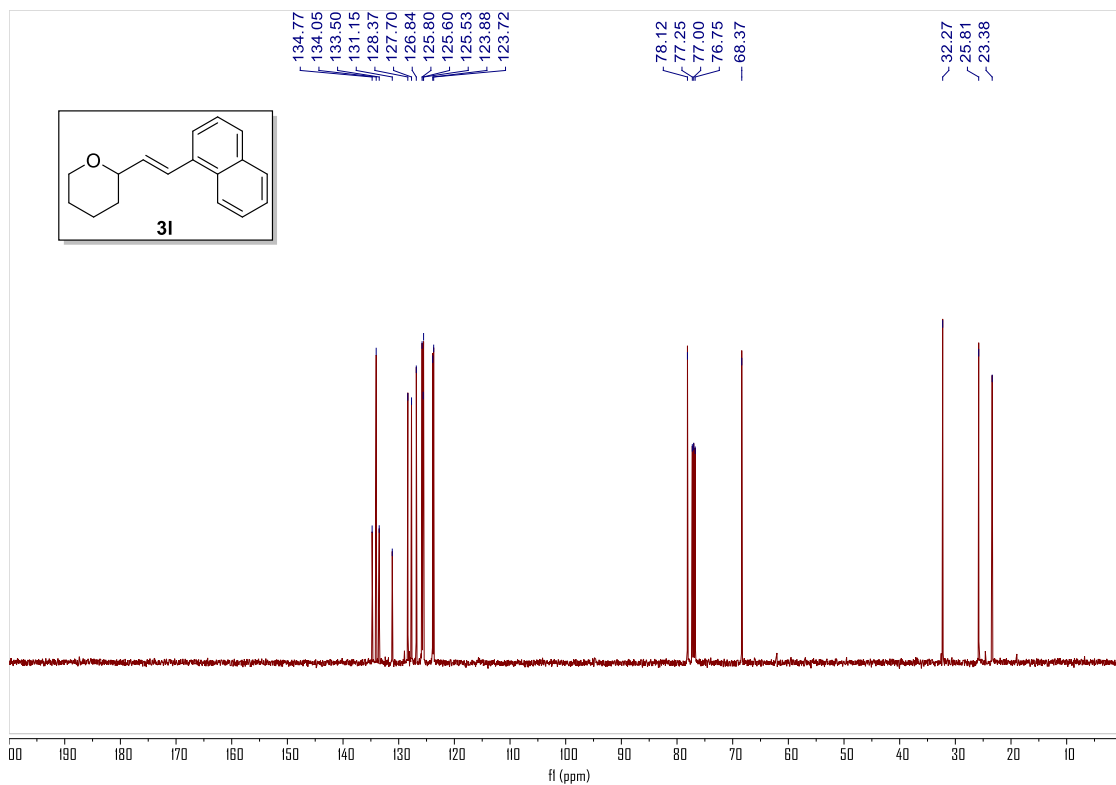

### (E)-2-(2-(thiophen-2-yl)vinyl)tetrahydro-2H-pyran (3m)

<sup>1</sup>H spectrum (500 MHz, CDCl<sub>3</sub>)

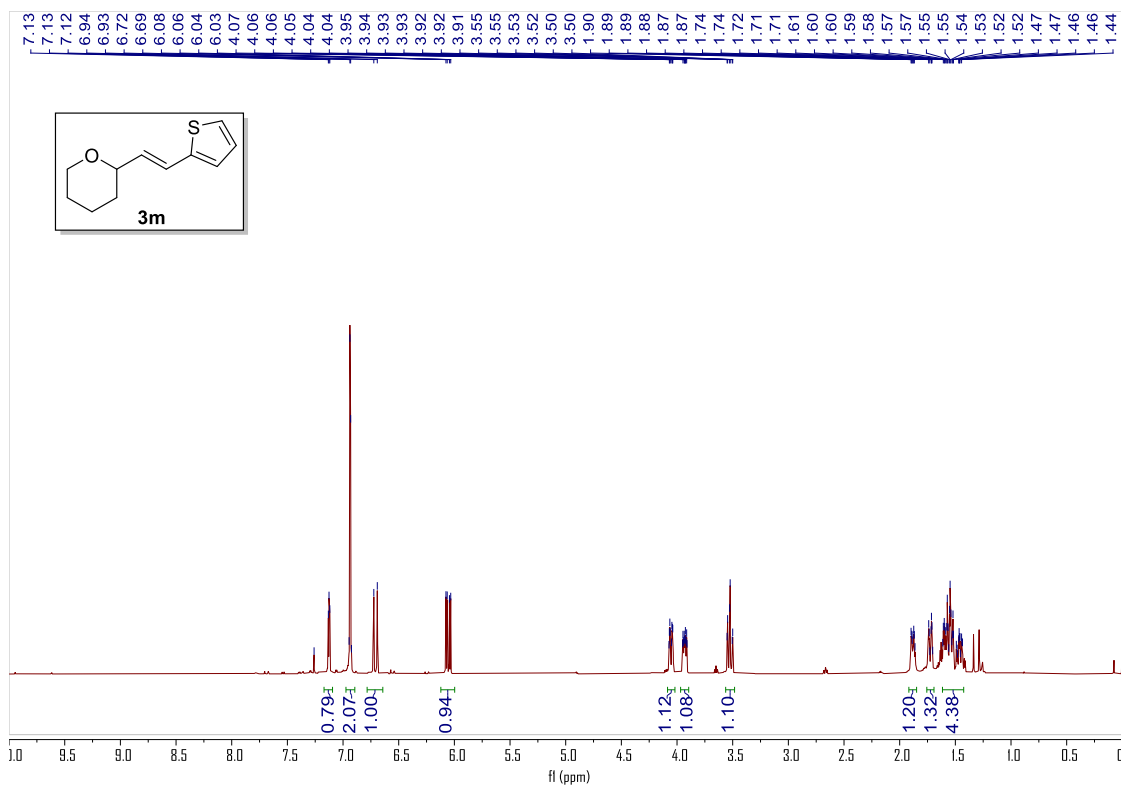

<sup>13</sup>C spectrum (126 MHz, CDCl<sub>3</sub>)

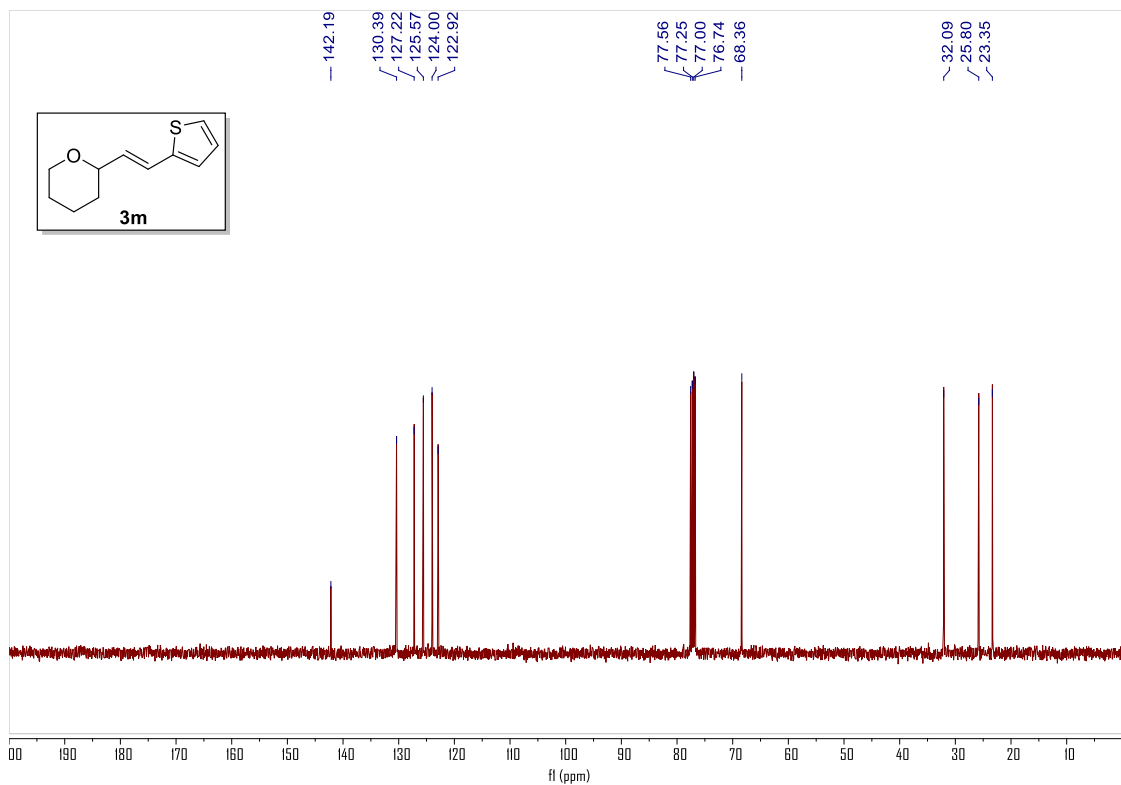

### (E)-2-(2-(thiophen-3-yl)vinyl)tetrahydro-2H-pyran (3n)

<sup>1</sup>H spectrum (500 MHz, CDCl<sub>3</sub>)

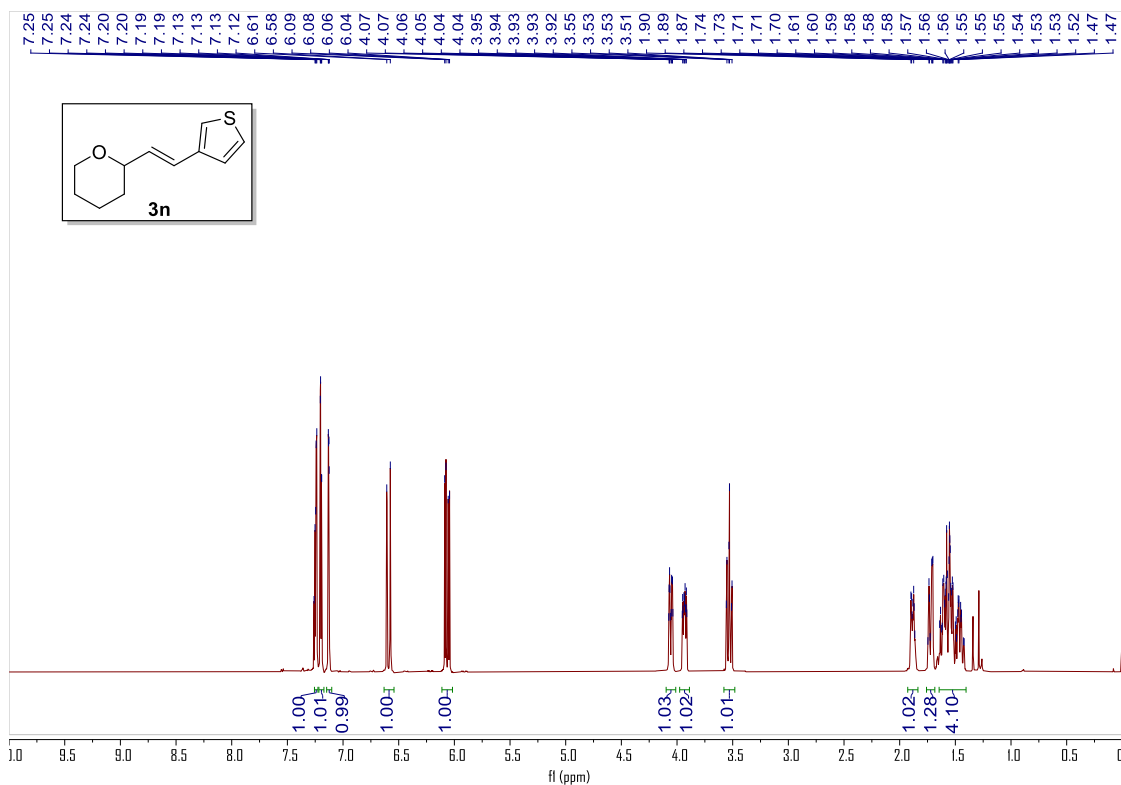

<sup>13</sup>C spectrum (126 MHz, CDCl<sub>3</sub>)

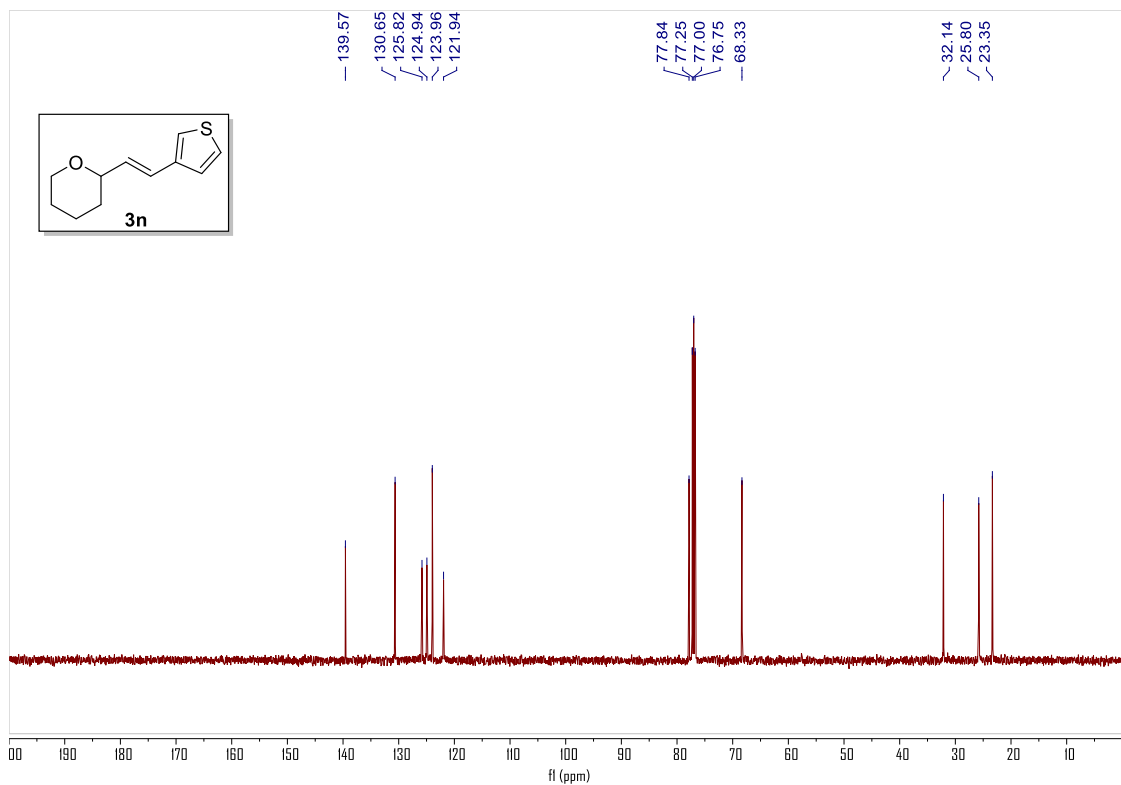

### (E)-2-(2-cyclopropylvinyl)tetrahydro-2H-pyran (3o)

<sup>1</sup>H spectrum (500 MHz, CDCl<sub>3</sub>)

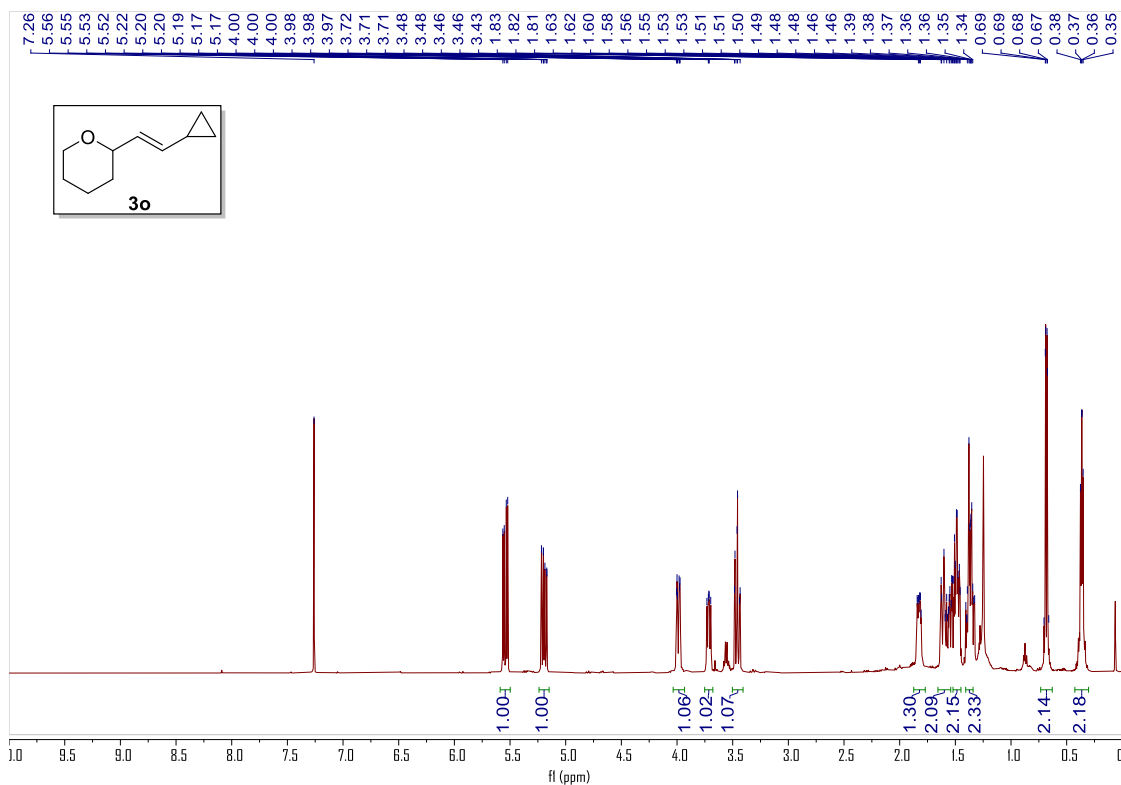

<sup>13</sup>C spectrum (126 MHz, CDCl<sub>3</sub>)

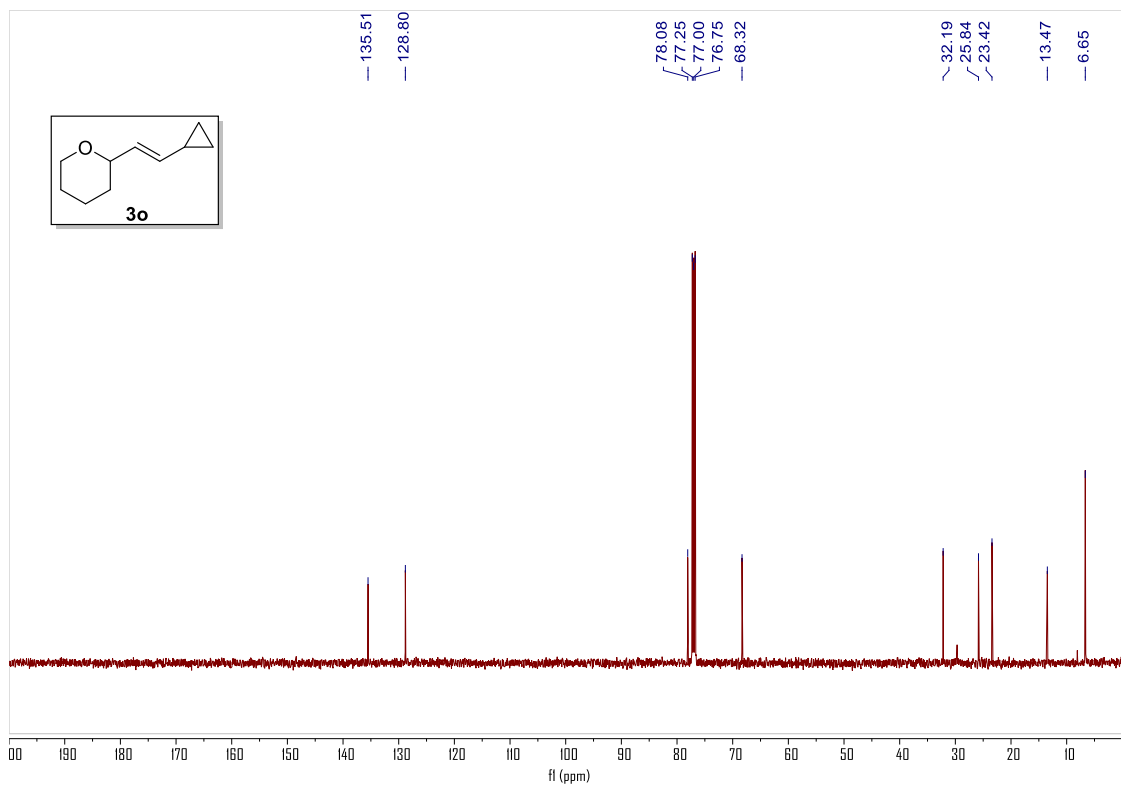



### (E)-2-(dec-1-en-1-yl)tetrahydro-2H-pyran (3p)

$^1\text{H}$  spectrum (500 MHz,  $\text{CDCl}_3$ )

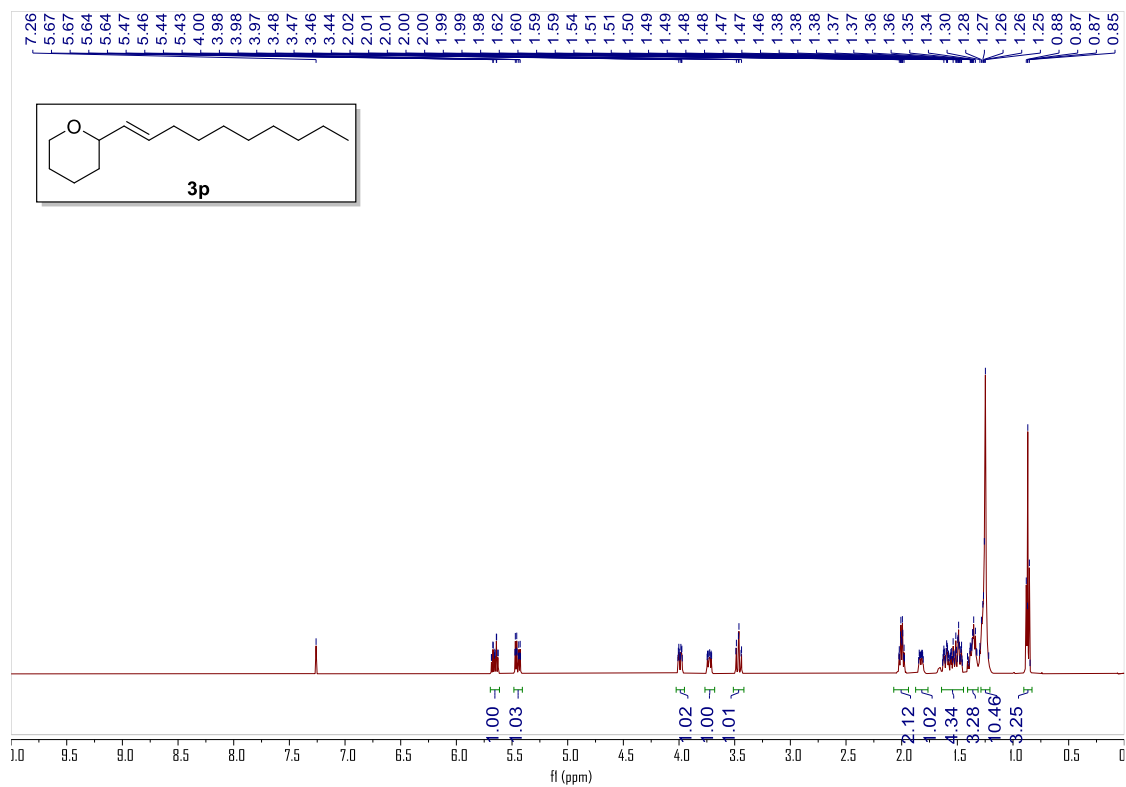

$^{13}\text{C}$  spectrum (126 MHz,  $\text{CDCl}_3$ )

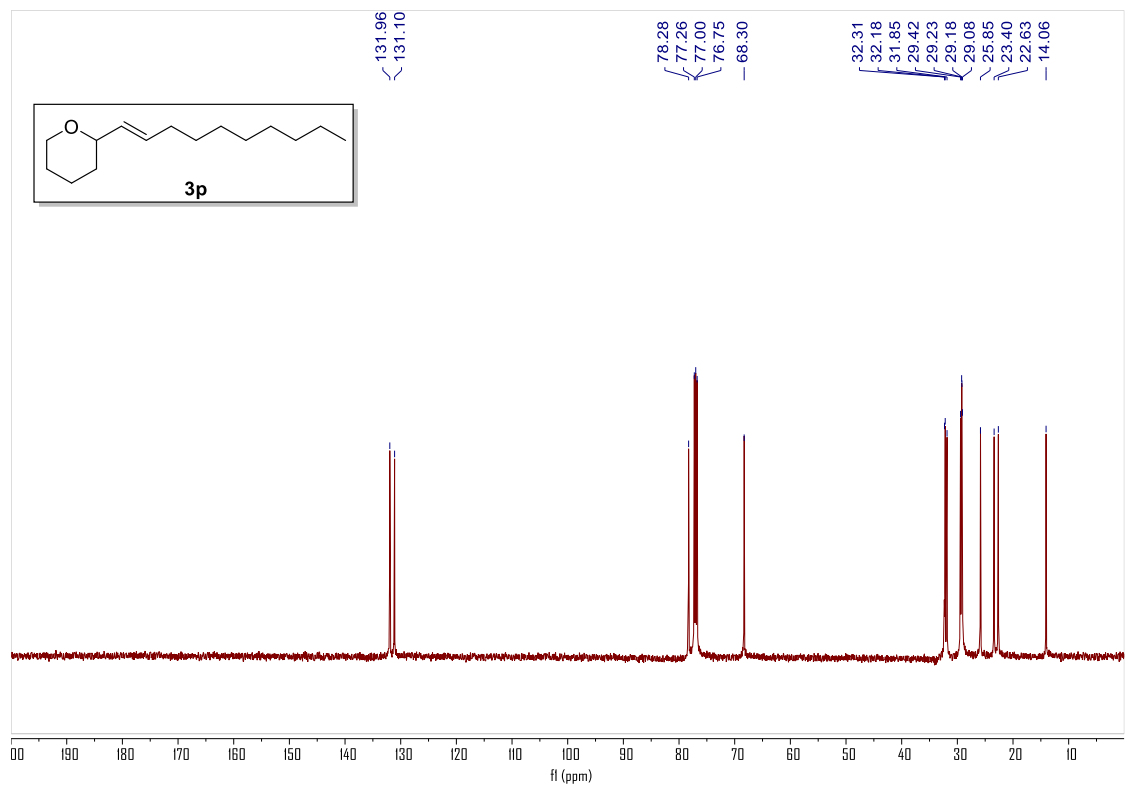

### (E)-2-(6-chlorohex-1-en-1-yl)tetrahydro-2H-pyran (3q)

<sup>1</sup>H spectrum (500 MHz, CDCl<sub>3</sub>)

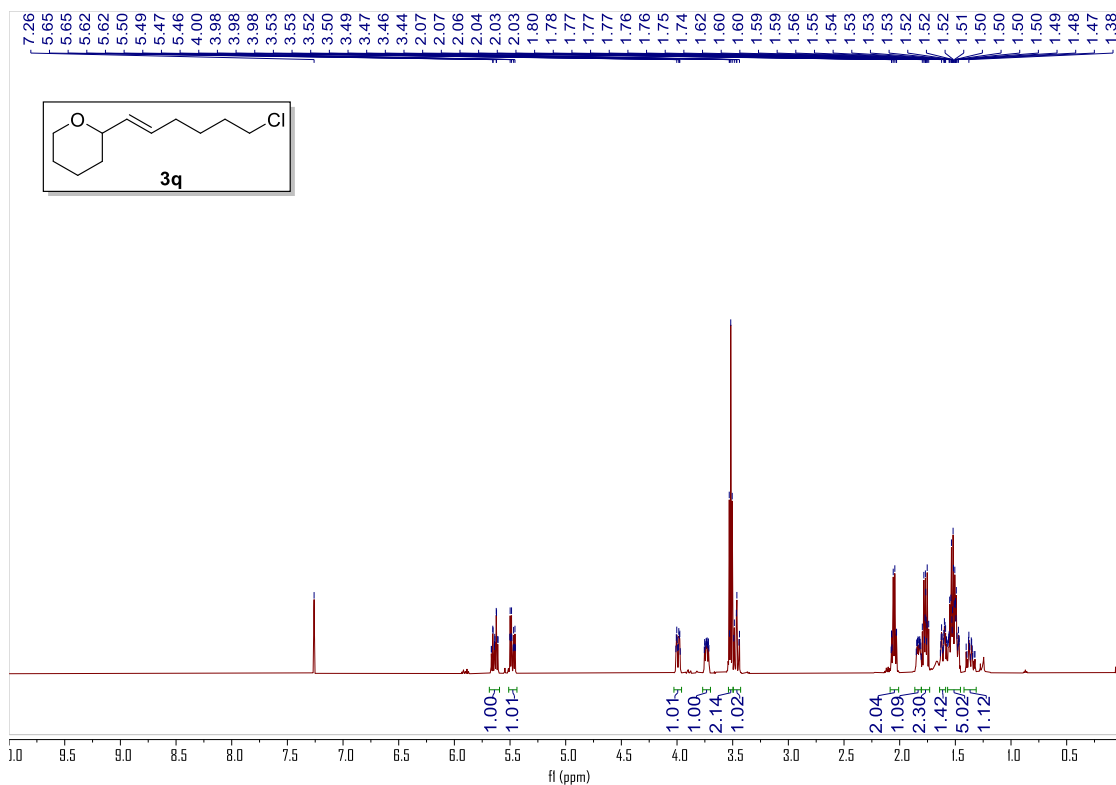

<sup>13</sup>C spectrum (126 MHz, CDCl<sub>3</sub>)

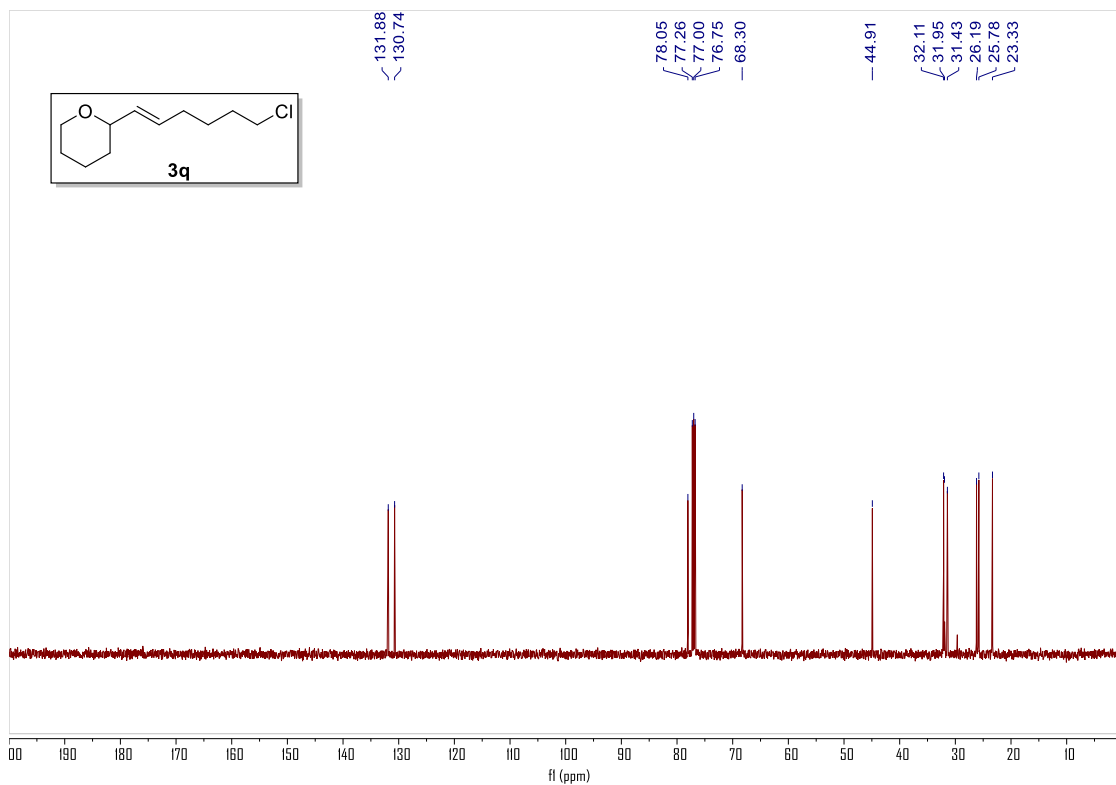

## 2-(4-methoxyphenyl)tetrahydro-2H-pyran (3r)

$^1\text{H}$  spectrum (500 MHz,  $\text{CDCl}_3$ )

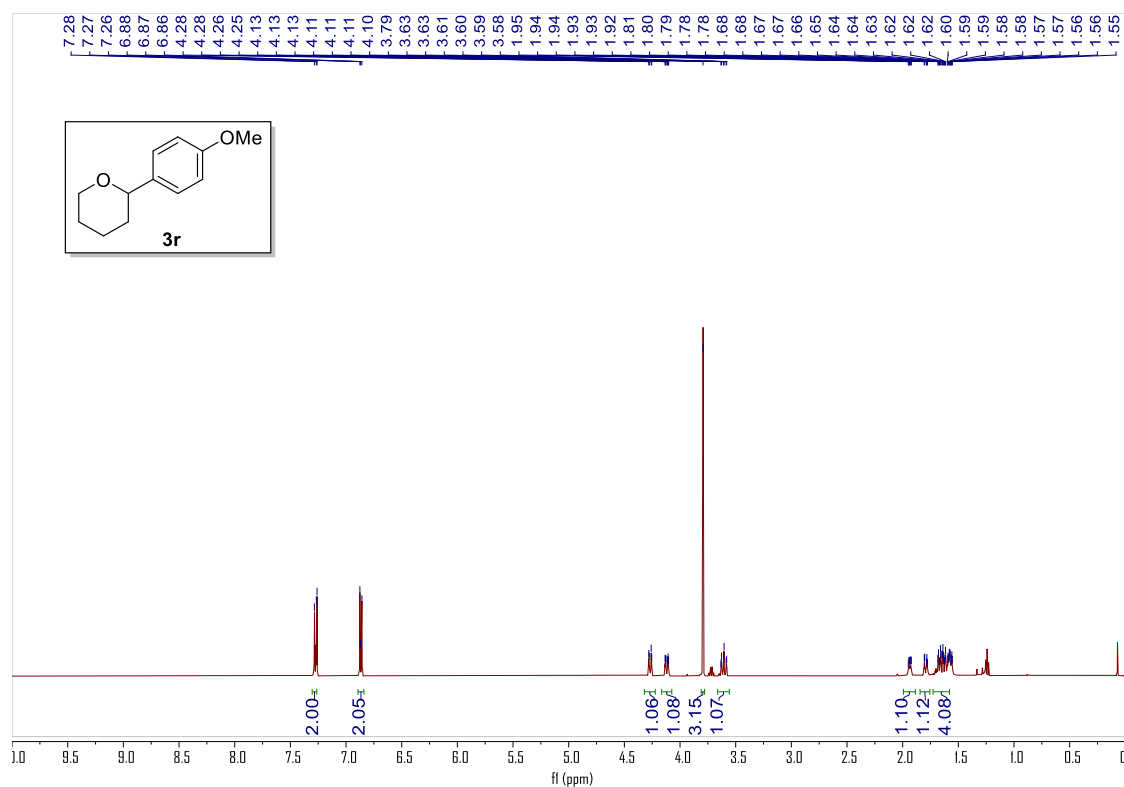

$^{13}\text{C}$  spectrum (126 MHz,  $\text{CDCl}_3$ )

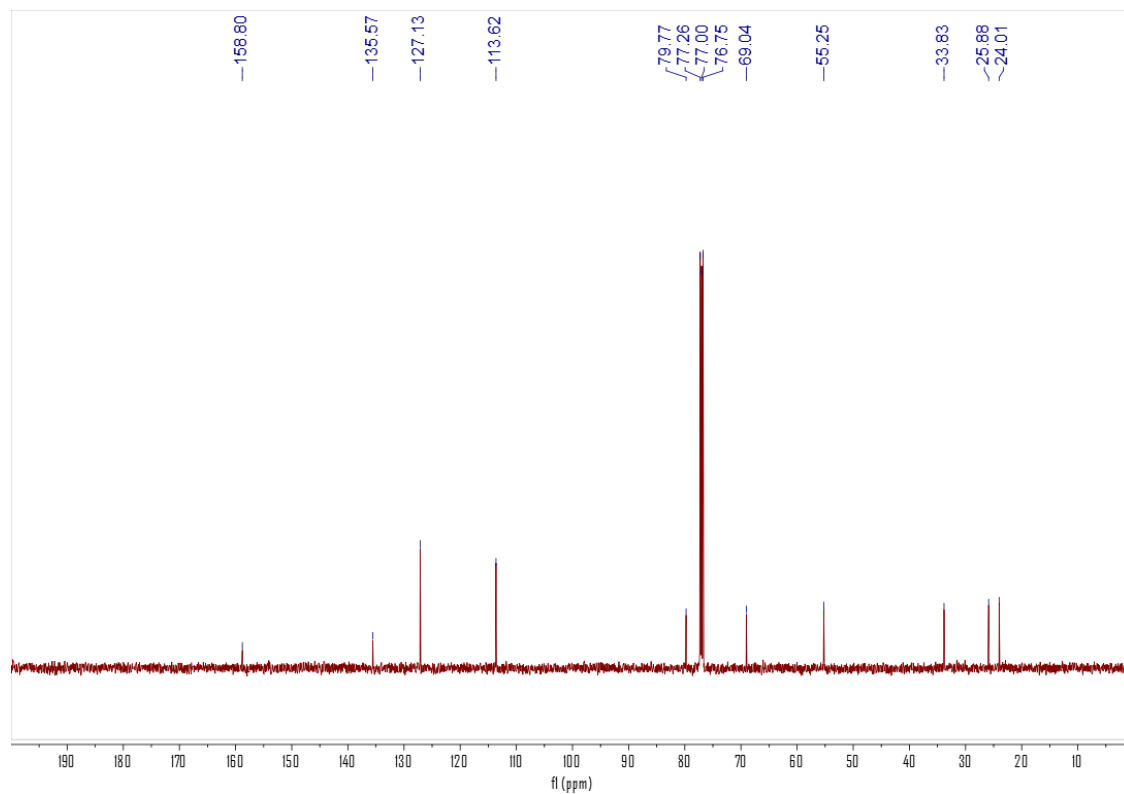

### (E)-4-((6-styryltetrahydro-2H-pyran-2-yl)methoxy)benzonitrile (5a)

<sup>1</sup>H spectrum (500 MHz, CDCl<sub>3</sub>)

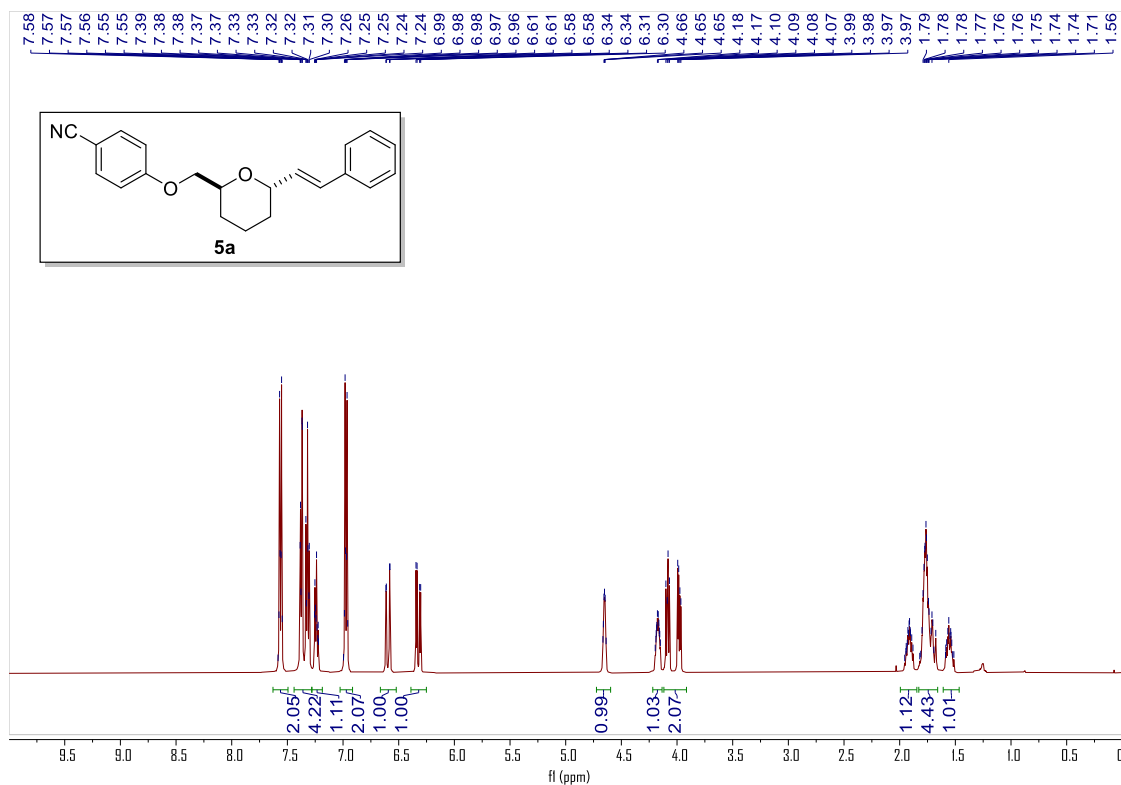

<sup>13</sup>C spectrum (126 MHz, CDCl<sub>3</sub>)

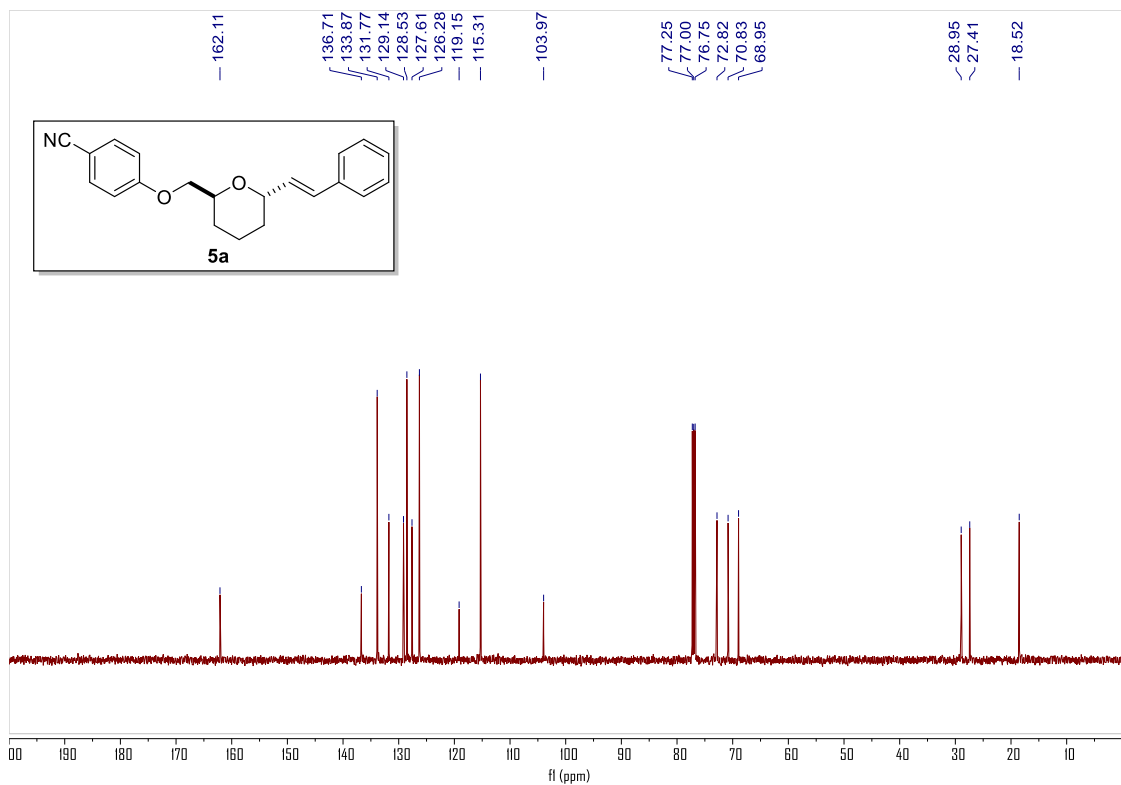

### (E)-2-((4-ethylphenoxy)methyl)-6-styryltetrahydro-2H-pyran (**5b**)

$^1\text{H}$  spectrum (500 MHz,  $\text{CDCl}_3$ )

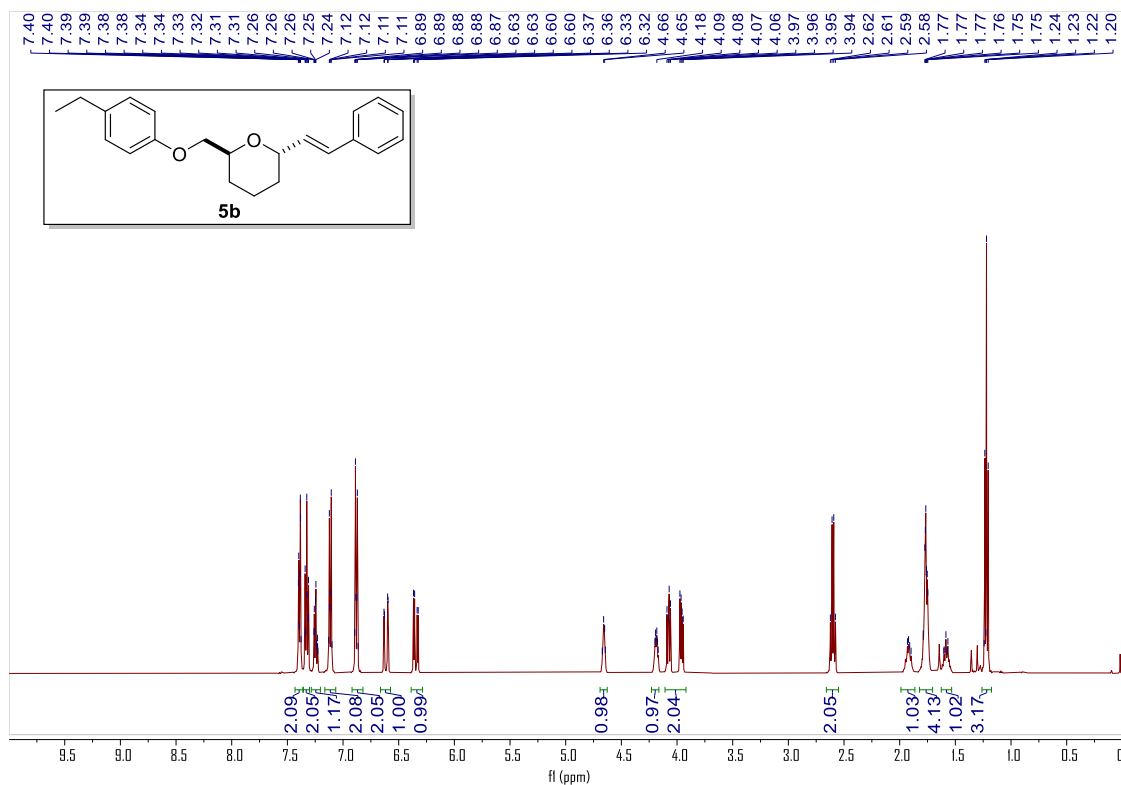

$^{13}\text{C}$  spectrum (126 MHz,  $\text{CDCl}_3$ )

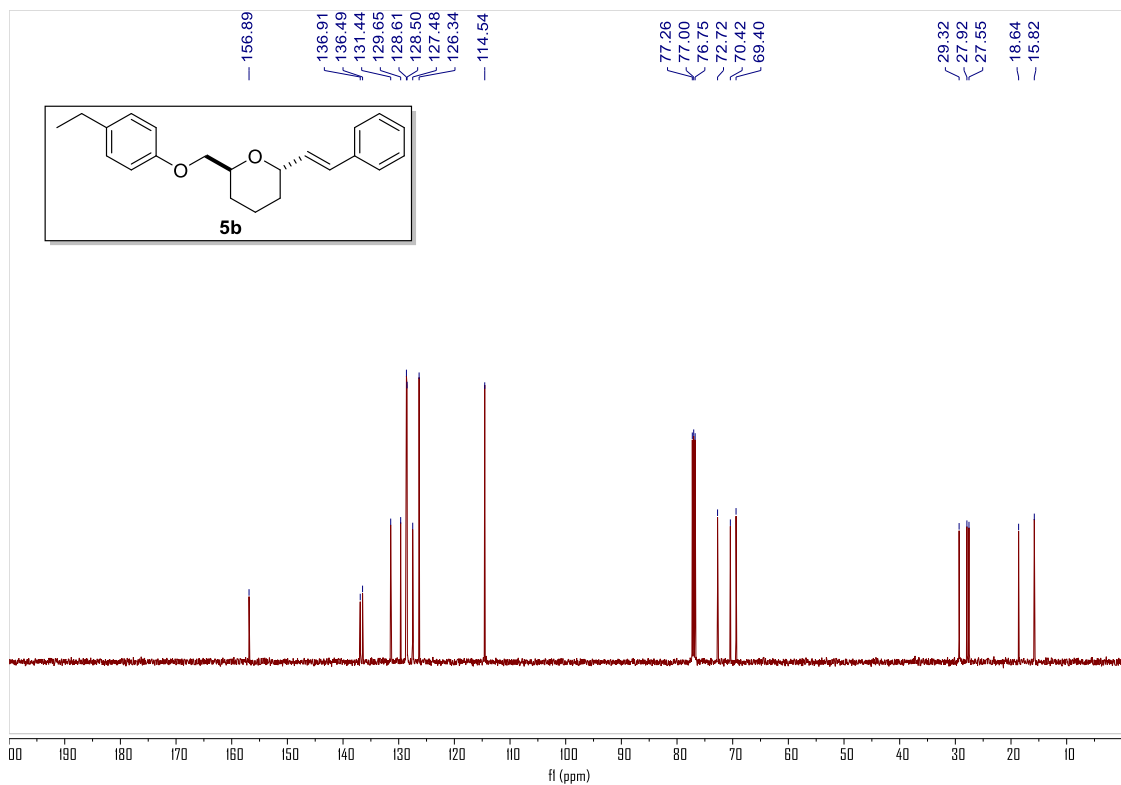

### (E)-2-((benzyloxy)methyl)-6-styryltetrahydro-2H-pyran (**5c**)

$^1\text{H}$  spectrum (500 MHz,  $\text{CDCl}_3$ )

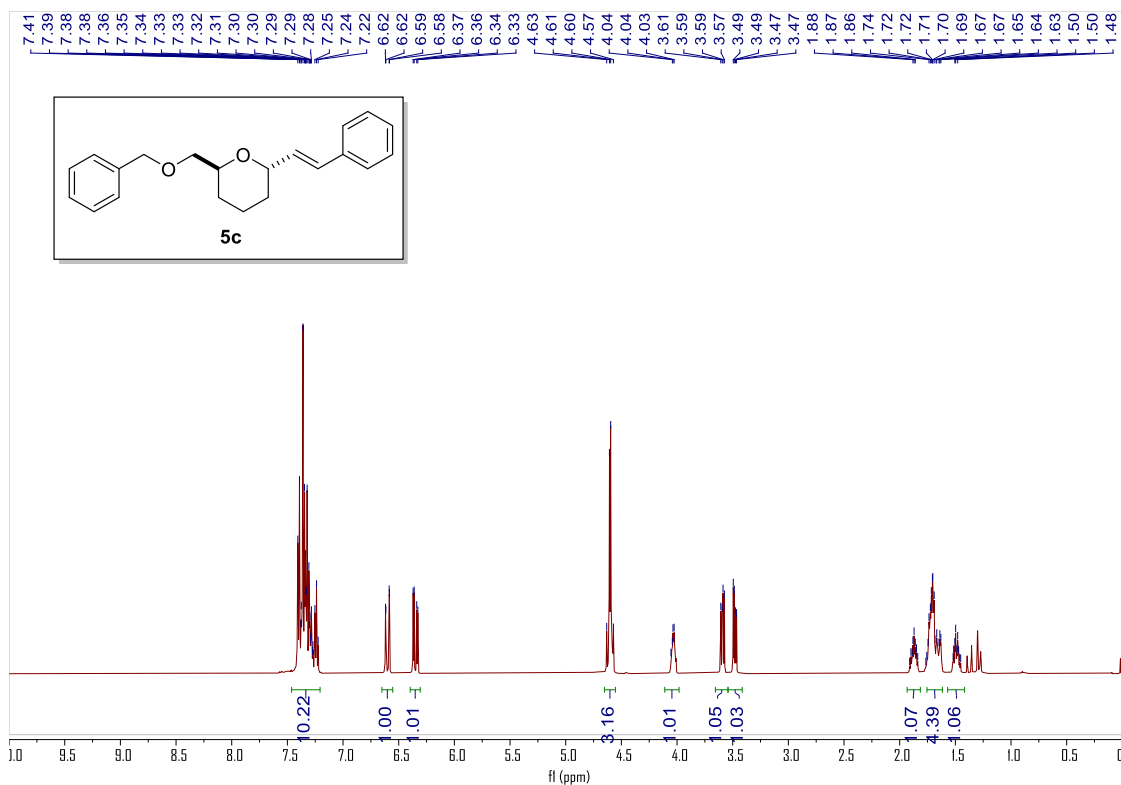

$^{13}\text{C}$  spectrum (126 MHz,  $\text{CDCl}_3$ )

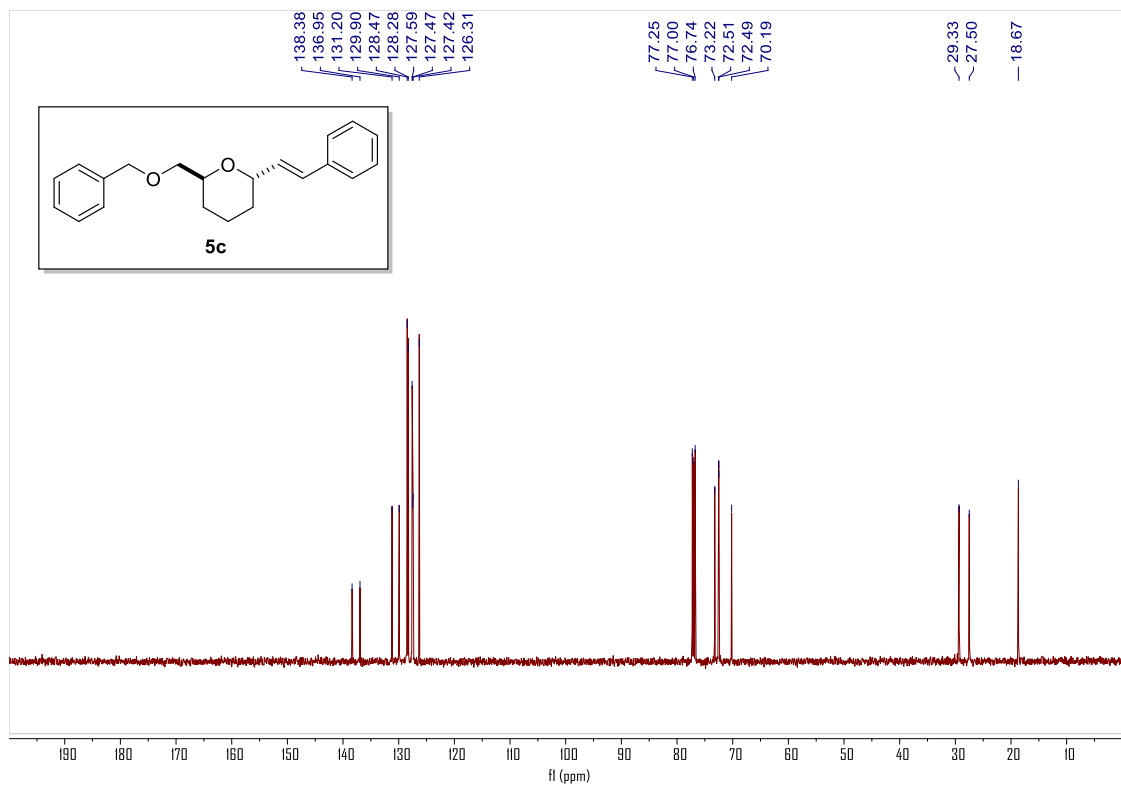

### (E)-2-(methoxymethyl)-6-styryltetrahydro-2H-pyran (5d)

$^1\text{H}$  spectrum (500 MHz,  $\text{CDCl}_3$ )

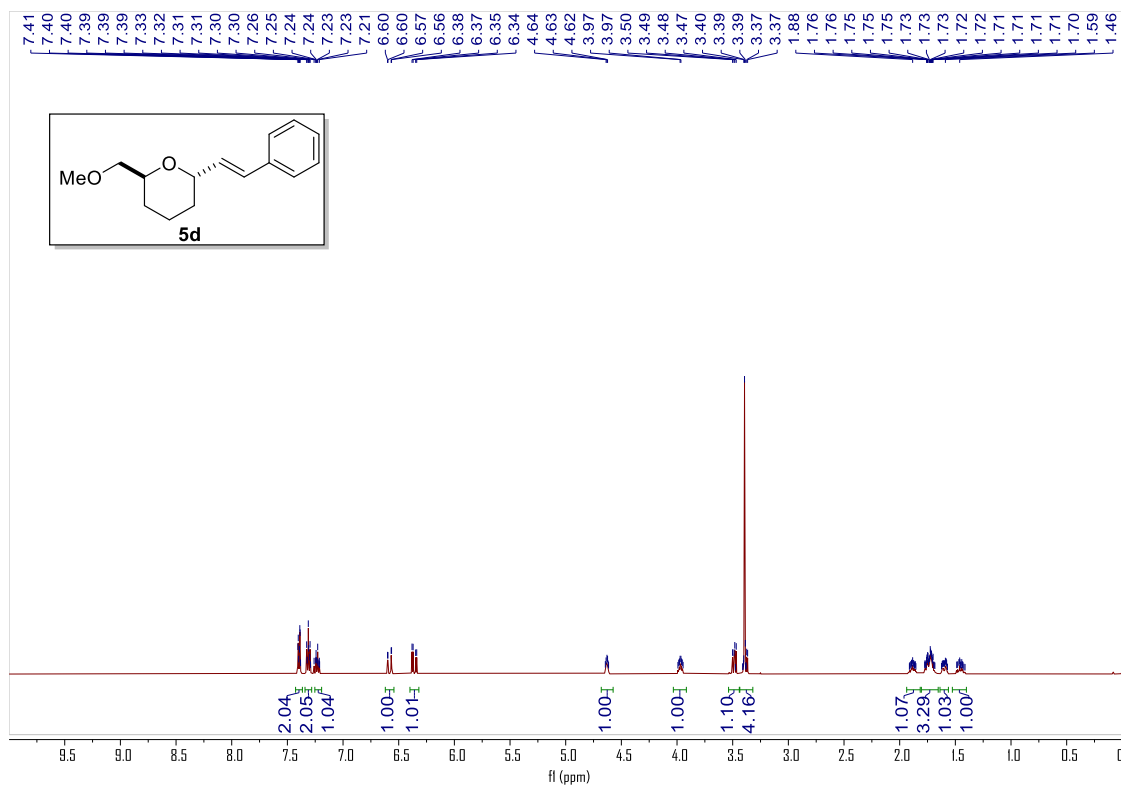

$^{13}\text{C}$  spectrum (126 MHz,  $\text{CDCl}_3$ )

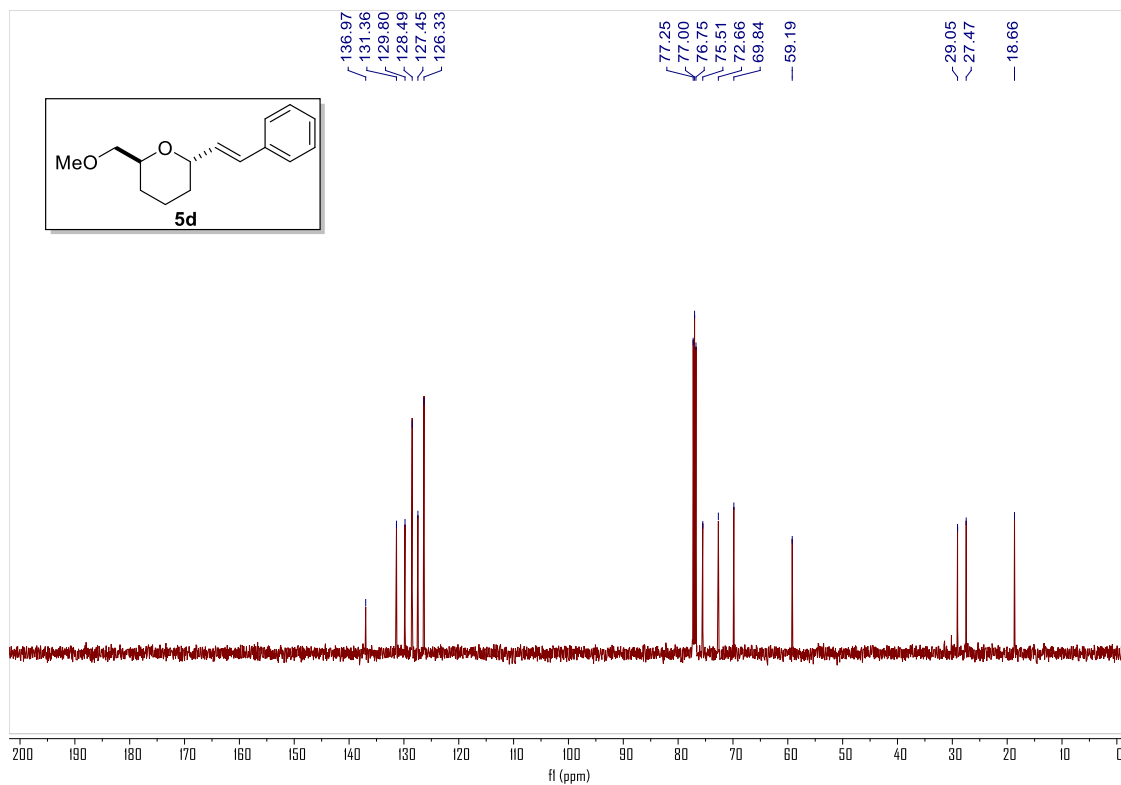

$^1\text{H } ^1\text{H COSY NMR}$

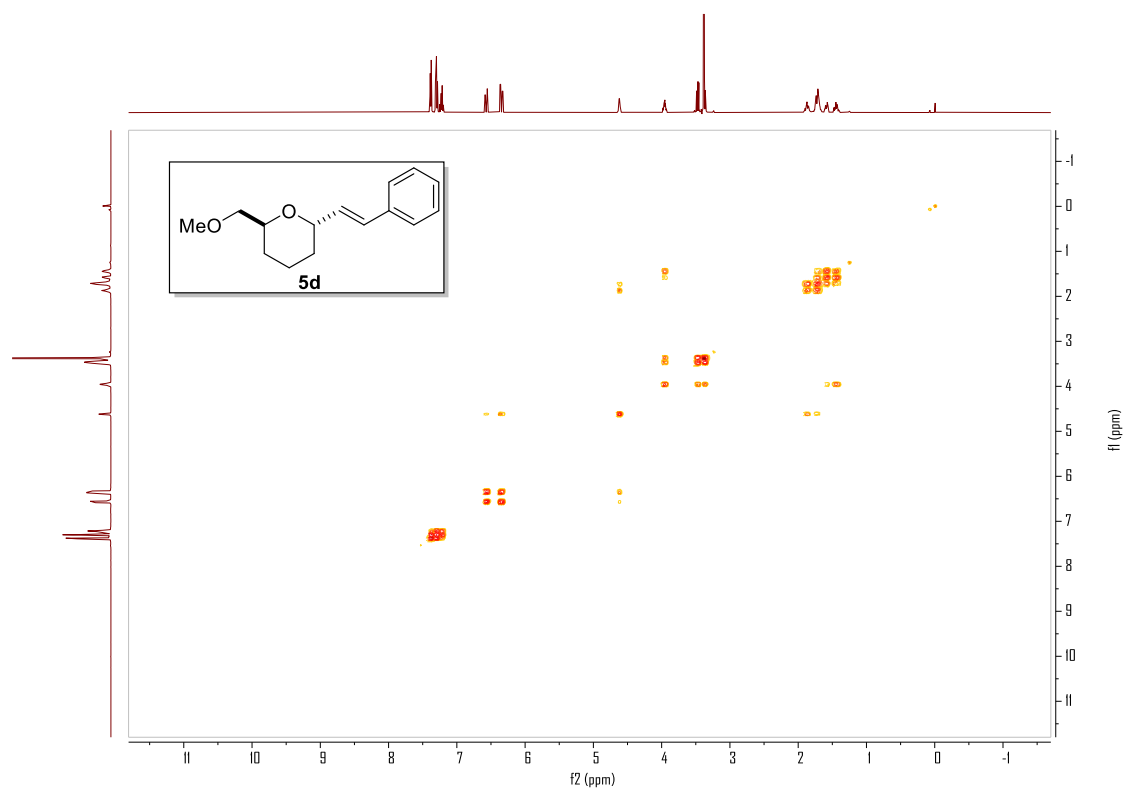

$^1\text{H } ^1\text{H NOESY NMR}$

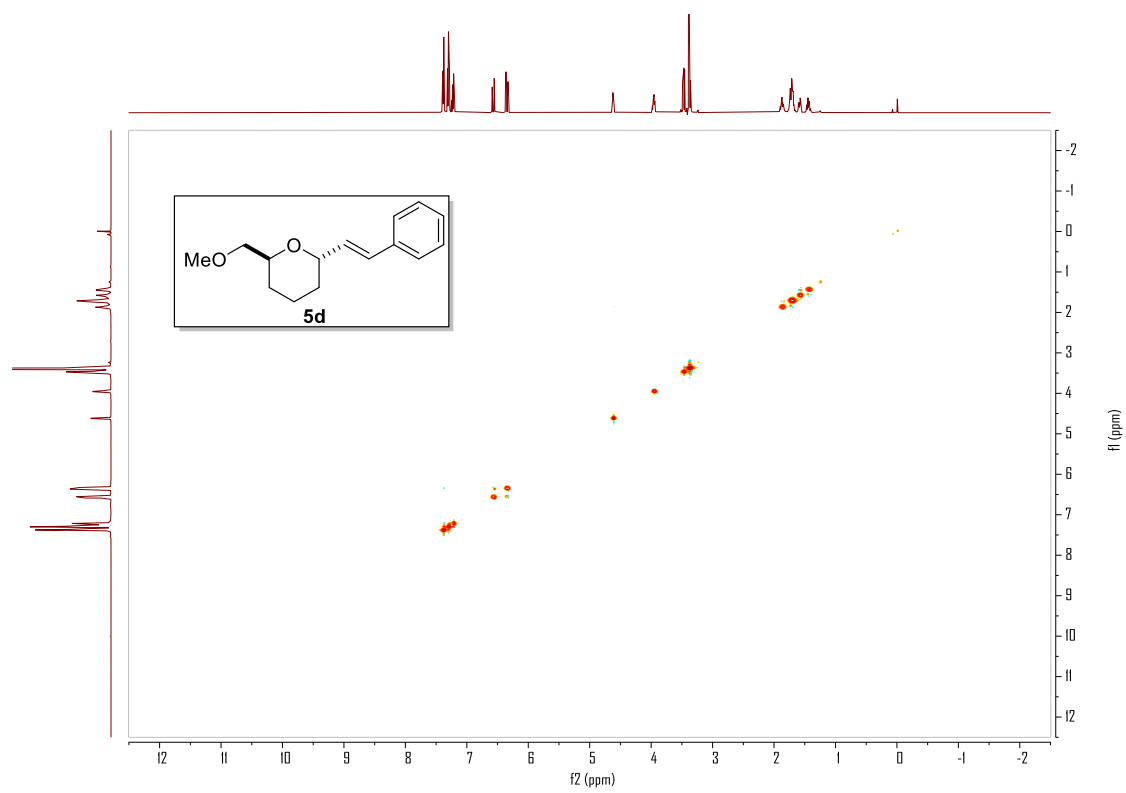



### (E)-2-(((4-methylbenzyl)oxy)methyl)-6-styryltetrahydro-2H-pyran (**5e**)

$^1\text{H}$  spectrum (500 MHz,  $\text{CDCl}_3$ )

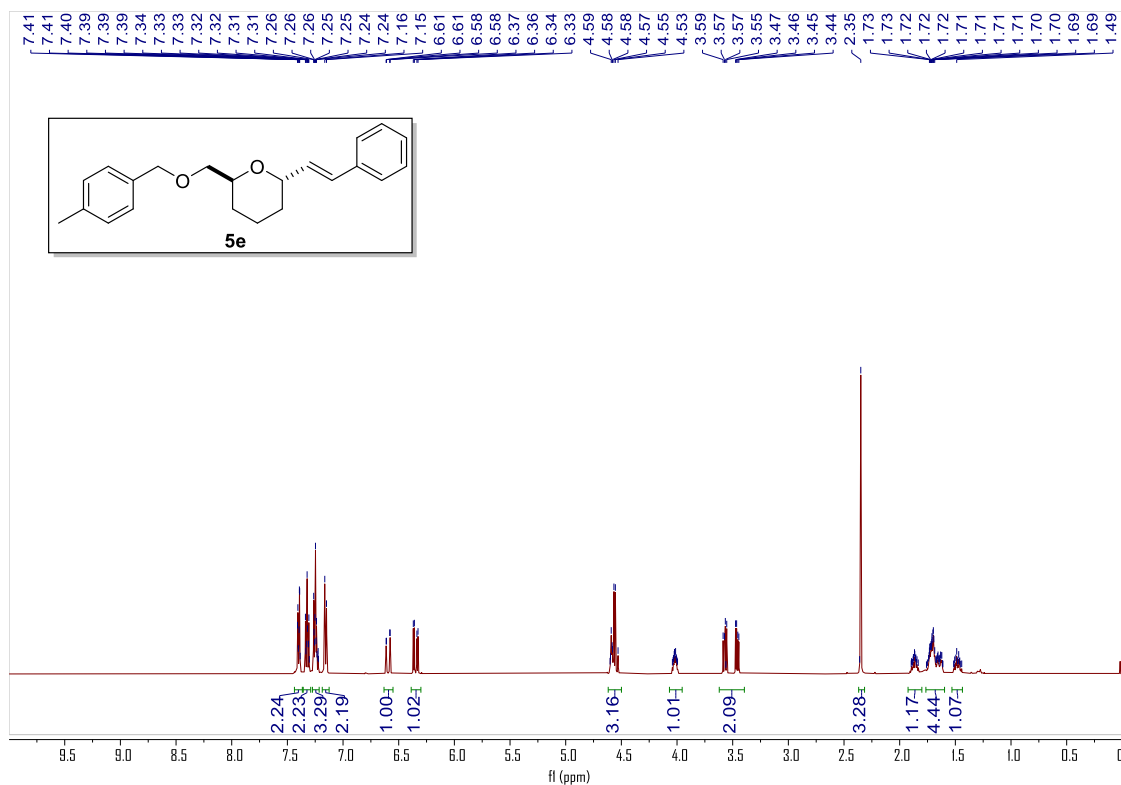

$^{13}\text{C}$  spectrum (126 MHz,  $\text{CDCl}_3$ )

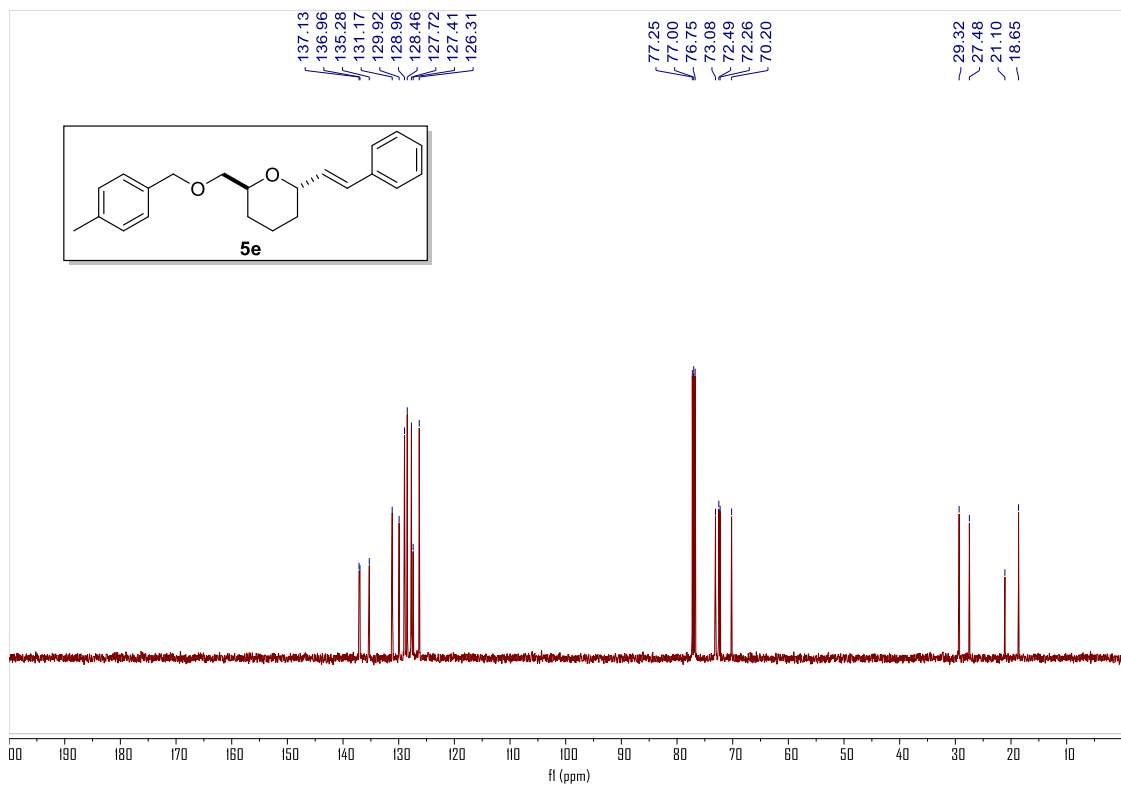

**(E)-2-(((1,1'-biphenyl]-4-ylmethoxy)methyl)-6-styryltetrahydro-2H-pyran (5f)**

$^1\text{H}$  spectrum (500 MHz,  $\text{CDCl}_3$ )

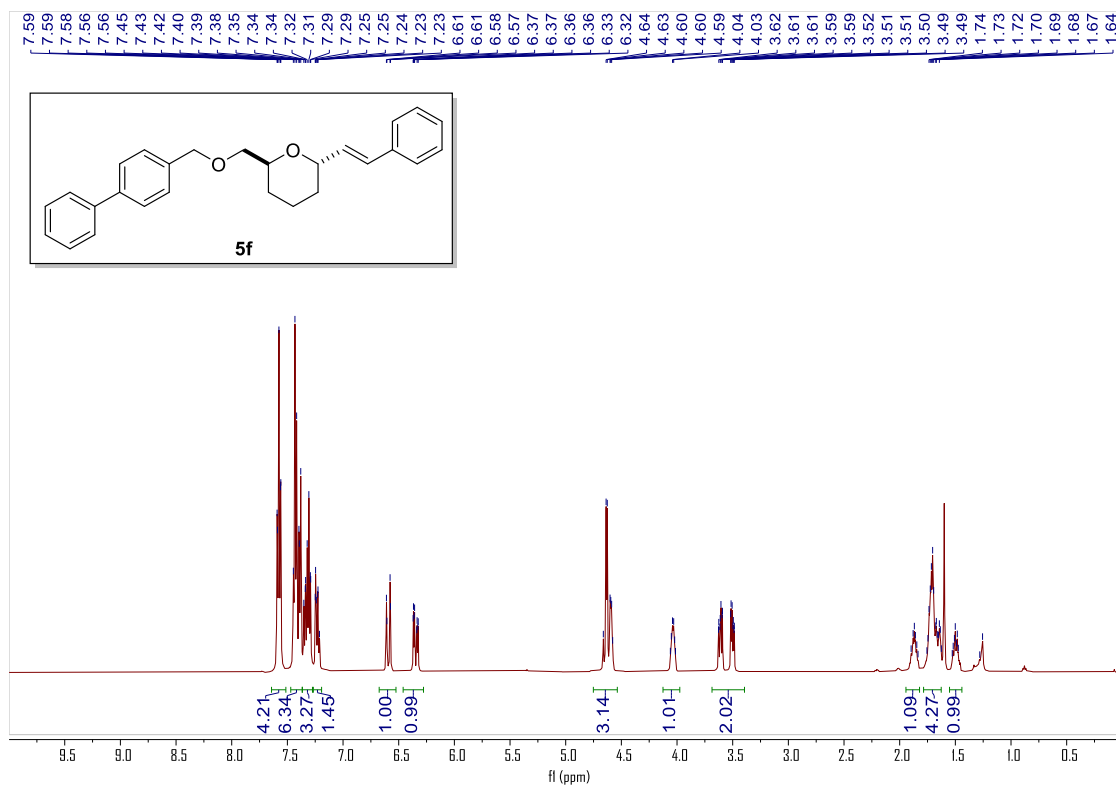

$^{13}\text{C}$  spectrum (126 MHz,  $\text{CDCl}_3$ )

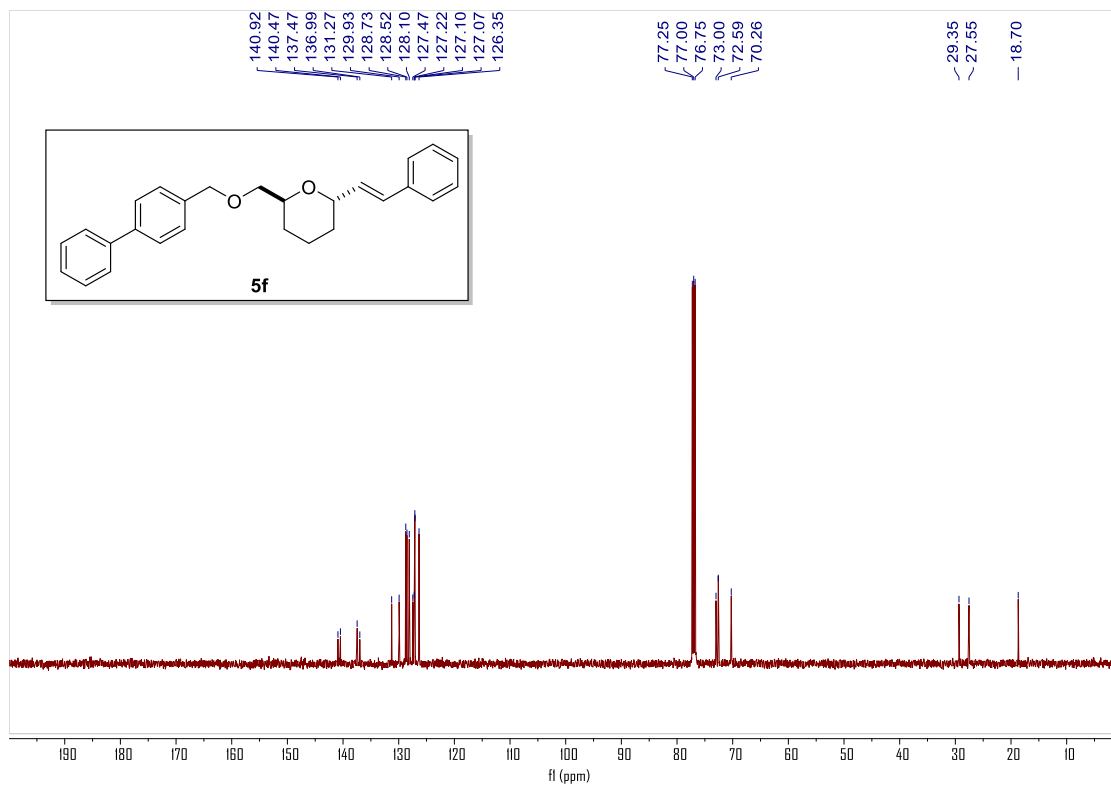

# (E)-2-(((2-methylbenzyl)oxy)methyl)-6-styryltetrahydro-2H-pyran (**5g**)

$^1\text{H}$  spectrum (500 MHz,  $\text{CDCl}_3$ )

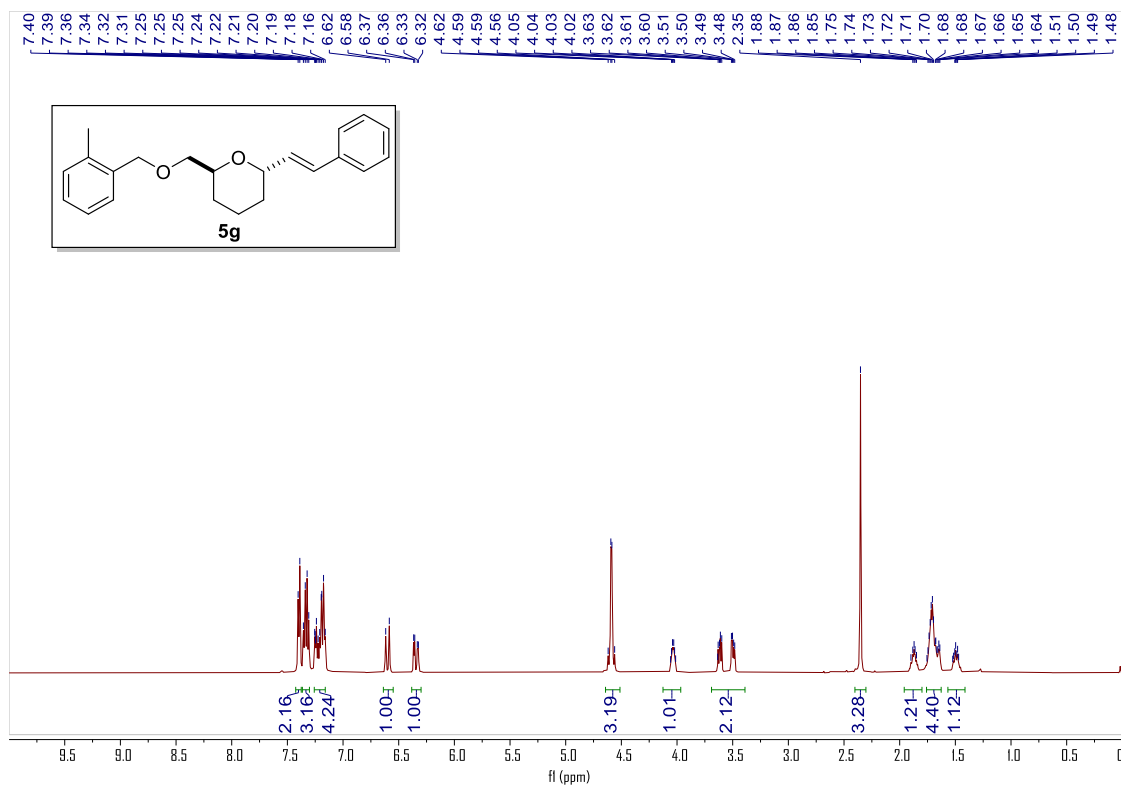

$^{13}\text{C}$  spectrum (126 MHz,  $\text{CDCl}_3$ )

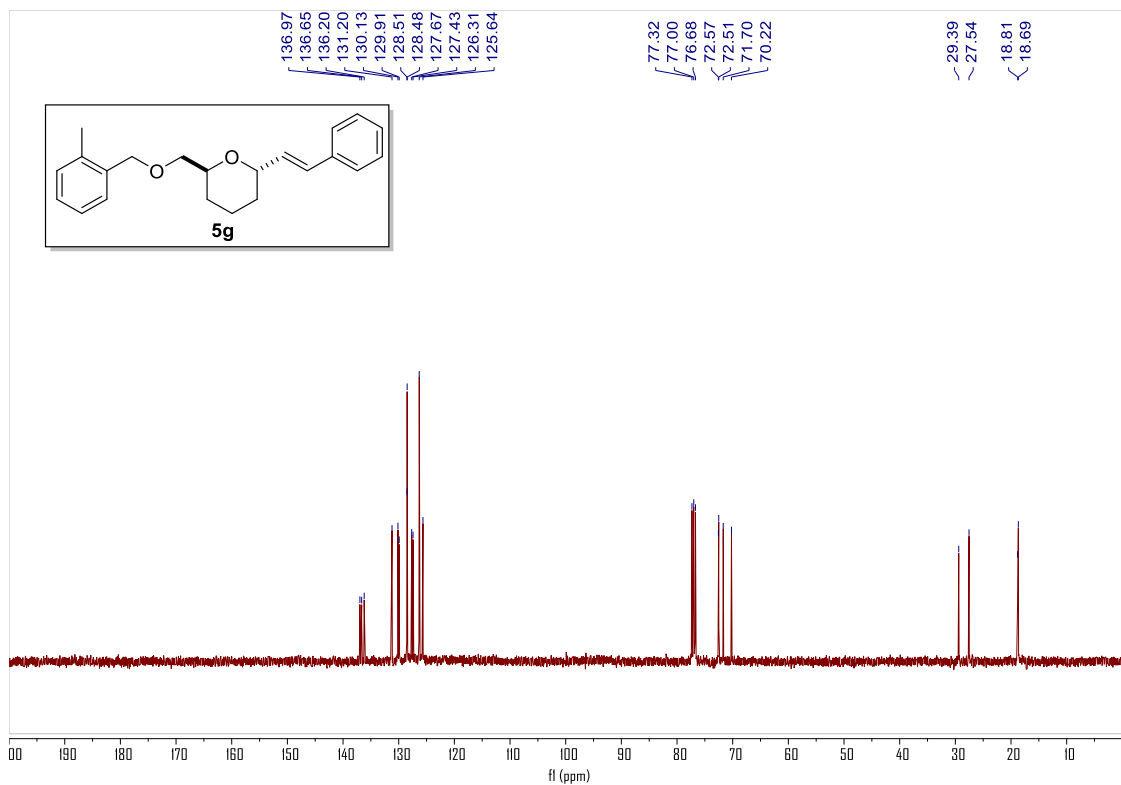

### (E)-2-(((3-methylbenzyl)oxy)methyl)-6-styryltetrahydro-2H-pyran (**5h**)

$^1\text{H}$  spectrum (500 MHz,  $\text{CDCl}_3$ )

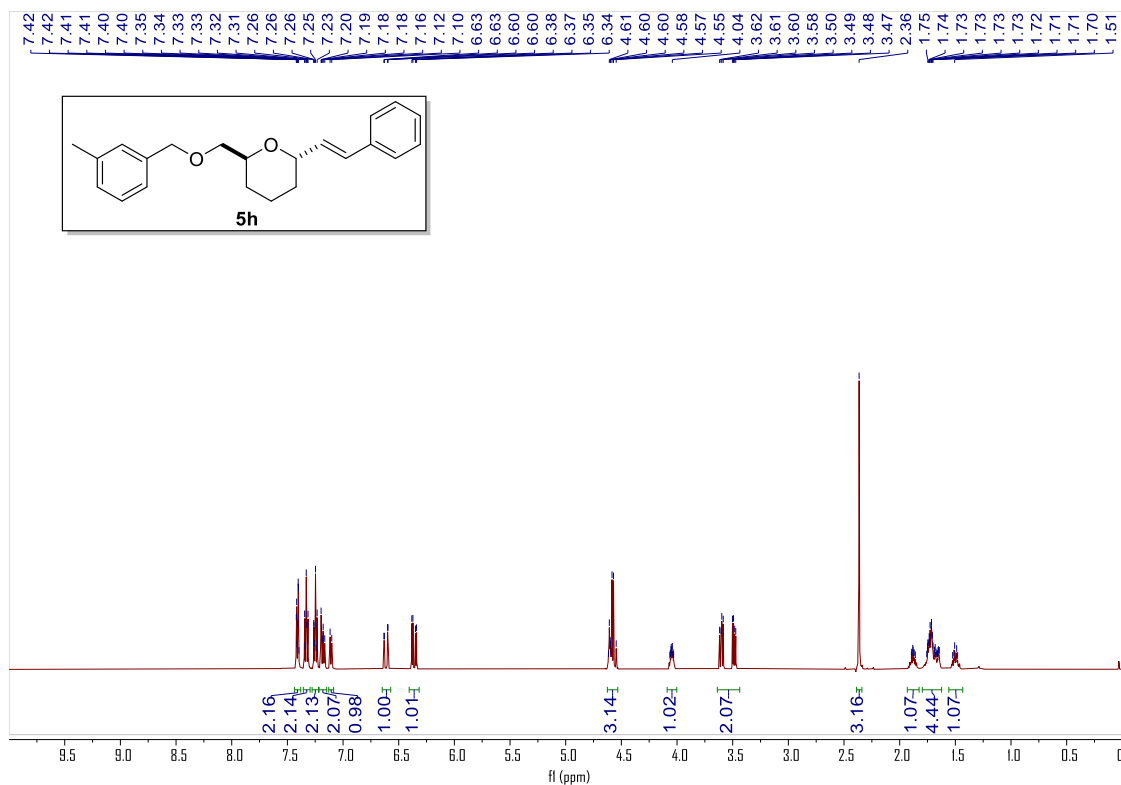

$^{13}\text{C}$  spectrum (126 MHz,  $\text{CDCl}_3$ )

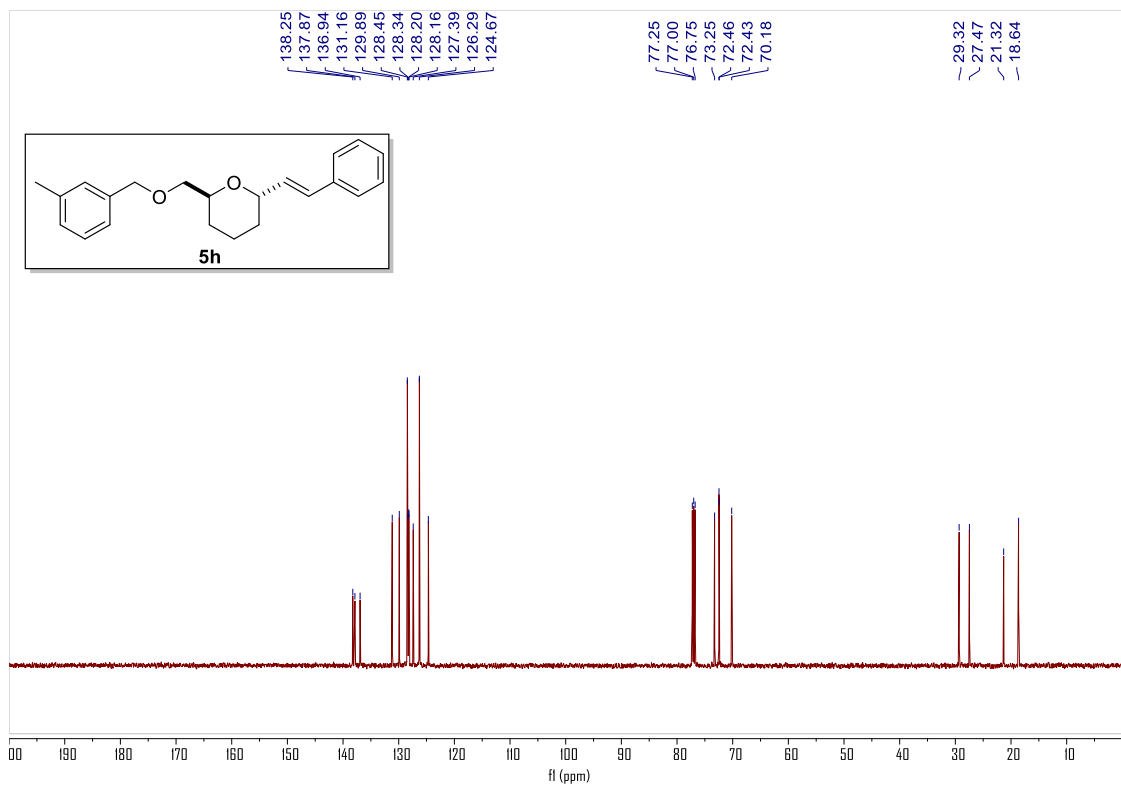

**(E)-2-(((3,5-dimethylbenzyl)oxy)methyl)-6-styryltetrahydro-2H-pyran (5i)**

<sup>1</sup>H spectrum (500 MHz, CDCl<sub>3</sub>)

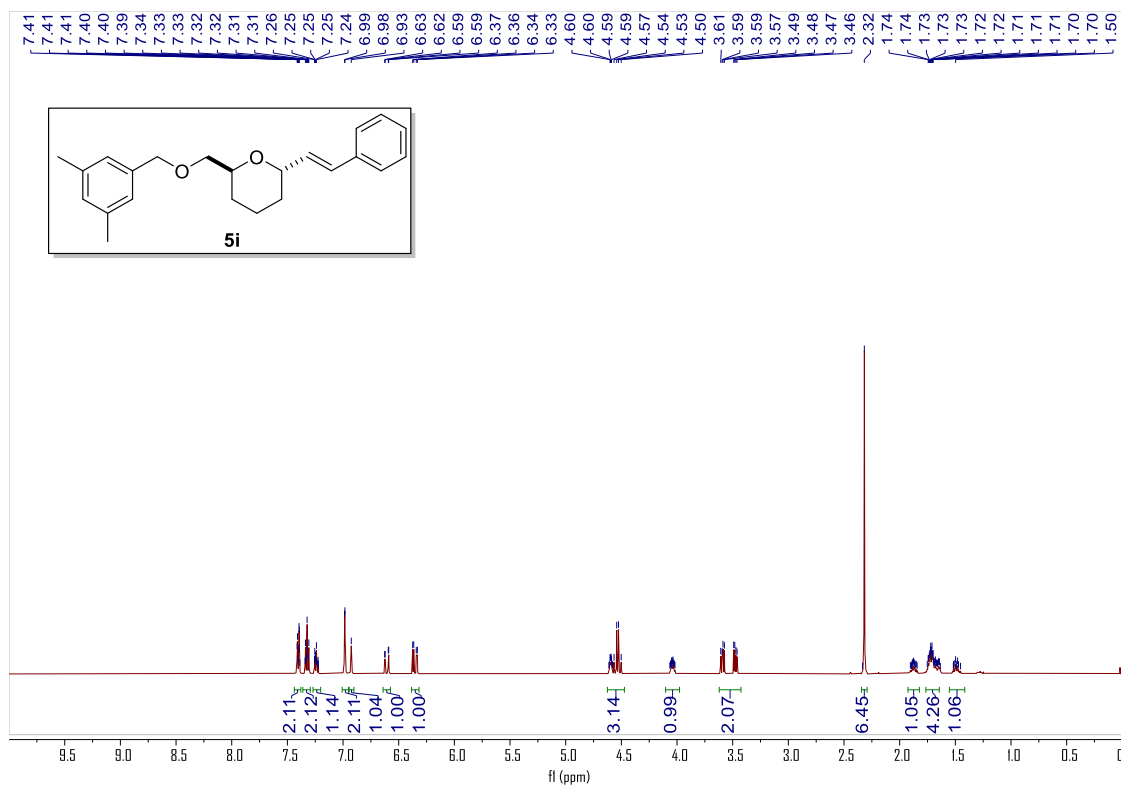

<sup>13</sup>C spectrum (126 MHz, CDCl<sub>3</sub>)

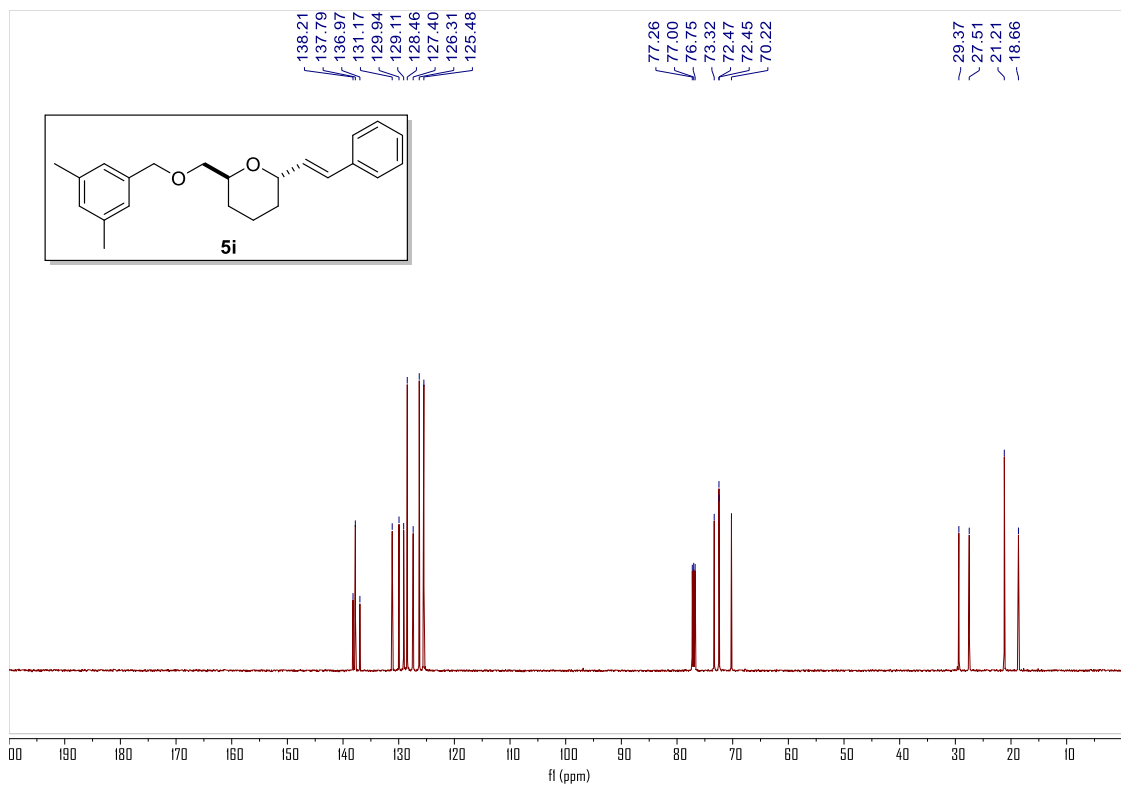

# (E)-tert-butyl diphenyl((6-styryltetrahydro-2H-pyran-2-yl)methoxy)silane (5j)

<sup>1</sup>H spectrum (500 MHz, CDCl<sub>3</sub>)

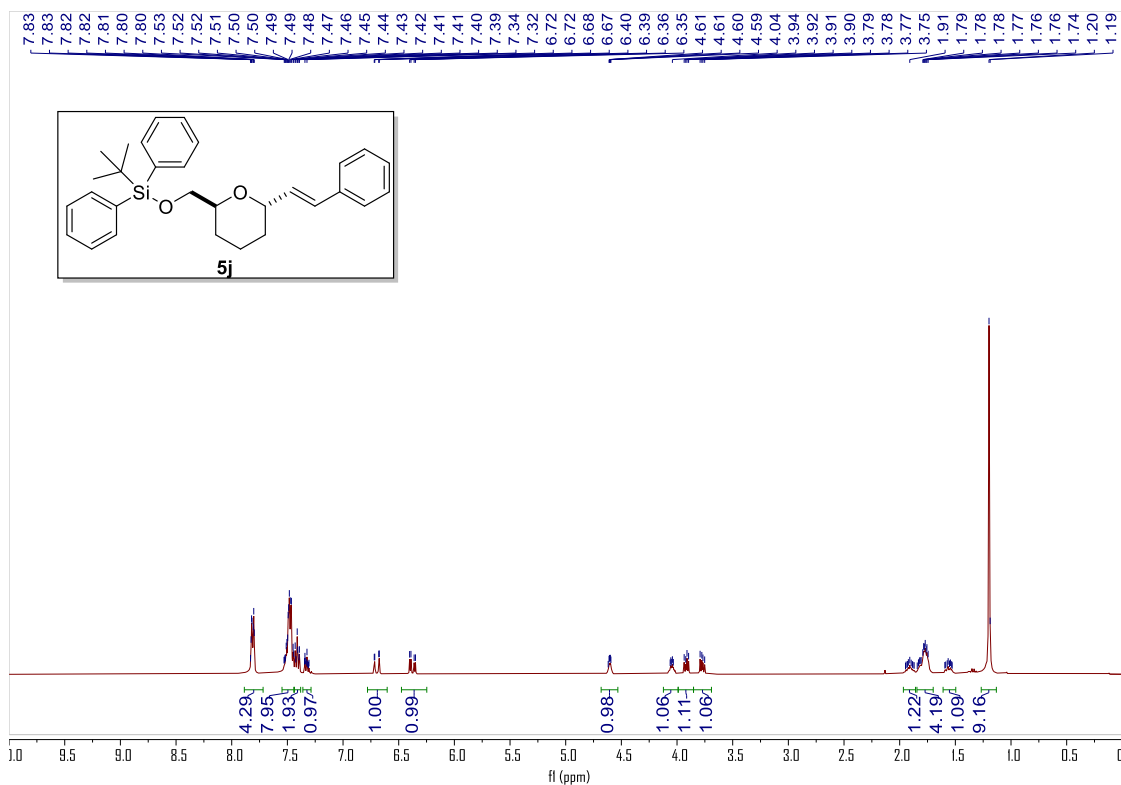

<sup>13</sup>C spectrum (126 MHz, CDCl<sub>3</sub>)

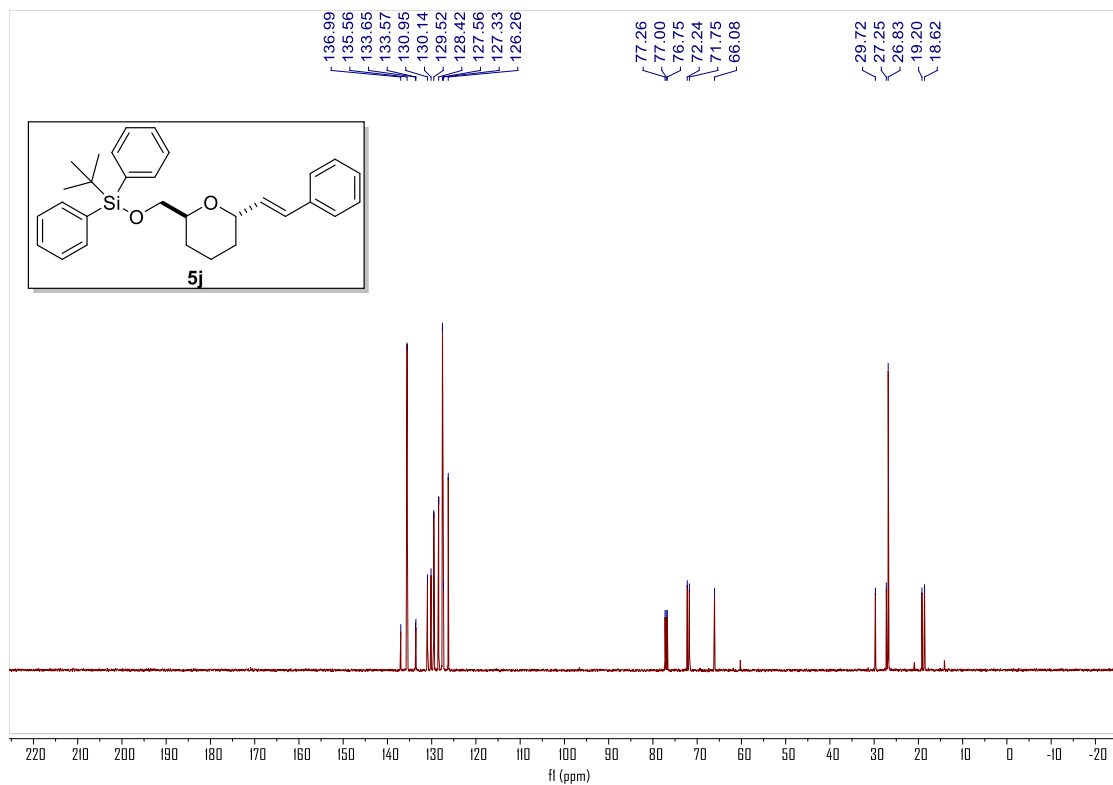

### (E)-(6-styryltetrahydro-2H-pyran-2-yl)methyl acetate (5k)

<sup>1</sup>H spectrum (500 MHz, CDCl<sub>3</sub>)

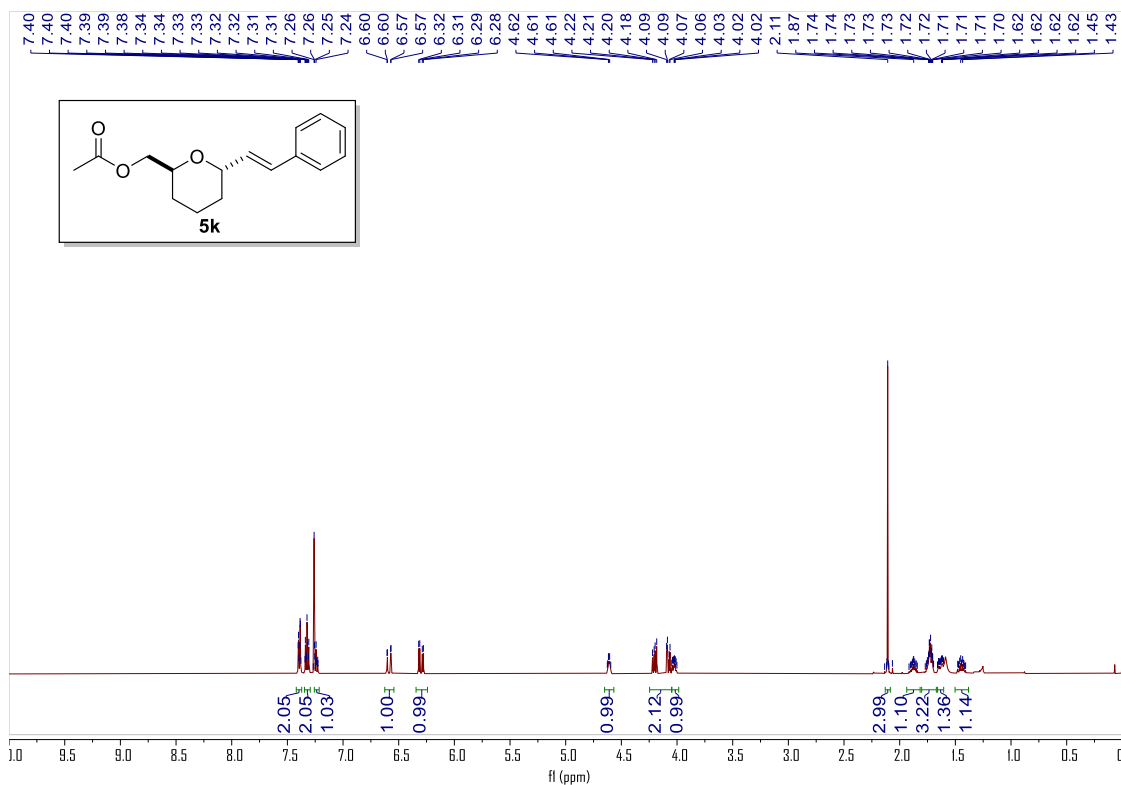

<sup>13</sup>C spectrum (126 MHz, CDCl<sub>3</sub>)

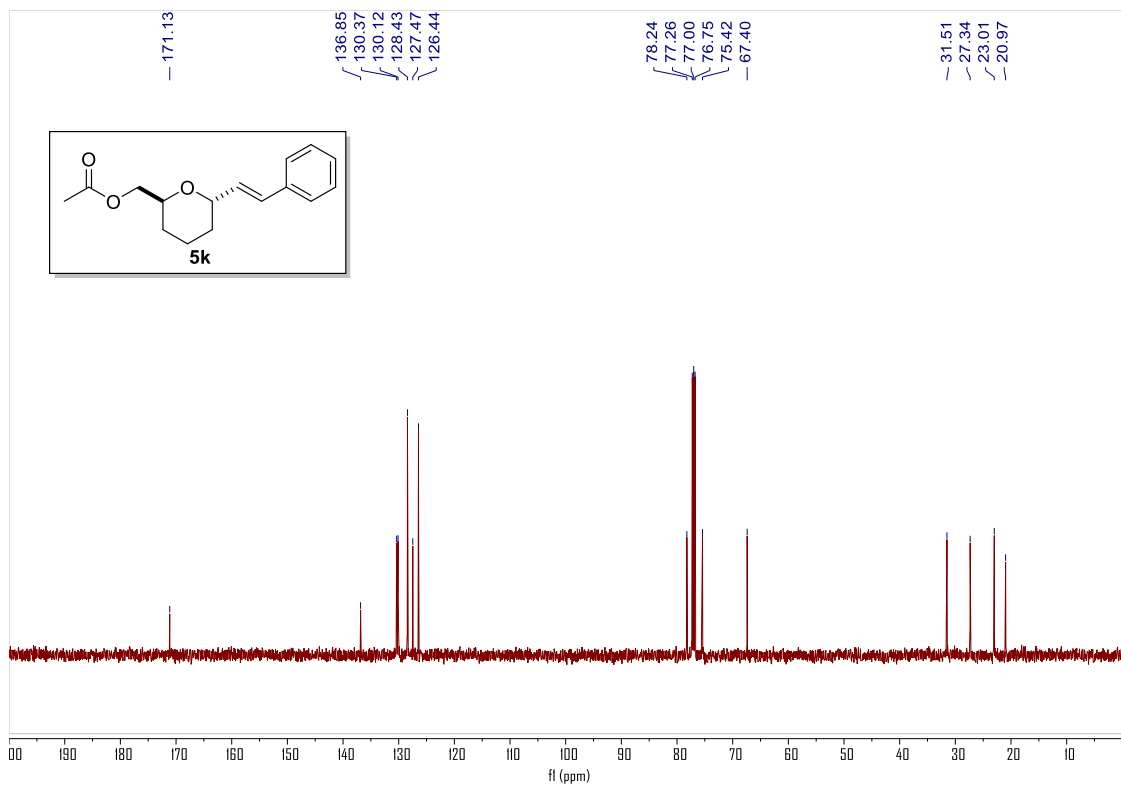

# (E)-(6-styryltetrahydro-2H-pyran-2-yl)methyl pivalate (5I)

<sup>1</sup>H spectrum (500 MHz, CDCl<sub>3</sub>)

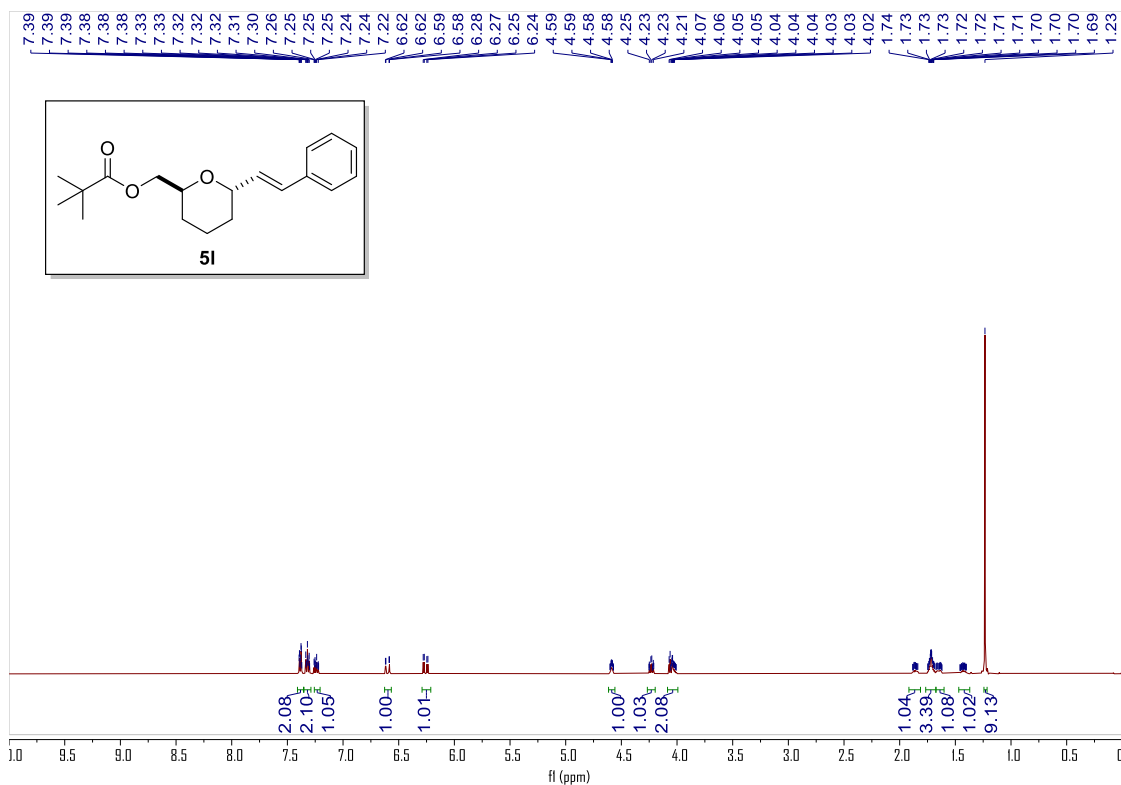

<sup>13</sup>C spectrum (126 MHz, CDCl<sub>3</sub>)

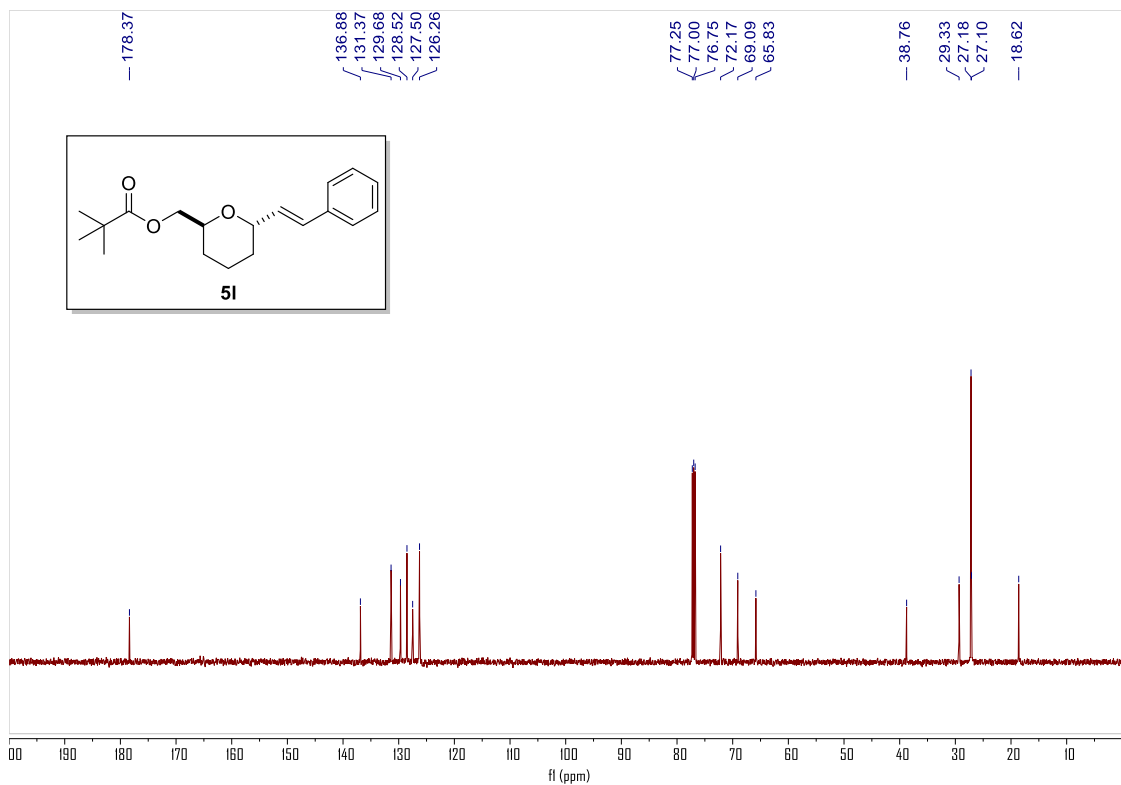



**(E)-(6-styryltetrahydro-2H-pyran-2-yl)methyl 3-(furan-2-yl)propanoate (5m)**

<sup>1</sup>H spectrum (500 MHz, CDCl<sub>3</sub>)

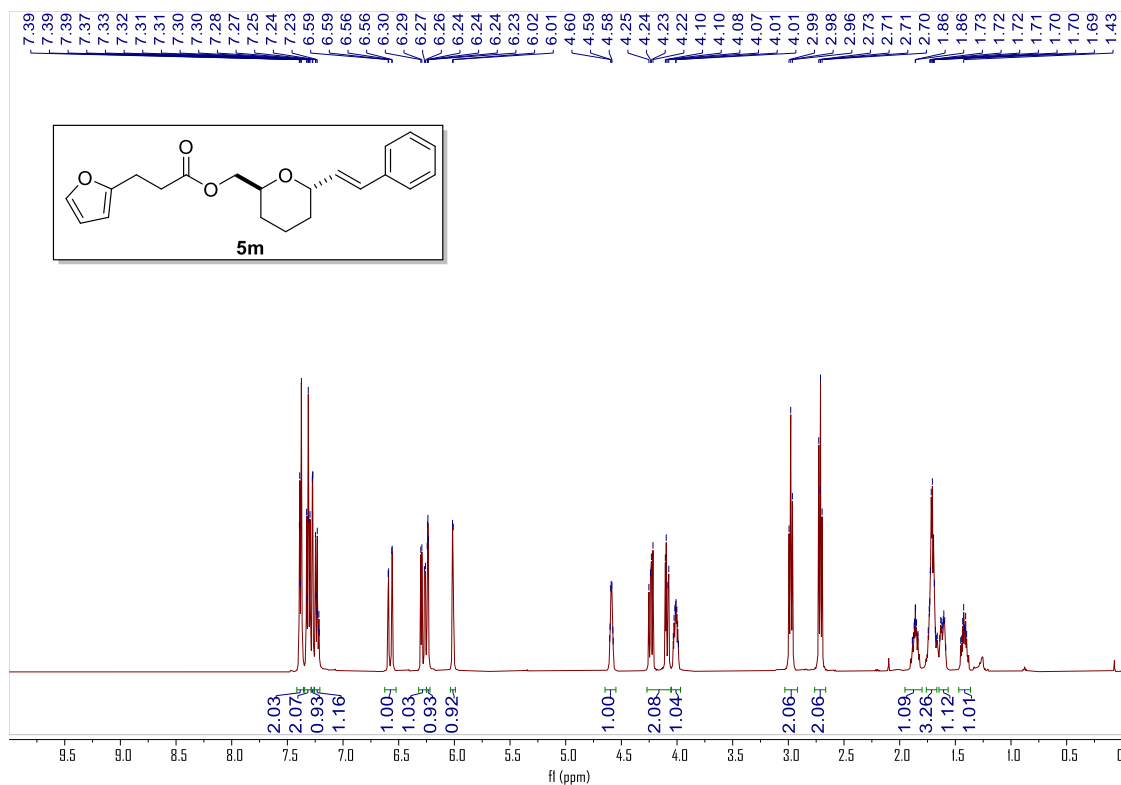

<sup>13</sup>C spectrum (126 MHz, CDCl<sub>3</sub>)

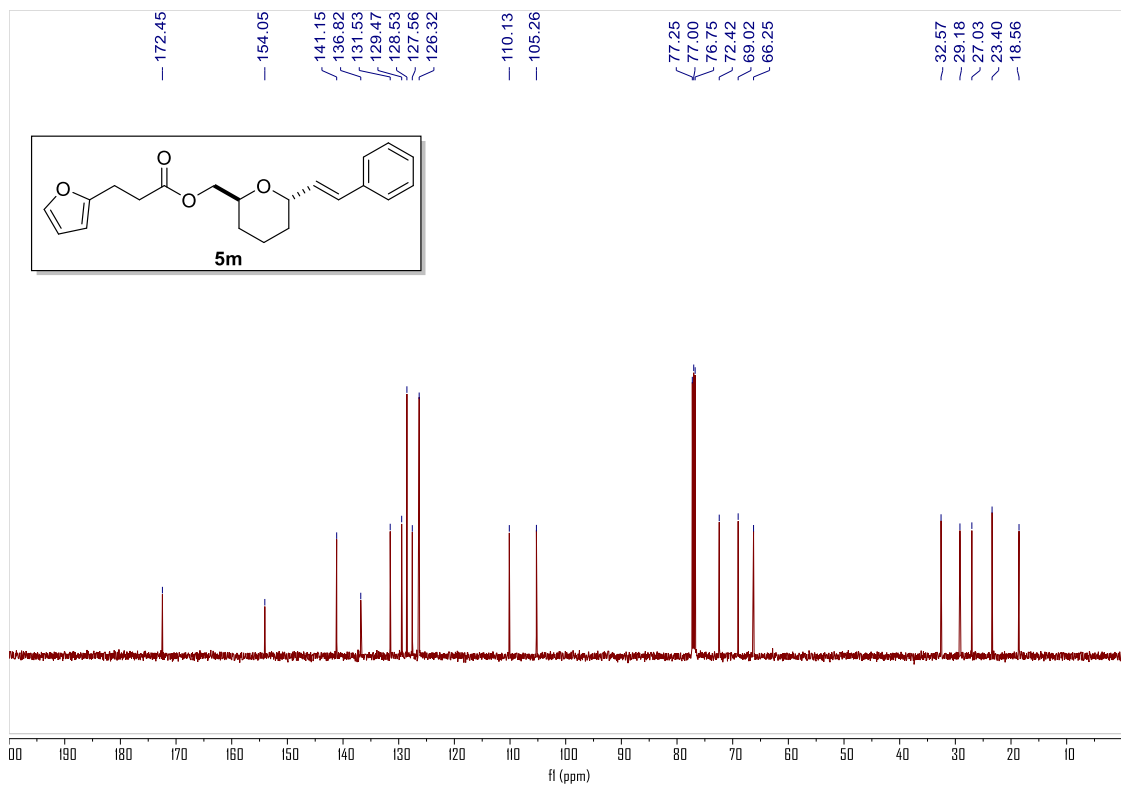

# (E)-(6-styryltetrahydro-2H-pyran-2-yl)methyl 6-bromo-2-naphthoate (5n)

$^1\text{H}$  spectrum (500 MHz,  $\text{CDCl}_3$ )

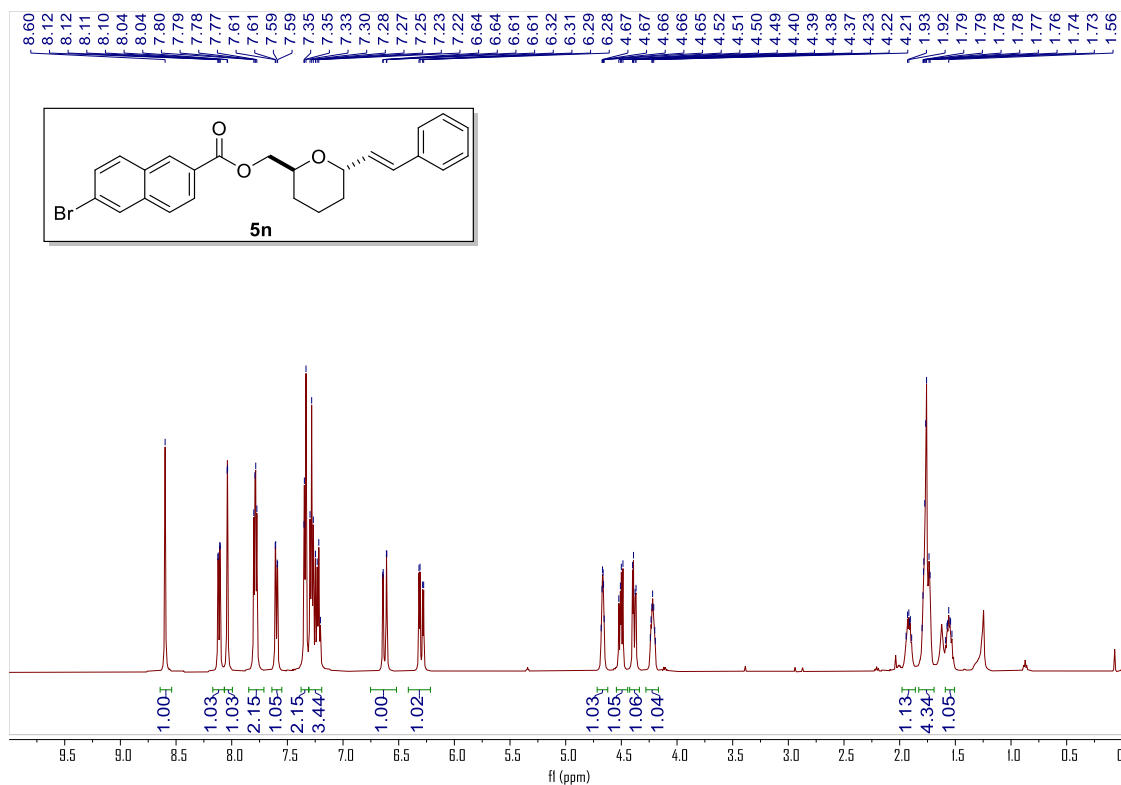

$^{13}\text{C}$  spectrum (126 MHz,  $\text{CDCl}_3$ )

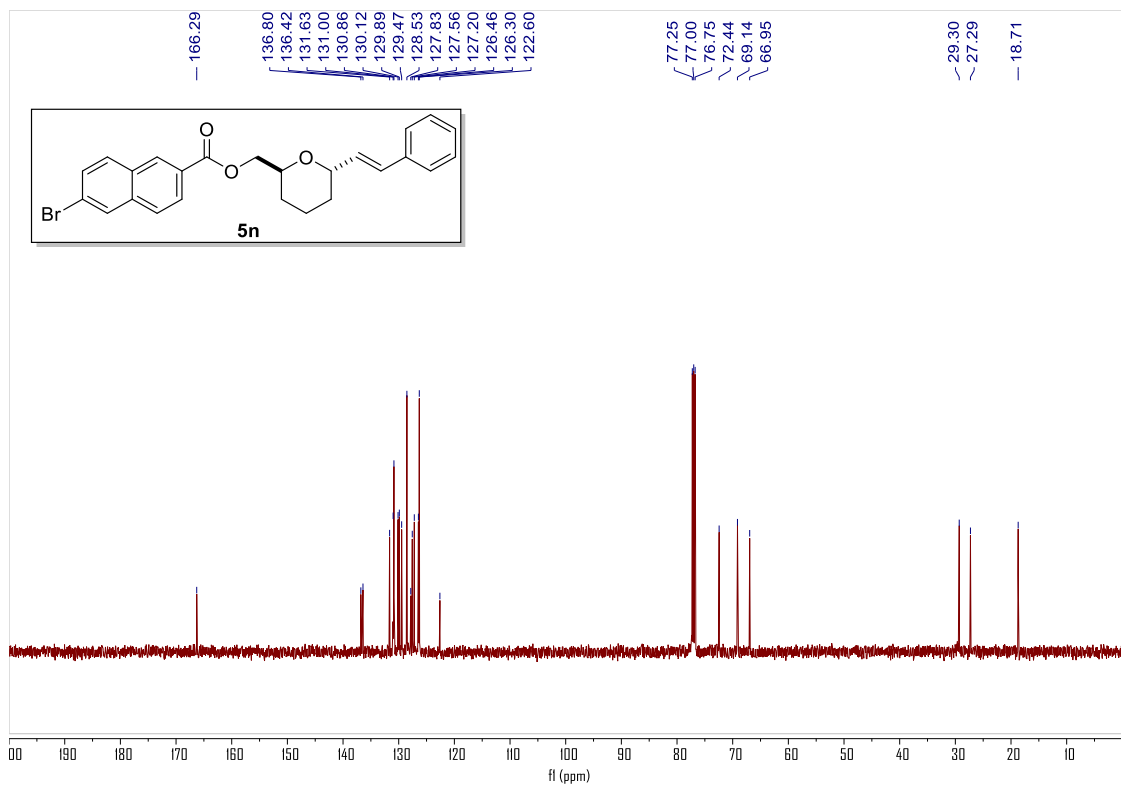

# (E)-(6-styryltetrahydro-2H-pyran-2-yl)methyl cyclobutanecarboxylate (**5o**)

$^1\text{H}$  spectrum (500 MHz,  $\text{CDCl}_3$ )

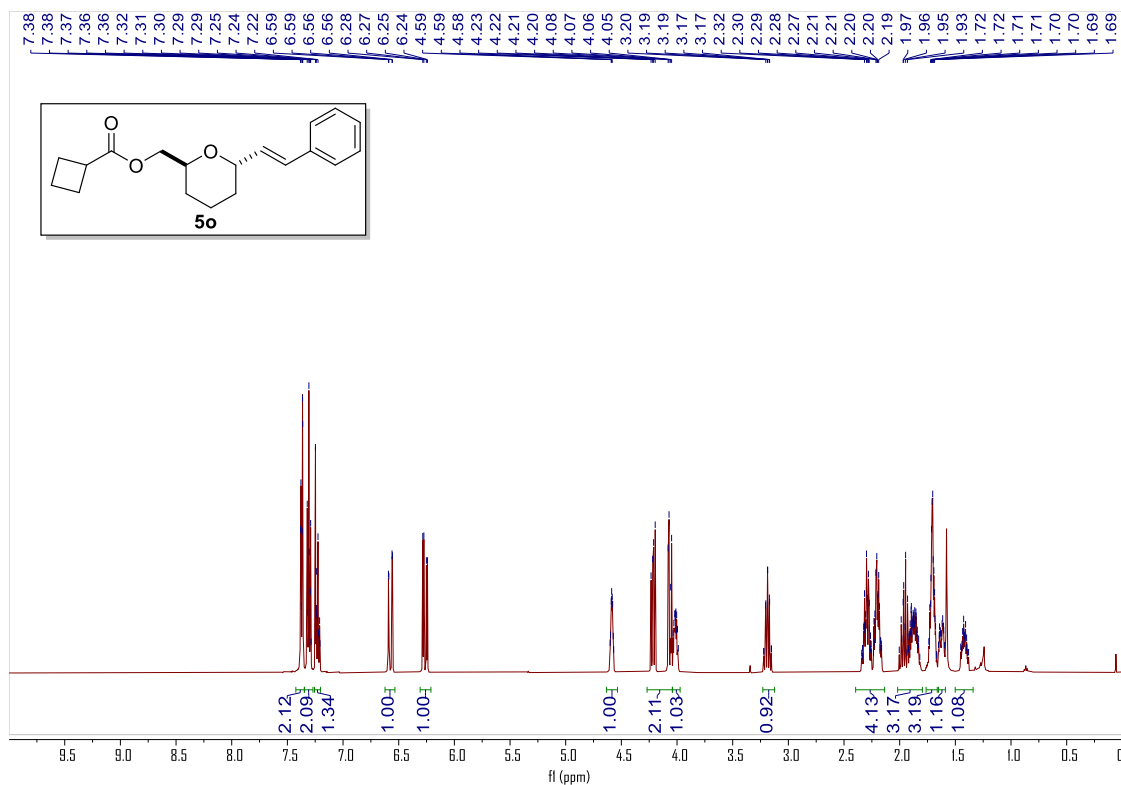

$^{13}\text{C}$  spectrum (126 MHz,  $\text{CDCl}_3$ )

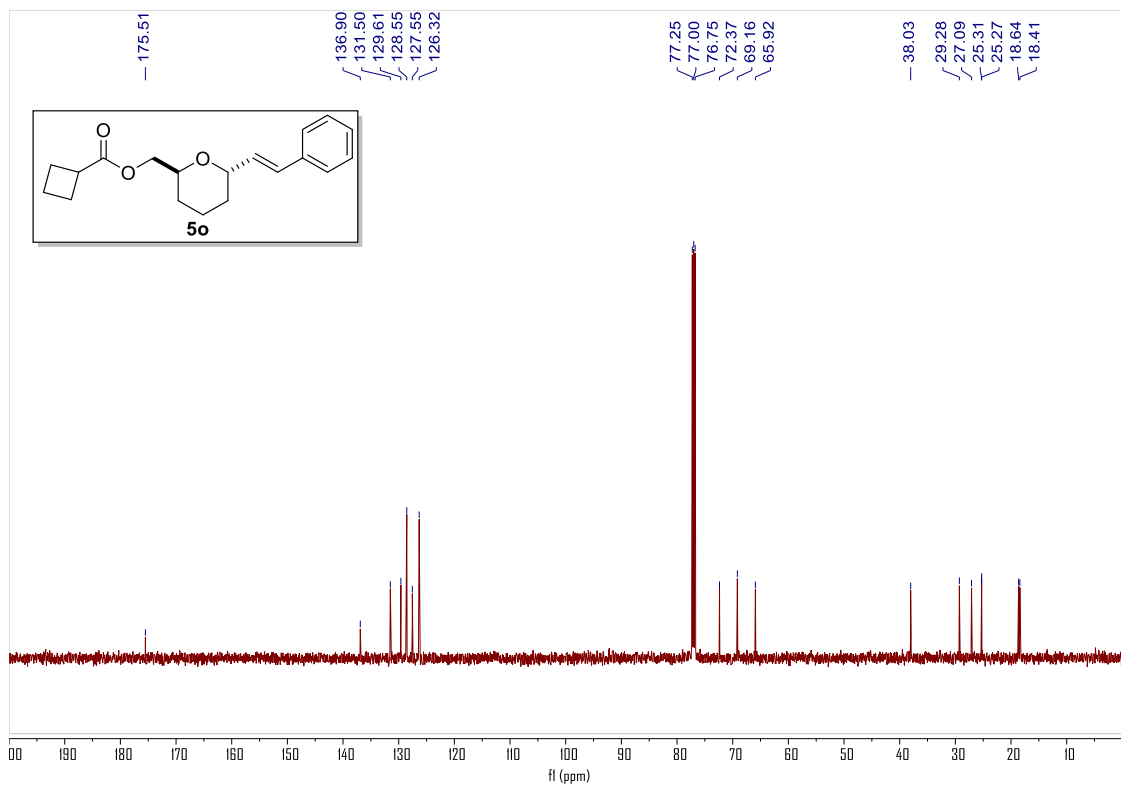

# (E)-6-styryltetrahydro-2H-pyran-2-carbaldehyde (5p)

<sup>1</sup>H spectrum (400 MHz, CDCl<sub>3</sub>)

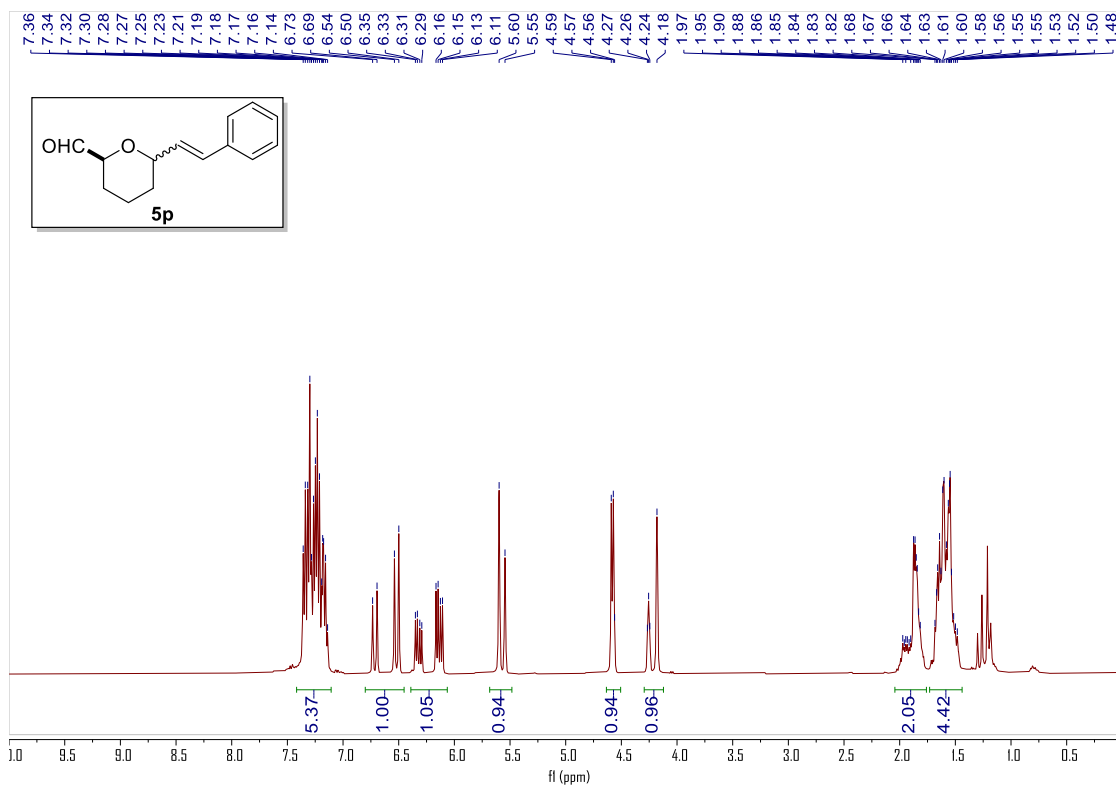

<sup>13</sup>C spectrum (101 MHz, CDCl<sub>3</sub>)

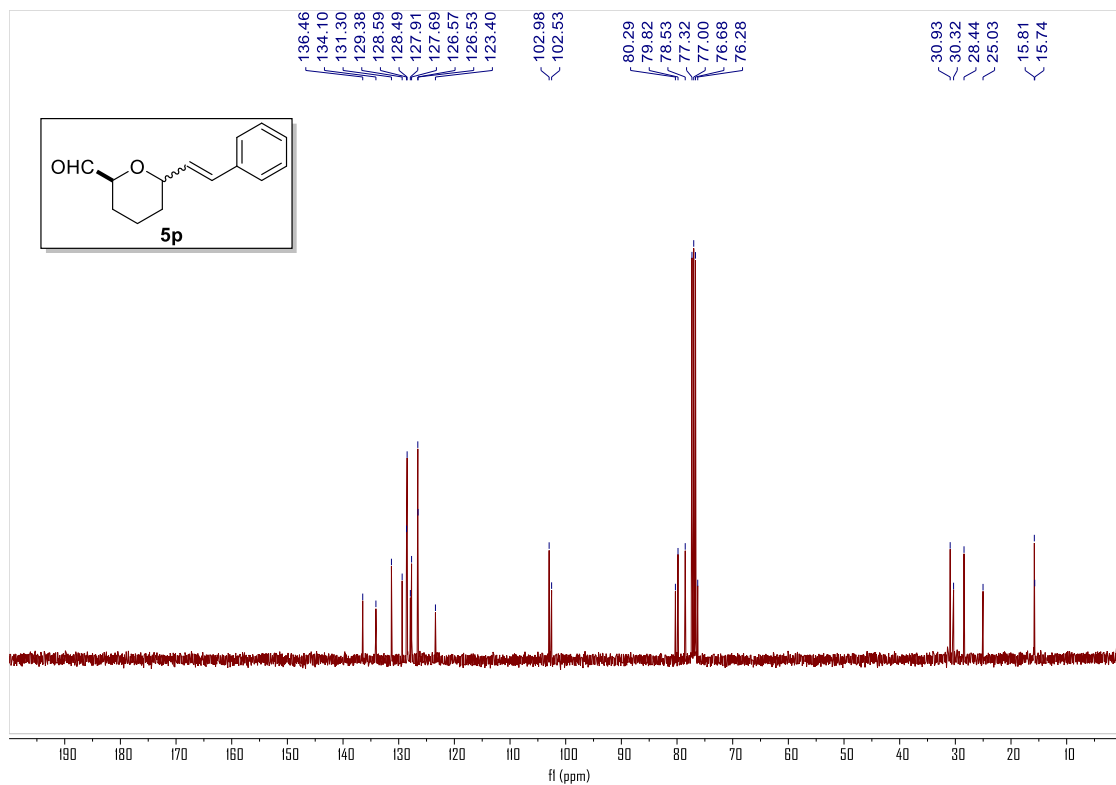

**(8R,9S,13S,14S)-13-methyl-3-(((E)-styryl)tetrahydro-2H-pyran-2-yl)methoxy)-6,7,8,9,11,12,13,14,15,16-decahydro-17H-cyclopenta[a]phenanthren-17-one (5q)**

$^1\text{H}$  spectrum (500 MHz,  $\text{CDCl}_3$ )

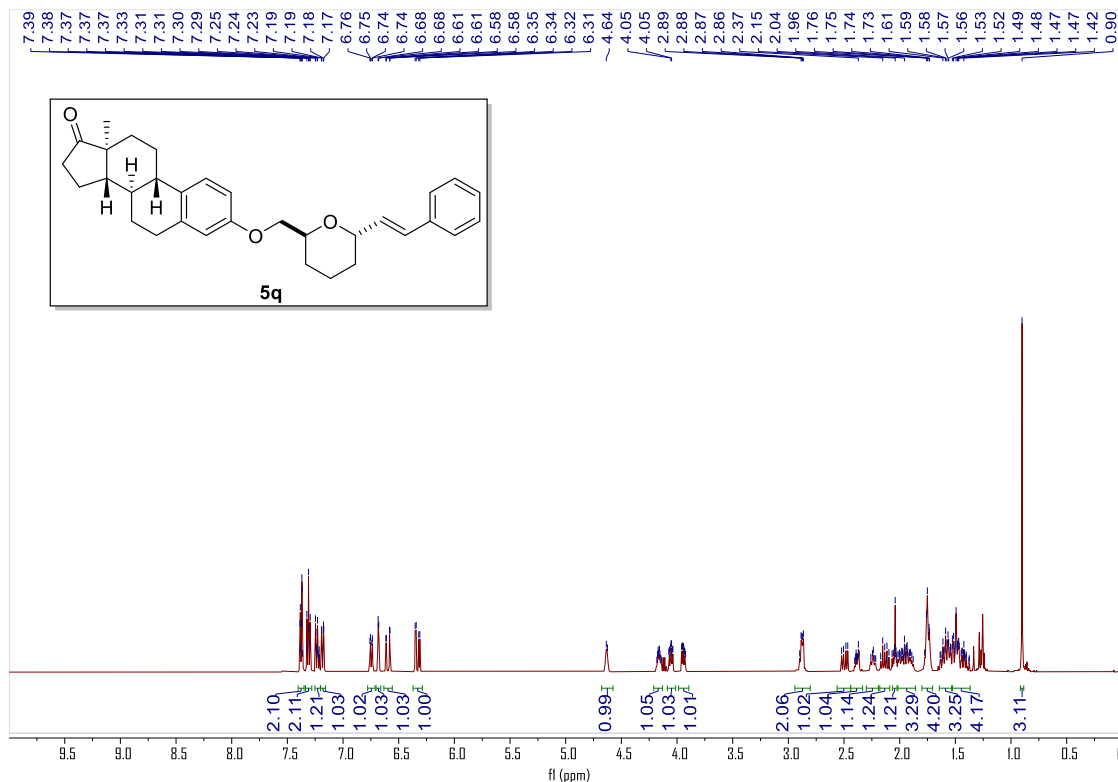

$^{13}\text{C}$  spectrum (126 MHz,  $\text{CDCl}_3$ )

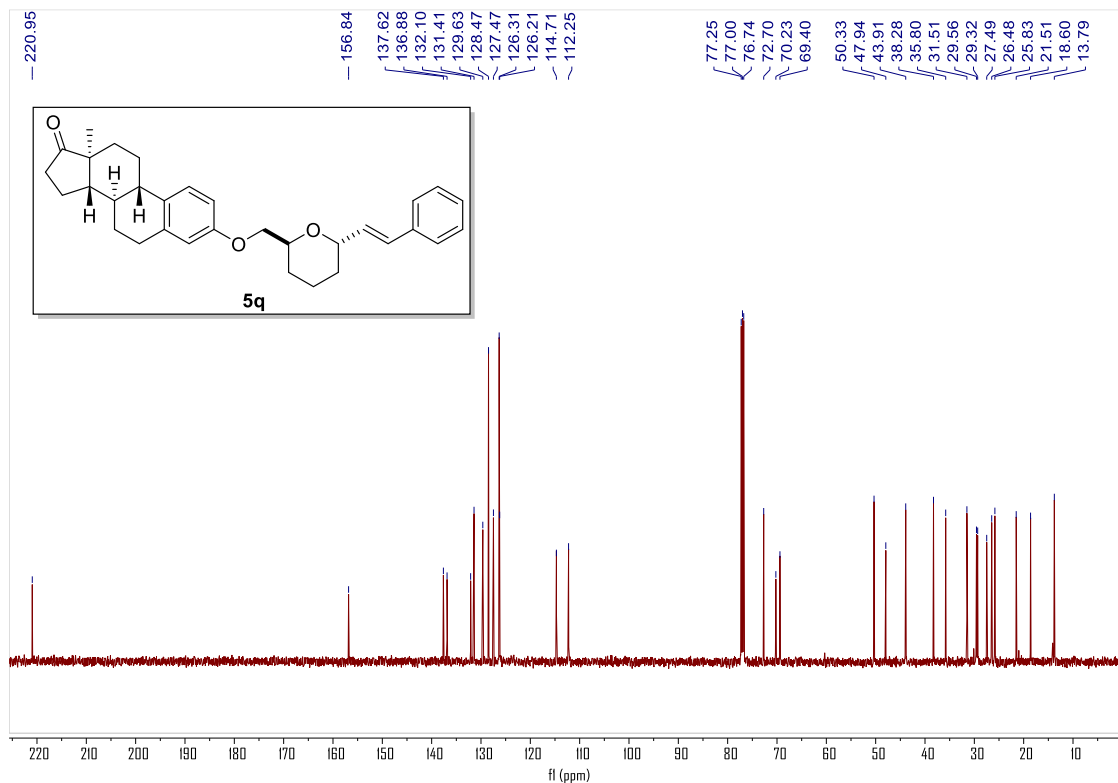

**(E)-(6-styryltetrahydro-2H-pyran-2-yl)methyl 2-(4-isobutylphenyl)propanoate**

**(5r)**

<sup>1</sup>H spectrum (500 MHz, CDCl<sub>3</sub>)

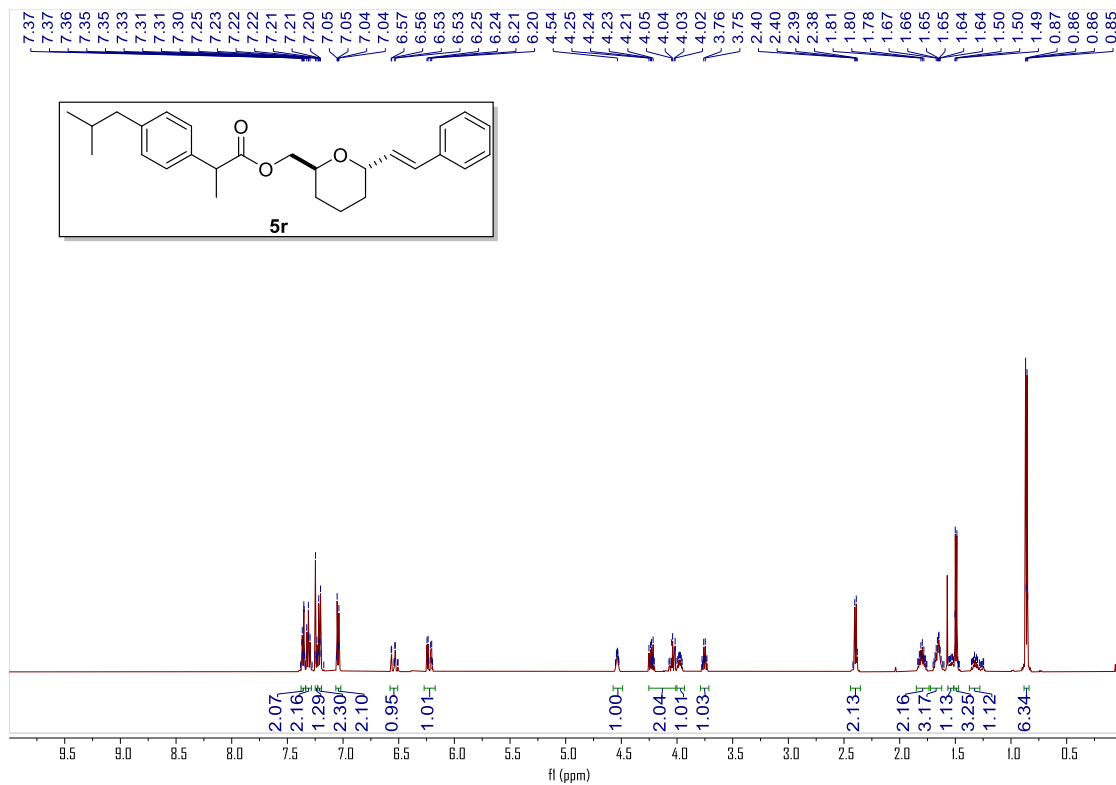

<sup>13</sup>C spectrum (126 MHz, CDCl<sub>3</sub>)

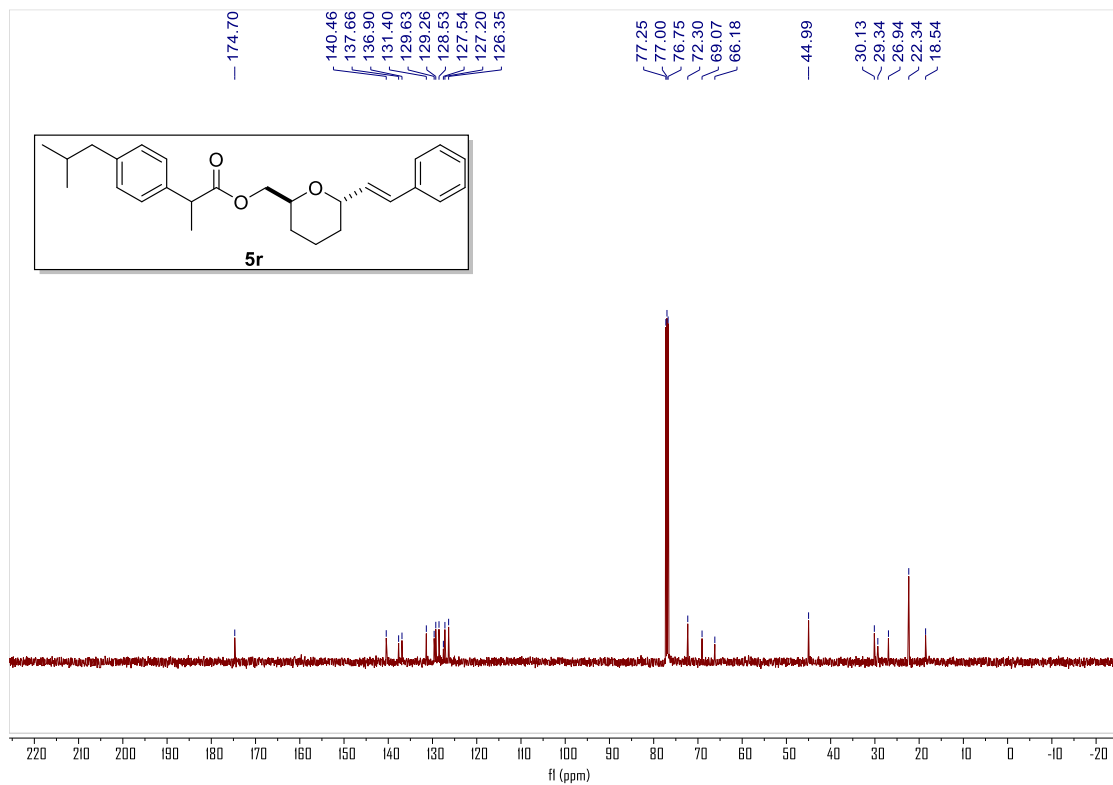

**(E)-(6-styryltetrahydro-2H-pyran-2-yl)methyl 2-(11-oxo-6,11-dihydrodibenzo[b,e]oxepin-3-yl)acetate (5s)**

$^1\text{H}$  spectrum (500 MHz,  $\text{CDCl}_3$ )

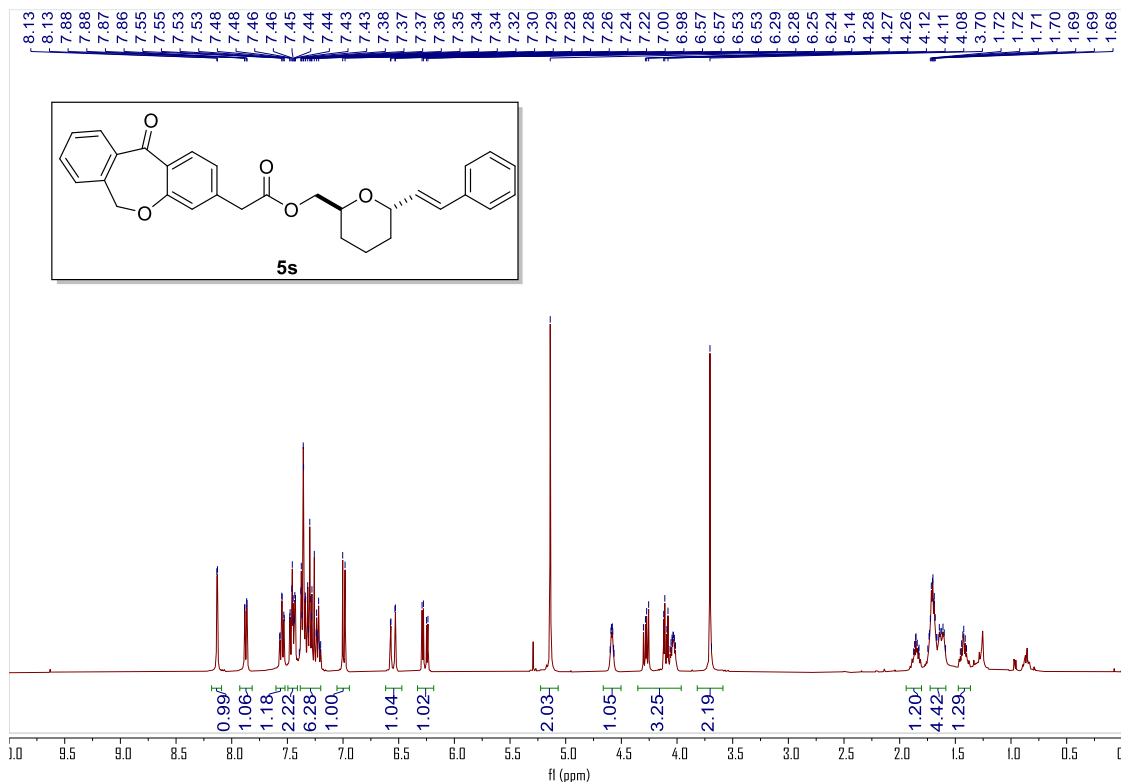

$^{13}\text{C}$  spectrum (126 MHz,  $\text{CDCl}_3$ )

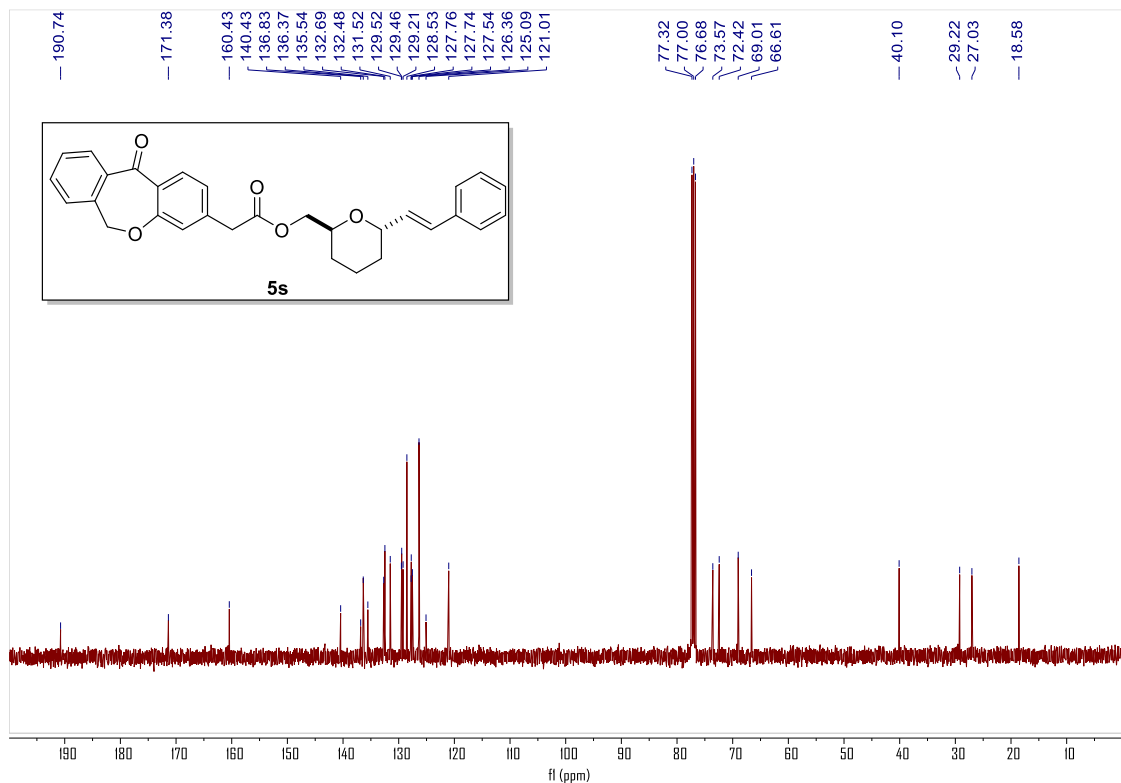

**(E)-2-((benzyloxy)methyl)-6-(hex-1-en-1-yl)tetrahydro-2H-pyran (5t)**

<sup>1</sup>H spectrum (500 MHz, CDCl<sub>3</sub>)

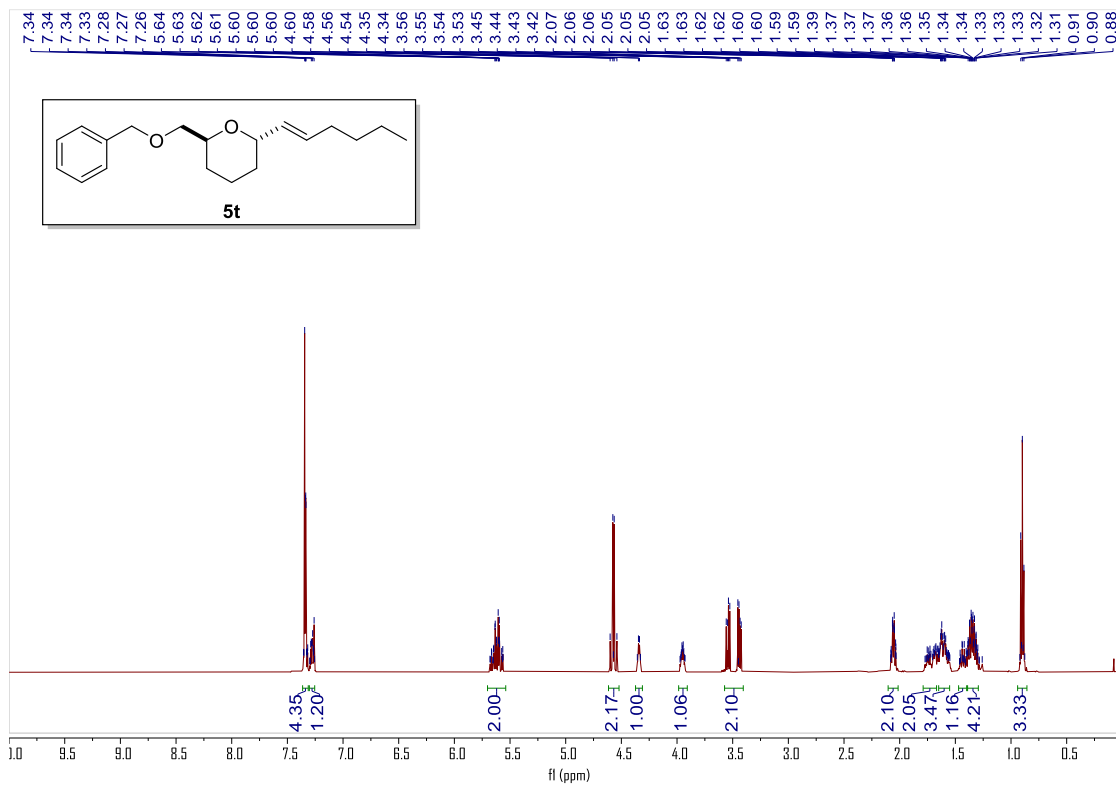

<sup>13</sup>C spectrum (126 MHz, CDCl<sub>3</sub>)

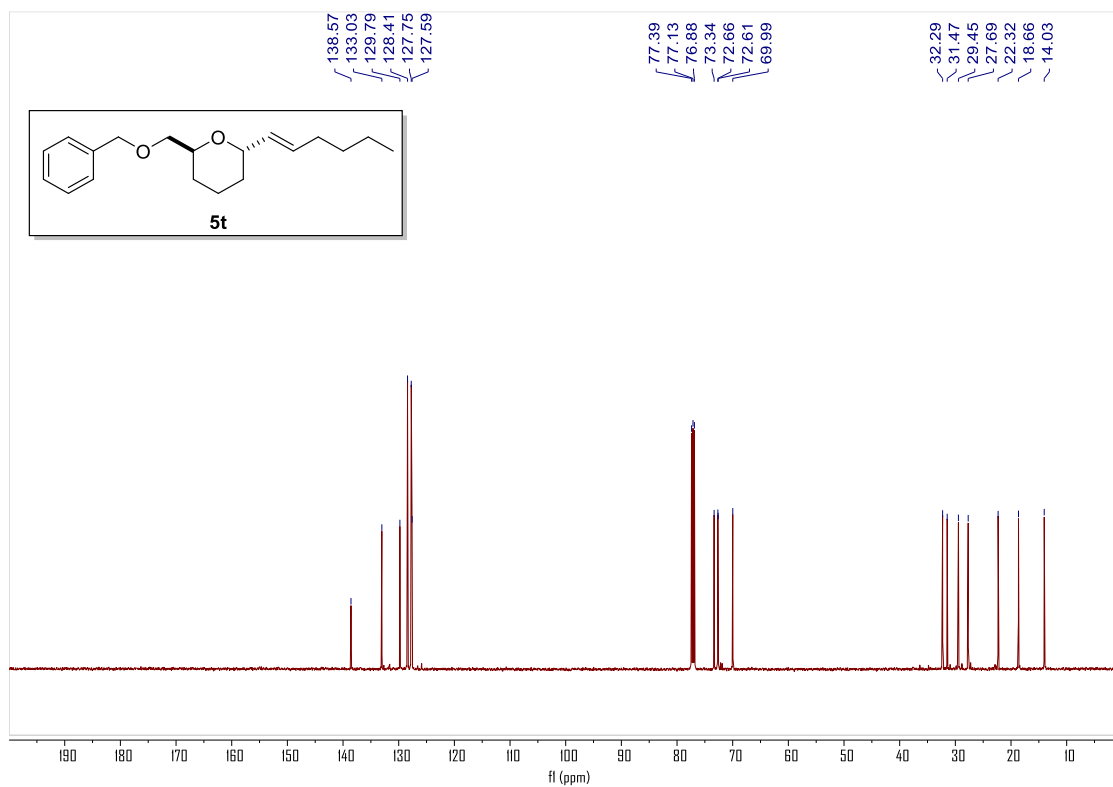





### (E)-2-styryltetrahydrofuran (5a')

<sup>1</sup>H spectrum (500 MHz, CDCl<sub>3</sub>)

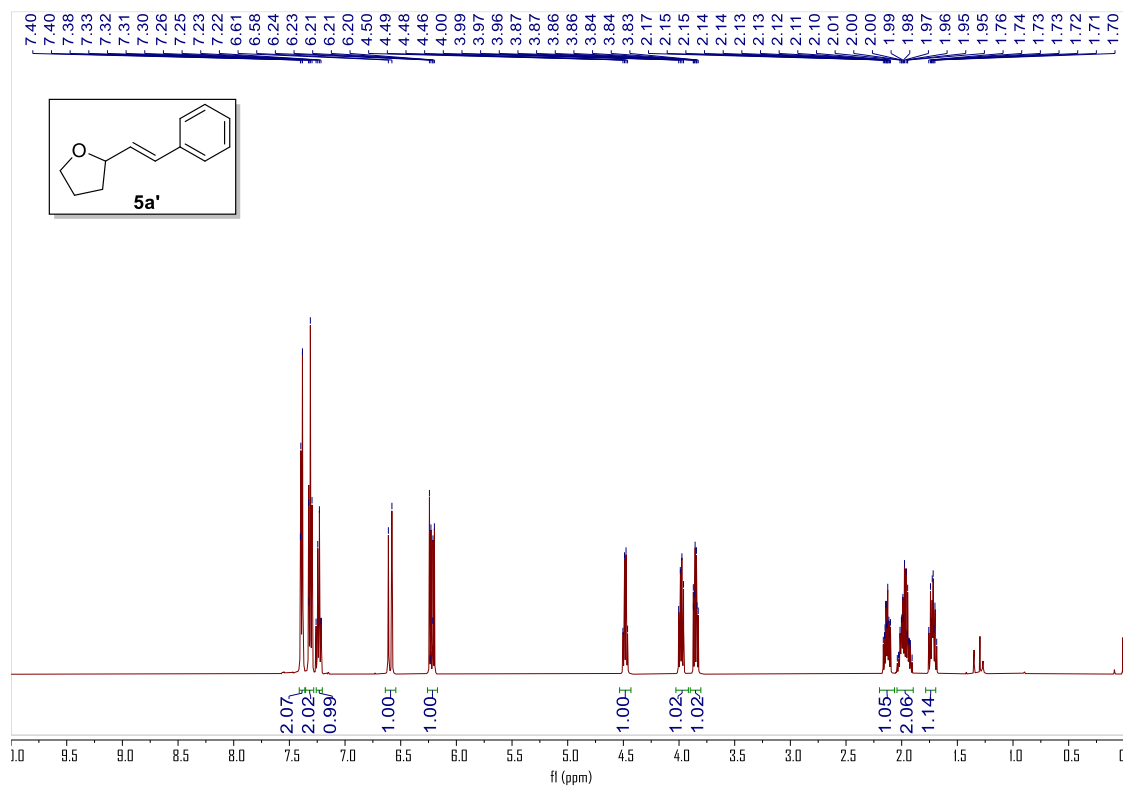

<sup>13</sup>C spectrum (126 MHz, CDCl<sub>3</sub>)

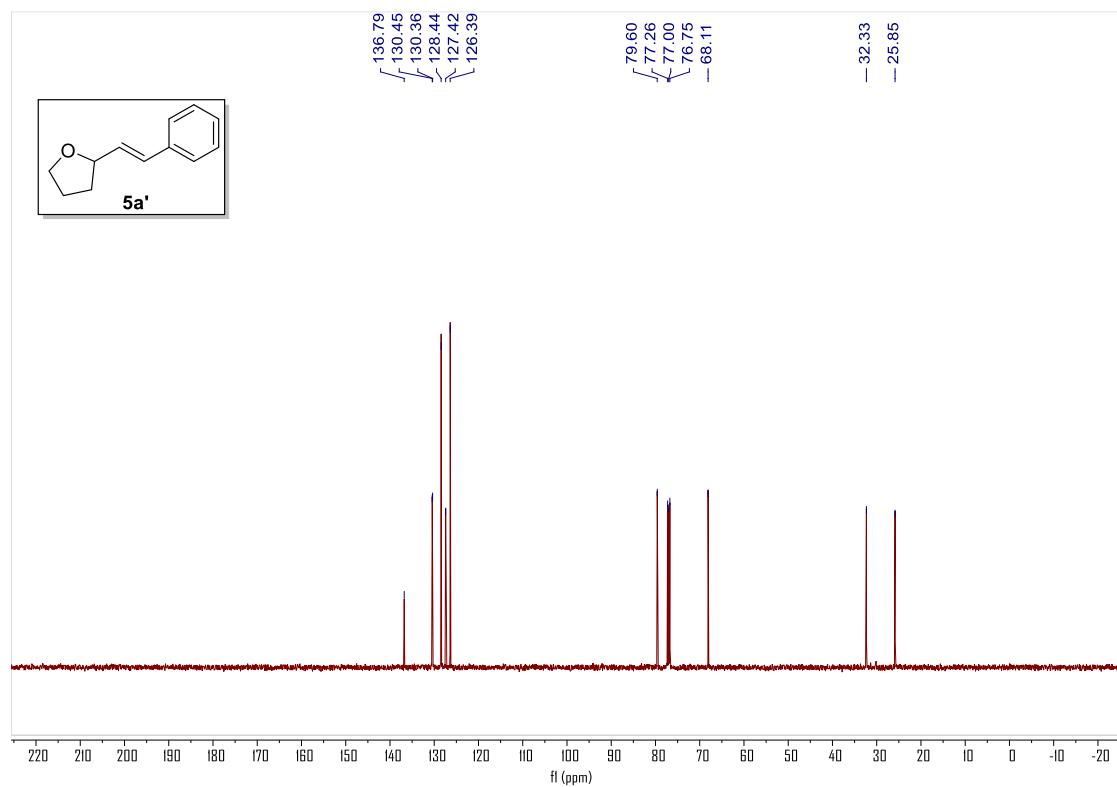

### tert-butyl (E)-2-styrylpyrrolidine-1-carboxylate (**5b'**)

$^1\text{H}$  spectrum (400 MHz,  $\text{CDCl}_3$ )

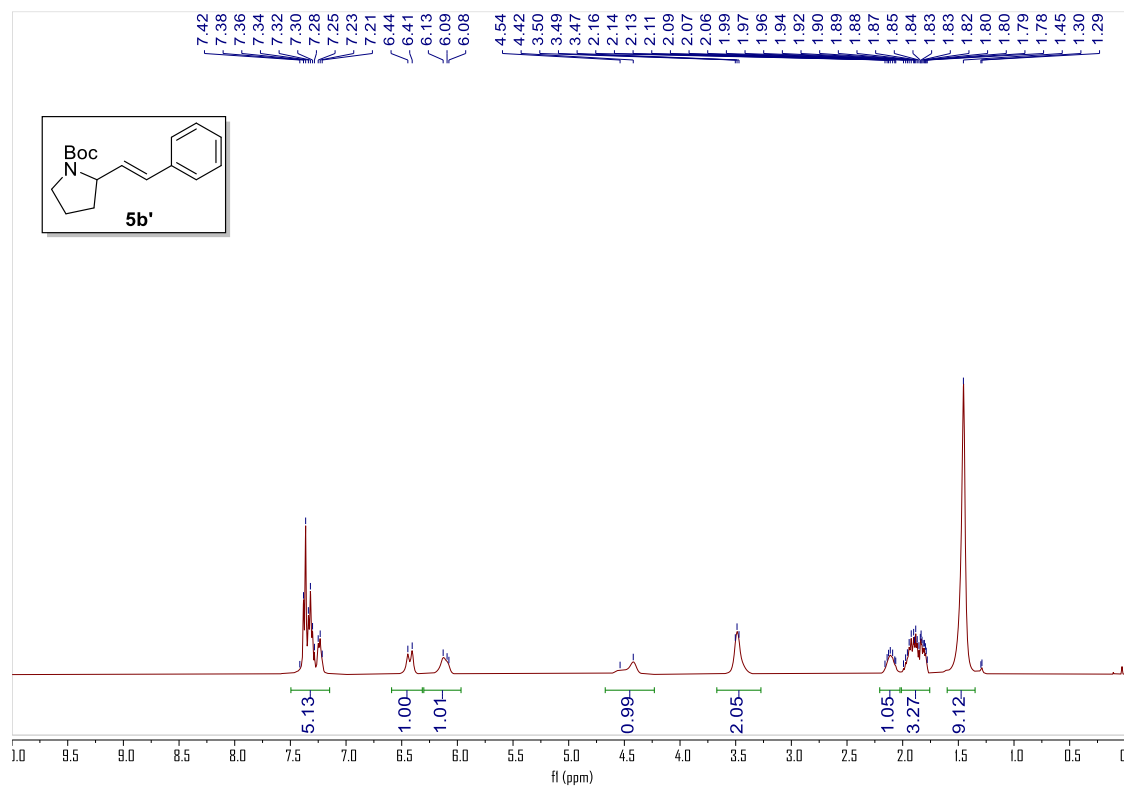

$^{13}\text{C}$  spectrum (101 MHz,  $\text{CDCl}_3$ )

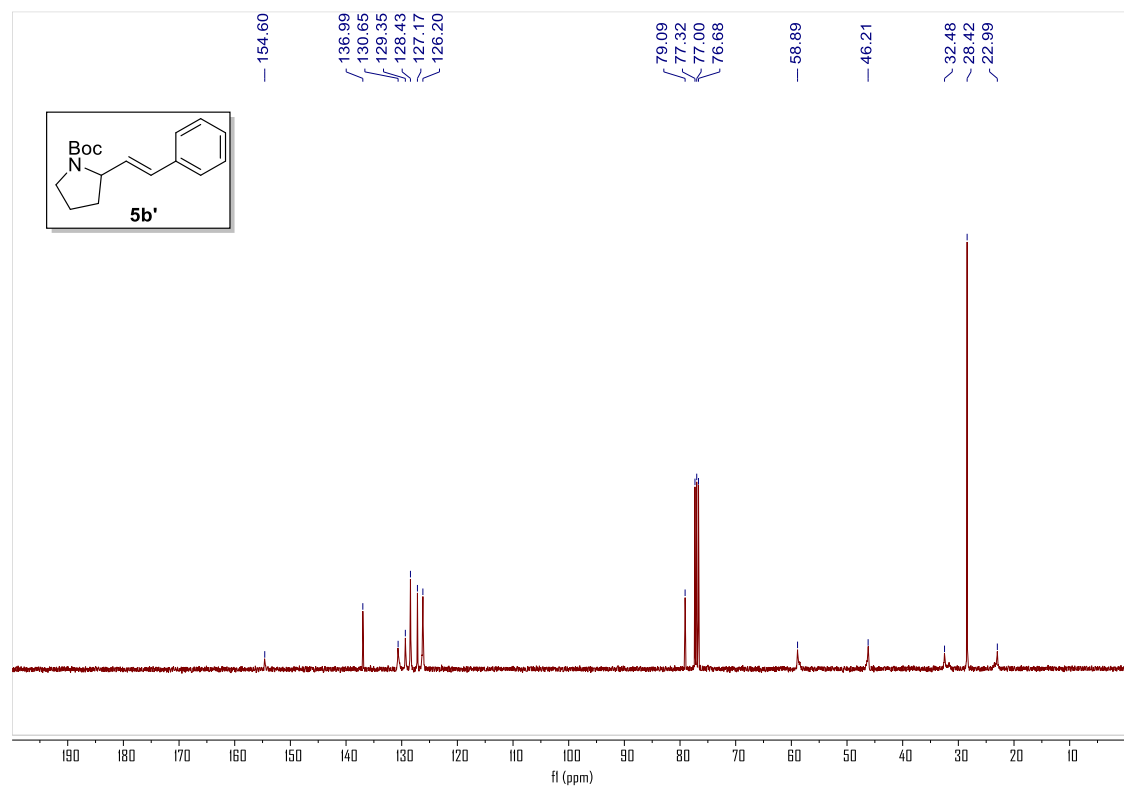

### tert-butyl (E)-2-styrylpiperidine-1-carboxylate (5c')

<sup>1</sup>H spectrum (500 MHz, CDCl<sub>3</sub>)

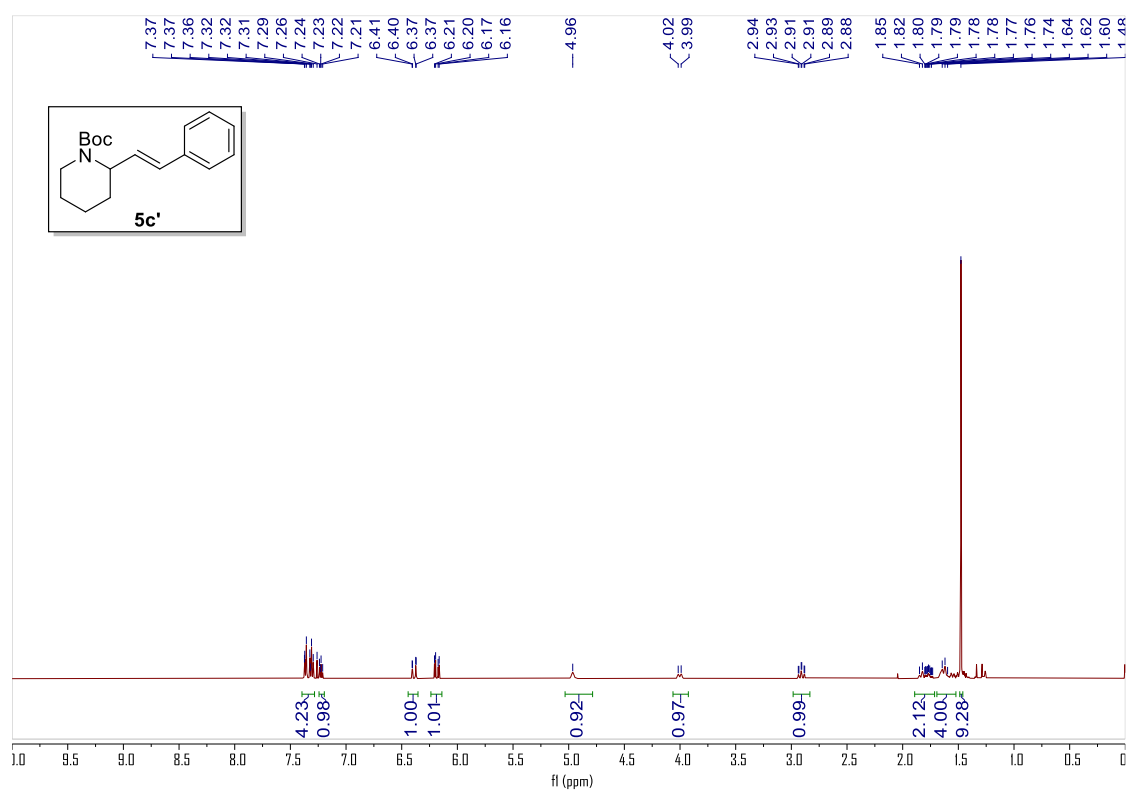

<sup>13</sup>C spectrum (126 MHz, CDCl<sub>3</sub>)

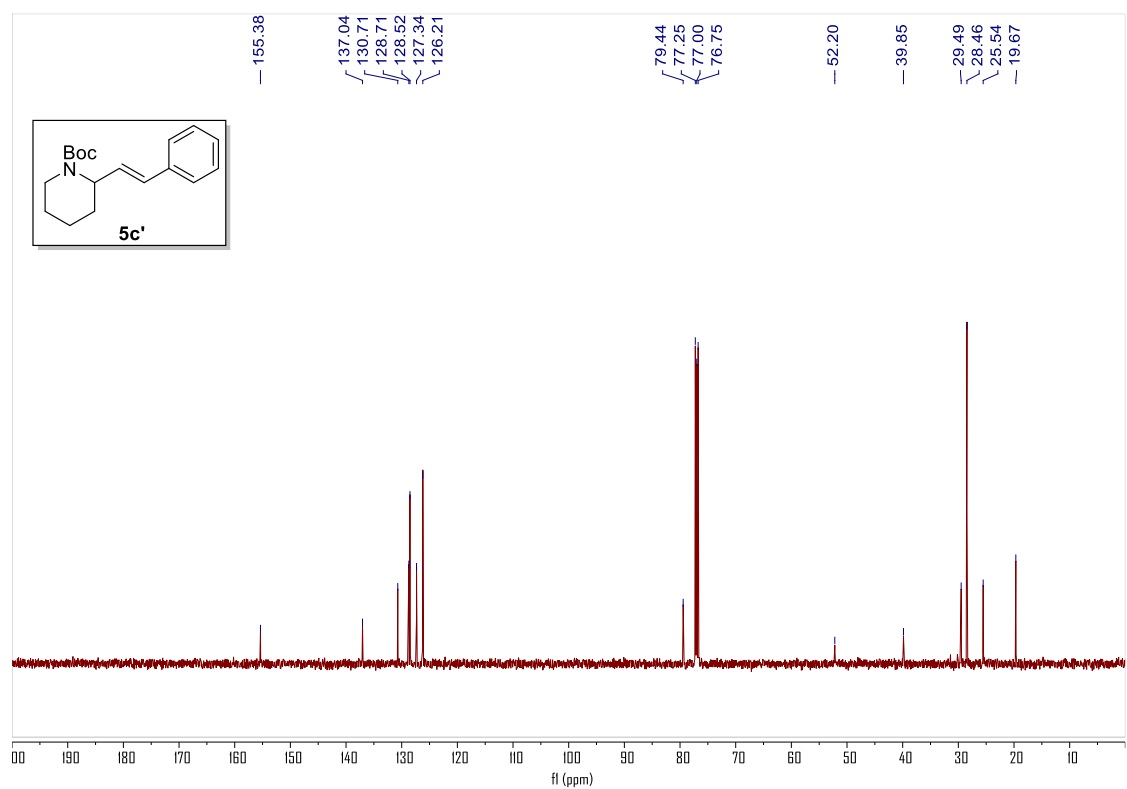

(2S,3R,6S)-2-methyl-6-((E)-styryl)-3,6-dihydro-2H-pyran-3-yl acetate (5d')

<sup>1</sup>H spectrum (400 MHz, CDCl<sub>3</sub>)

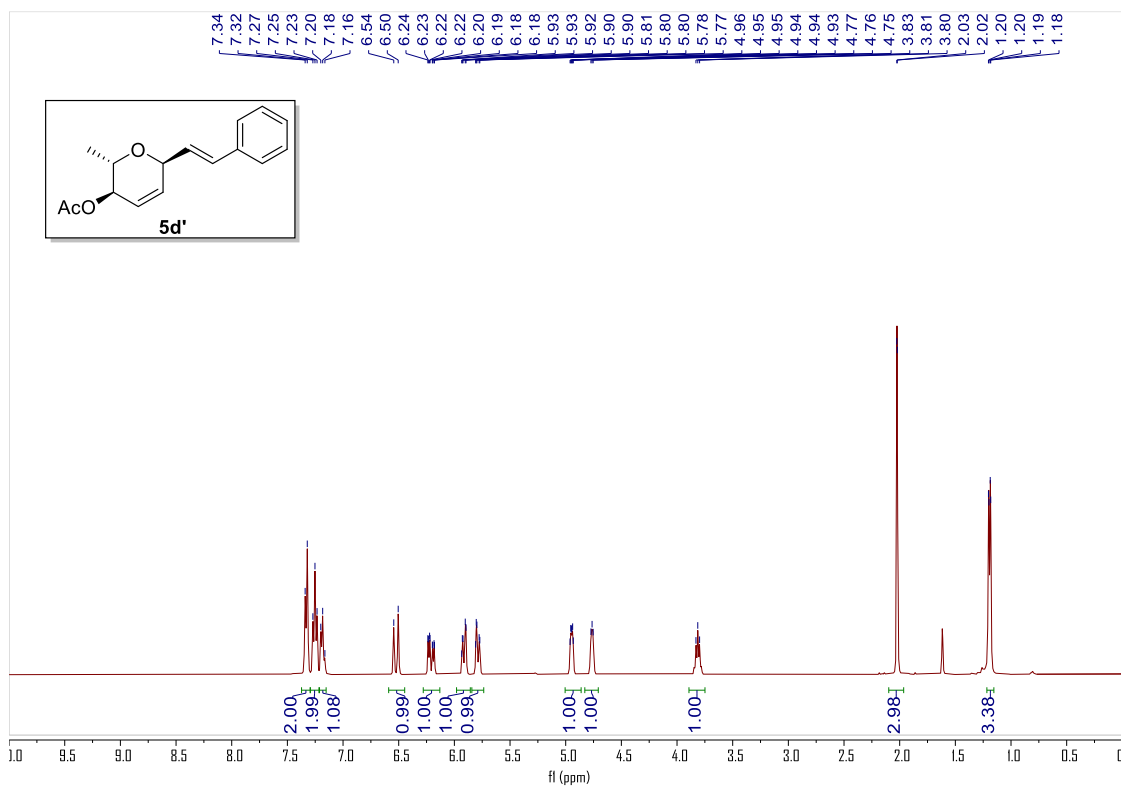

<sup>13</sup>C spectrum (101 MHz, CDCl<sub>3</sub>)

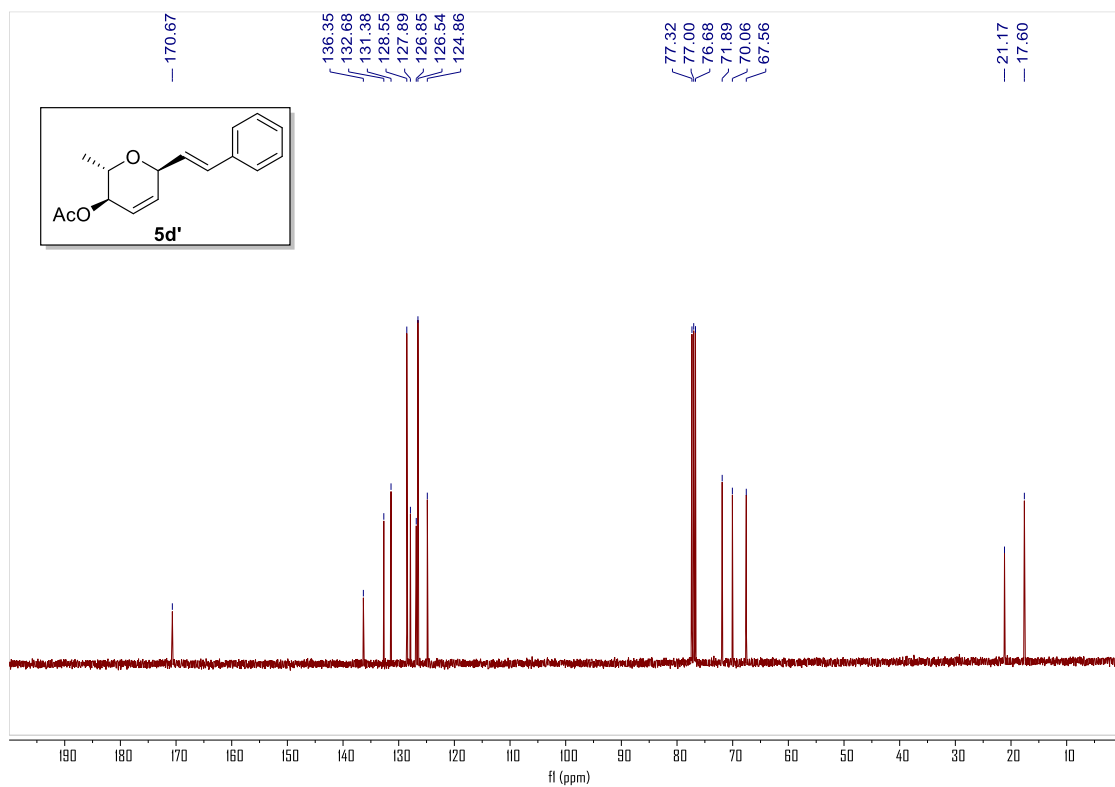

$^1\text{H}$   $^1\text{H}$  COSY NMR

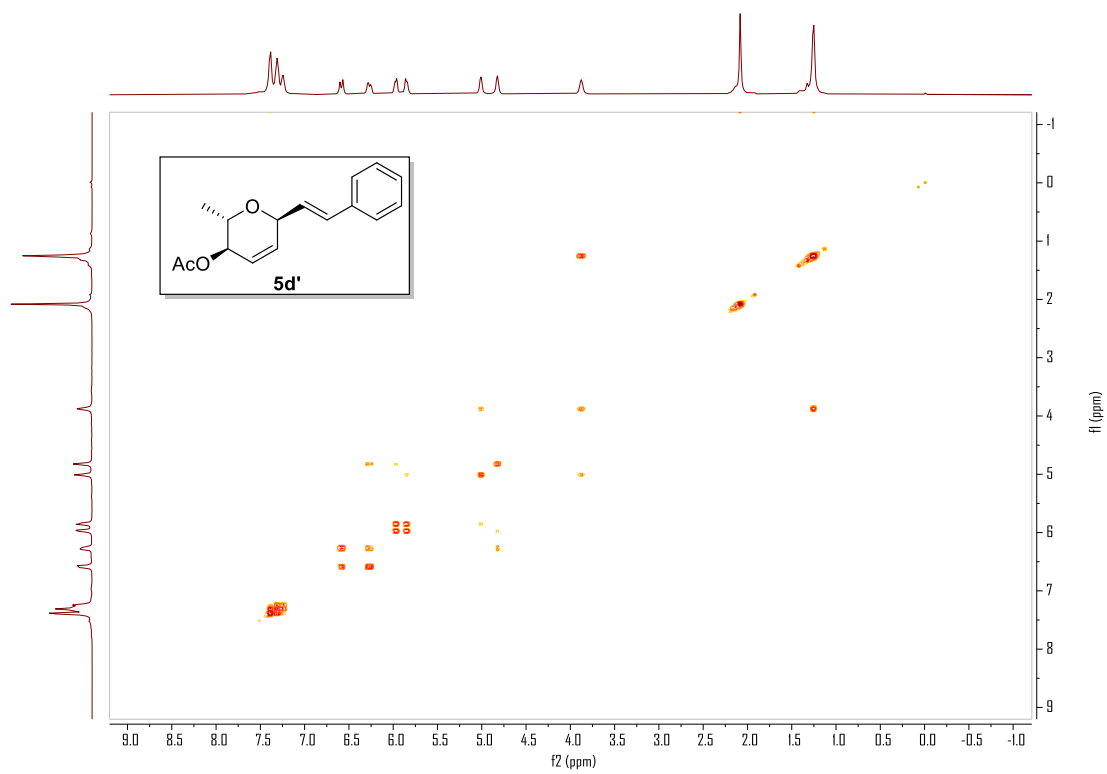

$^1\text{H}$   $^1\text{H}$  NOESY NMR

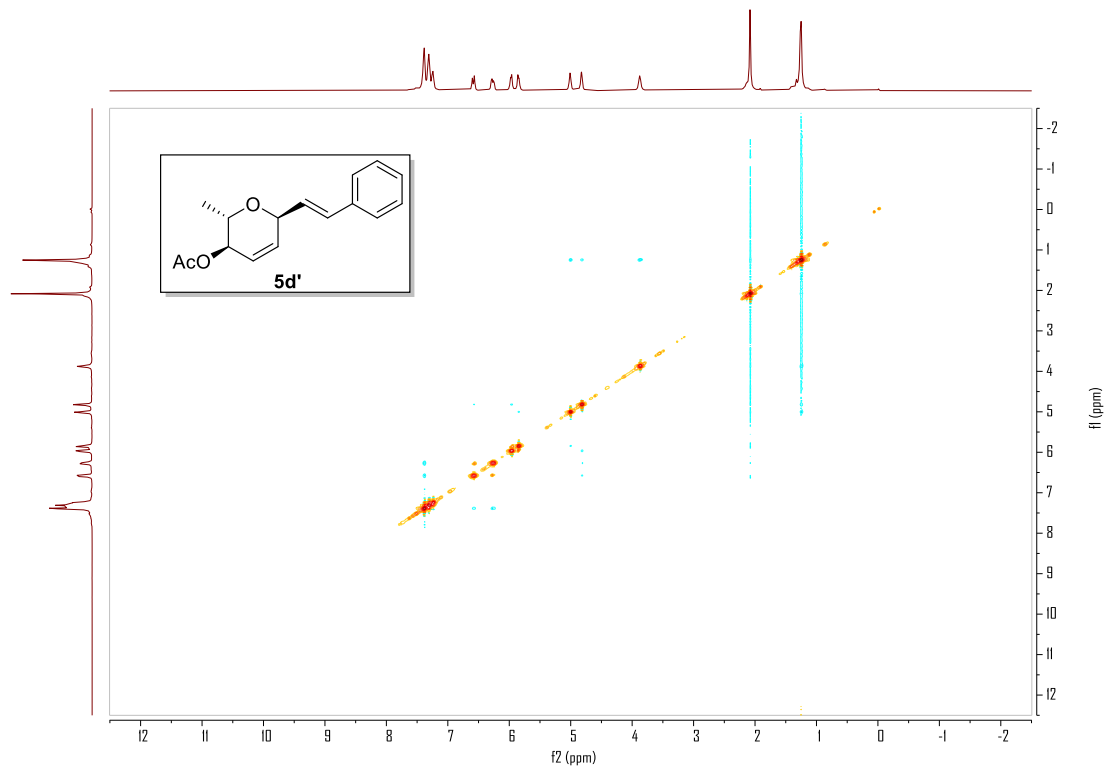

**((2R,3S,6R)-3-acetoxy-6-((E)-styryl)-3,6-dihydro-2H-pyran-2-yl)methyl acetate**  
**(5e')**

<sup>1</sup>H spectrum (500 MHz, CDCl<sub>3</sub>)

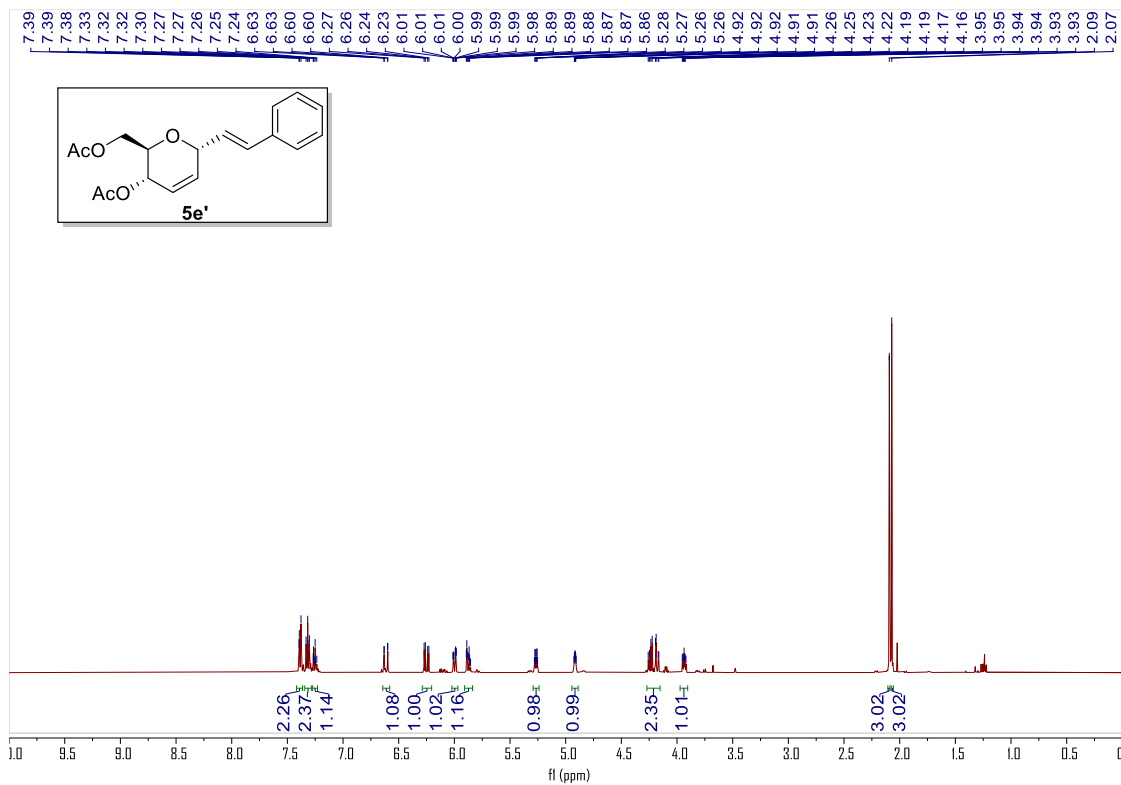

<sup>13</sup>C spectrum (126 MHz, CDCl<sub>3</sub>)

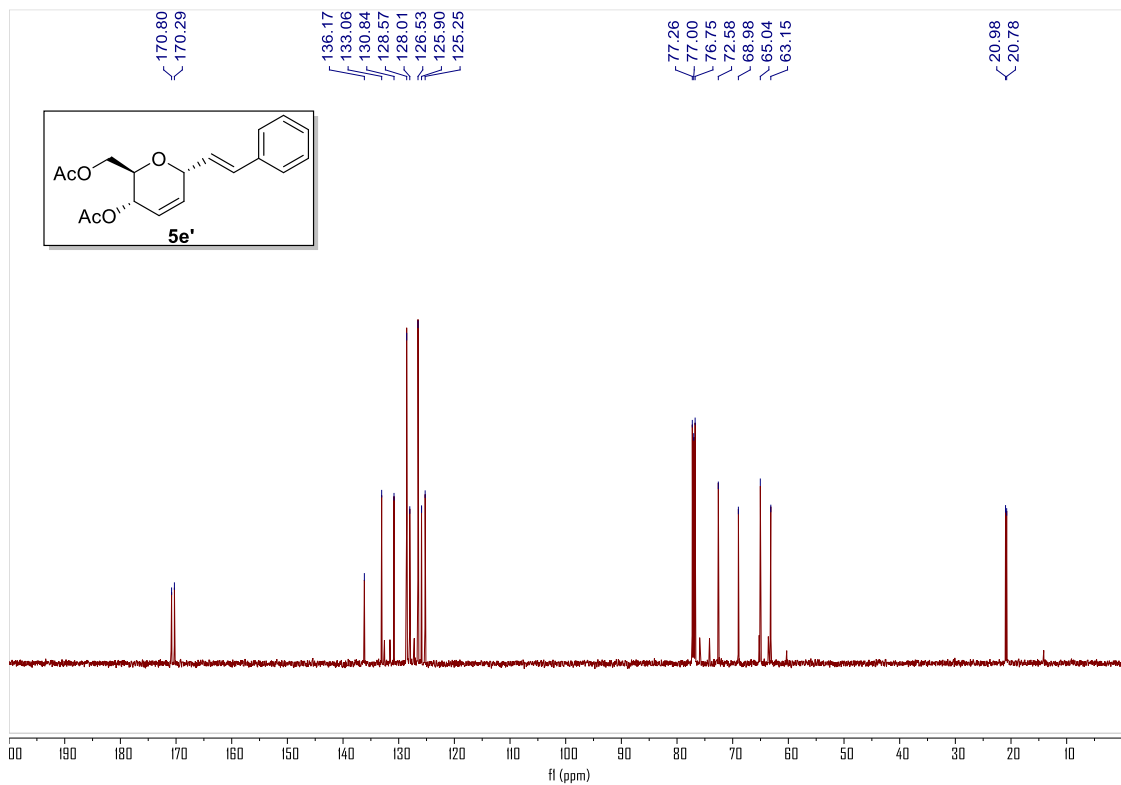

**(2R,3S,6R)-3-(benzyloxy)-2-((benzyloxy)methyl)-6-((E)-styryl)-3,6-dihydro-2H-pyran (5f')**

<sup>1</sup>H spectrum (400 MHz, CDCl<sub>3</sub>)

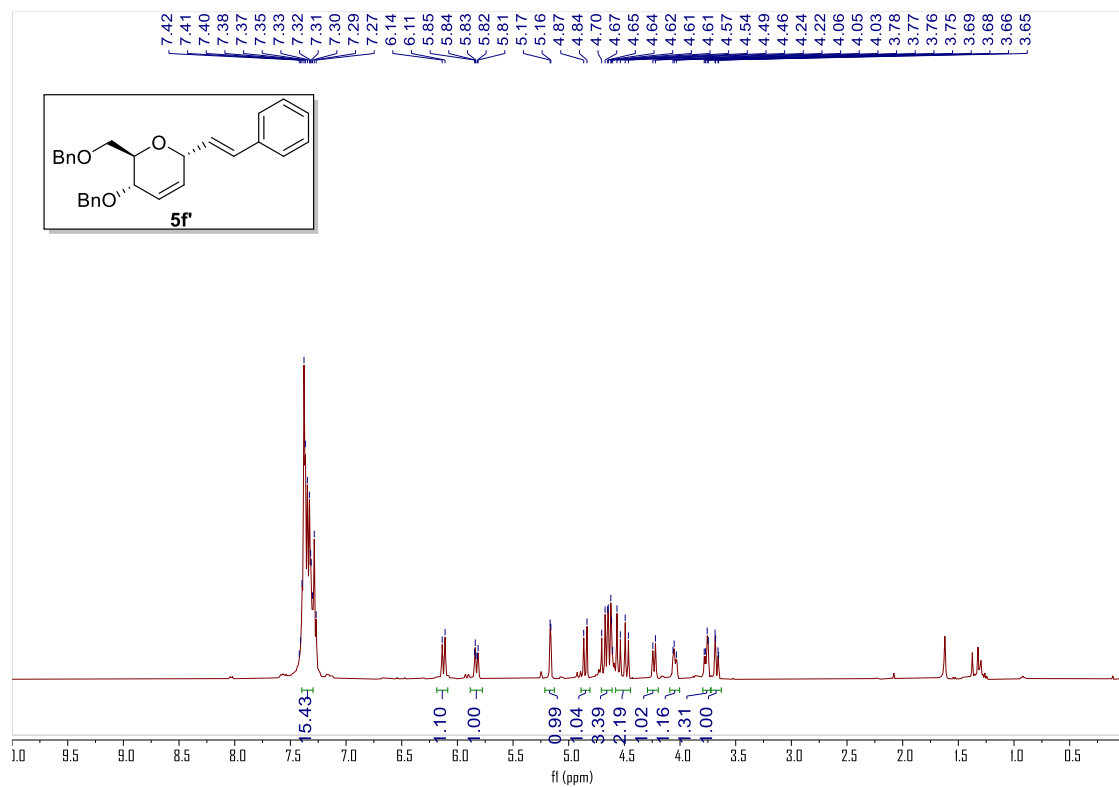

<sup>13</sup>C spectrum (101 MHz, CDCl<sub>3</sub>)

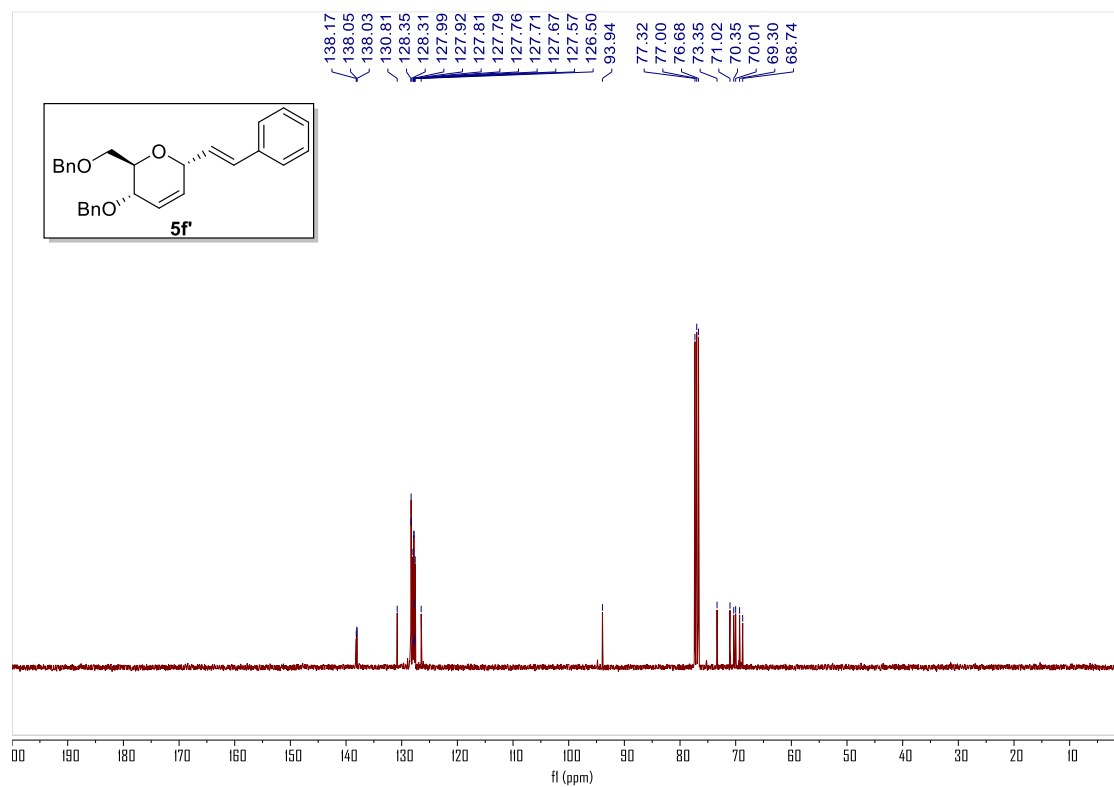



## 2-phenethyltetrahydro-2H-pyran (6)

$^1\text{H}$  spectrum (500 MHz,  $\text{CDCl}_3$ )

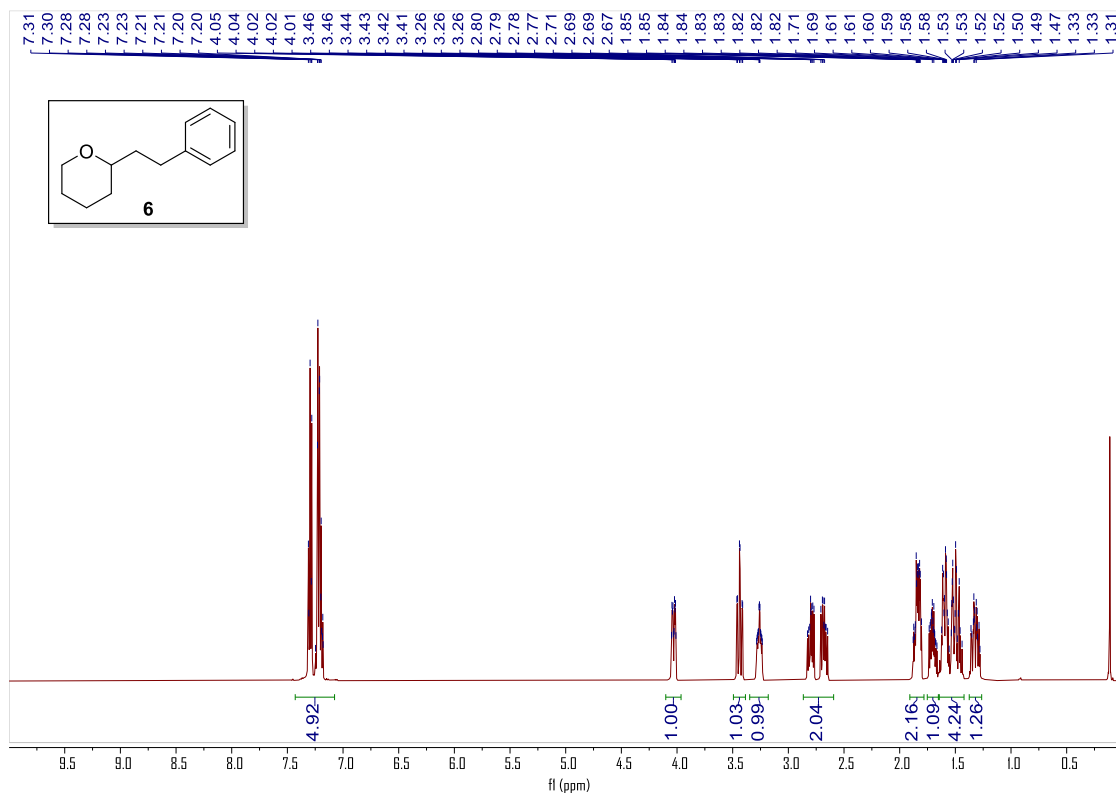

$^{13}\text{C}$  spectrum (126 MHz,  $\text{CDCl}_3$ )

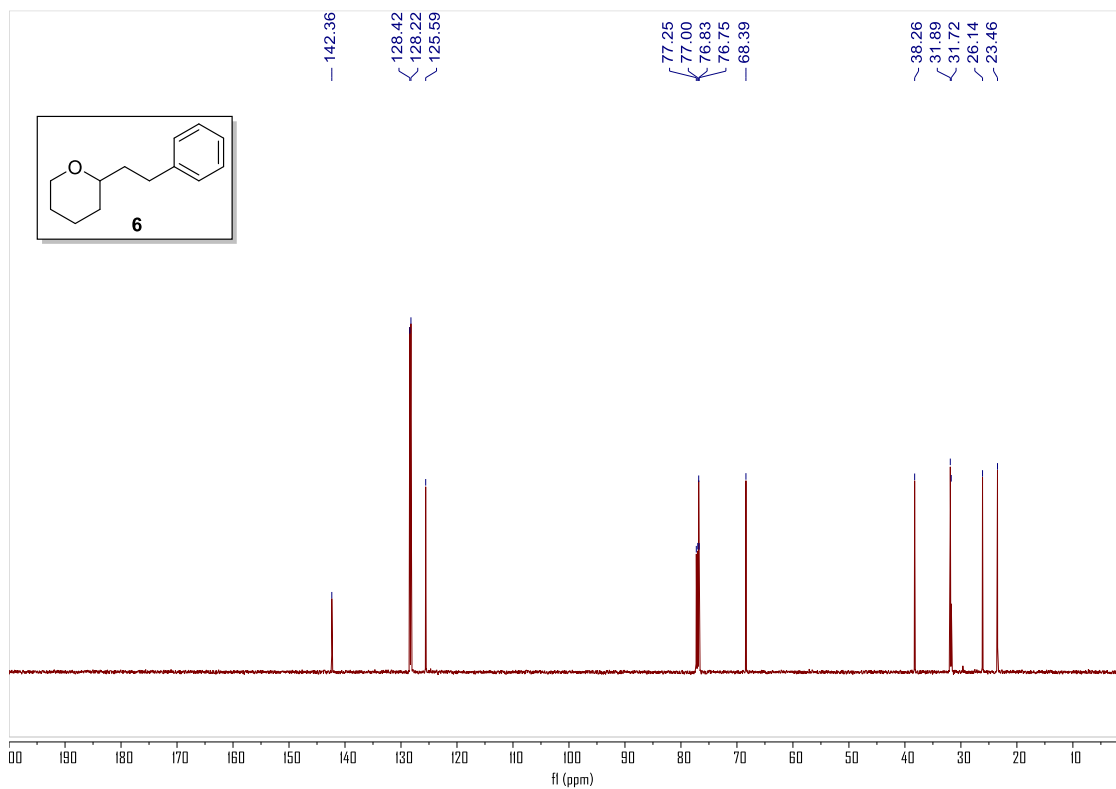

## 2-(3-phenyloxiran-2-yl)tetrahydro-2H-pyran (7)

$^1\text{H}$  spectrum (400 MHz,  $\text{CDCl}_3$ )

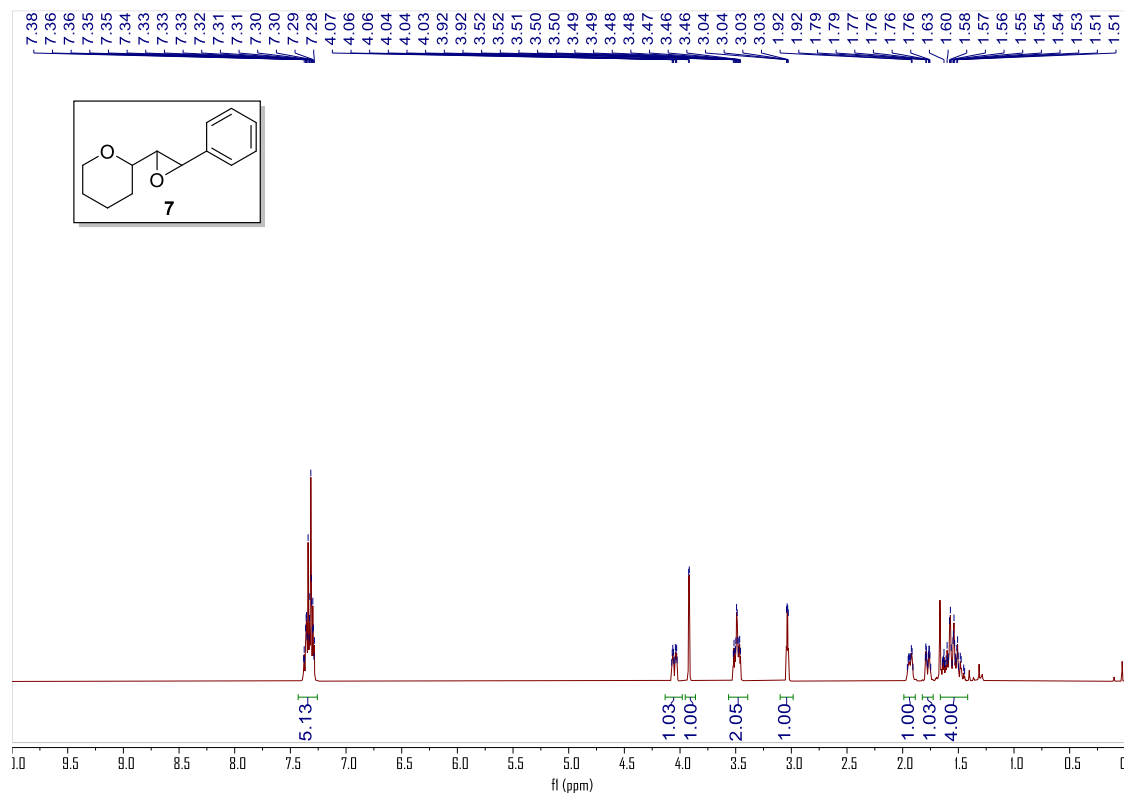

$^{13}\text{C}$  spectrum (101 MHz,  $\text{CDCl}_3$ )

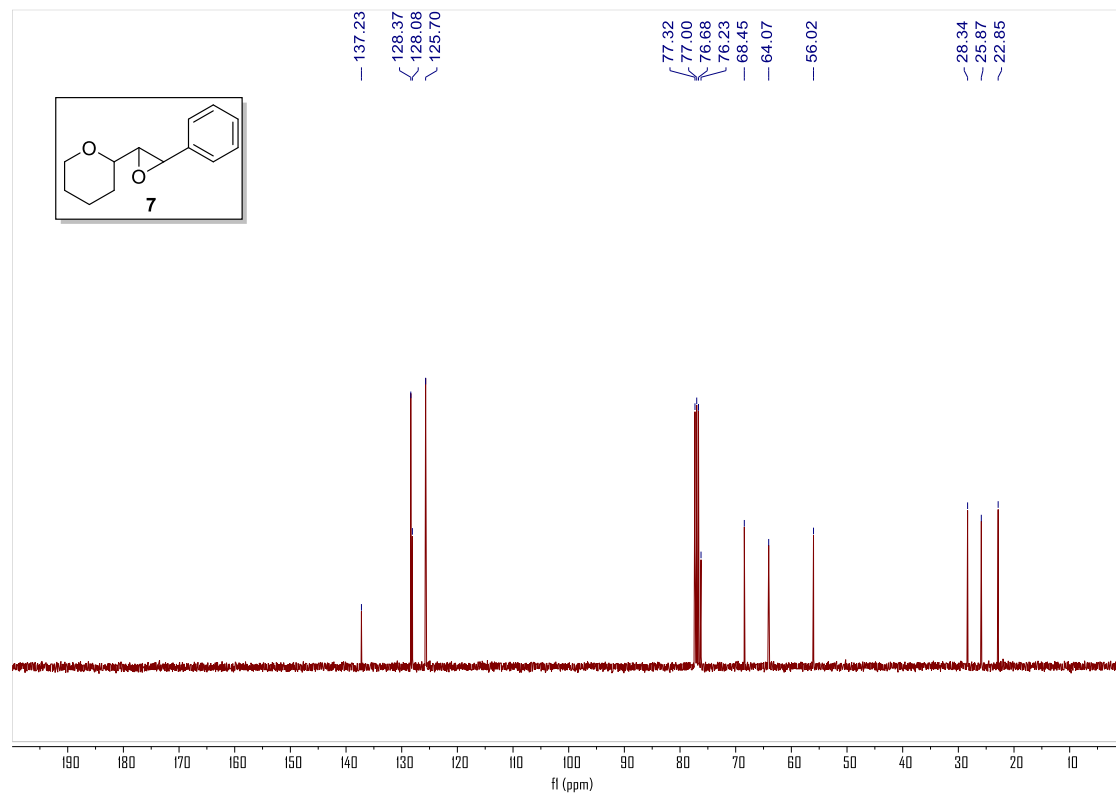

# 1-phenyl-2-(tetrahydro-2H-pyran-2-yl)ethan-1-ol (8)

$^1\text{H}$  spectrum (400 MHz,  $\text{CDCl}_3$ )

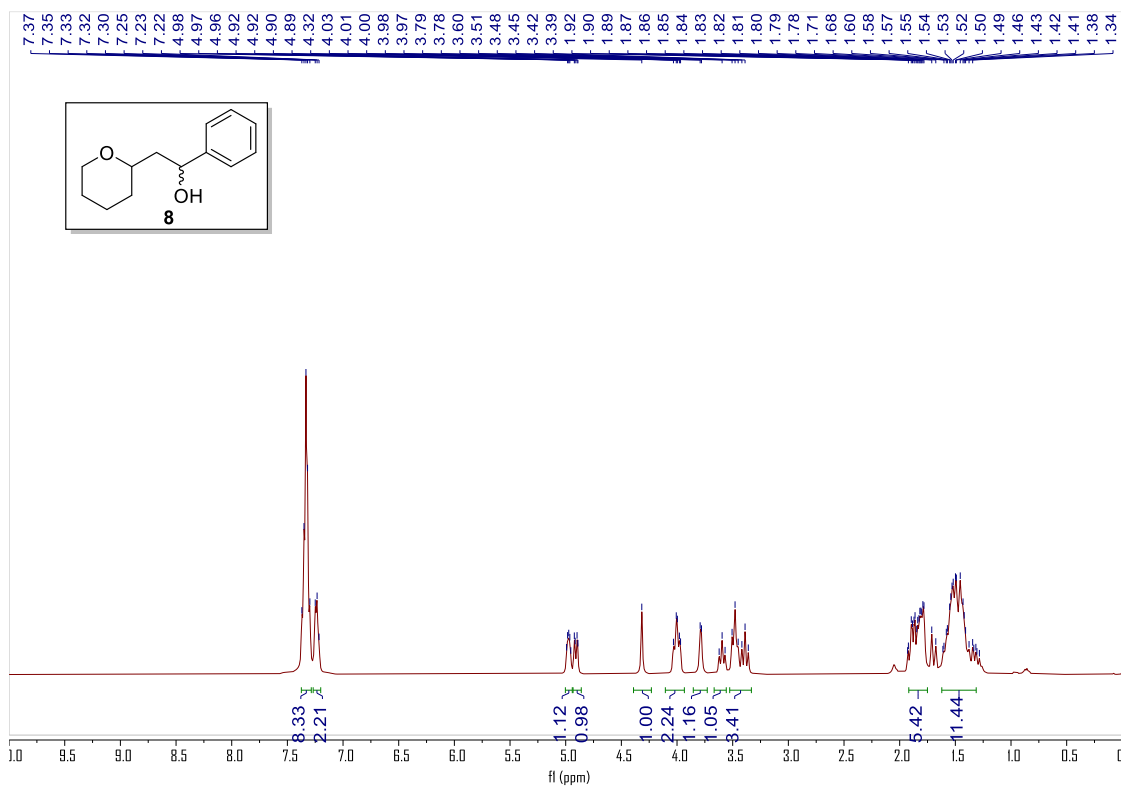

$^{13}\text{C}$  spectrum (126 MHz,  $\text{CDCl}_3$ )

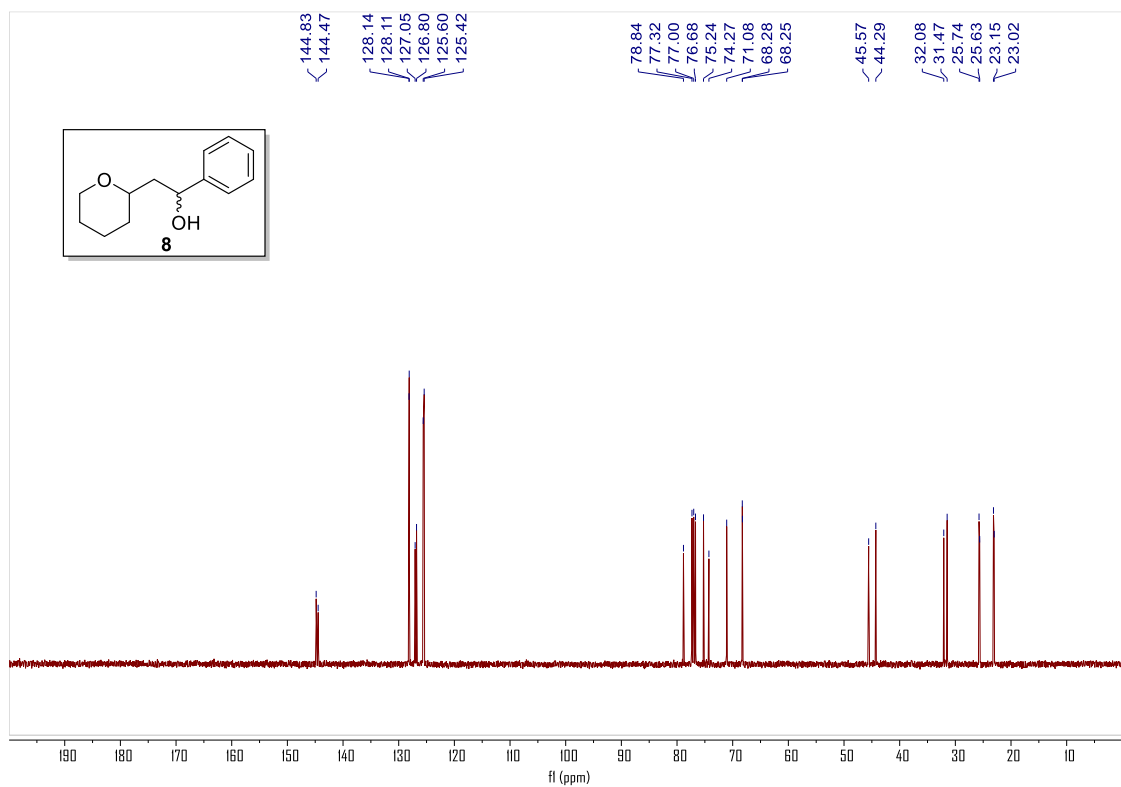

**ethyl 4-cyano-3-phenyl-2-(tetrahydro-2H-pyran-2-yl)-3,4-dihydro-2H-benzo[b][1,4]thiazine-6-carboxylate (10)**

<sup>1</sup>H spectrum (400 MHz, CDCl<sub>3</sub>)

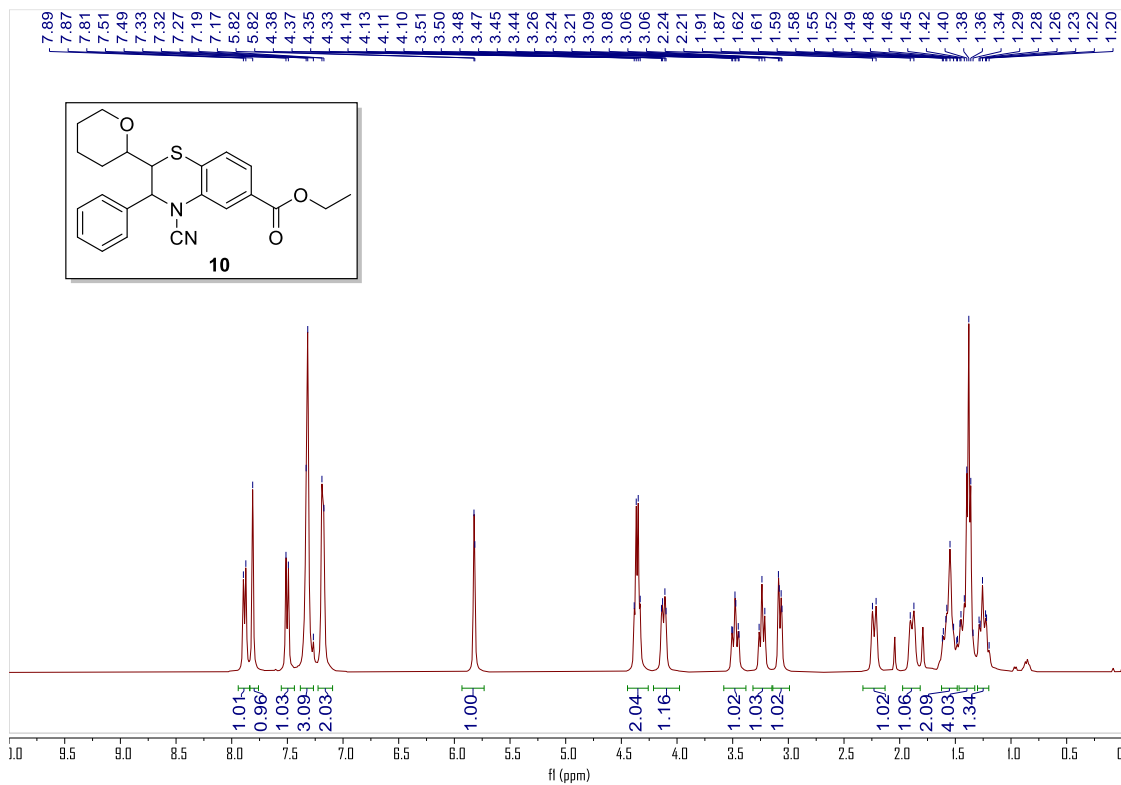

<sup>13</sup>C spectrum (101 MHz, CDCl<sub>3</sub>)

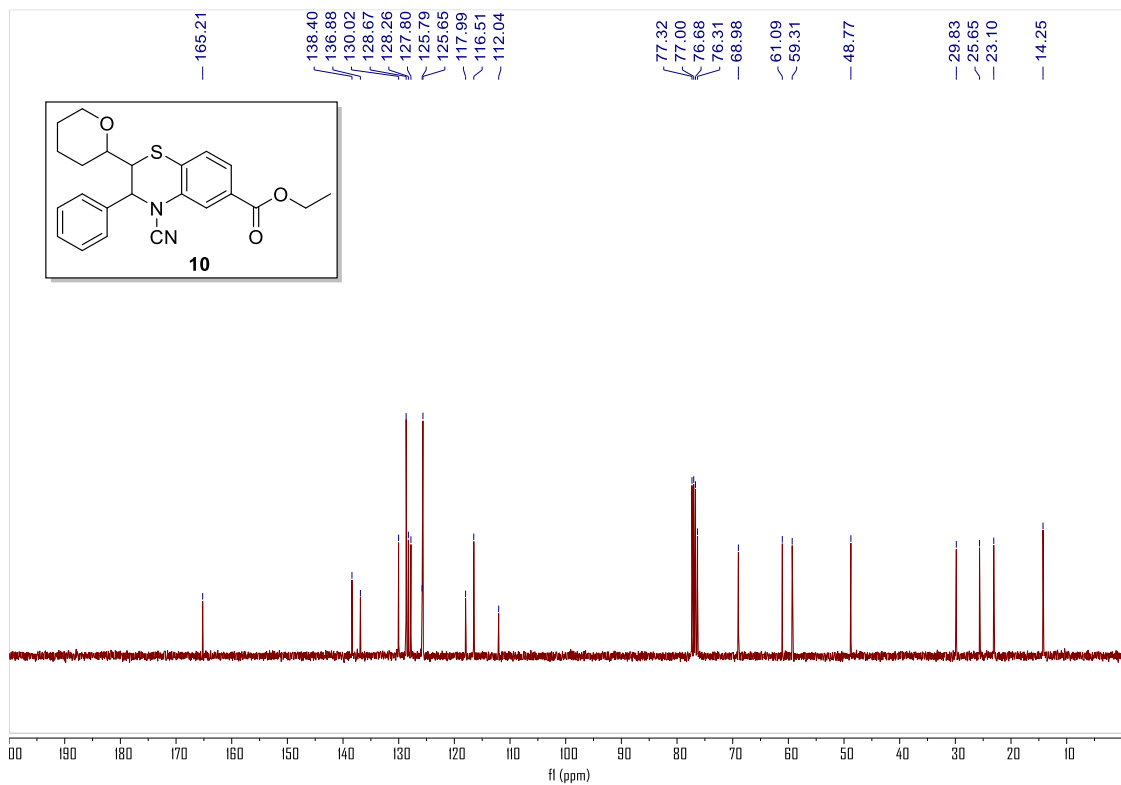

## 11. Supplementary References

1. A. Bismuto, M. J. Cowley and S. P. Thomas, Zwitterion-Initiated Hydroboration of Alkynes and Styrene, *Adv. Synth. Catal.*, 2021, **363**, 2382–2385.
2. V. Bagutski, A. Ros and V. K. Aggarwal, Improved method for the conversion of pinacolboronic esters into trifluoroborate salts: facile synthesis of chiral secondary and tertiary trifluoroborates, *Tetrahedron*, 2009, **65**, 9956–9960.
3. B. Wang, D.-C. Xiong and X.-S. Ye, Direct C–H Trifluoromethylation of Glycals by Photoredox Catalysis, *Org. Lett.*, 2015, **17**, 5698–5701.
4. M. T. Rahman, A. M. Decker, L. Laudermilk, R. Maitra, W. Ma, S. Ben Hamida, E. Darcq, B. L. Kieffer and C. Jin, Evaluation of Amide Bioisosteres Leading to 1,2,3-Triazole Containing Compounds as GPR88 Agonists: Design, Synthesis, and Structure–Activity Relationship Studies, *J. Med. Chem.*, 2021, **64**, 12397–12413.
5. Y. Bai, Z. Lin, Z. Ye, D. Dong, J. Wang, L. Chen, F. Xie, Y. Li, P. H. Dixneuf and M. Zhang, Ruthenium-Catalyzed Regioselective Hydrohalogenation of Alkynes Mediated by Trimethylsilyl Triflate, *Org. Lett.*, 2022, **24**, 7988–7992.
6. B. Mao, Z.-W. Chen, J.-F. Wang, C.-H. Zhang, Z.-Q. Du and C.-M. Yu, Enantioselective Conjugate Addition of Alkenyl Trifluoroborates to Alkenyl-Substituted Benzimidazoles Catalyzed by Chiral Binaphthols, *Org. Lett.*, 2022, **24**, 6588–6593.
7. W. B. Reid, J. J. Spillane, S. B. Krause and D. A. Watson, Direct Synthesis of Alkenyl Boronic Esters from Unfunctionalized Alkenes: A Boryl-Heck Reaction, *J. Am. Chem. Soc.*, 2016, **138**, 5539–5542.
8. P. Xiong, M. Hemming, S. I. Ivlev and E. Meggers, Electrochemical Enantioselective Nucleophilic  $\alpha$ -C(sp<sup>3</sup>)-H Alkenylation of 2-Acyl Imidazoles, *J. Am. Chem. Soc.*, 2022, **144**, 6964–6971.
9. J. Brals, T. M. McGuire and A. J. B. Watson, A Chemoselective Polarity-Mismatched Photocatalytic C(sp<sup>3</sup>)-C(sp<sup>2</sup>) Cross-Coupling Enabled by Synergistic Boron Activation, *Angew. Chem.Int. Ed.*, 2023, **62**, e202310462.
10. K. Cheng, 2-Aryl-4-Quinolone Derivative as well as Preparation Method and

Application Thereof. CN108610286A, 2018.

11. A. N. Baumann, A. Music, J. Dechent, N. Müller, T. C. Jagau and D. Didier, Electro-Olefination—A Catalyst Free Stereoconvergent Strategy for the Functionalization of Alkenes, *Chem. Eur. J.*, 2020, **26**, 8382–8387.

12. Y. Yasu, T. Koike and M. Akita, Visible-light-induced synthesis of a variety of trifluoromethylated alkenes from potassium vinyltrifluoroborates by photoredox catalysis, *Chem. Commun.*, 2013, **49**, 2037-2039.

13. P.-K. Peng and J. A. May, Enantioselective Organocatalytic Conjugate Addition in a Tandem Synthesis of  $\delta$ -Substituted Cyclohexenones and Four-Step Total Synthesis of Penienone, *Org. Lett.*, 2022, **24**, 5334–5338.

14. G. A. Molander, T. Barcellos and K. M. Traister, Pd-Catalyzed Cross-Coupling of Potassium Alkenyltrifluoroborates with 2-Chloroacetates and 2-Chloroacetamides, *Org. Lett.*, 2013, **15**, 3342–3345.

15. Y. Yu, D.-C. Xiong and X.-S. Ye, 2-Trifluoromethylthiolation of glycals, *Org. Biomol. Chem.*, 2016, **14**, 6403-6406.

16. Pesavento, R. P. Substituted Cyclic Ether Polymers, and Conjugates and Uses Thereof. WO2016130527A1. 2016.

17. T T. Kawashima, M. Nakamura and N. Inamoto, Tandem Peterson-Michael reaction using  $\alpha$ -silylalkylphosphine chalcogenides and Horner-Emmons reaction of in situ generated  $\alpha$ -carbanions of its products, *Heterocycles*, 1997, **44**, 487-507.

18. J. Zhao, W. Zhou, J. Han, G. Li and Y. Pan, Iron-catalyzed alkenylation of cyclic ethers via decarboxylative  $sp^3(C)$ - $sp^2(C)$  coupling, *Tetrahedron Lett.*, 2013, **54**, 6507-6510.

19. Y.-J. Jang, Y.-K. Shih, J.-Y. Liu, W.-Y. Kuo and C.-F. Yao, Improved one-pot synthesis of styryl tetrahydrofurans and cyclohexanes by radical addition to  $\beta$ -nitrostyrenes in the presence of benzoyl peroxide, *Chem. Eur. J.*, 2003, **9**, 2123-2128.

20. Z. Chen, Y.-X. Zhang, Y. An, X.-L. Song, Y.-H. Wang, L.-L. Zhu and L. Guo, Radical Addition of Ethers to Terminal Alkynes with High E-Selectivity, *Eur. J. Org. Chem.*, 2009, **30**, 5146-5152.

21. H. Zhao, A. T. Jose, A. Asany, S. M. Khan and M. R. Biscoe, Pd-Catalyzed Arylation of Secondary  $\alpha$ -Alkoxytricyclohexylstannanes, *Org. Lett.*, 2022, **24**, 8714-8718.
22. P. Gao, C. Yuan, Y. Zhao and Z. Shi, Copper-Catalyzed Asymmetric Defluoroborylation of 1-(Trifluoromethyl)Alkenes, *Chem*, 2018, **4**, 2201-2211.
23. M. H. Habibi, S. Tangestaninejad, I. Mohammadpoor-Baltork, V. Mirkhani and B. Yadollahi, Potassium dodecatungstocobaltate trihydrate ( $K_5CoW_{12}O_{40} \cdot 3H_2O$ ): a mild and efficient catalyst for the tetrahydropyranylation of alcohols and their detetrahydropyranylation, *Tetrahedron Lett.* 2001, **42**, 2851-2853.
24. W. Liu, T. Leischner, W. Li, K. Junge and M. Beller, A General Regioselective Synthesis of Alcohols by Cobalt-Catalyzed Hydrogenation of Epoxides, *Angew. Chem. Int. Ed.*, 2020, **59**, 11321-11324.
25. D. Noh, S. K. Yoon, J. Won, J. Y. Lee and J. Yun, An Efficient Copper(I)-Catalyst System for the Asymmetric Hydroboration of  $\beta$ -Substituted Vinylarenes with Pinacolborane, *Chem. Asian J.*, 2011, **6**, 1967-1969.
26. Q. Sun and X. Bao, Facile preparation of dihydro-1,4-benzothiazine derivatives via oxidative ring-expansion of 2-aminobenzothiazoles with olefins, *Chem. Commun.*, 2022, **58**, 2216-2219.
